# Supplementary material
Source: MDPI journal article supplement (https://www.mdpi.com/2073-4352/14/3/281)
Supplement: s1 [file s1]

## Supporting Information

**Synthesis and crystallographic characterization of heteroleptic Ir(III) complexes containing the *N*-oxide functional group and crystallographic characterization of Ir(III) *N*-oxide precursors.**

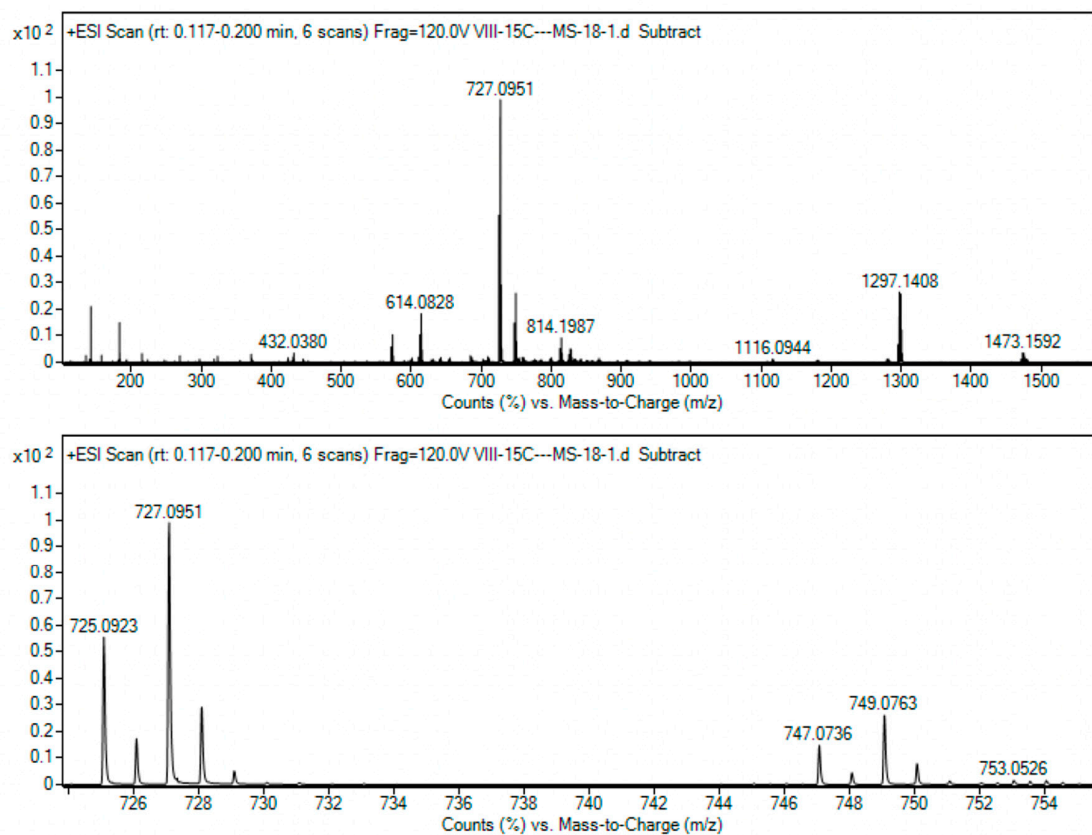

Figure S1: HRMS of compound 1.

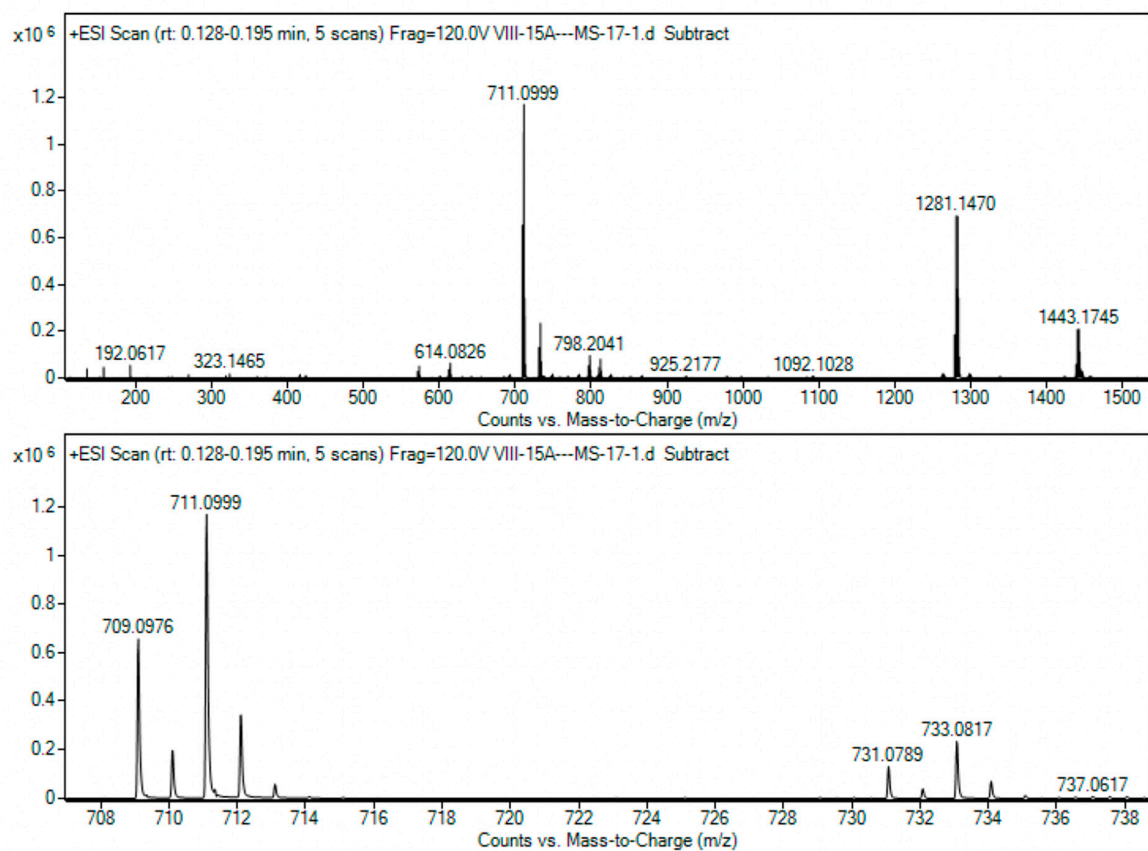

**Figure S2:** HRMS of compound 2.

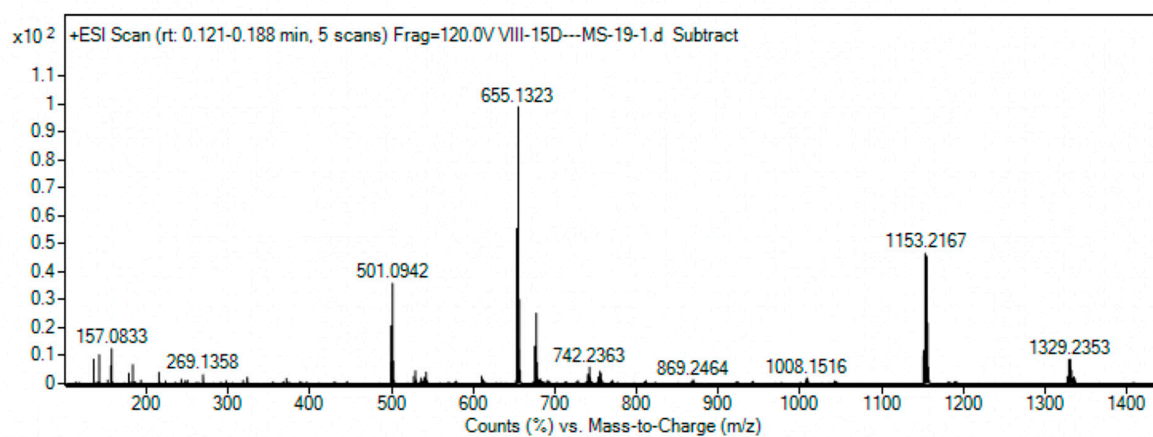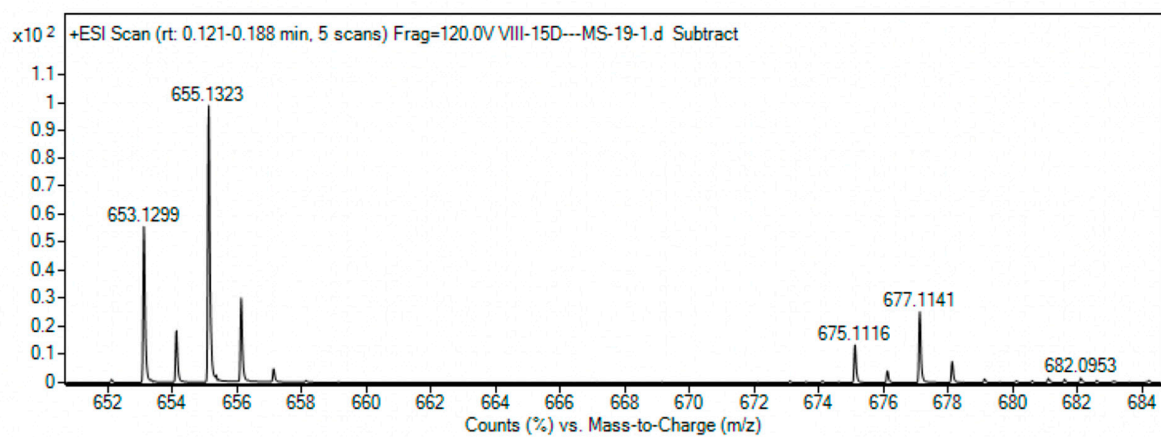

Figure S3: HRMS of compound 3.

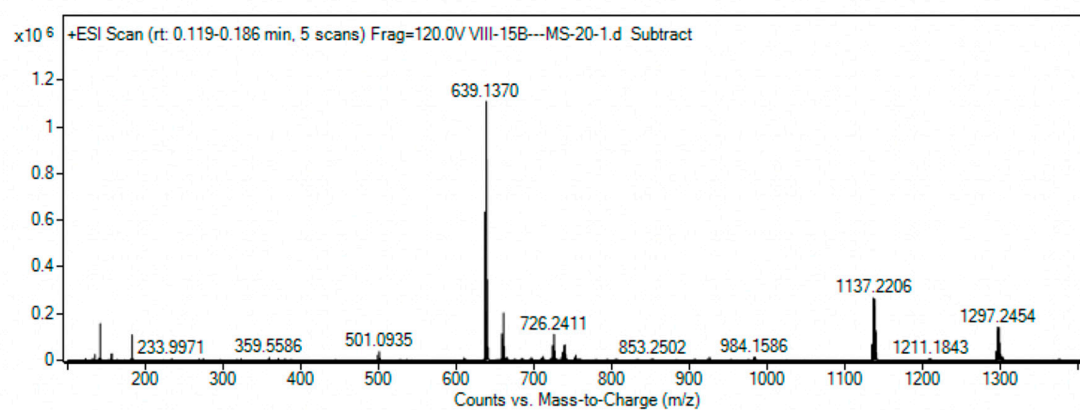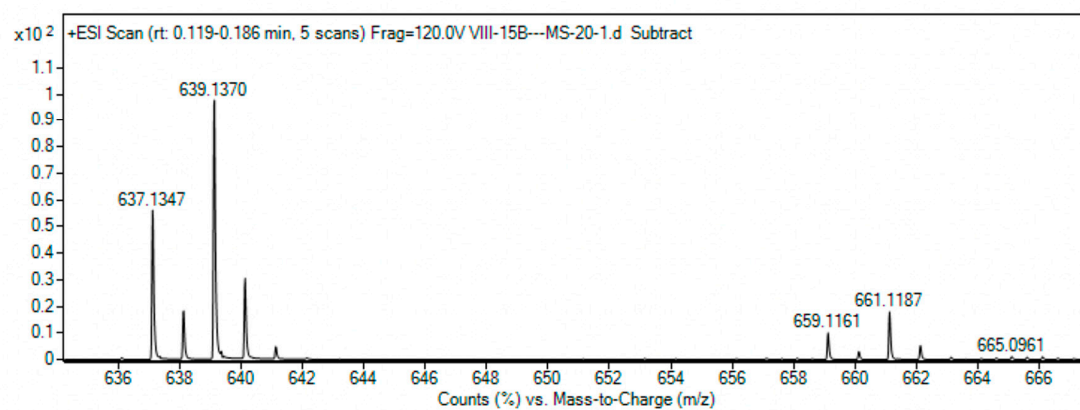

**Figure S4: HRMS of compound 4.**

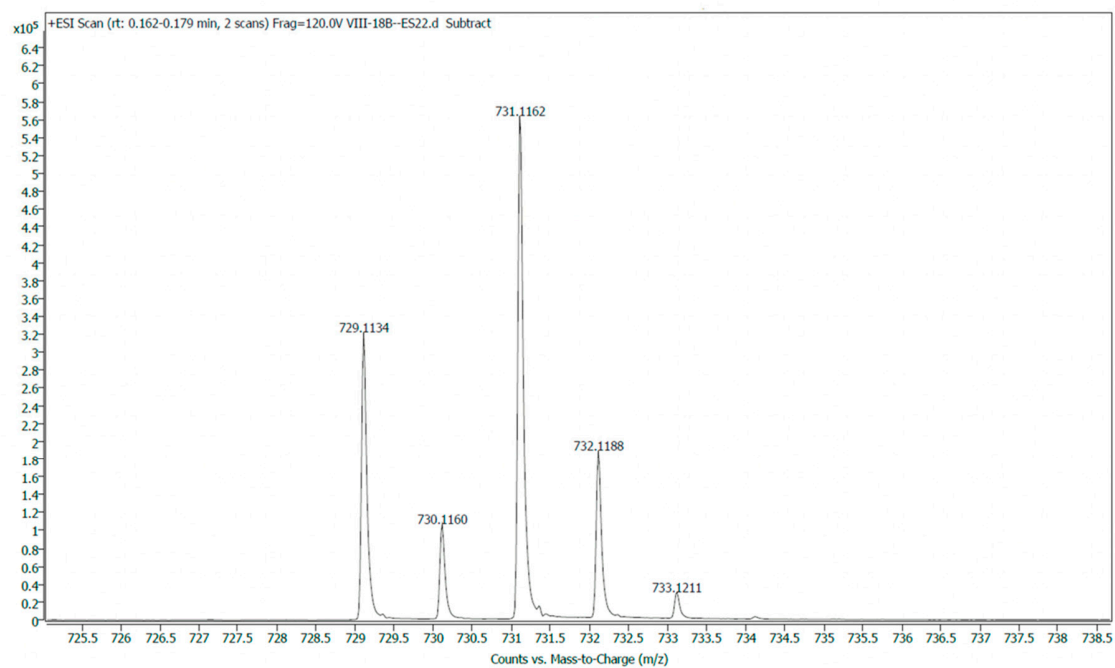

**Figure S5:** HRMS of compound 6.

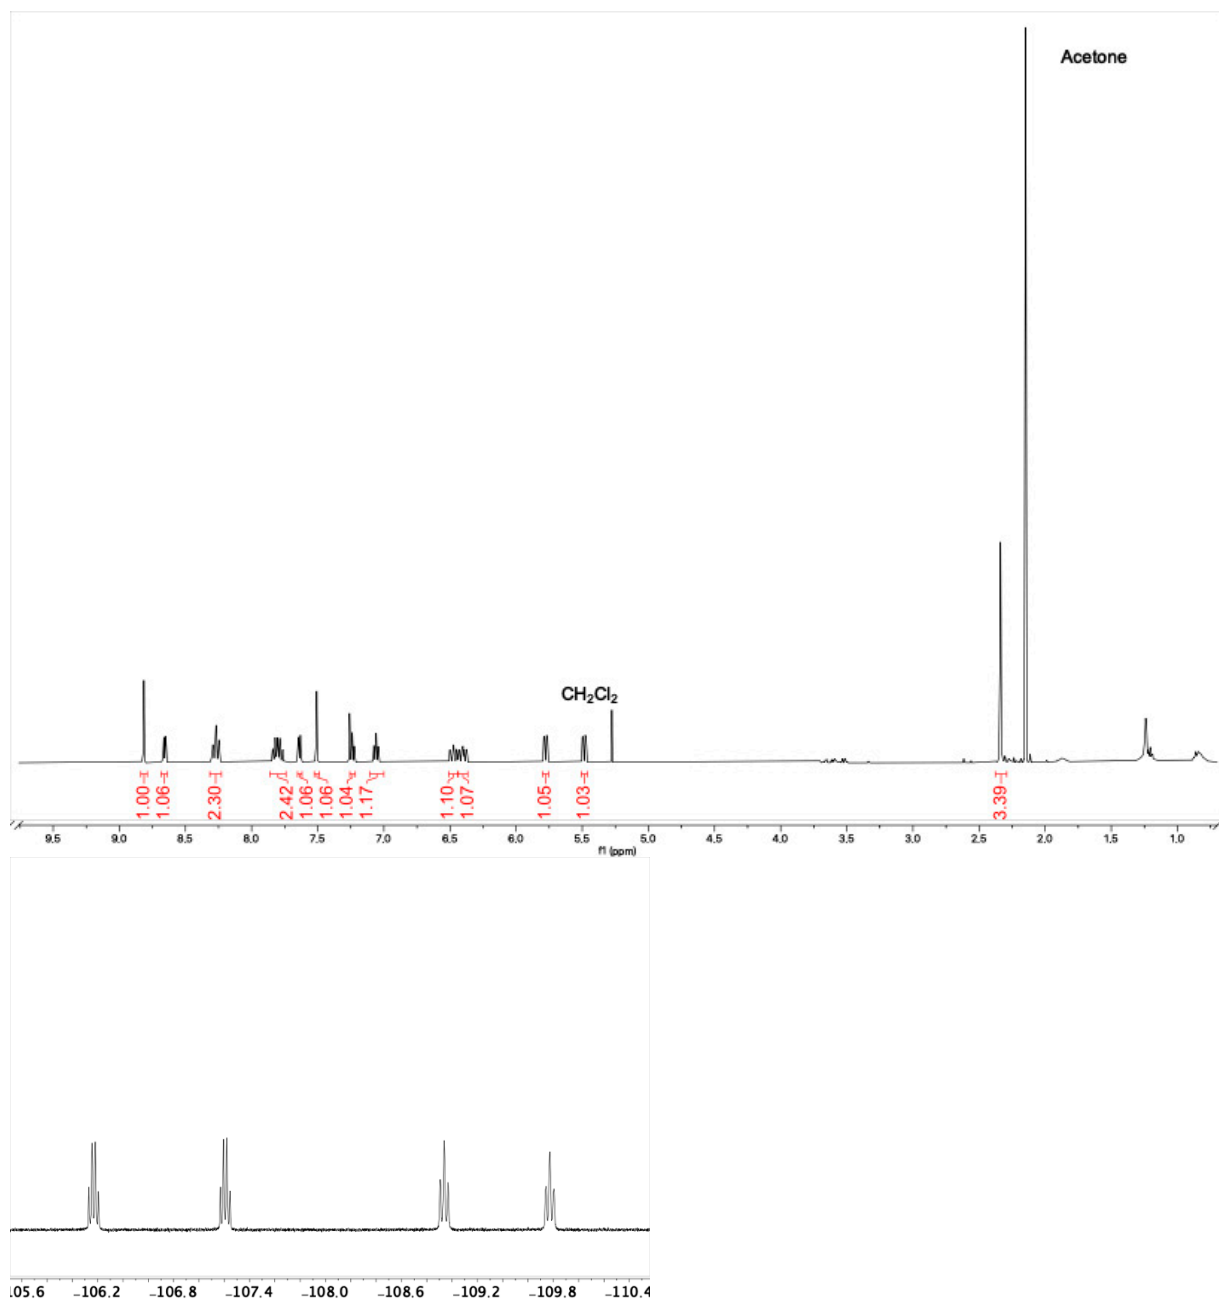

**Figure S6:** <sup>1</sup>H NMR (above) and <sup>19</sup>F NMR (below) of compound **1** in CDCl<sub>3</sub>.

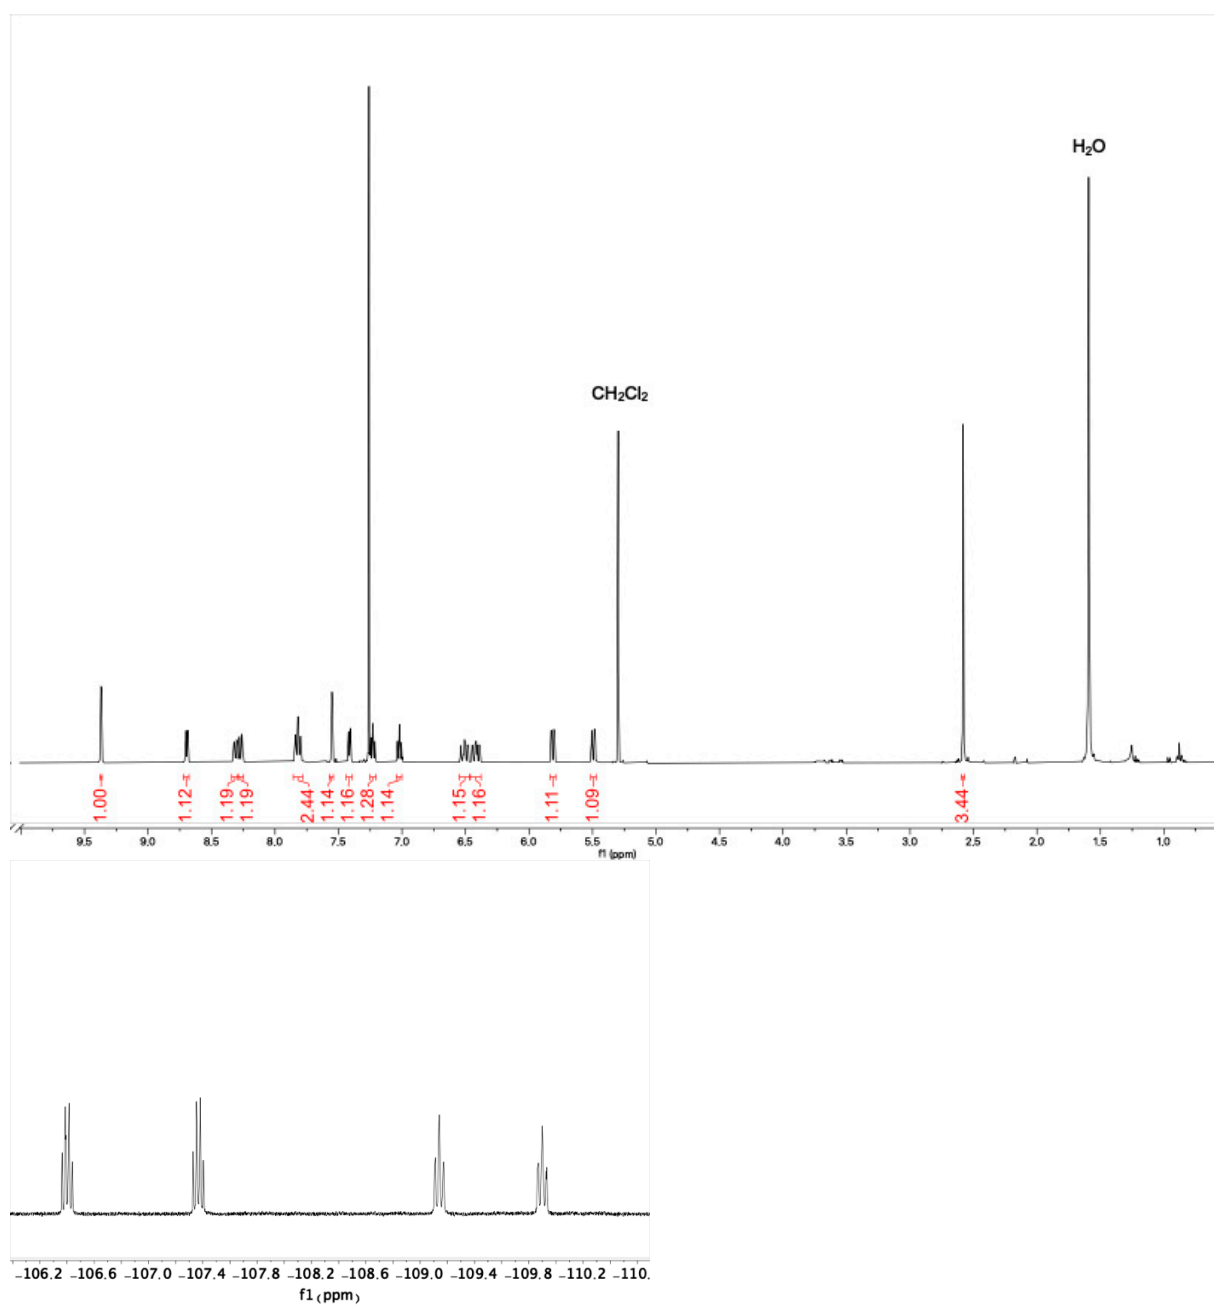

**Figure S7:** <sup>1</sup>H NMR (above) and <sup>19</sup>F NMR (below) of compound **2** in CDCl<sub>3</sub>.



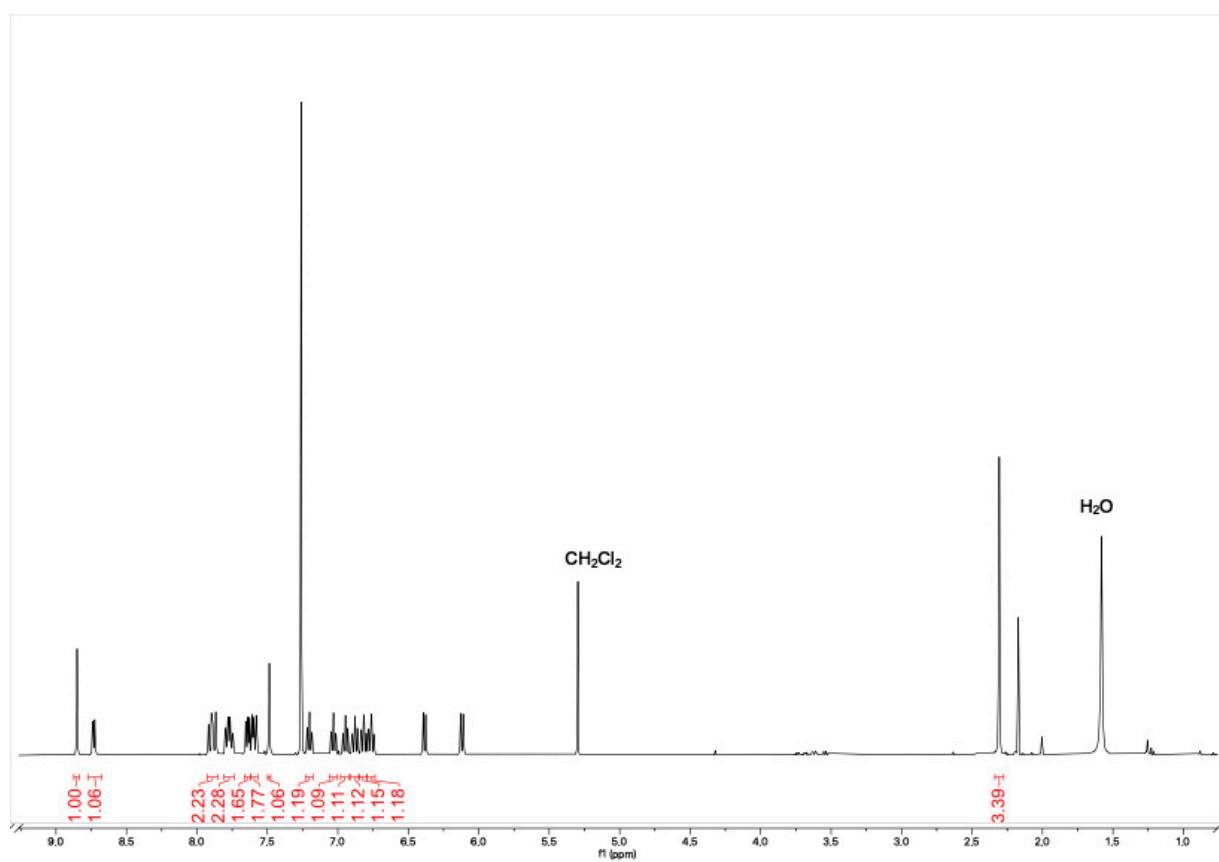

**Figure S8:** <sup>1</sup>H NMR of compound **3** in CDCl<sub>3</sub>.

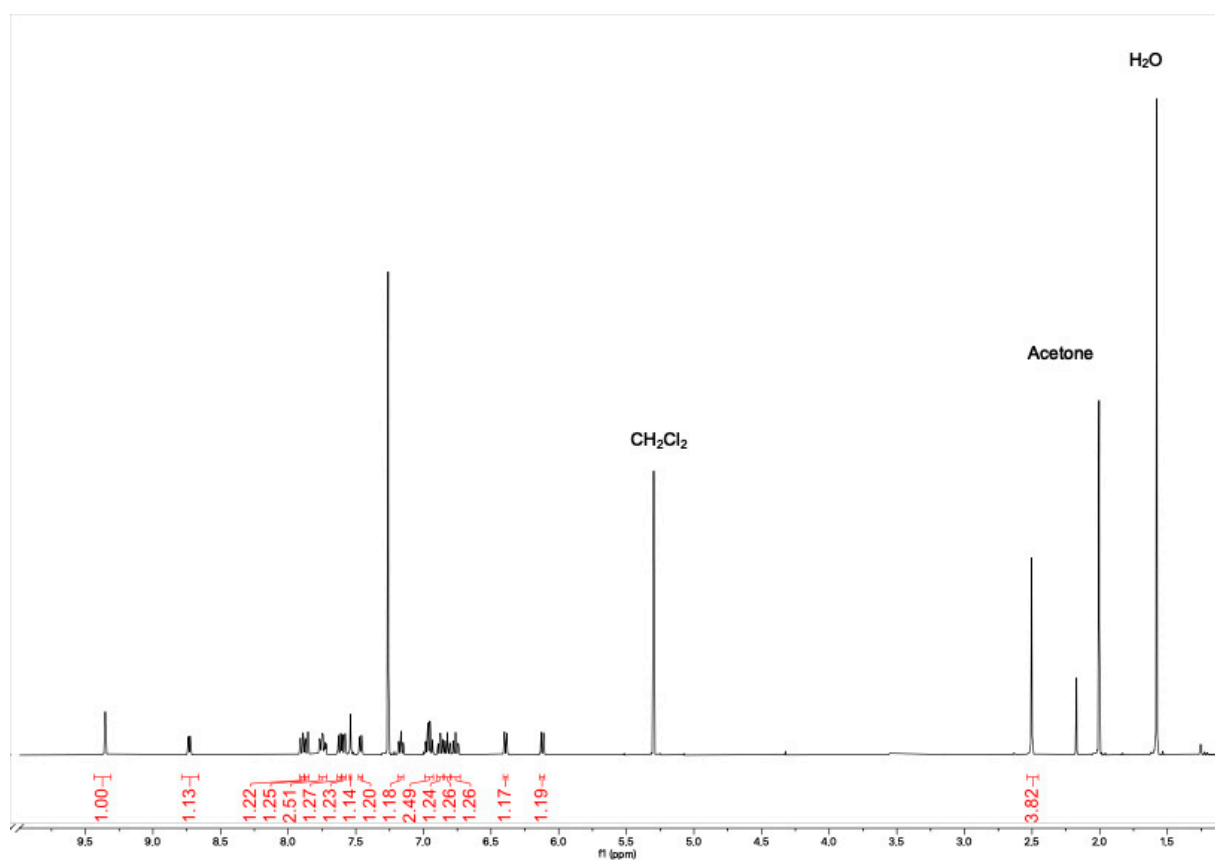

**Figure S9:** <sup>1</sup>H NMR of compound **4** in CDCl<sub>3</sub>.

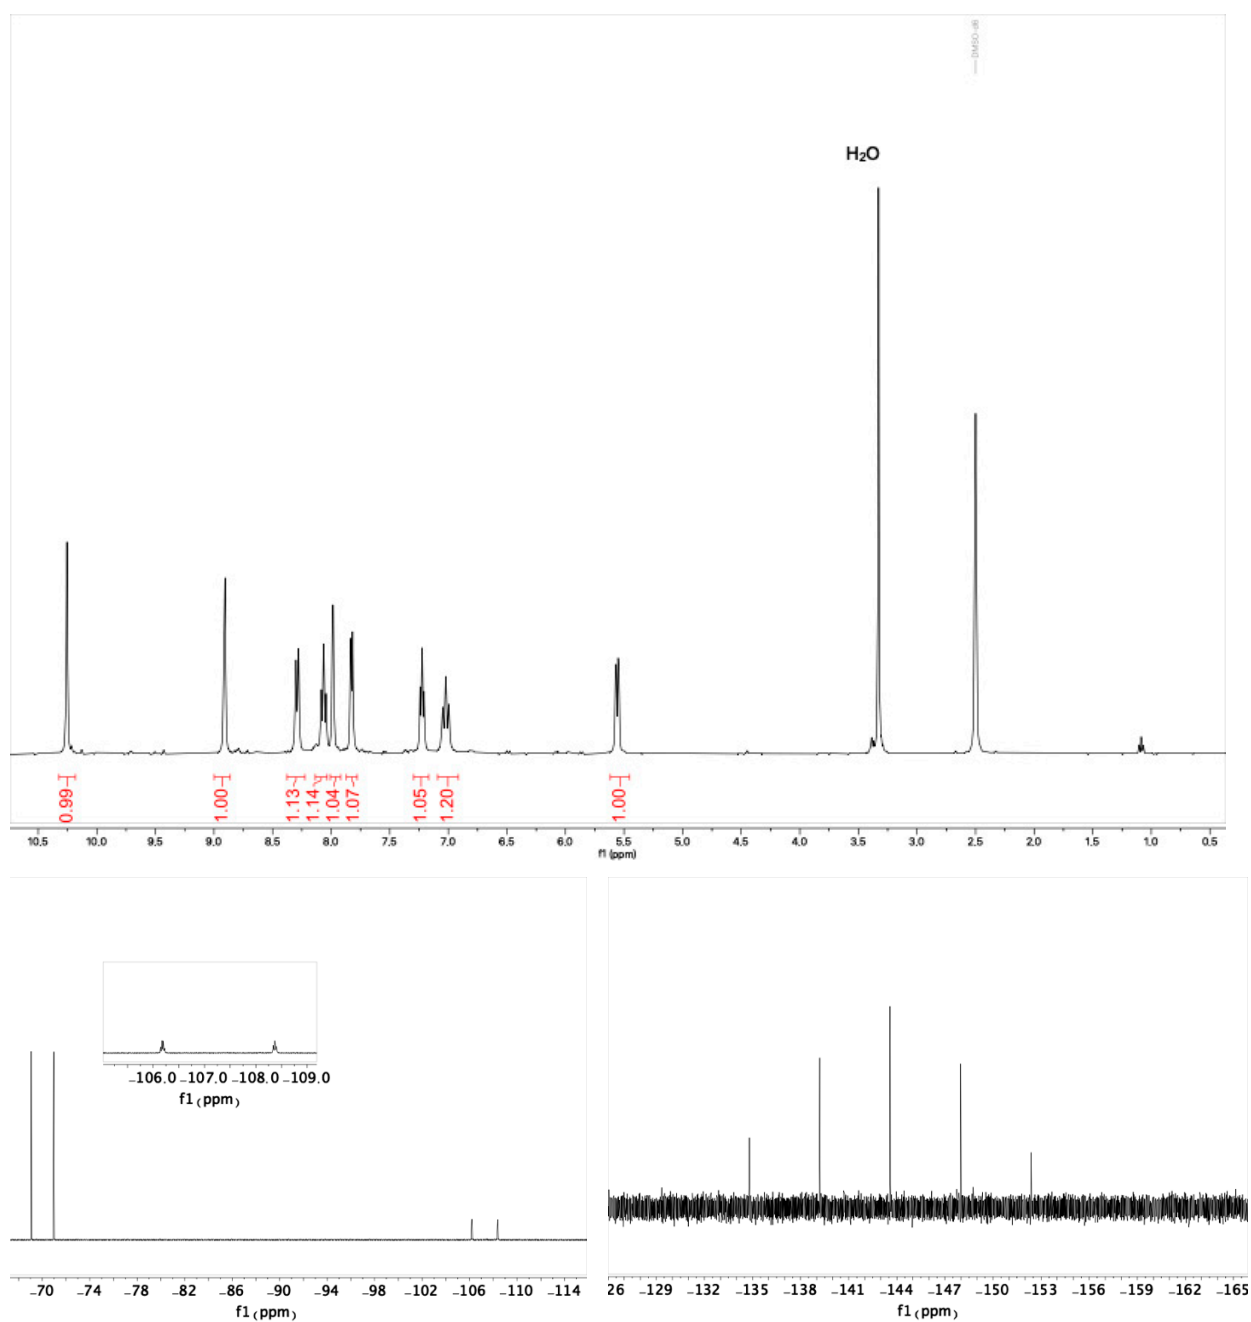

**Figure S10:** <sup>1</sup>H NMR (above), <sup>19</sup>F NMR (below, left), and <sup>31</sup>P NMR (below, right) of compound 6 in DMSO-d<sub>6</sub>.

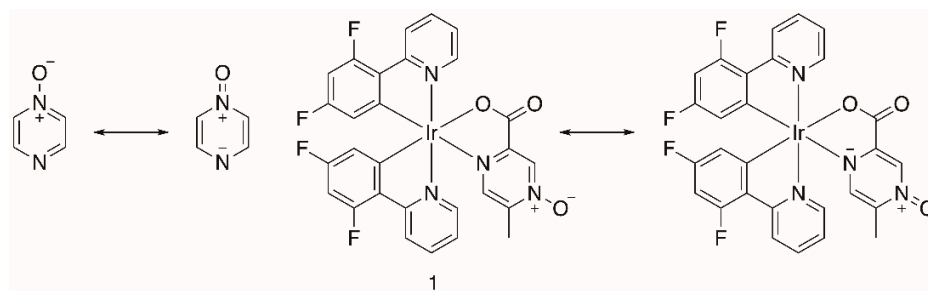

**Figure S11:** Resonance contributors of pyrazine *N*-oxide and compound **1**.

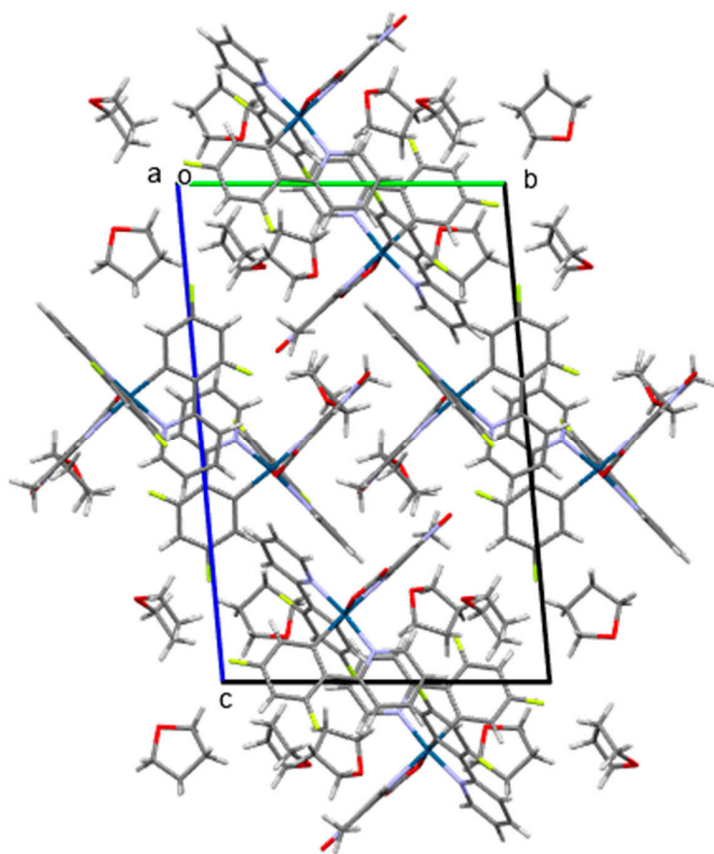

**Figure S12:** Packing diagram of  $1 \cdot 1.25(\text{THF})$ .

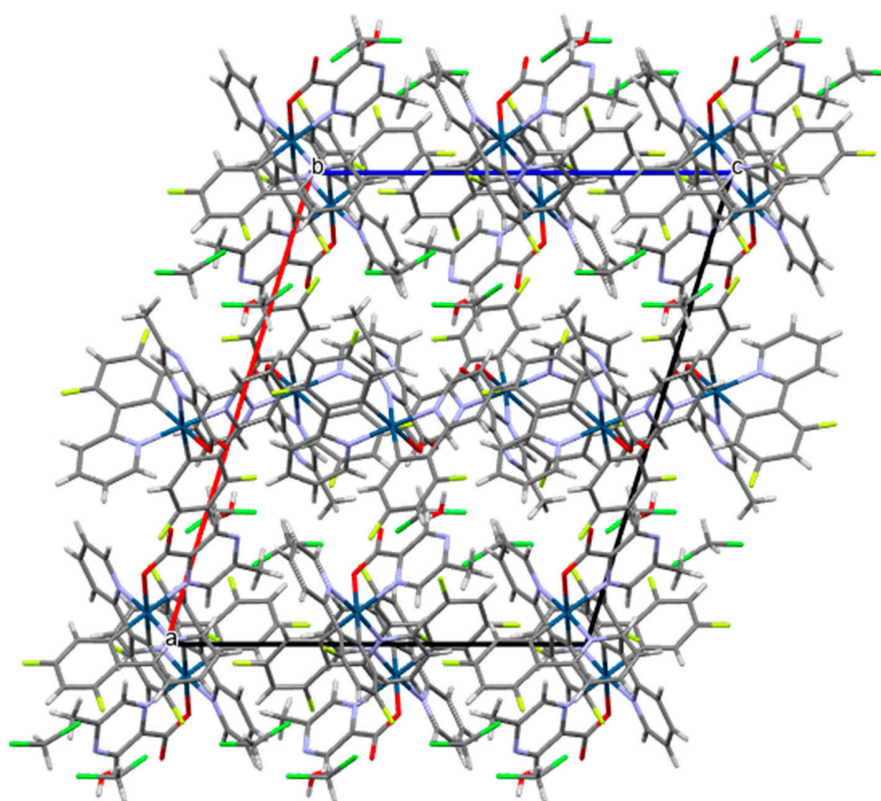

**Figure S13:** Packing diagram of  $2 \cdot 0.5(\text{DCM}), 0.5(\text{H}_2\text{O})$ .

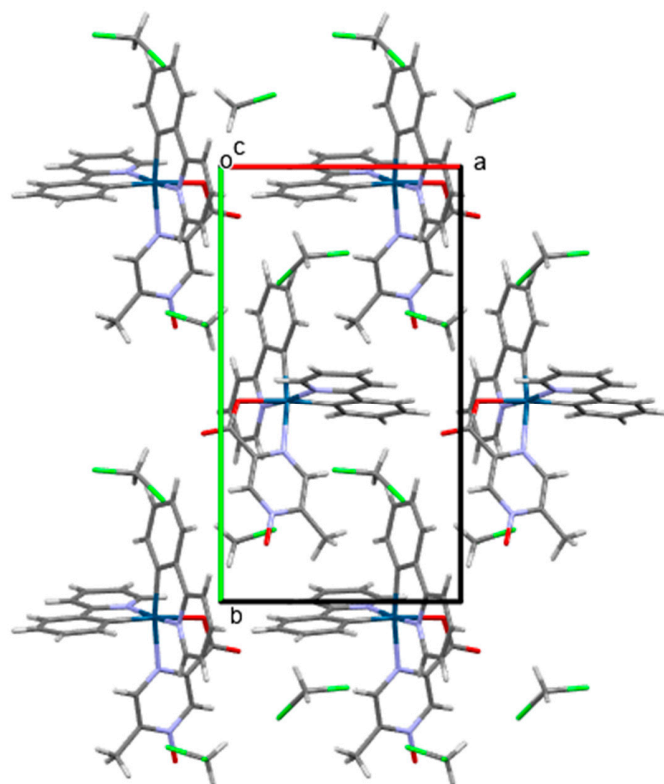

**Figure S14:** Packing diagram of  $3 \cdot 2(\text{DCM})$ .

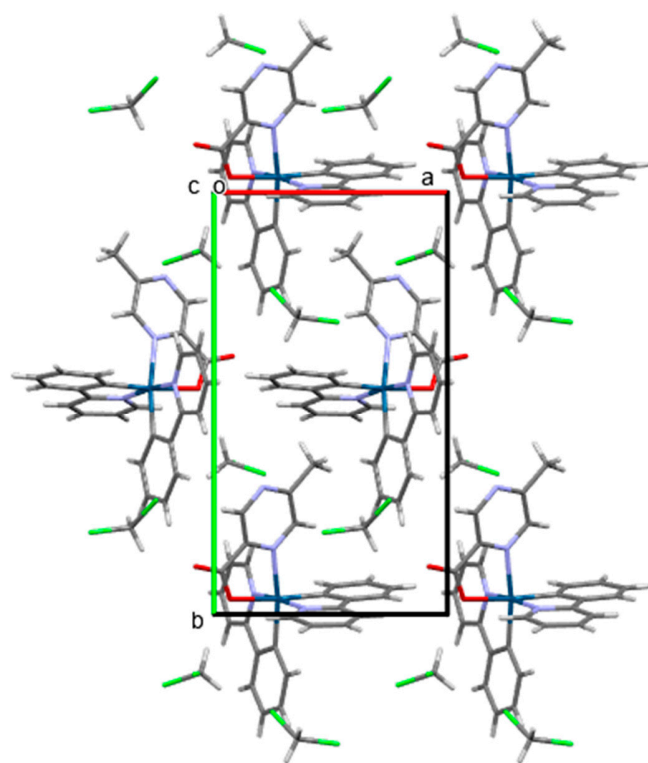

**Figure S15:** Packing diagram of  $4 \cdot 2(\text{DCM})$ .



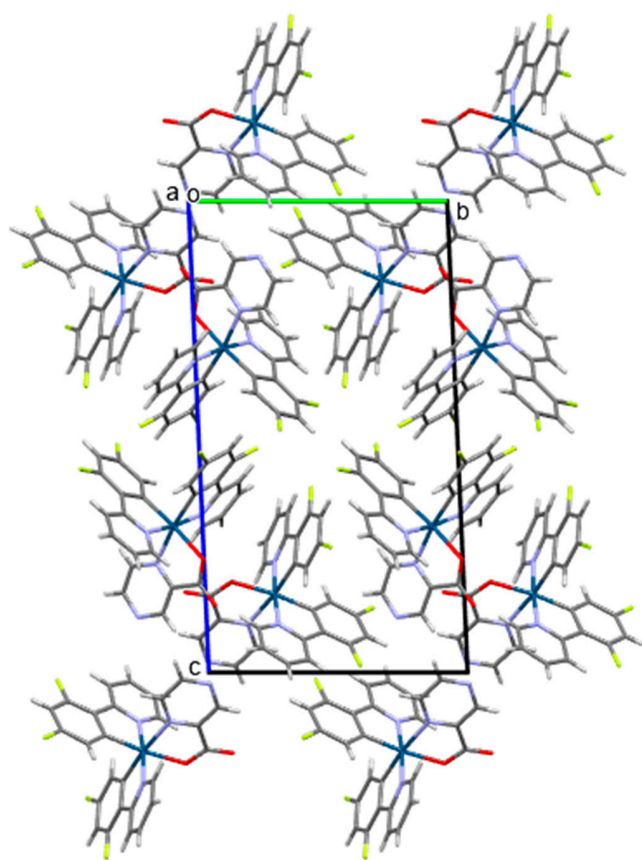

**Figure S16:** Packing diagram of 5.

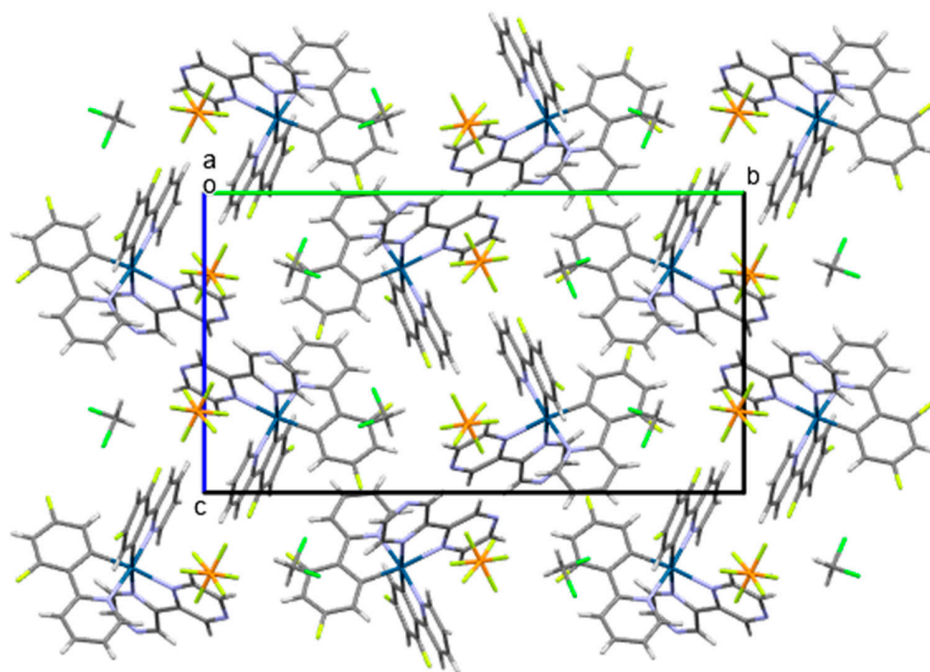

**Figure S17:** Packing diagram of **6 · (DCM)**.

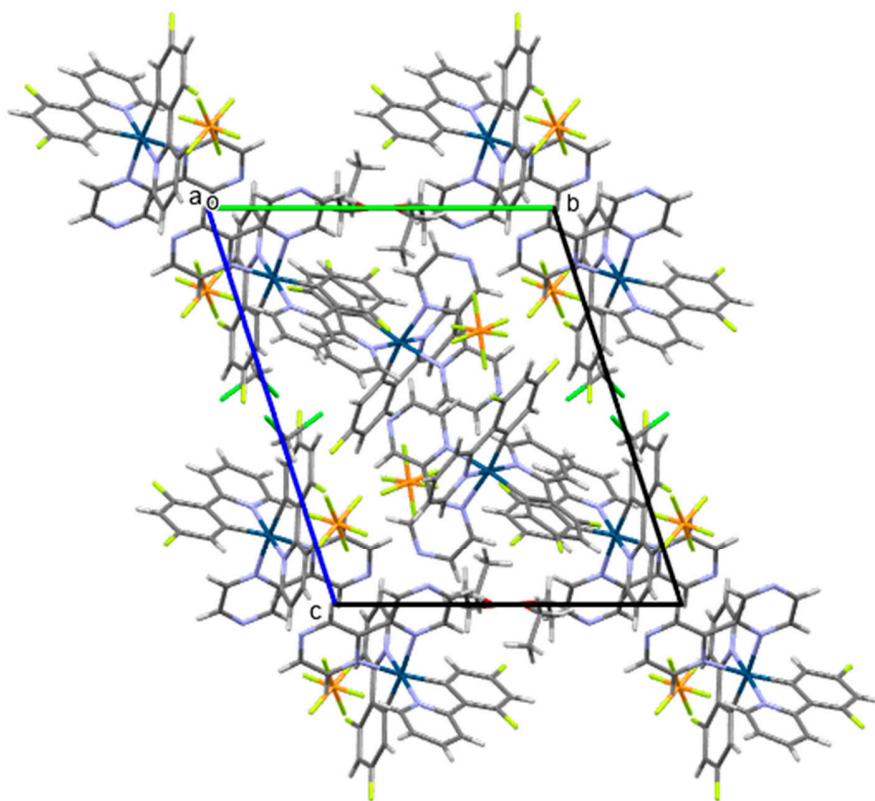

**Figure S18:** Packing diagram of  $6 \cdot 0.5(\text{DCM}), 0.5(\text{Et}_2\text{O})$ .

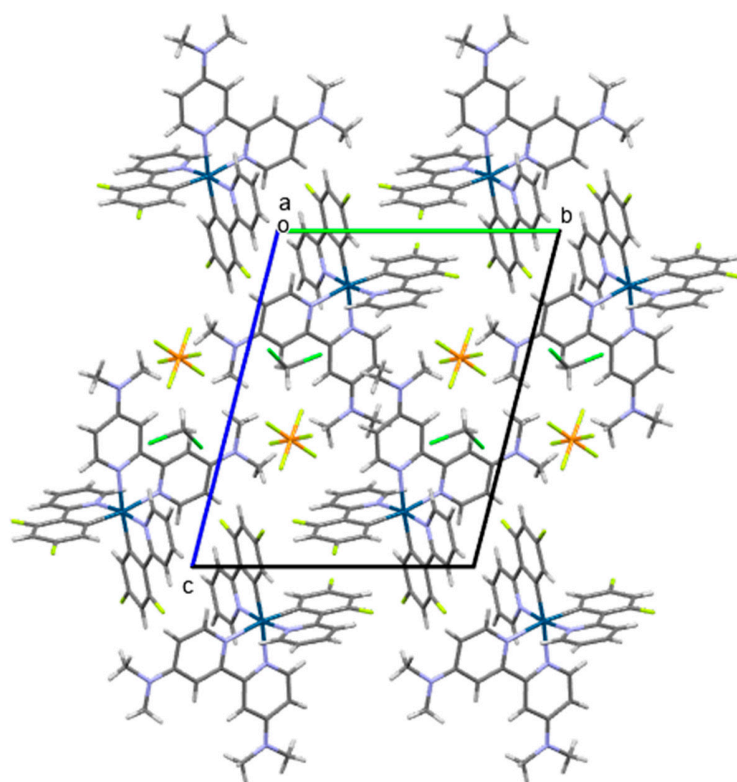

**Figure S19:** Packing diagram of 7 · (DCM).

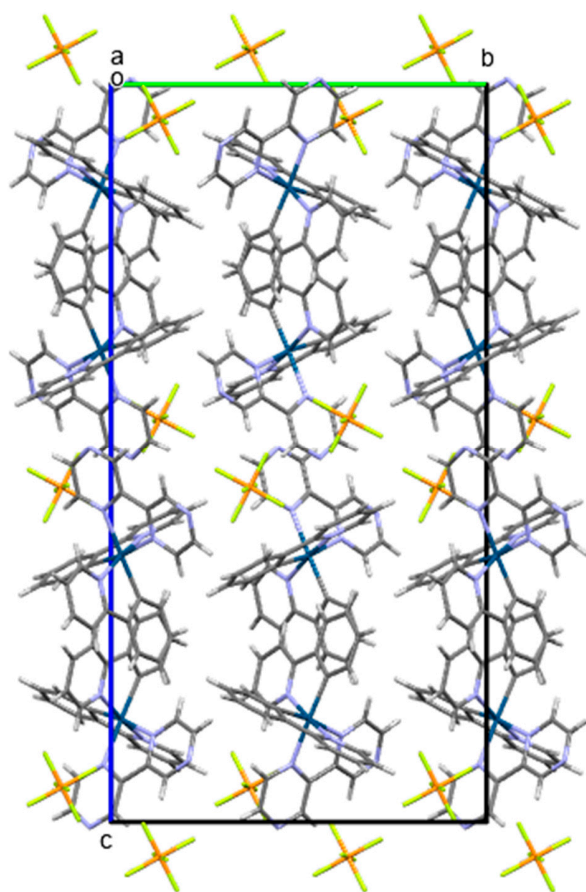

**Figure S20:** Packing diagram of **8**.
