# Supplementary material
Source: MDPI journal article supplement (https://www.mdpi.com/2073-4352/14/3/281)
Supplement: s1 [file s1]

Archive with 2 entries (2 files):
- Ir-NO-NN-combined-CIF.cif
- REV1-SI-3-8-24-Ir-N-oxides-etc.pdf
