# Supplementary material
Source: MDPI journal article supplement (https://www.mdpi.com/2073-4352/14/3/281)
Supplement: s1 [file s1 › Ir-NO-NN-combined-CIF.cif]

 
data_1
 
_audit_creation_method            'SHELXL-2016/6'
_shelx_SHELXL_version_number      '2016/6'
_chemical_name_systematic         ?
_chemical_name_common             ?
_chemical_melting_point           ?
_chemical_formula_moiety          ?
_chemical_formula_sum
 'C33 H27 F4 Ir N4 O4.25' 
_chemical_formula_weight          815.78

loop_
 _atom_type_symbol
 _atom_type_description
 _atom_type_scat_dispersion_real
 _atom_type_scat_dispersion_imag
 _atom_type_scat_source
 'C'  'C'   0.0033   0.0016
 'International Tables Vol C Tables 4.2.6.8 and 6.1.1.4'
 'H'  'H'   0.0000   0.0000
 'International Tables Vol C Tables 4.2.6.8 and 6.1.1.4'
 'F'  'F'   0.0171   0.0103
 'International Tables Vol C Tables 4.2.6.8 and 6.1.1.4'
 'Ir'  'Ir'  -1.4442   7.9887
 'International Tables Vol C Tables 4.2.6.8 and 6.1.1.4'
 'N'  'N'   0.0061   0.0033
 'International Tables Vol C Tables 4.2.6.8 and 6.1.1.4'
 'O'  'O'   0.0106   0.0060
 'International Tables Vol C Tables 4.2.6.8 and 6.1.1.4'
 
_space_group_crystal_system       triclinic
_space_group_IT_number            2
_space_group_name_H-M_alt         'P -1'
_space_group_name_Hall            '-P 1'
 
_shelx_space_group_comment
;
The symmetry employed for this shelxl refinement is uniquely defined
by the following loop, which should always be used as a source of
symmetry information in preference to the above space-group names.
They are only intended as comments.
;
 
loop_
 _space_group_symop_operation_xyz
 'x, y, z'
 '-x, -y, -z'
 
_cell_length_a                    12.0056(9)
_cell_length_b                    13.9227(10)
_cell_length_c                    21.5251(15)
_cell_angle_alpha                 84.548(3)
_cell_angle_beta                  81.768(3)
_cell_angle_gamma                 87.722(3)
_cell_volume                      3543.5(4)
_cell_formula_units_Z             4
_cell_measurement_temperature     100(2)
_cell_measurement_reflns_used      9670
_cell_measurement_theta_min        2.31
_cell_measurement_theta_max       30.07

_exptl_crystal_description       'block'
_exptl_crystal_colour            'orange'
_exptl_crystal_density_meas       .
_exptl_crystal_density_method     .
_exptl_crystal_density_diffrn     1.529          
_exptl_crystal_F_000              1600
_exptl_transmission_factor_min    .
_exptl_transmission_factor_max    .
_exptl_crystal_size_max           0.257
_exptl_crystal_size_mid           0.167
_exptl_crystal_size_min           0.123
_exptl_absorpt_coefficient_mu     3.829
_shelx_estimated_absorpt_T_min    0.439
_shelx_estimated_absorpt_T_max    0.650
_exptl_absorpt_correction_type    'multi-scan'
_exptl_absorpt_correction_T_min   0.7119
_exptl_absorpt_correction_T_max   1.0000
_exptl_absorpt_process_details    'SADABS, Bruker'
_exptl_absorpt_special_details    ?
_diffrn_ambient_temperature       100(2)
_diffrn_radiation_wavelength      0.71073
_diffrn_radiation_type            MoK\a
_diffrn_source                    'Incoatec I\mS'
_diffrn_measurement_device_type   'Bruker D8 Venture Photon 2'
_diffrn_measurement_method        '\f and \w scans'
_diffrn_detector_area_resol_mean  ?
_diffrn_reflns_number             248152
_diffrn_reflns_av_unetI/netI      0.0163
_diffrn_reflns_av_R_equivalents   0.0388
_diffrn_reflns_limit_h_min        -16
_diffrn_reflns_limit_h_max        16
_diffrn_reflns_limit_k_min        -19
_diffrn_reflns_limit_k_max        19
_diffrn_reflns_limit_l_min        -30
_diffrn_reflns_limit_l_max        30
_diffrn_reflns_theta_min          2.229
_diffrn_reflns_theta_max          30.090
_diffrn_reflns_theta_full         25.242
_diffrn_measured_fraction_theta_max   0.997
_diffrn_measured_fraction_theta_full  0.997
_diffrn_reflns_Laue_measured_fraction_max    0.997
_diffrn_reflns_Laue_measured_fraction_full   0.997
_diffrn_reflns_point_group_measured_fraction_max   0.997
_diffrn_reflns_point_group_measured_fraction_full  0.997
_reflns_number_total              20781
_reflns_number_gt                 18913
_reflns_threshold_expression      'I > 2\s(I)'
_reflns_Friedel_coverage          0.000
_reflns_Friedel_fraction_max      .
_reflns_Friedel_fraction_full     .
 
_reflns_special_details
;
 Reflections were merged by SHELXL according to the crystal
 class for the calculation of statistics and refinement.
 
 _reflns_Friedel_fraction is defined as the number of unique
 Friedel pairs measured divided by the number that would be
 possible theoretically, ignoring centric projections and
 systematic absences.
;
 
_computing_data_collection       'Bruker APEX3'
_computing_cell_refinement       'Bruker SAINT'
_computing_data_reduction        'Bruker SAINT'
_computing_structure_solution    'SHELXT 2014/5 (Sheldrick, 2014)'
_computing_structure_refinement  'SHELXL-2016/6 (Sheldrick, 2016)'
_computing_molecular_graphics    'Bruker SHELXTL'
_computing_publication_material  'Bruker SHELXTL'
_refine_special_details           ?
_refine_ls_structure_factor_coef  Fsqd
_refine_ls_matrix_type            full
_refine_ls_weighting_scheme       calc
_refine_ls_weighting_details
'w=1/[\s^2^(Fo^2^)+(0.0574P)^2^+17.2701P] where P=(Fo^2^+2Fc^2^)/3'
_atom_sites_solution_primary      dual
_atom_sites_solution_secondary    difmap
_atom_sites_solution_hydrogens    geom
_refine_ls_hydrogen_treatment     constr
_refine_ls_extinction_method      'SHELXL-2016/6 (Sheldrick 2016)'
_refine_ls_extinction_coef        0.00109(18)
_refine_ls_extinction_expression
 'Fc^*^=kFc[1+0.001xFc^2^\l^3^/sin(2\q)]^-1/4^'
_refine_ls_number_reflns          20781
_refine_ls_number_parameters      904
_refine_ls_number_restraints      224
_refine_ls_R_factor_all           0.0409
_refine_ls_R_factor_gt            0.0362
_refine_ls_wR_factor_ref          0.1205
_refine_ls_wR_factor_gt           0.1153
_refine_ls_goodness_of_fit_ref    1.109
_refine_ls_restrained_S_all       1.144
_refine_ls_shift/su_max           0.002
_refine_ls_shift/su_mean          0.000
 
loop_
 _atom_site_label
 _atom_site_type_symbol
 _atom_site_fract_x
 _atom_site_fract_y
 _atom_site_fract_z
 _atom_site_U_iso_or_equiv
 _atom_site_adp_type
 _atom_site_occupancy
 _atom_site_site_symmetry_order  
 _atom_site_calc_flag
 _atom_site_refinement_flags_posn
 _atom_site_refinement_flags_adp
 _atom_site_refinement_flags_occupancy
 _atom_site_disorder_assembly
 _atom_site_disorder_group
Ir1 Ir 0.81600(2) 0.79411(2) 0.42594(2) 0.01834(5) Uani 1 1 d . . . . .
Ir2 Ir 0.72724(2) 0.39126(2) 0.86405(2) 0.02475(6) Uani 1 1 d . . . . .
F1 F 0.8084(4) 1.0133(3) 0.20489(15) 0.0530(9) Uani 1 1 d . . . . .
F2 F 0.8688(3) 1.1686(2) 0.37967(16) 0.0474(8) Uani 1 1 d . . . . .
F3 F 0.3914(2) 0.8896(3) 0.5252(2) 0.0552(10) Uani 1 1 d . . . . .
F4 F 0.4373(2) 0.6890(2) 0.36021(16) 0.0398(7) Uani 1 1 d . . . . .
F5 F 1.0829(4) 0.4043(4) 0.9898(3) 0.099(2) Uani 1 1 d . . . . .
F6 F 1.1158(3) 0.2022(3) 0.82755(18) 0.0535(9) Uani 1 1 d . . . . .
F7 F 0.6131(5) 0.0298(3) 0.9577(2) 0.0790(14) Uani 1 1 d . . . . .
F8 F 0.5337(4) 0.2756(4) 1.09229(18) 0.0721(13) Uani 1 1 d . . . . .
O1 O 0.9967(2) 0.7792(2) 0.41363(14) 0.0229(5) Uani 1 1 d . . . . .
O2 O 1.1403(2) 0.7128(2) 0.46080(16) 0.0288(6) Uani 1 1 d . . . . .
O3 O 0.9474(3) 0.4691(3) 0.62026(18) 0.0406(8) Uani 1 1 d . . . . .
O4 O 0.5669(3) 0.4237(3) 0.83180(17) 0.0371(8) Uani 1 1 d . . . . .
O5 O 0.4703(5) 0.5310(4) 0.7757(3) 0.0695(15) Uani 1 1 d . . . . .
O6 O 0.7774(9) 0.7408(5) 0.6655(3) 0.119(3) Uani 1 1 d . U . . .
O7 O 0.3535(5) 0.2088(5) 0.9100(3) 0.0806(16) Uani 1 1 d D U . . .
N1 N 0.8455(3) 0.6738(2) 0.49175(17) 0.0223(6) Uani 1 1 d . . . . .
N2 N 0.9148(3) 0.5328(3) 0.57910(18) 0.0294(7) Uani 1 1 d . . . . .
N3 N 0.8332(3) 0.8947(2) 0.48690(16) 0.0196(6) Uani 1 1 d . . . . .
N4 N 0.7911(3) 0.7029(2) 0.36082(17) 0.0220(6) Uani 1 1 d . . . . .
N5 N 0.7598(4) 0.5117(3) 0.7962(2) 0.0402(9) Uani 1 1 d . U . . .
N6 N 0.7726(8) 0.6680(5) 0.7066(3) 0.0779(15) Uani 1 1 d . U . . .
N7 N 0.7838(3) 0.2989(3) 0.79765(17) 0.0269(7) Uani 1 1 d . . . . .
N8 N 0.6781(3) 0.4701(3) 0.93918(18) 0.0300(7) Uani 1 1 d . . . . .
C1 C 1.0400(3) 0.7215(3) 0.4543(2) 0.0221(7) Uani 1 1 d . . . . .
C2 C 0.9556(3) 0.6588(3) 0.49824(19) 0.0217(7) Uani 1 1 d . . . . .
C3 C 0.9907(4) 0.5898(3) 0.5409(2) 0.0289(8) Uani 1 1 d . . . . .
H3 H 1.068629 0.581353 0.544042 0.035 Uiso 1 1 calc R U . . .
C4 C 0.8024(4) 0.5436(3) 0.5718(2) 0.0297(8) Uani 1 1 d . . . . .
C5 C 0.7715(3) 0.6157(3) 0.5286(2) 0.0268(8) Uani 1 1 d . . . . .
H5 H 0.693934 0.624841 0.524682 0.032 Uiso 1 1 calc R U . . .
C6 C 0.7256(4) 0.4731(4) 0.6107(3) 0.0381(11) Uani 1 1 d . . . . .
H6A H 0.743121 0.408467 0.596908 0.057 Uiso 1 1 calc R U . . .
H6B H 0.647459 0.491369 0.605721 0.057 Uiso 1 1 calc R U . . .
H6C H 0.735490 0.473049 0.655111 0.057 Uiso 1 1 calc R U . . .
C7 C 0.8164(3) 0.9138(3) 0.36656(19) 0.0218(7) Uani 1 1 d . . . . .
C8 C 0.8052(4) 0.9203(3) 0.3025(2) 0.0286(8) Uani 1 1 d . . . . .
H8 H 0.789515 0.864585 0.283322 0.034 Uiso 1 1 calc R U . . .
C9 C 0.8173(5) 1.0084(4) 0.2674(2) 0.0373(10) Uani 1 1 d . . . . .
C10 C 0.8392(5) 1.0927(4) 0.2920(3) 0.0399(11) Uani 1 1 d . . . . .
H10 H 0.847552 1.152326 0.266598 0.048 Uiso 1 1 calc R U . . .
C11 C 0.8484(4) 1.0855(3) 0.3555(2) 0.0320(9) Uani 1 1 d . . . . .
C12 C 0.8374(3) 0.9992(3) 0.39394(19) 0.0229(7) Uani 1 1 d . . . . .
C13 C 0.8446(3) 0.9878(3) 0.46135(19) 0.0210(7) Uani 1 1 d . . . . .
C14 C 0.8591(3) 1.0610(3) 0.4996(2) 0.0254(7) Uani 1 1 d . . . . .
H14 H 0.868250 1.125752 0.481657 0.030 Uiso 1 1 calc R U . . .
C15 C 0.8600(4) 1.0388(3) 0.5636(2) 0.0299(8) Uani 1 1 d . . . . .
H15 H 0.869762 1.088021 0.589893 0.036 Uiso 1 1 calc R U . . .
C16 C 0.8463(4) 0.9434(3) 0.5891(2) 0.0317(9) Uani 1 1 d . . . . .
H16 H 0.846204 0.926660 0.632915 0.038 Uiso 1 1 calc R U . . .
C17 C 0.8331(4) 0.8740(3) 0.5495(2) 0.0269(8) Uani 1 1 d . . . . .
H17 H 0.823533 0.809024 0.566802 0.032 Uiso 1 1 calc R U . . .
C18 C 0.6482(3) 0.7975(3) 0.4374(2) 0.0217(7) Uani 1 1 d . . . . .
C19 C 0.5760(4) 0.8478(3) 0.4805(2) 0.0304(9) Uani 1 1 d . . . . .
H19 H 0.605435 0.886136 0.508247 0.037 Uiso 1 1 calc R U . . .
C20 C 0.4609(4) 0.8411(4) 0.4821(3) 0.0351(10) Uani 1 1 d . . . . .
C21 C 0.4107(4) 0.7872(3) 0.4427(3) 0.0330(9) Uani 1 1 d . . . . .
H21 H 0.331313 0.783582 0.445133 0.040 Uiso 1 1 calc R U . . .
C22 C 0.4839(3) 0.7398(3) 0.4004(2) 0.0280(8) Uani 1 1 d . . . . .
C23 C 0.6009(3) 0.7413(3) 0.3962(2) 0.0240(7) Uani 1 1 d . . . . .
C24 C 0.6812(3) 0.6888(3) 0.3534(2) 0.0239(7) Uani 1 1 d . . . . .
C25 C 0.6584(4) 0.6283(3) 0.3090(2) 0.0316(9) Uani 1 1 d . . . . .
H25 H 0.582620 0.618008 0.303784 0.038 Uiso 1 1 calc R U . . .
C26 C 0.7451(4) 0.5834(4) 0.2726(2) 0.0368(10) Uani 1 1 d . . . . .
H26 H 0.729519 0.542490 0.242196 0.044 Uiso 1 1 calc R U . . .
C27 C 0.8556(4) 0.5984(4) 0.2808(2) 0.0359(10) Uani 1 1 d . . . . .
H27 H 0.916511 0.567801 0.256227 0.043 Uiso 1 1 calc R U . . .
C28 C 0.8754(4) 0.6583(3) 0.3253(2) 0.0282(8) Uani 1 1 d . . . . .
H28 H 0.950882 0.668598 0.330960 0.034 Uiso 1 1 calc R U . . .
C29 C 0.5569(5) 0.4981(4) 0.7948(3) 0.0437(12) Uani 1 1 d . . . . .
C30 C 0.6668(6) 0.5497(4) 0.7725(2) 0.0471(11) Uani 1 1 d . U . . .
C31 C 0.6707(9) 0.6277(5) 0.7292(3) 0.0665(15) Uani 1 1 d . U . . .
H31 H 0.603679 0.653873 0.714805 0.080 Uiso 1 1 calc R U . . .
C32 C 0.8699(9) 0.6301(5) 0.7280(3) 0.0703(15) Uani 1 1 d . U . . .
C33 C 0.8599(7) 0.5520(4) 0.7744(3) 0.0544(13) Uani 1 1 d . U . . .
H33 H 0.925350 0.526772 0.791006 0.065 Uiso 1 1 calc R U . . .
C34 C 0.9792(10) 0.6755(7) 0.7036(4) 0.098(3) Uani 1 1 d . U . . .
H34A H 0.978210 0.702532 0.659988 0.146 Uiso 1 1 calc R U . . .
H34B H 1.040110 0.626720 0.705153 0.146 Uiso 1 1 calc R U . . .
H34C H 0.991344 0.727101 0.729669 0.146 Uiso 1 1 calc R U . . .
C35 C 0.8807(4) 0.3615(4) 0.8862(2) 0.0325(9) Uani 1 1 d . . . . .
C36 C 0.9294(5) 0.3992(5) 0.9336(3) 0.0500(16) Uani 1 1 d . . . . .
H36 H 0.889296 0.445047 0.958839 0.060 Uiso 1 1 calc R U . . .
C37 C 1.0368(5) 0.3683(6) 0.9429(4) 0.061(2) Uani 1 1 d . . . . .
C38 C 1.1019(5) 0.3034(6) 0.9082(4) 0.0580(19) Uani 1 1 d . . . . .
H38 H 1.176277 0.284951 0.915557 0.070 Uiso 1 1 calc R U . . .
C39 C 1.0519(4) 0.2672(4) 0.8620(3) 0.0434(13) Uani 1 1 d . . . . .
C40 C 0.9437(4) 0.2930(4) 0.8498(2) 0.0325(9) Uani 1 1 d . . . . .
C41 C 0.8866(4) 0.2560(3) 0.8014(2) 0.0284(8) Uani 1 1 d . . . . .
C42 C 0.9271(4) 0.1842(4) 0.7626(2) 0.0345(9) Uani 1 1 d . . . . .
H42 H 0.998182 0.153335 0.766102 0.041 Uiso 1 1 calc R U . . .
C43 C 0.8626(5) 0.1583(4) 0.7189(2) 0.0380(10) Uani 1 1 d . . . . .
H43 H 0.889429 0.109501 0.692081 0.046 Uiso 1 1 calc R U . . .
C44 C 0.7591(5) 0.2033(4) 0.7141(2) 0.0386(11) Uani 1 1 d . . . . .
H44 H 0.714422 0.186535 0.683922 0.046 Uiso 1 1 calc R U . . .
C45 C 0.7222(4) 0.2730(4) 0.7542(2) 0.0325(9) Uani 1 1 d . . . . .
H45 H 0.650975 0.303984 0.751225 0.039 Uiso 1 1 calc R U . . .
C46 C 0.6706(4) 0.2848(4) 0.9287(2) 0.0328(9) Uani 1 1 d . . . . .
C47 C 0.6658(5) 0.1879(4) 0.9195(3) 0.0424(12) Uani 1 1 d . . . . .
H47 H 0.696778 0.164859 0.880392 0.051 Uiso 1 1 calc R U . . .
C48 C 0.6153(6) 0.1250(5) 0.9682(3) 0.0559(16) Uani 1 1 d . . . . .
C49 C 0.5713(7) 0.1527(6) 1.0263(3) 0.0631(19) Uani 1 1 d . . . . .
H49 H 0.537424 0.107829 1.058935 0.076 Uiso 1 1 calc R U . . .
C50 C 0.5786(6) 0.2481(6) 1.0349(3) 0.0533(16) Uani 1 1 d . . . . .
C51 C 0.6275(4) 0.3161(4) 0.9883(2) 0.0373(10) Uani 1 1 d . . . . .
C52 C 0.6360(4) 0.4197(4) 0.9942(2) 0.0358(10) Uani 1 1 d . . . . .
C53 C 0.6073(4) 0.4677(5) 1.0487(2) 0.0462(14) Uani 1 1 d . . . . .
H53 H 0.578753 0.432443 1.087294 0.055 Uiso 1 1 calc R U . . .
C54 C 0.6202(5) 0.5651(5) 1.0468(3) 0.0502(15) Uani 1 1 d . . . . .
H54 H 0.600384 0.597444 1.083878 0.060 Uiso 1 1 calc R U . . .
C55 C 0.6623(4) 0.6168(5) 0.9904(3) 0.0447(13) Uani 1 1 d . . . . .
H55 H 0.671670 0.684563 0.988123 0.054 Uiso 1 1 calc R U . . .
C56 C 0.6901(4) 0.5662(4) 0.9378(2) 0.0355(10) Uani 1 1 d . . . . .
H56 H 0.718934 0.600707 0.899037 0.043 Uiso 1 1 calc R U . . .
C57 C 0.4015(10) 0.2362(8) 0.8429(5) 0.096(3) Uani 1 1 d D U . . .
H57A H 0.350587 0.285096 0.824388 0.115 Uiso 1 1 calc R U . . .
H57B H 0.474926 0.266624 0.842096 0.115 Uiso 1 1 calc R U . . .
C58 C 0.4174(10) 0.1579(8) 0.8047(6) 0.099(3) Uani 1 1 d D U . . .
H58A H 0.490138 0.161586 0.776468 0.119 Uiso 1 1 calc R U . . .
H58B H 0.355512 0.155566 0.779039 0.119 Uiso 1 1 calc R U . . .
C59 C 0.4162(10) 0.0724(8) 0.8534(5) 0.096(3) Uani 1 1 d D U . . .
H59A H 0.387619 0.014464 0.838133 0.115 Uiso 1 1 calc R U . . .
H59B H 0.492200 0.057410 0.865096 0.115 Uiso 1 1 calc R U . . .
C60 C 0.3384(10) 0.1064(7) 0.9068(5) 0.099(3) Uani 1 1 d D U . . .
H60A H 0.259726 0.095214 0.901122 0.119 Uiso 1 1 calc R U . . .
H60B H 0.353700 0.070032 0.946599 0.119 Uiso 1 1 calc R U . . .
C63 C 0.3295(11) 0.6496(12) 0.6218(9) 0.082(3) Uani 0.5 1 d D U P A 1
H63A H 0.306885 0.717482 0.610721 0.099 Uiso 0.5 1 calc R U P A 1
H63B H 0.290053 0.627277 0.663962 0.099 Uiso 0.5 1 calc R U P A 1
C62 C 0.3080(10) 0.5854(10) 0.5727(8) 0.072(3) Uani 0.5 1 d D U P A 1
H62A H 0.259298 0.532067 0.592597 0.086 Uiso 0.5 1 calc R U P A 1
H62B H 0.268609 0.622916 0.540584 0.086 Uiso 0.5 1 calc R U P A 1
C61 C 0.4129(10) 0.5467(11) 0.5432(9) 0.076(3) Uani 0.5 1 d D U P A 1
H61A H 0.417763 0.555220 0.496685 0.091 Uiso 0.5 1 calc R U P A 1
H61B H 0.421859 0.477152 0.556650 0.091 Uiso 0.5 1 calc R U P A 1
O8 O 0.4977(7) 0.6024(6) 0.5647(6) 0.067(2) Uani 0.5 1 d D U P A 1
C64 C 0.4466(11) 0.6380(12) 0.6189(8) 0.081(3) Uani 0.5 1 d D U P A 1
H64A H 0.478767 0.701299 0.622564 0.097 Uiso 0.5 1 calc R U P A 1
H64B H 0.463615 0.593749 0.655319 0.097 Uiso 0.5 1 calc R U P A 1
O9 O 0.7787(11) 0.7573(7) 0.8338(5) 0.078(3) Uani 0.5 1 d D U P B 2
C65 C 0.6924(15) 0.8314(11) 0.8298(8) 0.097(3) Uani 0.5 1 d D U P B 2
H65A H 0.706786 0.874159 0.790233 0.117 Uiso 0.5 1 calc R U P B 2
H65B H 0.616783 0.803793 0.833371 0.117 Uiso 0.5 1 calc R U P B 2
C66 C 0.7045(17) 0.8798(13) 0.8826(8) 0.104(3) Uani 0.5 1 d D U P B 2
H66A H 0.636826 0.866688 0.913926 0.125 Uiso 0.5 1 calc R U P B 2
H66B H 0.702248 0.949818 0.869214 0.125 Uiso 0.5 1 calc R U P B 2
C67 C 0.7992(18) 0.8614(14) 0.9144(8) 0.107(3) Uani 0.5 1 d D U P B 2
H67A H 0.784790 0.818067 0.953741 0.128 Uiso 0.5 1 calc R U P B 2
H67B H 0.838278 0.920043 0.921086 0.128 Uiso 0.5 1 calc R U P B 2
C68 C 0.8497(15) 0.8132(13) 0.8596(8) 0.100(3) Uani 0.5 1 d D U P B 2
H68A H 0.881192 0.863023 0.826526 0.120 Uiso 0.5 1 calc R U P B 2
H68B H 0.913322 0.771608 0.871674 0.120 Uiso 0.5 1 calc R U P B 2
O10 O 1.1335(14) 0.6027(12) 0.8167(9) 0.113(4) Uani 0.5 1 d D U P C 3
C69 C 1.2281(19) 0.6680(14) 0.8114(12) 0.100(4) Uani 0.5 1 d D U P C 3
H69A H 1.296975 0.630364 0.819726 0.121 Uiso 0.5 1 calc R U P C 3
H69B H 1.241961 0.699954 0.767994 0.121 Uiso 0.5 1 calc R U P C 3
C70 C 1.204(2) 0.7406(17) 0.8561(11) 0.108(5) Uani 0.5 1 d D U P C 3
H70A H 1.272063 0.754338 0.874289 0.130 Uiso 0.5 1 calc R U P C 3
H70B H 1.175094 0.801426 0.835541 0.130 Uiso 0.5 1 calc R U P C 3
C71 C 1.119(2) 0.6988(16) 0.9041(13) 0.120(5) Uani 0.5 1 d D U P C 3
H71A H 1.047652 0.737185 0.905772 0.144 Uiso 0.5 1 calc R U P C 3
H71B H 1.144525 0.694141 0.946112 0.144 Uiso 0.5 1 calc R U P C 3
C72 C 1.106(3) 0.6032(18) 0.8840(10) 0.117(5) Uani 0.5 1 d D U P C 3
H72A H 1.155169 0.555925 0.905046 0.140 Uiso 0.5 1 calc R U P C 3
H72B H 1.026853 0.583320 0.896969 0.140 Uiso 0.5 1 calc R U P C 3
 
loop_
 _atom_site_aniso_label
 _atom_site_aniso_U_11
 _atom_site_aniso_U_22
 _atom_site_aniso_U_33
 _atom_site_aniso_U_23
 _atom_site_aniso_U_13
 _atom_site_aniso_U_12
Ir1 0.01329(7) 0.01787(8) 0.02425(8) -0.00323(5) -0.00283(5) -0.00123(4)
Ir2 0.02081(8) 0.02988(9) 0.02297(8) -0.00445(6) 0.00079(5) -0.00238(6)
F1 0.084(3) 0.0491(19) 0.0273(15) 0.0031(13) -0.0159(16) -0.0007(18)
F2 0.079(2) 0.0219(13) 0.0422(17) 0.0007(12) -0.0124(16) -0.0139(14)
F3 0.0190(13) 0.076(3) 0.075(2) -0.038(2) 0.0003(14) 0.0075(14)
F4 0.0225(12) 0.0447(16) 0.0572(19) -0.0142(14) -0.0141(12) -0.0084(11)
F5 0.054(2) 0.136(5) 0.134(5) -0.106(4) -0.056(3) 0.039(3)
F6 0.0407(17) 0.067(2) 0.059(2) -0.0352(18) -0.0135(15) 0.0224(16)
F7 0.112(4) 0.050(2) 0.073(3) 0.020(2) -0.015(3) -0.031(2)
F8 0.074(3) 0.101(4) 0.0315(18) 0.008(2) 0.0156(18) -0.009(3)
O1 0.0164(12) 0.0247(13) 0.0278(14) -0.0034(11) -0.0027(10) -0.0028(10)
O2 0.0164(13) 0.0309(15) 0.0408(17) -0.0086(13) -0.0071(12) 0.0006(11)
O3 0.051(2) 0.0302(17) 0.0415(19) 0.0072(14) -0.0153(17) 0.0003(15)
O4 0.0284(16) 0.053(2) 0.0299(16) -0.0083(15) -0.0035(13) 0.0046(15)
O5 0.074(3) 0.073(3) 0.070(3) -0.013(3) -0.042(3) 0.024(3)
O6 0.227(7) 0.073(4) 0.055(3) 0.025(3) -0.021(4) -0.052(5)
O7 0.064(3) 0.073(3) 0.106(4) -0.004(3) -0.023(3) 0.003(3)
N1 0.0181(14) 0.0195(14) 0.0294(16) -0.0037(12) -0.0027(12) -0.0012(11)
N2 0.037(2) 0.0214(16) 0.0298(18) -0.0011(13) -0.0072(15) -0.0010(14)
N3 0.0142(13) 0.0201(14) 0.0253(15) -0.0045(12) -0.0030(11) -0.0026(10)
N4 0.0178(14) 0.0213(14) 0.0280(16) -0.0065(12) -0.0045(12) -0.0007(11)
N5 0.061(2) 0.0312(18) 0.0259(17) -0.0076(14) 0.0080(16) -0.0071(17)
N6 0.141(4) 0.051(3) 0.040(2) 0.001(2) -0.004(3) -0.030(3)
N7 0.0267(17) 0.0297(17) 0.0241(16) -0.0036(13) -0.0005(13) -0.0058(13)
N8 0.0208(16) 0.041(2) 0.0279(17) -0.0091(15) -0.0007(13) 0.0015(14)
C1 0.0166(16) 0.0194(16) 0.0320(19) -0.0083(14) -0.0052(14) -0.0004(12)
C2 0.0189(16) 0.0199(16) 0.0270(18) -0.0050(13) -0.0042(13) 0.0002(13)
C3 0.028(2) 0.0268(19) 0.035(2) -0.0091(16) -0.0103(16) 0.0022(15)
C4 0.031(2) 0.0234(18) 0.033(2) -0.0011(16) 0.0004(17) -0.0028(15)
C5 0.0197(17) 0.0230(18) 0.036(2) -0.0013(15) 0.0007(15) -0.0010(14)
C6 0.037(2) 0.028(2) 0.043(3) 0.0034(19) 0.010(2) -0.0025(18)
C7 0.0177(16) 0.0221(17) 0.0256(18) -0.0021(14) -0.0036(13) 0.0011(13)
C8 0.029(2) 0.031(2) 0.0274(19) -0.0057(16) -0.0067(16) 0.0037(16)
C9 0.048(3) 0.039(2) 0.025(2) 0.0015(18) -0.0084(19) 0.001(2)
C10 0.054(3) 0.030(2) 0.035(2) 0.0046(19) -0.008(2) -0.004(2)
C11 0.040(2) 0.0229(19) 0.033(2) -0.0011(16) -0.0043(18) -0.0041(17)
C12 0.0198(16) 0.0218(17) 0.0271(18) -0.0021(14) -0.0031(14) -0.0011(13)
C13 0.0136(14) 0.0209(16) 0.0283(18) -0.0034(14) -0.0013(13) -0.0013(12)
C14 0.0220(17) 0.0230(17) 0.032(2) -0.0068(15) -0.0038(15) -0.0019(14)
C15 0.030(2) 0.030(2) 0.032(2) -0.0107(17) -0.0046(17) -0.0038(16)
C16 0.036(2) 0.034(2) 0.027(2) -0.0072(17) -0.0065(17) -0.0038(18)
C17 0.029(2) 0.0253(18) 0.0265(19) -0.0022(15) -0.0035(15) -0.0036(15)
C18 0.0130(15) 0.0207(16) 0.0319(19) -0.0029(14) -0.0048(13) -0.0014(12)
C19 0.0186(18) 0.033(2) 0.041(2) -0.0110(18) -0.0046(16) 0.0008(15)
C20 0.0183(18) 0.039(2) 0.048(3) -0.010(2) -0.0007(17) 0.0035(16)
C21 0.0156(17) 0.035(2) 0.048(3) -0.0017(19) -0.0050(17) -0.0013(15)
C22 0.0182(17) 0.0273(19) 0.040(2) -0.0025(17) -0.0100(16) -0.0042(14)
C23 0.0165(16) 0.0233(17) 0.033(2) -0.0025(15) -0.0065(14) -0.0024(13)
C24 0.0204(17) 0.0227(17) 0.0306(19) -0.0052(14) -0.0078(14) -0.0021(13)
C25 0.031(2) 0.031(2) 0.037(2) -0.0102(18) -0.0132(18) -0.0041(17)
C26 0.040(3) 0.037(2) 0.037(2) -0.016(2) -0.012(2) -0.001(2)
C27 0.033(2) 0.038(2) 0.039(2) -0.017(2) -0.0043(19) 0.0029(19)
C28 0.0229(18) 0.030(2) 0.033(2) -0.0098(16) -0.0032(15) 0.0031(15)
C29 0.053(3) 0.049(3) 0.033(2) -0.014(2) -0.015(2) 0.012(2)
C30 0.079(3) 0.036(2) 0.0267(19) -0.0046(17) -0.008(2) -0.002(2)
C31 0.115(4) 0.047(3) 0.038(2) 0.001(2) -0.015(3) -0.010(3)
C32 0.118(4) 0.050(3) 0.039(2) -0.014(2) 0.020(3) -0.041(3)
C33 0.082(3) 0.040(2) 0.036(2) -0.0138(19) 0.022(2) -0.024(2)
C34 0.149(7) 0.079(5) 0.057(4) -0.022(4) 0.040(4) -0.075(5)
C35 0.025(2) 0.038(2) 0.036(2) -0.0158(19) -0.0031(17) 0.0007(17)
C36 0.030(2) 0.063(4) 0.066(4) -0.041(3) -0.016(2) 0.011(2)
C37 0.037(3) 0.081(5) 0.078(5) -0.053(4) -0.025(3) 0.012(3)
C38 0.035(3) 0.075(4) 0.073(4) -0.044(4) -0.022(3) 0.015(3)
C39 0.031(2) 0.054(3) 0.049(3) -0.027(3) -0.009(2) 0.012(2)
C40 0.027(2) 0.037(2) 0.035(2) -0.0134(18) -0.0031(17) 0.0003(17)
C41 0.029(2) 0.030(2) 0.0258(19) -0.0053(16) 0.0004(15) -0.0027(16)
C42 0.036(2) 0.035(2) 0.033(2) -0.0097(18) 0.0006(18) 0.0013(18)
C43 0.050(3) 0.036(2) 0.027(2) -0.0091(18) -0.002(2) -0.001(2)
C44 0.050(3) 0.041(3) 0.028(2) -0.0076(19) -0.010(2) -0.002(2)
C45 0.033(2) 0.039(2) 0.026(2) -0.0037(17) -0.0052(17) -0.0033(18)
C46 0.028(2) 0.042(2) 0.028(2) 0.0017(18) -0.0059(16) -0.0050(18)
C47 0.047(3) 0.041(3) 0.039(3) 0.005(2) -0.007(2) -0.010(2)
C48 0.064(4) 0.048(3) 0.054(4) 0.015(3) -0.013(3) -0.021(3)
C49 0.069(4) 0.072(5) 0.043(3) 0.022(3) -0.003(3) -0.023(4)
C50 0.050(3) 0.076(4) 0.030(3) 0.010(3) 0.000(2) -0.010(3)
C51 0.030(2) 0.054(3) 0.025(2) 0.003(2) -0.0016(17) -0.004(2)
C52 0.0208(19) 0.059(3) 0.027(2) -0.007(2) 0.0000(15) 0.0031(19)
C53 0.028(2) 0.084(4) 0.027(2) -0.015(2) -0.0008(18) 0.004(2)
C54 0.029(2) 0.086(5) 0.039(3) -0.032(3) -0.002(2) 0.007(3)
C55 0.027(2) 0.061(3) 0.049(3) -0.028(3) -0.003(2) 0.004(2)
C56 0.028(2) 0.042(3) 0.037(2) -0.014(2) 0.0007(18) 0.0009(18)
C57 0.080(5) 0.091(5) 0.115(6) 0.006(5) -0.016(5) -0.009(5)
C58 0.092(5) 0.108(6) 0.102(6) -0.014(5) -0.025(5) 0.004(5)
C59 0.096(6) 0.092(5) 0.109(6) -0.027(5) -0.040(5) 0.017(5)
C60 0.092(5) 0.100(6) 0.107(6) -0.004(5) -0.031(5) 0.018(5)
C63 0.048(4) 0.065(5) 0.121(7) 0.036(5) 0.004(4) -0.003(4)
C62 0.036(4) 0.062(5) 0.109(7) 0.044(5) -0.017(4) -0.013(4)
C61 0.044(4) 0.062(4) 0.113(7) 0.035(5) -0.008(4) -0.008(4)
O8 0.024(3) 0.047(4) 0.118(6) 0.030(4) 0.004(3) -0.001(3)
C64 0.051(4) 0.061(5) 0.120(7) 0.033(5) 0.003(4) -0.001(4)
O9 0.124(8) 0.043(4) 0.063(5) -0.012(4) 0.005(5) -0.008(5)
C65 0.139(8) 0.068(5) 0.080(6) -0.009(5) 0.007(6) -0.008(5)
C66 0.143(8) 0.077(5) 0.086(6) -0.011(5) 0.006(6) -0.010(5)
C67 0.145(9) 0.081(6) 0.089(6) -0.013(5) 0.006(6) -0.012(6)
C68 0.142(8) 0.070(5) 0.082(6) -0.013(4) 0.008(5) -0.011(5)
O10 0.110(9) 0.098(8) 0.125(9) -0.029(7) 0.006(8) 0.016(7)
C69 0.110(10) 0.078(8) 0.114(10) -0.015(8) -0.020(8) 0.021(7)
C70 0.115(10) 0.088(9) 0.122(10) -0.002(8) -0.026(9) 0.003(8)
C71 0.125(11) 0.102(9) 0.132(11) -0.014(9) -0.011(9) 0.005(9)
C72 0.122(10) 0.100(9) 0.128(10) -0.016(9) -0.012(9) 0.001(8)
 
_geom_special_details
;
 All esds (except the esd in the dihedral angle between two l.s. planes)
 are estimated using the full covariance matrix.  The cell esds are taken
 into account individually in the estimation of esds in distances, angles
 and torsion angles; correlations between esds in cell parameters are only
 used when they are defined by crystal symmetry.  An approximate (isotropic)
 treatment of cell esds is used for estimating esds involving l.s. planes.
;
 
loop_
 _geom_bond_atom_site_label_1
 _geom_bond_atom_site_label_2
 _geom_bond_distance
 _geom_bond_site_symmetry_2
 _geom_bond_publ_flag
Ir1 C18 1.993(4) . ?
Ir1 C7 2.001(4) . ?
Ir1 N4 2.039(3) . ?
Ir1 N3 2.043(3) . ?
Ir1 N1 2.141(3) . ?
Ir1 O1 2.151(3) . ?
Ir2 C35 1.987(5) . ?
Ir2 C46 2.003(5) . ?
Ir2 N7 2.040(4) . ?
Ir2 N8 2.045(4) . ?
Ir2 N5 2.126(4) . ?
Ir2 O4 2.156(4) . ?
F1 C9 1.361(6) . ?
F2 C11 1.358(5) . ?
F3 C20 1.364(6) . ?
F4 C22 1.360(5) . ?
F5 C37 1.363(7) . ?
F6 C39 1.367(6) . ?
F7 C48 1.368(8) . ?
F8 C50 1.359(7) . ?
O1 C1 1.283(5) . ?
O2 C1 1.232(5) . ?
O3 N2 1.283(5) . ?
O4 C29 1.258(7) . ?
O5 C29 1.227(7) . ?
O6 N6 1.279(8) . ?
O7 C60 1.453(10) . ?
O7 C57 1.496(10) . ?
N1 C5 1.344(5) . ?
N1 C2 1.354(5) . ?
N2 C3 1.362(6) . ?
N2 C4 1.381(6) . ?
N3 C17 1.350(5) . ?
N3 C13 1.364(5) . ?
N4 C28 1.347(5) . ?
N4 C24 1.375(5) . ?
N5 C33 1.349(8) . ?
N5 C30 1.361(9) . ?
N6 C31 1.371(12) . ?
N6 C32 1.383(13) . ?
N7 C45 1.355(6) . ?
N7 C41 1.359(6) . ?
N8 C56 1.348(7) . ?
N8 C52 1.360(6) . ?
C1 C2 1.524(6) . ?
C2 C3 1.362(6) . ?
C3 H3 0.9500 . ?
C4 C5 1.380(6) . ?
C4 C6 1.486(6) . ?
C5 H5 0.9500 . ?
C6 H6A 0.9800 . ?
C6 H6B 0.9800 . ?
C6 H6C 0.9800 . ?
C7 C8 1.399(6) . ?
C7 C12 1.423(5) . ?
C8 C9 1.379(7) . ?
C8 H8 0.9500 . ?
C9 C10 1.382(7) . ?
C10 C11 1.381(7) . ?
C10 H10 0.9500 . ?
C11 C12 1.392(6) . ?
C12 C13 1.459(6) . ?
C13 C14 1.400(5) . ?
C14 C15 1.385(6) . ?
C14 H14 0.9500 . ?
C15 C16 1.395(7) . ?
C15 H15 0.9500 . ?
C16 C17 1.376(6) . ?
C16 H16 0.9500 . ?
C17 H17 0.9500 . ?
C18 C19 1.396(6) . ?
C18 C23 1.425(5) . ?
C19 C20 1.384(6) . ?
C19 H19 0.9500 . ?
C20 C21 1.396(7) . ?
C21 C22 1.370(7) . ?
C21 H21 0.9500 . ?
C22 C23 1.395(5) . ?
C23 C24 1.459(6) . ?
C24 C25 1.395(6) . ?
C25 C26 1.377(7) . ?
C25 H25 0.9500 . ?
C26 C27 1.390(7) . ?
C26 H26 0.9500 . ?
C27 C28 1.379(6) . ?
C27 H27 0.9500 . ?
C28 H28 0.9500 . ?
C29 C30 1.522(10) . ?
C30 C31 1.360(9) . ?
C31 H31 0.9500 . ?
C32 C33 1.402(10) . ?
C32 C34 1.483(11) . ?
C33 H33 0.9500 . ?
C34 H34A 0.9800 . ?
C34 H34B 0.9800 . ?
C34 H34C 0.9800 . ?
C35 C36 1.397(7) . ?
C35 C40 1.417(6) . ?
C36 C37 1.379(8) . ?
C36 H36 0.9500 . ?
C37 C38 1.374(8) . ?
C38 C39 1.376(8) . ?
C38 H38 0.9500 . ?
C39 C40 1.389(7) . ?
C40 C41 1.469(6) . ?
C41 C42 1.393(6) . ?
C42 C43 1.382(7) . ?
C42 H42 0.9500 . ?
C43 C44 1.382(8) . ?
C43 H43 0.9500 . ?
C44 C45 1.377(7) . ?
C44 H44 0.9500 . ?
C45 H45 0.9500 . ?
C46 C47 1.387(8) . ?
C46 C51 1.415(7) . ?
C47 C48 1.385(8) . ?
C47 H47 0.9500 . ?
C48 C49 1.370(11) . ?
C49 C50 1.366(11) . ?
C49 H49 0.9500 . ?
C50 C51 1.394(8) . ?
C51 C52 1.469(8) . ?
C52 C53 1.400(7) . ?
C53 C54 1.367(10) . ?
C53 H53 0.9500 . ?
C54 C55 1.390(10) . ?
C54 H54 0.9500 . ?
C55 C56 1.384(7) . ?
C55 H55 0.9500 . ?
C56 H56 0.9500 . ?
C57 C58 1.418(11) . ?
C57 H57A 0.9900 . ?
C57 H57B 0.9900 . ?
C58 C59 1.509(11) . ?
C58 H58A 0.9900 . ?
C58 H58B 0.9900 . ?
C59 C60 1.476(11) . ?
C59 H59A 0.9900 . ?
C59 H59B 0.9900 . ?
C60 H60A 0.9900 . ?
C60 H60B 0.9900 . ?
C63 C64 1.402(14) . ?
C63 C62 1.501(15) . ?
C63 H63A 0.9900 . ?
C63 H63B 0.9900 . ?
C62 C61 1.436(14) . ?
C62 H62A 0.9900 . ?
C62 H62B 0.9900 . ?
C61 O8 1.455(14) . ?
C61 H61A 0.9900 . ?
C61 H61B 0.9900 . ?
O8 C64 1.366(14) . ?
C64 H64A 0.9900 . ?
C64 H64B 0.9900 . ?
O9 C68 1.382(11) . ?
O9 C65 1.438(11) . ?
C65 C66 1.401(11) . ?
C65 H65A 0.9900 . ?
C65 H65B 0.9900 . ?
C66 C67 1.412(12) . ?
C66 C68 1.96(2) . ?
C66 H66A 0.9900 . ?
C66 H66B 0.9900 . ?
C67 C68 1.457(12) . ?
C67 H67A 0.9900 . ?
C67 H67B 0.9900 . ?
C68 H68A 0.9900 . ?
C68 H68B 0.9900 . ?
O10 C72 1.440(17) . ?
O10 C69 1.468(17) . ?
C69 C70 1.456(17) . ?
C69 H69A 0.9900 . ?
C69 H69B 0.9900 . ?
C70 C71 1.440(17) . ?
C70 H70A 0.9900 . ?
C70 H70B 0.9900 . ?
C71 C72 1.460(17) . ?
C71 H71A 0.9900 . ?
C71 H71B 0.9900 . ?
C72 H72A 0.9900 . ?
C72 H72B 0.9900 . ?
 
loop_
 _geom_angle_atom_site_label_1
 _geom_angle_atom_site_label_2
 _geom_angle_atom_site_label_3
 _geom_angle
 _geom_angle_site_symmetry_1
 _geom_angle_site_symmetry_3
 _geom_angle_publ_flag
C18 Ir1 C7 89.68(16) . . ?
C18 Ir1 N4 80.69(15) . . ?
C7 Ir1 N4 95.06(15) . . ?
C18 Ir1 N3 96.63(14) . . ?
C7 Ir1 N3 80.55(15) . . ?
N4 Ir1 N3 174.92(13) . . ?
C18 Ir1 N1 99.98(15) . . ?
C7 Ir1 N1 169.52(14) . . ?
N4 Ir1 N1 90.55(13) . . ?
N3 Ir1 N1 94.18(13) . . ?
C18 Ir1 O1 175.83(13) . . ?
C7 Ir1 O1 93.54(13) . . ?
N4 Ir1 O1 96.36(12) . . ?
N3 Ir1 O1 86.53(12) . . ?
N1 Ir1 O1 77.02(12) . . ?
C35 Ir2 C46 88.2(2) . . ?
C35 Ir2 N7 80.57(17) . . ?
C46 Ir2 N7 93.39(18) . . ?
C35 Ir2 N8 94.35(17) . . ?
C46 Ir2 N8 80.58(19) . . ?
N7 Ir2 N8 172.29(16) . . ?
C35 Ir2 N5 100.6(2) . . ?
C46 Ir2 N5 170.8(2) . . ?
N7 Ir2 N5 90.66(15) . . ?
N8 Ir2 N5 96.00(16) . . ?
C35 Ir2 O4 175.17(16) . . ?
C46 Ir2 O4 95.11(17) . . ?
N7 Ir2 O4 95.67(15) . . ?
N8 Ir2 O4 89.69(14) . . ?
N5 Ir2 O4 76.28(18) . . ?
C1 O1 Ir1 116.8(2) . . ?
C29 O4 Ir2 118.6(4) . . ?
C60 O7 C57 99.6(8) . . ?
C5 N1 C2 116.9(4) . . ?
C5 N1 Ir1 129.7(3) . . ?
C2 N1 Ir1 113.4(3) . . ?
O3 N2 C3 120.6(4) . . ?
O3 N2 C4 120.6(4) . . ?
C3 N2 C4 118.7(4) . . ?
C17 N3 C13 119.6(3) . . ?
C17 N3 Ir1 124.0(3) . . ?
C13 N3 Ir1 116.4(3) . . ?
C28 N4 C24 119.9(4) . . ?
C28 N4 Ir1 123.6(3) . . ?
C24 N4 Ir1 116.5(3) . . ?
C33 N5 C30 118.2(6) . . ?
C33 N5 Ir2 127.7(5) . . ?
C30 N5 Ir2 114.1(4) . . ?
O6 N6 C31 119.7(10) . . ?
O6 N6 C32 120.0(9) . . ?
C31 N6 C32 120.4(6) . . ?
C45 N7 C41 119.2(4) . . ?
C45 N7 Ir2 124.2(3) . . ?
C41 N7 Ir2 116.5(3) . . ?
C56 N8 C52 119.3(4) . . ?
C56 N8 Ir2 124.2(3) . . ?
C52 N8 Ir2 116.4(3) . . ?
O2 C1 O1 126.8(4) . . ?
O2 C1 C2 118.6(4) . . ?
O1 C1 C2 114.7(3) . . ?
N1 C2 C3 122.2(4) . . ?
N1 C2 C1 116.9(3) . . ?
C3 C2 C1 120.9(4) . . ?
N2 C3 C2 120.5(4) . . ?
N2 C3 H3 119.8 . . ?
C2 C3 H3 119.8 . . ?
C5 C4 N2 118.2(4) . . ?
C5 C4 C6 125.8(4) . . ?
N2 C4 C6 116.0(4) . . ?
N1 C5 C4 123.4(4) . . ?
N1 C5 H5 118.3 . . ?
C4 C5 H5 118.3 . . ?
C4 C6 H6A 109.5 . . ?
C4 C6 H6B 109.5 . . ?
H6A C6 H6B 109.5 . . ?
C4 C6 H6C 109.5 . . ?
H6A C6 H6C 109.5 . . ?
H6B C6 H6C 109.5 . . ?
C8 C7 C12 118.7(4) . . ?
C8 C7 Ir1 127.4(3) . . ?
C12 C7 Ir1 113.8(3) . . ?
C9 C8 C7 119.4(4) . . ?
C9 C8 H8 120.3 . . ?
C7 C8 H8 120.3 . . ?
F1 C9 C8 118.7(5) . . ?
F1 C9 C10 117.5(5) . . ?
C8 C9 C10 123.7(5) . . ?
C11 C10 C9 116.3(4) . . ?
C11 C10 H10 121.9 . . ?
C9 C10 H10 121.9 . . ?
F2 C11 C10 116.2(4) . . ?
F2 C11 C12 120.5(4) . . ?
C10 C11 C12 123.3(4) . . ?
C11 C12 C7 118.6(4) . . ?
C11 C12 C13 125.5(4) . . ?
C7 C12 C13 115.9(4) . . ?
N3 C13 C14 120.1(4) . . ?
N3 C13 C12 113.0(3) . . ?
C14 C13 C12 126.8(4) . . ?
C15 C14 C13 119.8(4) . . ?
C15 C14 H14 120.1 . . ?
C13 C14 H14 120.1 . . ?
C14 C15 C16 119.3(4) . . ?
C14 C15 H15 120.4 . . ?
C16 C15 H15 120.4 . . ?
C17 C16 C15 118.7(4) . . ?
C17 C16 H16 120.7 . . ?
C15 C16 H16 120.7 . . ?
N3 C17 C16 122.5(4) . . ?
N3 C17 H17 118.7 . . ?
C16 C17 H17 118.7 . . ?
C19 C18 C23 118.9(4) . . ?
C19 C18 Ir1 126.9(3) . . ?
C23 C18 Ir1 114.2(3) . . ?
C20 C19 C18 119.0(4) . . ?
C20 C19 H19 120.5 . . ?
C18 C19 H19 120.5 . . ?
F3 C20 C19 118.3(4) . . ?
F3 C20 C21 117.5(4) . . ?
C19 C20 C21 124.2(4) . . ?
C22 C21 C20 115.3(4) . . ?
C22 C21 H21 122.3 . . ?
C20 C21 H21 122.3 . . ?
F4 C22 C21 116.6(4) . . ?
F4 C22 C23 119.2(4) . . ?
C21 C22 C23 124.3(4) . . ?
C22 C23 C18 118.4(4) . . ?
C22 C23 C24 125.7(4) . . ?
C18 C23 C24 115.9(3) . . ?
N4 C24 C25 119.4(4) . . ?
N4 C24 C23 112.6(3) . . ?
C25 C24 C23 128.0(4) . . ?
C26 C25 C24 120.3(4) . . ?
C26 C25 H25 119.8 . . ?
C24 C25 H25 119.8 . . ?
C25 C26 C27 119.5(4) . . ?
C25 C26 H26 120.3 . . ?
C27 C26 H26 120.3 . . ?
C28 C27 C26 118.8(4) . . ?
C28 C27 H27 120.6 . . ?
C26 C27 H27 120.6 . . ?
N4 C28 C27 122.1(4) . . ?
N4 C28 H28 119.0 . . ?
C27 C28 H28 119.0 . . ?
O5 C29 O4 127.1(7) . . ?
O5 C29 C30 119.0(6) . . ?
O4 C29 C30 113.9(5) . . ?
C31 C30 N5 122.6(7) . . ?
C31 C30 C29 120.6(7) . . ?
N5 C30 C29 116.7(5) . . ?
C30 C31 N6 119.1(9) . . ?
C30 C31 H31 120.5 . . ?
N6 C31 H31 120.5 . . ?
N6 C32 C33 117.9(7) . . ?
N6 C32 C34 119.6(8) . . ?
C33 C32 C34 122.5(10) . . ?
N5 C33 C32 121.8(8) . . ?
N5 C33 H33 119.1 . . ?
C32 C33 H33 119.1 . . ?
C32 C34 H34A 109.5 . . ?
C32 C34 H34B 109.5 . . ?
H34A C34 H34B 109.5 . . ?
C32 C34 H34C 109.5 . . ?
H34A C34 H34C 109.5 . . ?
H34B C34 H34C 109.5 . . ?
C36 C35 C40 118.6(4) . . ?
C36 C35 Ir2 126.9(4) . . ?
C40 C35 Ir2 114.5(3) . . ?
C37 C36 C35 118.6(5) . . ?
C37 C36 H36 120.7 . . ?
C35 C36 H36 120.7 . . ?
F5 C37 C38 116.9(5) . . ?
F5 C37 C36 118.2(5) . . ?
C38 C37 C36 124.9(5) . . ?
C37 C38 C39 115.3(5) . . ?
C37 C38 H38 122.3 . . ?
C39 C38 H38 122.3 . . ?
F6 C39 C38 115.7(5) . . ?
F6 C39 C40 120.5(5) . . ?
C38 C39 C40 123.8(5) . . ?
C39 C40 C35 118.7(4) . . ?
C39 C40 C41 125.8(4) . . ?
C35 C40 C41 115.5(4) . . ?
N7 C41 C42 120.7(4) . . ?
N7 C41 C40 112.7(4) . . ?
C42 C41 C40 126.6(4) . . ?
C43 C42 C41 119.2(5) . . ?
C43 C42 H42 120.4 . . ?
C41 C42 H42 120.4 . . ?
C44 C43 C42 120.1(5) . . ?
C44 C43 H43 119.9 . . ?
C42 C43 H43 119.9 . . ?
C45 C44 C43 118.4(5) . . ?
C45 C44 H44 120.8 . . ?
C43 C44 H44 120.8 . . ?
N7 C45 C44 122.4(5) . . ?
N7 C45 H45 118.8 . . ?
C44 C45 H45 118.8 . . ?
C47 C46 C51 119.1(5) . . ?
C47 C46 Ir2 126.8(4) . . ?
C51 C46 Ir2 114.1(4) . . ?
C48 C47 C46 119.1(6) . . ?
C48 C47 H47 120.5 . . ?
C46 C47 H47 120.5 . . ?
F7 C48 C49 118.9(6) . . ?
F7 C48 C47 117.5(7) . . ?
C49 C48 C47 123.6(7) . . ?
C50 C49 C48 116.5(6) . . ?
C50 C49 H49 121.8 . . ?
C48 C49 H49 121.8 . . ?
F8 C50 C49 116.4(6) . . ?
F8 C50 C51 120.1(7) . . ?
C49 C50 C51 123.5(6) . . ?
C50 C51 C46 118.2(6) . . ?
C50 C51 C52 126.1(5) . . ?
C46 C51 C52 115.7(4) . . ?
N8 C52 C53 119.7(5) . . ?
N8 C52 C51 113.1(4) . . ?
C53 C52 C51 127.1(5) . . ?
C54 C53 C52 120.3(6) . . ?
C54 C53 H53 119.8 . . ?
C52 C53 H53 119.8 . . ?
C53 C54 C55 119.9(5) . . ?
C53 C54 H54 120.0 . . ?
C55 C54 H54 120.0 . . ?
C56 C55 C54 117.7(6) . . ?
C56 C55 H55 121.2 . . ?
C54 C55 H55 121.2 . . ?
N8 C56 C55 123.0(5) . . ?
N8 C56 H56 118.5 . . ?
C55 C56 H56 118.5 . . ?
C58 C57 O7 114.2(9) . . ?
C58 C57 H57A 108.7 . . ?
O7 C57 H57A 108.7 . . ?
C58 C57 H57B 108.7 . . ?
O7 C57 H57B 108.7 . . ?
H57A C57 H57B 107.6 . . ?
C57 C58 C59 101.9(9) . . ?
C57 C58 H58A 111.4 . . ?
C59 C58 H58A 111.4 . . ?
C57 C58 H58B 111.4 . . ?
C59 C58 H58B 111.4 . . ?
H58A C58 H58B 109.3 . . ?
C60 C59 C58 102.2(9) . . ?
C60 C59 H59A 111.3 . . ?
C58 C59 H59A 111.3 . . ?
C60 C59 H59B 111.3 . . ?
C58 C59 H59B 111.3 . . ?
H59A C59 H59B 109.2 . . ?
O7 C60 C59 109.5(9) . . ?
O7 C60 H60A 109.8 . . ?
C59 C60 H60A 109.8 . . ?
O7 C60 H60B 109.8 . . ?
C59 C60 H60B 109.8 . . ?
H60A C60 H60B 108.2 . . ?
C64 C63 C62 100.7(13) . . ?
C64 C63 H63A 111.6 . . ?
C62 C63 H63A 111.6 . . ?
C64 C63 H63B 111.6 . . ?
C62 C63 H63B 111.6 . . ?
H63A C63 H63B 109.4 . . ?
C61 C62 C63 109.8(12) . . ?
C61 C62 H62A 109.7 . . ?
C63 C62 H62A 109.7 . . ?
C61 C62 H62B 109.7 . . ?
C63 C62 H62B 109.7 . . ?
H62A C62 H62B 108.2 . . ?
C62 C61 O8 104.0(12) . . ?
C62 C61 H61A 111.0 . . ?
O8 C61 H61A 111.0 . . ?
C62 C61 H61B 111.0 . . ?
O8 C61 H61B 111.0 . . ?
H61A C61 H61B 109.0 . . ?
C64 O8 C61 105.7(12) . . ?
O8 C64 C63 113.5(14) . . ?
O8 C64 H64A 108.9 . . ?
C63 C64 H64A 108.9 . . ?
O8 C64 H64B 108.9 . . ?
C63 C64 H64B 108.9 . . ?
H64A C64 H64B 107.7 . . ?
C68 O9 C65 94.9(12) . . ?
C66 C65 O9 100.3(13) . . ?
C66 C65 H65A 111.7 . . ?
O9 C65 H65A 111.7 . . ?
C66 C65 H65B 111.7 . . ?
O9 C65 H65B 111.7 . . ?
H65A C65 H65B 109.5 . . ?
C65 C66 C67 120.8(15) . . ?
C65 C66 C68 74.2(10) . . ?
C67 C66 C68 47.8(8) . . ?
C65 C66 H66A 107.1 . . ?
C67 C66 H66A 107.1 . . ?
C68 C66 H66A 135.6 . . ?
C65 C66 H66B 107.1 . . ?
C67 C66 H66B 107.1 . . ?
C68 C66 H66B 115.3 . . ?
H66A C66 H66B 106.8 . . ?
C66 C67 C68 86.3(13) . . ?
C66 C67 H67A 114.3 . . ?
C68 C67 H67A 114.3 . . ?
C66 C67 H67B 114.3 . . ?
C68 C67 H67B 114.3 . . ?
H67A C67 H67B 111.4 . . ?
O9 C68 C67 116.0(13) . . ?
O9 C68 C66 79.3(10) . . ?
C67 C68 C66 45.9(7) . . ?
O9 C68 H68A 108.3 . . ?
C67 C68 H68A 108.3 . . ?
C66 C68 H68A 96.7 . . ?
O9 C68 H68B 108.3 . . ?
C67 C68 H68B 108.3 . . ?
C66 C68 H68B 150.2 . . ?
H68A C68 H68B 107.4 . . ?
C72 O10 C69 95.0(18) . . ?
C70 C69 O10 110.4(18) . . ?
C70 C69 H69A 109.6 . . ?
O10 C69 H69A 109.6 . . ?
C70 C69 H69B 109.6 . . ?
O10 C69 H69B 109.6 . . ?
H69A C69 H69B 108.1 . . ?
C71 C70 C69 105(2) . . ?
C71 C70 H70A 110.8 . . ?
C69 C70 H70A 110.8 . . ?
C71 C70 H70B 110.8 . . ?
C69 C70 H70B 110.8 . . ?
H70A C70 H70B 108.9 . . ?
C70 C71 C72 103(2) . . ?
C70 C71 H71A 111.1 . . ?
C72 C71 H71A 111.1 . . ?
C70 C71 H71B 111.1 . . ?
C72 C71 H71B 111.1 . . ?
H71A C71 H71B 109.1 . . ?
O10 C72 C71 111(2) . . ?
O10 C72 H72A 109.4 . . ?
C71 C72 H72A 109.4 . . ?
O10 C72 H72B 109.4 . . ?
C71 C72 H72B 109.4 . . ?
H72A C72 H72B 108.0 . . ?
 
loop_
 _geom_torsion_atom_site_label_1
 _geom_torsion_atom_site_label_2
 _geom_torsion_atom_site_label_3
 _geom_torsion_atom_site_label_4
 _geom_torsion
 _geom_torsion_site_symmetry_1
 _geom_torsion_site_symmetry_2
 _geom_torsion_site_symmetry_3
 _geom_torsion_site_symmetry_4
 _geom_torsion_publ_flag
Ir1 O1 C1 O2 -169.4(3) . . . . ?
Ir1 O1 C1 C2 10.5(4) . . . . ?
C5 N1 C2 C3 -1.4(6) . . . . ?
Ir1 N1 C2 C3 175.6(3) . . . . ?
C5 N1 C2 C1 177.2(4) . . . . ?
Ir1 N1 C2 C1 -5.8(4) . . . . ?
O2 C1 C2 N1 176.8(4) . . . . ?
O1 C1 C2 N1 -3.1(5) . . . . ?
O2 C1 C2 C3 -4.5(6) . . . . ?
O1 C1 C2 C3 175.5(4) . . . . ?
O3 N2 C3 C2 -178.5(4) . . . . ?
C4 N2 C3 C2 2.8(6) . . . . ?
N1 C2 C3 N2 -0.1(6) . . . . ?
C1 C2 C3 N2 -178.7(4) . . . . ?
O3 N2 C4 C5 177.5(4) . . . . ?
C3 N2 C4 C5 -3.8(6) . . . . ?
O3 N2 C4 C6 -4.3(6) . . . . ?
C3 N2 C4 C6 174.4(4) . . . . ?
C2 N1 C5 C4 0.2(6) . . . . ?
Ir1 N1 C5 C4 -176.2(3) . . . . ?
N2 C4 C5 N1 2.4(7) . . . . ?
C6 C4 C5 N1 -175.7(4) . . . . ?
C12 C7 C8 C9 1.4(6) . . . . ?
Ir1 C7 C8 C9 -174.4(4) . . . . ?
C7 C8 C9 F1 178.7(4) . . . . ?
C7 C8 C9 C10 -0.6(8) . . . . ?
F1 C9 C10 C11 -179.6(5) . . . . ?
C8 C9 C10 C11 -0.4(9) . . . . ?
C9 C10 C11 F2 -179.4(5) . . . . ?
C9 C10 C11 C12 0.5(8) . . . . ?
F2 C11 C12 C7 -179.8(4) . . . . ?
C10 C11 C12 C7 0.4(7) . . . . ?
F2 C11 C12 C13 0.8(7) . . . . ?
C10 C11 C12 C13 -179.0(5) . . . . ?
C8 C7 C12 C11 -1.4(6) . . . . ?
Ir1 C7 C12 C11 175.0(3) . . . . ?
C8 C7 C12 C13 178.1(4) . . . . ?
Ir1 C7 C12 C13 -5.5(4) . . . . ?
C17 N3 C13 C14 1.6(5) . . . . ?
Ir1 N3 C13 C14 -178.7(3) . . . . ?
C17 N3 C13 C12 -177.1(3) . . . . ?
Ir1 N3 C13 C12 2.5(4) . . . . ?
C11 C12 C13 N3 -178.6(4) . . . . ?
C7 C12 C13 N3 1.9(5) . . . . ?
C11 C12 C13 C14 2.7(7) . . . . ?
C7 C12 C13 C14 -176.7(4) . . . . ?
N3 C13 C14 C15 -1.0(6) . . . . ?
C12 C13 C14 C15 177.5(4) . . . . ?
C13 C14 C15 C16 0.0(7) . . . . ?
C14 C15 C16 C17 0.4(7) . . . . ?
C13 N3 C17 C16 -1.3(6) . . . . ?
Ir1 N3 C17 C16 179.1(3) . . . . ?
C15 C16 C17 N3 0.2(7) . . . . ?
C23 C18 C19 C20 0.3(7) . . . . ?
Ir1 C18 C19 C20 -179.4(4) . . . . ?
C18 C19 C20 F3 179.0(5) . . . . ?
C18 C19 C20 C21 -0.5(8) . . . . ?
F3 C20 C21 C22 -180.0(5) . . . . ?
C19 C20 C21 C22 -0.4(8) . . . . ?
C20 C21 C22 F4 -178.2(4) . . . . ?
C20 C21 C22 C23 1.6(7) . . . . ?
F4 C22 C23 C18 178.0(4) . . . . ?
C21 C22 C23 C18 -1.8(7) . . . . ?
F4 C22 C23 C24 -2.7(7) . . . . ?
C21 C22 C23 C24 177.5(4) . . . . ?
C19 C18 C23 C22 0.7(6) . . . . ?
Ir1 C18 C23 C22 -179.5(3) . . . . ?
C19 C18 C23 C24 -178.7(4) . . . . ?
Ir1 C18 C23 C24 1.1(5) . . . . ?
C28 N4 C24 C25 0.1(6) . . . . ?
Ir1 N4 C24 C25 179.1(3) . . . . ?
C28 N4 C24 C23 179.1(4) . . . . ?
Ir1 N4 C24 C23 -1.8(5) . . . . ?
C22 C23 C24 N4 -178.9(4) . . . . ?
C18 C23 C24 N4 0.4(5) . . . . ?
C22 C23 C24 C25 0.1(7) . . . . ?
C18 C23 C24 C25 179.4(4) . . . . ?
N4 C24 C25 C26 -0.4(7) . . . . ?
C23 C24 C25 C26 -179.3(5) . . . . ?
C24 C25 C26 C27 0.4(8) . . . . ?
C25 C26 C27 C28 -0.2(8) . . . . ?
C24 N4 C28 C27 0.1(7) . . . . ?
Ir1 N4 C28 C27 -178.8(4) . . . . ?
C26 C27 C28 N4 -0.1(8) . . . . ?
Ir2 O4 C29 O5 -174.1(5) . . . . ?
Ir2 O4 C29 C30 6.2(6) . . . . ?
C33 N5 C30 C31 -1.6(8) . . . . ?
Ir2 N5 C30 C31 179.2(5) . . . . ?
C33 N5 C30 C29 175.9(4) . . . . ?
Ir2 N5 C30 C29 -3.3(6) . . . . ?
O5 C29 C30 C31 -4.0(8) . . . . ?
O4 C29 C30 C31 175.7(5) . . . . ?
O5 C29 C30 N5 178.4(5) . . . . ?
O4 C29 C30 N5 -1.8(7) . . . . ?
N5 C30 C31 N6 2.3(10) . . . . ?
C29 C30 C31 N6 -175.1(6) . . . . ?
O6 N6 C31 C30 179.4(7) . . . . ?
C32 N6 C31 C30 -0.5(10) . . . . ?
O6 N6 C32 C33 178.2(6) . . . . ?
C31 N6 C32 C33 -1.9(10) . . . . ?
O6 N6 C32 C34 0.8(10) . . . . ?
C31 N6 C32 C34 -179.2(6) . . . . ?
C30 N5 C33 C32 -0.9(8) . . . . ?
Ir2 N5 C33 C32 178.2(4) . . . . ?
N6 C32 C33 N5 2.6(9) . . . . ?
C34 C32 C33 N5 179.9(6) . . . . ?
C40 C35 C36 C37 0.2(10) . . . . ?
Ir2 C35 C36 C37 178.7(6) . . . . ?
C35 C36 C37 F5 -179.0(7) . . . . ?
C35 C36 C37 C38 1.0(14) . . . . ?
F5 C37 C38 C39 178.8(8) . . . . ?
C36 C37 C38 C39 -1.3(14) . . . . ?
C37 C38 C39 F6 -179.6(7) . . . . ?
C37 C38 C39 C40 0.3(12) . . . . ?
F6 C39 C40 C35 -179.3(5) . . . . ?
C38 C39 C40 C35 0.8(10) . . . . ?
F6 C39 C40 C41 0.2(9) . . . . ?
C38 C39 C40 C41 -179.6(7) . . . . ?
C36 C35 C40 C39 -1.0(8) . . . . ?
Ir2 C35 C40 C39 -179.7(5) . . . . ?
C36 C35 C40 C41 179.4(5) . . . . ?
Ir2 C35 C40 C41 0.7(6) . . . . ?
C45 N7 C41 C42 -2.0(7) . . . . ?
Ir2 N7 C41 C42 173.1(4) . . . . ?
C45 N7 C41 C40 178.9(4) . . . . ?
Ir2 N7 C41 C40 -6.1(5) . . . . ?
C39 C40 C41 N7 -176.0(5) . . . . ?
C35 C40 C41 N7 3.5(6) . . . . ?
C39 C40 C41 C42 4.9(9) . . . . ?
C35 C40 C41 C42 -175.6(5) . . . . ?
N7 C41 C42 C43 1.5(7) . . . . ?
C40 C41 C42 C43 -179.5(5) . . . . ?
C41 C42 C43 C44 -0.1(8) . . . . ?
C42 C43 C44 C45 -0.7(8) . . . . ?
C41 N7 C45 C44 1.1(7) . . . . ?
Ir2 N7 C45 C44 -173.5(4) . . . . ?
C43 C44 C45 N7 0.2(8) . . . . ?
C51 C46 C47 C48 2.3(8) . . . . ?
Ir2 C46 C47 C48 -174.6(5) . . . . ?
C46 C47 C48 F7 -179.3(6) . . . . ?
C46 C47 C48 C49 -1.6(11) . . . . ?
F7 C48 C49 C50 178.1(7) . . . . ?
C47 C48 C49 C50 0.4(12) . . . . ?
C48 C49 C50 F8 179.2(6) . . . . ?
C48 C49 C50 C51 0.0(11) . . . . ?
F8 C50 C51 C46 -178.4(5) . . . . ?
C49 C50 C51 C46 0.8(10) . . . . ?
F8 C50 C51 C52 -0.5(9) . . . . ?
C49 C50 C51 C52 178.7(6) . . . . ?
C47 C46 C51 C50 -2.0(8) . . . . ?
Ir2 C46 C51 C50 175.3(4) . . . . ?
C47 C46 C51 C52 179.9(5) . . . . ?
Ir2 C46 C51 C52 -2.8(6) . . . . ?
C56 N8 C52 C53 -1.0(7) . . . . ?
Ir2 N8 C52 C53 175.9(4) . . . . ?
C56 N8 C52 C51 179.8(4) . . . . ?
Ir2 N8 C52 C51 -3.3(5) . . . . ?
C50 C51 C52 N8 -174.0(5) . . . . ?
C46 C51 C52 N8 4.0(6) . . . . ?
C50 C51 C52 C53 6.9(9) . . . . ?
C46 C51 C52 C53 -175.1(5) . . . . ?
N8 C52 C53 C54 0.8(8) . . . . ?
C51 C52 C53 C54 179.9(5) . . . . ?
C52 C53 C54 C55 -0.2(8) . . . . ?
C53 C54 C55 C56 -0.2(8) . . . . ?
C52 N8 C56 C55 0.6(7) . . . . ?
Ir2 N8 C56 C55 -176.0(4) . . . . ?
C54 C55 C56 N8 0.0(8) . . . . ?
C60 O7 C57 C58 -2.2(12) . . . . ?
O7 C57 C58 C59 -19.0(13) . . . . ?
C57 C58 C59 C60 31.8(12) . . . . ?
C57 O7 C60 C59 23.9(10) . . . . ?
C58 C59 C60 O7 -36.2(11) . . . . ?
C64 C63 C62 C61 -3.2(16) . . . . ?
C63 C62 C61 O8 -11.4(15) . . . . ?
C62 C61 O8 C64 22.2(14) . . . . ?
C61 O8 C64 C63 -26.8(16) . . . . ?
C62 C63 C64 O8 18.6(16) . . . . ?
C68 O9 C65 C66 -32.3(12) . . . . ?
O9 C65 C66 C67 12.2(10) . . . . ?
O9 C65 C66 C68 22.9(9) . . . . ?
C65 C66 C67 C68 14.0(9) . . . . ?
C65 O9 C68 C67 50.8(17) . . . . ?
C65 O9 C68 C66 22.5(9) . . . . ?
C66 C67 C68 O9 -40.4(15) . . . . ?
C72 O10 C69 C70 -36(2) . . . . ?
O10 C69 C70 C71 22(3) . . . . ?
C69 C70 C71 C72 2(3) . . . . ?
C69 O10 C72 C71 38(3) . . . . ?
C70 C71 C72 O10 -27(3) . . . . ?
 
_refine_diff_density_max    2.623
_refine_diff_density_min   -1.480
_refine_diff_density_rms    0.177

_shelx_res_file
;
TITL d8-5400_a.res in P-1
    d8-5400_a.res
    created by SHELXL-2016/6 at 09:04:46 on 12-Aug-2021
REM Old TITL d8-5400 in P-1
REM SHELXT solution in P-1
REM R1 0.108,  Rweak 0.004,  Alpha 0.044,  Orientation as input
REM Formula found by SHELXT:  C59 F5 Ir2 N14 O14
CELL  0.71073  12.0056  13.9227  21.5251   84.548   81.768   87.722
ZERR    4.000   0.0009   0.0010   0.0015    0.003    0.003    0.003
LATT  1
SFAC C H F IR N O
UNIT 132 108 16 4 16 17
TEMP -173.150
SIZE 0.123 0.167 0.257
L.S. 10
BOND $H
LIST 4
ACTA
FMAP 2
sadi 0.02 c61 c62 c62 c63 c63 c64 c64 o8 o8 c61
simu 0.005 c61 c62 c63 c64 o8
sadi 0.02 c57 c58 c58 c59 c59 c60 c60 o7 o7 c57
simu 0.01 c57 c58 c59 c60 o7
simu 0.005 n5 c30 c31 n6 c32 c33 o6 c34
sadi 0.02 c65 c66 c66 c67 c67 c68 c68 o9 o9 c65
simu 0.005 c65 c66 c67 c68 o9
dfix 1.55 c65 c66 c66 c67 c67 c68 c68 o9 o9 c65
dang 2.20 c65 c68 c68 c66 c65 c67
flat 0.05 c65 c66 c67 c68 o9
simu 0.01 o10 c69 c70 c71 c72
sadi 0.02 o10 c69 c69 c70 c70 c71 c71 c72 c72 o10
PLAN 40
conf
htab
OMIT 1 0 2
OMIT -1 0 1
OMIT 0 1 2
OMIT 0 1 4
OMIT 2 2 3
OMIT -1 -1 2
WGHT    0.057400   17.270100
EXTI    0.001086
FVAR       0.29703
IR1   4    0.815996    0.794110    0.425942    11.00000    0.01329    0.01787 =
         0.02425   -0.00323   -0.00283   -0.00123
IR2   4    0.727244    0.391259    0.864046    11.00000    0.02081    0.02988 =
         0.02297   -0.00445    0.00079   -0.00238
F1    3    0.808421    1.013294    0.204885    11.00000    0.08380    0.04909 =
         0.02729    0.00306   -0.01591   -0.00067
F2    3    0.868824    1.168591    0.379666    11.00000    0.07944    0.02192 =
         0.04224    0.00073   -0.01241   -0.01386
F3    3    0.391450    0.889559    0.525160    11.00000    0.01898    0.07561 =
         0.07456   -0.03850    0.00028    0.00748
F4    3    0.437270    0.689011    0.360207    11.00000    0.02246    0.04473 =
         0.05724   -0.01424   -0.01412   -0.00841
F5    3    1.082915    0.404338    0.989834    11.00000    0.05429    0.13617 =
         0.13360   -0.10588   -0.05625    0.03893
F6    3    1.115756    0.202164    0.827550    11.00000    0.04069    0.06661 =
         0.05900   -0.03522   -0.01353    0.02242
F7    3    0.613056    0.029826    0.957738    11.00000    0.11162    0.05017 =
         0.07315    0.01977   -0.01468   -0.03142
F8    3    0.533668    0.275579    1.092289    11.00000    0.07450    0.10143 =
         0.03150    0.00825    0.01557   -0.00921

O1    6    0.996670    0.779208    0.413630    11.00000    0.01642    0.02468 =
         0.02777   -0.00338   -0.00271   -0.00277
O2    6    1.140281    0.712758    0.460802    11.00000    0.01645    0.03094 =
         0.04083   -0.00861   -0.00714    0.00056
O3    6    0.947352    0.469137    0.620258    11.00000    0.05062    0.03022 =
         0.04150    0.00716   -0.01528    0.00028
O4    6    0.566852    0.423699    0.831795    11.00000    0.02842    0.05325 =
         0.02988   -0.00834   -0.00355    0.00455
O5    6    0.470331    0.531019    0.775732    11.00000    0.07447    0.07268 =
         0.06997   -0.01263   -0.04212    0.02376
O6    6    0.777417    0.740838    0.665463    11.00000    0.22741    0.07306 =
         0.05457    0.02489   -0.02081   -0.05155
O7    6    0.353531    0.208755    0.909951    11.00000    0.06448    0.07339 =
         0.10593   -0.00414   -0.02300    0.00273
N1    5    0.845527    0.673829    0.491745    11.00000    0.01809    0.01953 =
         0.02938   -0.00365   -0.00275   -0.00116
N2    5    0.914788    0.532824    0.579103    11.00000    0.03732    0.02141 =
         0.02984   -0.00111   -0.00716   -0.00101
N3    5    0.833155    0.894667    0.486904    11.00000    0.01420    0.02008 =
         0.02533   -0.00452   -0.00305   -0.00263
N4    5    0.791062    0.702864    0.360821    11.00000    0.01780    0.02131 =
         0.02796   -0.00655   -0.00446   -0.00072
N5    5    0.759833    0.511665    0.796209    11.00000    0.06081    0.03125 =
         0.02589   -0.00759    0.00797   -0.00715
N6    5    0.772570    0.667953    0.706616    11.00000    0.14147    0.05110 =
         0.03983    0.00064   -0.00412   -0.03040
N7    5    0.783763    0.298862    0.797652    11.00000    0.02670    0.02969 =
         0.02412   -0.00359   -0.00054   -0.00578
N8    5    0.678119    0.470123    0.939181    11.00000    0.02083    0.04133 =
         0.02791   -0.00906   -0.00068    0.00150
C1    1    1.039958    0.721532    0.454320    11.00000    0.01662    0.01940 =
         0.03197   -0.00826   -0.00516   -0.00037
C2    1    0.955586    0.658835    0.498244    11.00000    0.01890    0.01992 =
         0.02698   -0.00502   -0.00419    0.00017
C3    1    0.990656    0.589806    0.540909    11.00000    0.02787    0.02678 =
         0.03467   -0.00915   -0.01032    0.00225
AFIX  43
H3    2    1.068629    0.581353    0.544042    11.00000   -1.20000
AFIX   0
C4    1    0.802405    0.543550    0.571825    11.00000    0.03129    0.02335 =
         0.03295   -0.00112    0.00037   -0.00284
C5    1    0.771550    0.615741    0.528593    11.00000    0.01969    0.02299 =
         0.03600   -0.00132    0.00069   -0.00096
AFIX  43
H5    2    0.693934    0.624841    0.524682    11.00000   -1.20000
AFIX   0
C6    1    0.725581    0.473114    0.610699    11.00000    0.03722    0.02799 =
         0.04323    0.00342    0.01026   -0.00247
AFIX 137
H6A   2    0.743121    0.408467    0.596908    11.00000   -1.50000
H6B   2    0.647459    0.491369    0.605721    11.00000   -1.50000
H6C   2    0.735490    0.473049    0.655111    11.00000   -1.50000
AFIX   0
C7    1    0.816446    0.913759    0.366555    11.00000    0.01767    0.02206 =
         0.02560   -0.00211   -0.00356    0.00114
C8    1    0.805248    0.920298    0.302496    11.00000    0.02876    0.03082 =
         0.02739   -0.00568   -0.00673    0.00373
AFIX  43
H8    2    0.789515    0.864585    0.283322    11.00000   -1.20000
AFIX   0
C9    1    0.817261    1.008370    0.267436    11.00000    0.04822    0.03853 =
         0.02497    0.00145   -0.00843    0.00117
C10   1    0.839221    1.092706    0.291991    11.00000    0.05397    0.03047 =
         0.03463    0.00464   -0.00837   -0.00352
AFIX  43
H10   2    0.847552    1.152326    0.266598    11.00000   -1.20000
AFIX   0
C11   1    0.848380    1.085470    0.355501    11.00000    0.03959    0.02289 =
         0.03335   -0.00108   -0.00425   -0.00411
C12   1    0.837435    0.999172    0.393943    11.00000    0.01976    0.02183 =
         0.02710   -0.00214   -0.00309   -0.00105
C13   1    0.844607    0.987820    0.461351    11.00000    0.01356    0.02089 =
         0.02826   -0.00335   -0.00134   -0.00133
C14   1    0.859076    1.061036    0.499582    11.00000    0.02196    0.02295 =
         0.03226   -0.00681   -0.00385   -0.00189
AFIX  43
H14   2    0.868250    1.125752    0.481657    11.00000   -1.20000
AFIX   0
C15   1    0.859970    1.038808    0.563609    11.00000    0.02966    0.02972 =
         0.03227   -0.01073   -0.00458   -0.00378
AFIX  43
H15   2    0.869762    1.088021    0.589893    11.00000   -1.20000
AFIX   0
C16   1    0.846341    0.943407    0.589079    11.00000    0.03601    0.03430 =
         0.02656   -0.00717   -0.00654   -0.00380
AFIX  43
H16   2    0.846204    0.926660    0.632915    11.00000   -1.20000
AFIX   0
C17   1    0.833091    0.873990    0.549456    11.00000    0.02898    0.02532 =
         0.02648   -0.00221   -0.00348   -0.00361
AFIX  43
H17   2    0.823533    0.809024    0.566802    11.00000   -1.20000
AFIX   0
C18   1    0.648201    0.797511    0.437361    11.00000    0.01304    0.02071 =
         0.03192   -0.00291   -0.00478   -0.00140
C19   1    0.576009    0.847843    0.480472    11.00000    0.01865    0.03263 =
         0.04147   -0.01101   -0.00459    0.00081
AFIX  43
H19   2    0.605435    0.886136    0.508247    11.00000   -1.20000
AFIX   0
C20   1    0.460880    0.841099    0.482130    11.00000    0.01826    0.03893 =
         0.04792   -0.01013   -0.00075    0.00350
C21   1    0.410687    0.787187    0.442740    11.00000    0.01561    0.03524 =
         0.04794   -0.00169   -0.00499   -0.00128
AFIX  43
H21   2    0.331313    0.783582    0.445133    11.00000   -1.20000
AFIX   0
C22   1    0.483894    0.739844    0.400394    11.00000    0.01818    0.02731 =
         0.04030   -0.00250   -0.00996   -0.00416
C23   1    0.600883    0.741259    0.396250    11.00000    0.01653    0.02332 =
         0.03324   -0.00251   -0.00646   -0.00243
C24   1    0.681176    0.688842    0.353403    11.00000    0.02036    0.02274 =
         0.03061   -0.00524   -0.00781   -0.00207
C25   1    0.658368    0.628293    0.308976    11.00000    0.03106    0.03145 =
         0.03651   -0.01017   -0.01322   -0.00407
AFIX  43
H25   2    0.582620    0.618008    0.303784    11.00000   -1.20000
AFIX   0
C26   1    0.745099    0.583380    0.272625    11.00000    0.04036    0.03676 =
         0.03742   -0.01612   -0.01153   -0.00057
AFIX  43
H26   2    0.729519    0.542490    0.242196    11.00000   -1.20000
AFIX   0
C27   1    0.855635    0.598356    0.280813    11.00000    0.03297    0.03765 =
         0.03905   -0.01675   -0.00434    0.00293
AFIX  43
H27   2    0.916511    0.567801    0.256227    11.00000   -1.20000
AFIX   0
C28   1    0.875385    0.658346    0.325252    11.00000    0.02290    0.02978 =
         0.03264   -0.00977   -0.00318    0.00309
AFIX  43
H28   2    0.950882    0.668598    0.330960    11.00000   -1.20000
AFIX   0
C29   1    0.556869    0.498105    0.794776    11.00000    0.05333    0.04856 =
         0.03271   -0.01388   -0.01490    0.01176
C30   1    0.666785    0.549712    0.772518    11.00000    0.07936    0.03576 =
         0.02675   -0.00456   -0.00773   -0.00215
C31   1    0.670658    0.627668    0.729213    11.00000    0.11548    0.04723 =
         0.03787    0.00081   -0.01491   -0.00989
AFIX  43
H31   2    0.603679    0.653873    0.714805    11.00000   -1.20000
AFIX   0
C32   1    0.869874    0.630150    0.728025    11.00000    0.11793    0.04978 =
         0.03910   -0.01374    0.01991   -0.04106
C33   1    0.859898    0.552001    0.774440    11.00000    0.08220    0.04005 =
         0.03606   -0.01382    0.02183   -0.02435
AFIX  43
H33   2    0.925350    0.526772    0.791006    11.00000   -1.20000
AFIX   0
C34   1    0.979157    0.675471    0.703640    11.00000    0.14889    0.07943 =
         0.05711   -0.02155    0.03999   -0.07483
AFIX 137
H34A  2    0.978210    0.702532    0.659988    11.00000   -1.50000
H34B  2    1.040110    0.626720    0.705153    11.00000   -1.50000
H34C  2    0.991344    0.727101    0.729669    11.00000   -1.50000
AFIX   0
C35   1    0.880722    0.361506    0.886188    11.00000    0.02473    0.03847 =
         0.03618   -0.01583   -0.00308    0.00075
C36   1    0.929384    0.399152    0.933565    11.00000    0.02989    0.06276 =
         0.06583   -0.04135   -0.01557    0.01118
AFIX  43
H36   2    0.889296    0.445047    0.958839    11.00000   -1.20000
AFIX   0
C37   1    1.036838    0.368288    0.942872    11.00000    0.03747    0.08127 =
         0.07763   -0.05322   -0.02458    0.01219
C38   1    1.101941    0.303450    0.908183    11.00000    0.03535    0.07536 =
         0.07340   -0.04418   -0.02228    0.01536
AFIX  43
H38   2    1.176277    0.284951    0.915557    11.00000   -1.20000
AFIX   0
C39   1    1.051916    0.267202    0.862023    11.00000    0.03120    0.05431 =
         0.04904   -0.02730   -0.00867    0.01160
C40   1    0.943686    0.293040    0.849847    11.00000    0.02730    0.03695 =
         0.03473   -0.01345   -0.00311    0.00026
C41   1    0.886554    0.255997    0.801440    11.00000    0.02853    0.03045 =
         0.02581   -0.00530    0.00037   -0.00266
C42   1    0.927052    0.184178    0.762596    11.00000    0.03576    0.03453 =
         0.03287   -0.00974    0.00063    0.00127
AFIX  43
H42   2    0.998182    0.153335    0.766102    11.00000   -1.20000
AFIX   0
C43   1    0.862560    0.158301    0.718892    11.00000    0.05045    0.03624 =
         0.02743   -0.00906   -0.00213   -0.00125
AFIX  43
H43   2    0.889429    0.109501    0.692081    11.00000   -1.20000
AFIX   0
C44   1    0.759064    0.203278    0.714117    11.00000    0.04996    0.04059 =
         0.02753   -0.00761   -0.01001   -0.00245
AFIX  43
H44   2    0.714422    0.186535    0.683922    11.00000   -1.20000
AFIX   0
C45   1    0.722182    0.272952    0.754176    11.00000    0.03308    0.03904 =
         0.02599   -0.00367   -0.00519   -0.00327
AFIX  43
H45   2    0.650975    0.303984    0.751225    11.00000   -1.20000
AFIX   0
C46   1    0.670648    0.284763    0.928683    11.00000    0.02826    0.04237 =
         0.02773    0.00172   -0.00587   -0.00495
C47   1    0.665823    0.187852    0.919532    11.00000    0.04676    0.04067 =
         0.03900    0.00527   -0.00680   -0.01033
AFIX  43
H47   2    0.696778    0.164859    0.880392    11.00000   -1.20000
AFIX   0
C48   1    0.615254    0.125032    0.968236    11.00000    0.06435    0.04794 =
         0.05447    0.01521   -0.01299   -0.02106
C49   1    0.571254    0.152657    1.026324    11.00000    0.06943    0.07155 =
         0.04326    0.02232   -0.00332   -0.02319
AFIX  43
H49   2    0.537424    0.107829    1.058935    11.00000   -1.20000
AFIX   0
C50   1    0.578573    0.248058    1.034898    11.00000    0.04986    0.07627 =
         0.02991    0.01006   -0.00016   -0.01032
C51   1    0.627540    0.316084    0.988288    11.00000    0.03041    0.05444 =
         0.02521    0.00311   -0.00161   -0.00355
C52   1    0.635976    0.419704    0.994163    11.00000    0.02084    0.05858 =
         0.02723   -0.00719   -0.00003    0.00307
C53   1    0.607306    0.467721    1.048721    11.00000    0.02844    0.08388 =
         0.02693   -0.01498   -0.00077    0.00417
AFIX  43
H53   2    0.578753    0.432443    1.087294    11.00000   -1.20000
AFIX   0
C54   1    0.620192    0.565127    1.046767    11.00000    0.02913    0.08569 =
         0.03944   -0.03206   -0.00201    0.00685
AFIX  43
H54   2    0.600384    0.597444    1.083878    11.00000   -1.20000
AFIX   0
C55   1    0.662300    0.616824    0.990437    11.00000    0.02700    0.06111 =
         0.04912   -0.02817   -0.00252    0.00379
AFIX  43
H55   2    0.671670    0.684563    0.988123    11.00000   -1.20000
AFIX   0
C56   1    0.690101    0.566204    0.937843    11.00000    0.02766    0.04185 =
         0.03726   -0.01436    0.00066    0.00095
AFIX  43
H56   2    0.718934    0.600707    0.899037    11.00000   -1.20000
AFIX   0
C57   1    0.401513    0.236238    0.842878    11.00000    0.08038    0.09059 =
         0.11522    0.00596   -0.01571   -0.00921
AFIX  23
H57A  2    0.350587    0.285096    0.824388    11.00000   -1.20000
H57B  2    0.474926    0.266624    0.842096    11.00000   -1.20000
AFIX   0
C58   1    0.417381    0.157920    0.804678    11.00000    0.09184    0.10750 =
         0.10249   -0.01367   -0.02492    0.00448
AFIX  23
H58A  2    0.490138    0.161586    0.776468    11.00000   -1.20000
H58B  2    0.355512    0.155566    0.779039    11.00000   -1.20000
AFIX   0
C59   1    0.416199    0.072365    0.853394    11.00000    0.09612    0.09249 =
         0.10943   -0.02713   -0.03989    0.01681
AFIX  23
H59A  2    0.387619    0.014464    0.838133    11.00000   -1.20000
H59B  2    0.492200    0.057410    0.865096    11.00000   -1.20000
AFIX   0
C60   1    0.338420    0.106426    0.906781    11.00000    0.09220    0.10018 =
         0.10662   -0.00403   -0.03121    0.01762
AFIX  23
H60A  2    0.259726    0.095214    0.901122    11.00000   -1.20000
H60B  2    0.353700    0.070032    0.946599    11.00000   -1.20000
AFIX   0
PART 1
C63   1    0.329501    0.649554    0.621776    10.50000    0.04803    0.06467 =
         0.12095    0.03616    0.00429   -0.00307
AFIX  23
H63A  2    0.306885    0.717482    0.610721    10.50000   -1.20000
H63B  2    0.290053    0.627277    0.663962    10.50000   -1.20000
AFIX   0
C62   1    0.308040    0.585431    0.572707    10.50000    0.03618    0.06246 =
         0.10947    0.04450   -0.01719   -0.01265
AFIX  23
H62A  2    0.259298    0.532067    0.592597    10.50000   -1.20000
H62B  2    0.268609    0.622916    0.540584    10.50000   -1.20000
AFIX   0
C61   1    0.412916    0.546682    0.543173    10.50000    0.04405    0.06155 =
         0.11339    0.03489   -0.00827   -0.00769
AFIX  23
H61A  2    0.417763    0.555220    0.496685    10.50000   -1.20000
H61B  2    0.421859    0.477152    0.556650    10.50000   -1.20000
AFIX   0
O8    6    0.497724    0.602411    0.564658    10.50000    0.02351    0.04749 =
         0.11820    0.03028    0.00378   -0.00073

C64   1    0.446634    0.638024    0.618897    10.50000    0.05058    0.06065 =
         0.11952    0.03334    0.00251   -0.00145
AFIX  23
H64A  2    0.478767    0.701299    0.622564    10.50000   -1.20000
H64B  2    0.463615    0.593749    0.655319    10.50000   -1.20000
AFIX   0

PART 2
O9    6    0.778709    0.757326    0.833818    10.50000    0.12371    0.04343 =
         0.06287   -0.01187    0.00537   -0.00846
C65   1    0.692399    0.831408    0.829828    10.50000    0.13932    0.06762 =
         0.07994   -0.00950    0.00671   -0.00792
AFIX  23
H65A  2    0.706786    0.874159    0.790233    10.50000   -1.20000
H65B  2    0.616783    0.803793    0.833371    10.50000   -1.20000
AFIX   0
C66   1    0.704466    0.879812    0.882556    10.50000    0.14337    0.07706 =
         0.08618   -0.01069    0.00620   -0.00970
AFIX  23
H66A  2    0.636826    0.866688    0.913926    10.50000   -1.20000
H66B  2    0.702248    0.949818    0.869214    10.50000   -1.20000
AFIX   0
C67   1    0.799157    0.861399    0.914402    10.50000    0.14503    0.08100 =
         0.08874   -0.01320    0.00632   -0.01244
AFIX  23
H67A  2    0.784790    0.818067    0.953741    10.50000   -1.20000
H67B  2    0.838278    0.920043    0.921086    10.50000   -1.20000
AFIX   0
C68   1    0.849693    0.813229    0.859587    10.50000    0.14164    0.07033 =
         0.08225   -0.01306    0.00807   -0.01121
AFIX  23
H68A  2    0.881192    0.863023    0.826526    10.50000   -1.20000
H68B  2    0.913322    0.771608    0.871674    10.50000   -1.20000
AFIX   0
PART 3
O10   6    1.133459    0.602747    0.816703    10.50000    0.11045    0.09804 =
         0.12516   -0.02931    0.00618    0.01634
C69   1    1.228113    0.667956    0.811366    10.50000    0.10974    0.07809 =
         0.11418   -0.01464   -0.02036    0.02089
AFIX  23
H69A  2    1.296975    0.630364    0.819726    10.50000   -1.20000
H69B  2    1.241961    0.699954    0.767994    10.50000   -1.20000
AFIX   0
C70   1    1.203742    0.740650    0.856138    10.50000    0.11542    0.08796 =
         0.12167   -0.00152   -0.02639    0.00334
AFIX  23
H70A  2    1.272063    0.754338    0.874289    10.50000   -1.20000
H70B  2    1.175094    0.801426    0.835541    10.50000   -1.20000
AFIX   0
C71   1    1.119058    0.698812    0.904145    10.50000    0.12482    0.10227 =
         0.13164   -0.01449   -0.01062    0.00477
AFIX  23
H71A  2    1.047652    0.737185    0.905772    10.50000   -1.20000
H71B  2    1.144525    0.694141    0.946112    10.50000   -1.20000
AFIX   0
C72   1    1.105668    0.603186    0.884031    10.50000    0.12190    0.10001 =
         0.12812   -0.01564   -0.01186    0.00109
AFIX  23
H72A  2    1.155169    0.555925    0.905046    10.50000   -1.20000
H72B  2    1.026853    0.583320    0.896969    10.50000   -1.20000
PART 0
AFIX   0
HKLF 4


REM  d8-5400_a.res in P-1
REM R1 =  0.0362 for   18913 Fo > 4sig(Fo)  and  0.0409 for all   20781 data
REM    904 parameters refined using    224 restraints

END

WGHT      0.0575     17.2739

REM Instructions for potential hydrogen bonds
HTAB C5 O8
EQIV $1 -x+2, -y+1, -z+1
HTAB C6 O2_$1
HTAB C6 O8
HTAB C8 N4
HTAB C14 F2
EQIV $2 -x+2, -y+2, -z+1
HTAB C14 O2_$2
HTAB C17 O6
HTAB C17 N1
EQIV $3 x-1, y, z
HTAB C21 O2_$3
HTAB C25 F4
HTAB C28 O1
HTAB C28 O3_$1
HTAB C34 F2_$2
EQIV $4 -x+2, -y+1, -z+2
HTAB C36 F5_$4
HTAB C36 N8
EQIV $5 x+1, y, z
HTAB C38 O7_$5
HTAB C42 F6
HTAB C45 O4
HTAB C47 N7
HTAB C53 F8
HTAB C56 N5
HTAB C56 O9
HTAB C57 O4
HTAB C59 F7
EQIV $6 -x+1, -y, -z+2
HTAB C60 F7_$6
EQIV $7 -x+1, -y+2, -z+1
HTAB C63 F2_$7
EQIV $8 -x+1, -y+1, -z+2
HTAB C65 F8_$8
HTAB C69 O5_$5
HTAB C70 F8_$4
HTAB C72 F5_$4

REM Highest difference peak  2.623,  deepest hole -1.480,  1-sigma level  0.177
Q1    1   0.8649  0.9081  0.8007  11.00000  0.05    2.62
Q2    1   0.5149  0.9718  0.6540  11.00000  0.05    2.60
Q3    1   0.4011  0.6138  0.5918  11.00000  0.05    2.56
Q4    1   0.6121  0.9740  0.7272  11.00000  0.05    2.45
Q5    1   0.4943  0.8937  0.6638  11.00000  0.05    2.20
Q6    1   0.4872  0.8587  0.7479  11.00000  0.05    2.16
Q7    1   0.3200  0.5601  0.5563  11.00000  0.05    2.08
Q8    1   0.7941  0.8317  0.8420  11.00000  0.05    2.06
Q9    1   0.4983  0.6089  0.5966  11.00000  0.05    1.90
Q10   1   0.7613  0.4177  0.8807  11.00000  0.05    1.81
Q11   1   0.3447  0.6618  0.6530  11.00000  0.05    1.62
Q12   1   0.5555  0.9483  0.7112  11.00000  0.05    1.42
Q13   1   0.3823  0.1631  0.8808  11.00000  0.05    1.40
Q14   1   1.1005  0.8015  1.0101  11.00000  0.05    1.34
Q15   1   0.4913  0.6119  0.5510  11.00000  0.05    1.33
Q16   1   0.6419  1.0226  0.2846  11.00000  0.05    1.31
Q17   1   0.9268  1.0731  0.9914  11.00000  0.05    1.30
Q18   1   0.2754  0.6166  0.5863  11.00000  0.05    1.15
Q19   1   1.0382  0.9579  0.9529  11.00000  0.05    1.13
Q20   1   0.9770  1.0374  0.9399  11.00000  0.05    1.03
Q21   1   1.0992  0.8777  0.9977  11.00000  0.05    1.03
Q22   1   0.8464  0.7204  0.6546  11.00000  0.05    1.02
Q23   1   0.8322  0.6569  0.7055  11.00000  0.05    0.95
Q24   1   1.0864  0.7348  0.8814  11.00000  0.05    0.95
Q25   1   1.1471  0.5784  0.8302  11.00000  0.05    0.92
Q26   1   0.8117  0.7828  0.4610  11.00000  0.05    0.92
Q27   1   0.7229  0.6356  0.7183  11.00000  0.05    0.92
Q28   1   0.5566  0.6489  0.7030  11.00000  0.05    0.90
Q29   1   0.5756  0.8896  0.7545  11.00000  0.05    0.90
Q30   1   1.1766  0.6549  0.8301  11.00000  0.05    0.84
Q31   1   0.8200  0.8125  0.3921  11.00000  0.05    0.82
Q32   1   1.1459  0.6520  0.8395  11.00000  0.05    0.82
Q33   1   1.1631  0.5783  0.8633  11.00000  0.05    0.79
Q34   1   0.4257  0.2104  0.8103  11.00000  0.05    0.78
Q35   1   0.5985  0.8201  0.6537  11.00000  0.05    0.78
Q36   1   0.1648  0.6165  0.5970  11.00000  0.05    0.75
Q37   1   1.1205  0.5596  0.5434  11.00000  0.05    0.75
Q38   1   0.7373  0.3408  0.8789  11.00000  0.05    0.74
Q39   1   1.1280  0.6561  0.7921  11.00000  0.05    0.71
Q40   1   1.1081  0.4734  0.9515  11.00000  0.05    0.66
;
_shelx_res_checksum   24098

_shelx_hkl_file
;
  -3   0   0 3377.96  122.89
  -3   0   0 3361.06  121.79
  -3   0   0 3250.27  120.49
  -3   0   0 3266.67  121.19
  -3   0   0 3283.27  121.09
  -3   0   0 3504.95  121.49
  -3   0   0 3170.88  122.79
   3   0   0 3407.96  120.49
   3   0   0 3049.09  121.49
   3   0   0 3537.35  121.89
   3   0   0 3435.76  120.99
   3   0   0 3441.46  121.29
   3   0   0 3327.77  122.69
   3   0   0 3467.45  122.89
   3   0   0 3263.87  121.19
  -4   0   0  308.07   13.70
  -4   0   0  314.97   13.70
  -4   0   0  284.27   15.40
  -4   0   0  293.27   14.30
  -4   0   0  363.46   13.30
  -4   0   0  305.17   15.50
   4   0   0  347.57   13.10
   4   0   0  310.77   14.40
   4   0   0  314.37   13.80
   4   0   0  313.77   13.50
   4   0   0  328.67   13.90
   4   0   0  287.37   15.20
   4   0   0  307.37   15.40
  -5   0   0  364.66   16.30
  -5   0   0  386.26   16.90
  -5   0   0  378.66   18.70
  -5   0   0  351.86   18.60
  -5   0   0  395.16   17.50
  -5   0   0  353.06   16.30
  -5   0   0  350.26   16.30
   5   0   0  406.16   19.00
   5   0   0  361.86   16.00
   5   0   0  378.56   16.40
   5   0   0  395.56   17.40
   5   0   0  359.36   16.40
   5   0   0  368.76   15.40
   5   0   0  351.46   18.30
  -6   0   0  268.07   15.80
  -6   0   0  232.58   15.50
  -6   0   0  275.97   13.40
  -6   0   0  264.17   14.30
  -6   0   0  279.17   14.70
  -6   0   0  274.47   13.40
  -6   0   0  284.07   14.00
   6   0   0  276.47   16.00
   6   0   0  251.17   15.40
   6   0   0  266.97   12.00
   6   0   0  271.37   13.50
   6   0   0  263.57   12.10
   6   0   0  288.67   13.50
   6   0   0  263.17   14.10
  -7   0   0  597.94   25.90
  -7   0   0  596.84   25.80
  -7   0   0  606.64   26.50
  -7   0   0  634.94   29.40
  -7   0   0  540.95   29.00
  -7   0   0  605.34   27.30
  -7   0   0  625.74   26.00
  -7   0   0  589.44   27.20
   7   0   0  619.34   27.10
   7   0   0  606.54   25.40
   7   0   0  570.54   25.70
   7   0   0  616.64   26.10
   7   0   0  604.84   24.30
   7   0   0  575.44   24.10
   7   0   0  565.14   28.60
  -8   0   0  291.37   16.00
  -8   0   0  303.17   16.90
  -8   0   0  298.37   15.40
  -8   0   0  268.77   16.50
  -8   0   0  246.48   18.10
  -8   0   0  309.97   15.80
  -8   0   0  289.97   15.40
  -8   0   0  278.17   18.50
   8   0   0  288.37   14.80
   8   0   0  294.57   13.70
   8   0   0  281.57   16.30
   8   0   0  296.07   16.50
   8   0   0  282.77   15.20
   8   0   0  233.58   17.00
   8   0   0  320.07   18.90
   8   0   0  309.57   13.60
   8   0   0  284.77   15.10
  -9   0   0 1393.36   55.69
  -9   0   0 1355.86   55.69
  -9   0   0 1259.67   60.19
  -9   0   0 1450.55   60.59
  -9   0   0 1411.66   55.69
  -9   0   0 1392.06   57.49
  -9   0   0 1424.56   56.69
  -9   0   0 1371.56   61.29
   9   0   0 1334.17   56.89
   9   0   0 1333.47   55.49
   9   0   0 1375.96   55.29
   9   0   0 1469.15   60.29
   9   0   0 1382.66   60.09
   9   0   0 1468.45   55.09
   9   0   0 1353.66   52.89
   9   0   0 1436.06   53.59
 -10   0   0   16.10    4.80
 -10   0   0   15.00    3.90
 -10   0   0   22.10    5.00
 -10   0   0    7.80    4.20
 -10   0   0   26.50    7.40
 -10   0   0    6.30    4.40
 -10   0   0   12.30    5.50
 -10   0   0   10.20    3.70
  10   0   0   15.20    5.10
  10   0   0   13.90    2.70
  10   0   0   12.80    4.30
  10   0   0   15.80    4.90
  10   0   0   15.30    3.20
  10   0   0   16.70    4.60
  10   0   0   21.80    7.00
  10   0   0   13.30    4.40
  10   0   0   13.30    4.10
 -11   0   0  999.20   54.29
 -11   0   0 1146.29   49.40
 -11   0   0 1155.28   49.70
 -11   0   0 1150.18   54.69
 -11   0   0 1230.18   52.79
 -11   0   0 1205.08   51.89
 -11   0   0 1173.68   51.09
  11   0   0 1314.17   52.99
  11   0   0 1172.28   51.39
  11   0   0 1195.88   46.80
  11   0   0 1184.68   46.00
  11   0   0 1185.48   48.90
  11   0   0 1216.78   54.99
  11   0   0 1186.28   54.99
  11   0   0 1169.68   51.19
 -12   0   0   19.70    6.90
 -12   0   0   24.70    8.00
 -12   0   0   22.00    6.70
 -12   0   0   15.40    5.80
 -12   0   0   20.30    5.20
 -12   0   0   22.40    7.10
 -12   0   0   21.70    6.70
  12   0   0   21.50    4.60
  12   0   0   26.00    6.10
  12   0   0   31.40    8.80
  12   0   0   31.00    6.40
  12   0   0   21.20    4.20
  12   0   0   23.70    6.60
  12   0   0   21.80    7.20
 -13   0   0  805.42   40.70
 -13   0   0  869.81   44.70
 -13   0   0  855.21   38.40
 -13   0   0  797.62   39.40
 -13   0   0  786.32   38.00
 -13   0   0  839.92   40.70
 -13   0   0  765.52   37.40
  13   0   0  766.52   33.70
  13   0   0  732.93   39.50
  13   0   0  823.22   39.80
  13   0   0  767.12   32.30
  13   0   0  835.82   37.10
 -14   0   0   58.89   14.60
 -14   0   0   48.10    9.10
 -14   0   0   70.49   11.60
 -14   0   0   56.89   12.00
 -14   0   0   43.20    9.80
 -14   0   0   49.40    9.20
 -14   0   0   48.40    9.70
  14   0   0   57.99   11.90
  14   0   0   71.19   12.90
  14   0   0   50.59    7.00
  14   0   0   59.49    9.80
  14   0   0   73.59   15.70
  14   0   0   52.39    5.60
 -15   0   0  193.38   20.70
 -15   0   0  158.88   15.90
 -15   0   0  149.09   16.70
 -15   0   0  167.08   18.10
 -15   0   0  160.18   15.70
 -15   0   0  163.88   16.00
  15   0   0  156.18    9.60
  15   0   0  194.18   16.00
  15   0   0  193.28   17.90
  15   0   0  177.78   11.90
  15   0   0  258.07   23.00
 -16   0   0   32.80    9.80
 -16   0   0   34.80   10.30
 -16   0   0   14.80    5.90
 -16   0   0   42.40    9.80
 -16   0   0   20.50    6.80
  16   0   0   12.10    8.30
  16   0   0   19.10    7.40
  16  -1   0   10.10    6.80
  16  -1   0   11.60    8.70
  16  -1   0    9.00    7.70
 -16   1   0    7.90    8.40
 -16   1   0    5.20    7.10
 -16   1   0   11.80    6.30
 -16   1   0   11.40    6.70
 -16   1   0   13.80    5.30
  15  -1   0  714.53   33.50
  15  -1   0  663.43   40.00
  15  -1   0  607.44   26.40
  15  -1   0  687.63   36.70
 -15   1   0  674.63   34.50
 -15   1   0  675.43   37.60
 -15   1   0  630.24   36.10
 -15   1   0  672.83   41.20
 -15   1   0  669.73   34.90
 -15   1   0  644.94   34.30
  14  -1   0   61.79    5.70
  14  -1   0   67.79   15.10
  14  -1   0   76.49   10.90
  14  -1   0   83.09   13.30
 -14   1   0   44.30    9.00
 -14   1   0   37.40    8.70
 -14   1   0   70.59   11.50
 -14   1   0   61.99   11.10
 -14   1   0   38.50    8.80
 -14   1   0   70.19   12.40
 -14   1   0   56.79   12.20
  13  -1   0  666.53   31.00
  13  -1   0  609.64   28.20
  13  -1   0  622.04   26.40
  13  -1   0  657.23   33.80
  13  -1   0  643.04   37.60
  13  -1   0  626.14   33.20
 -13   1   0  630.24   33.50
 -13   1   0  665.93   37.90
 -13   1   0  632.64   34.30
 -13   1   0  648.24   32.50
 -13   1   0  603.84   33.80
 -13   1   0  650.63   32.20
 -13   1   0  660.63   32.60
  12  -1   0  328.17   23.10
  12  -1   0  274.77   13.50
  12  -1   0  280.87   19.40
  12  -1   0  306.57   17.50
  12  -1   0  266.67   18.40
  12  -1   0  264.07   21.20
  12  -1   0  261.07   14.90
 -12   1   0  300.37   23.00
 -12   1   0  295.87   25.40
 -12   1   0  291.77   22.60
 -12   1   0  249.97   17.20
 -12   1   0  255.47   18.00
 -12   1   0  280.27   19.70
 -12   1   0  274.97   19.80
 -12   1   0  247.98   21.90
  11  -1   0    9.40    4.40
  11  -1   0   13.20    3.50
  11  -1   0   10.00    2.50
  11  -1   0   13.10    5.10
  11  -1   0   19.50    5.20
  11  -1   0   20.30    5.30
  11  -1   0   16.40    5.50
  11  -1   0   20.50    7.70
 -11   1   0   24.20    7.80
 -11   1   0   22.00    5.30
 -11   1   0   24.00    6.00
 -11   1   0   14.00    5.80
 -11   1   0   10.20    4.70
 -11   1   0   11.60    5.30
 -11   1   0   24.10    5.40
  10  -1   0   -1.60    2.30
  10  -1   0    6.10    3.90
  10  -1   0    3.60    3.60
  10  -1   0    5.10    2.60
  10  -1   0    4.80    3.50
  10  -1   0    3.60    4.70
  10  -1   0    1.10    2.30
  10  -1   0    3.10    1.80
  10  -1   0   -0.70    4.00
 -10   1   0    0.30    3.90
 -10   1   0    4.00    3.10
 -10   1   0    4.40    3.40
 -10   1   0    5.20    3.90
 -10   1   0    3.80    3.30
 -10   1   0   -0.10    2.80
 -10   1   0    4.40    4.20
 -10   1   0    2.80    3.20
   9  -1   0  585.74   24.80
   9  -1   0  628.64   27.30
   9  -1   0  596.04   25.60
   9  -1   0  661.13   27.30
   9  -1   0  675.93   32.20
   9  -1   0  536.05   28.00
   9  -1   0  595.44   27.50
   9  -1   0  594.84   30.90
   9  -1   0  632.94   29.00
  -9   1   0  573.14   27.40
  -9   1   0  547.45   28.80
  -9   1   0  589.84   28.30
  -9   1   0  600.04   32.10
  -9   1   0  642.54   31.90
  -9   1   0  594.74   27.80
  -9   1   0  616.34   27.80
  -9   1   0  627.64   29.40
   8  -1   0  669.33   28.10
   8  -1   0  670.03   32.00
   8  -1   0  597.14   34.70
   8  -1   0  633.84   28.00
   8  -1   0  762.62   33.00
   8  -1   0  642.14   28.50
   8  -1   0  651.03   26.90
   8  -1   0  691.33   30.10
  -8   1   0  652.03   29.90
  -8   1   0  699.03   32.50
  -8   1   0  617.34   28.60
  -8   1   0  618.84   29.00
  -8   1   0  639.84   28.40
  -8   1   0  603.54   28.20
  -8   1   0  622.44   32.30
  -8   1   0  635.94   29.90
  -8   1   0  664.33   27.20
   7  -1   0  931.31   38.00
   7  -1   0  888.31   43.70
   7  -1   0  901.61   38.60
   7  -1   0  899.21   39.10
   7  -1   0  959.20   37.40
   7  -1   0  938.41   39.00
   7  -1   0  997.20   41.30
   7  -1   0  955.30   36.50
   7  -1   0  958.40   37.90
  -7   1   0  939.51   37.80
  -7   1   0  905.81   38.00
  -7   1   0  862.51   37.50
  -7   1   0  904.01   39.00
  -7   1   0  940.11   39.20
  -7   1   0  945.51   41.30
  -7   1   0  922.41   38.40
  -7   1   0  948.41   36.60
   6  -1   0 7831.22  273.17
   6  -1   0 7635.64  271.17
   6  -1   0 7341.47  269.87
   6  -1   0 7586.94  269.67
   6  -1   0 7682.73  269.57
   6  -1   0 7015.40  272.47
   6  -1   0 7117.69  270.67
   6  -1   0 7429.66  270.27
   6  -1   0 7560.44  268.87
  -6   1   0 7616.84  273.27
  -6   1   0 7047.10  269.67
  -6   1   0 7383.06  269.87
  -6   1   0 7461.45  268.97
  -6   1   0 7717.93  270.47
  -6   1   0 7557.54  270.37
  -6   1   0 7615.74  271.27
  -6   1   0 7538.35  271.27
  -6   1   0 7051.19  273.17
   5  -1   0   25.90    4.50
   5  -1   0   25.20    3.60
   5  -1   0   22.70    3.00
   5  -1   0   38.40    4.40
   5  -1   0   23.60    4.70
   5  -1   0   37.30    3.80
   5  -1   0   25.00    3.40
   5  -1   0   23.70    3.80
   5  -1   0   30.60    3.70
  -5   1   0   27.80    3.90
  -5   1   0   24.40    4.10
  -5   1   0   25.00    3.90
  -5   1   0   28.50    3.20
  -5   1   0   33.30    3.90
  -5   1   0   27.60    4.60
  -5   1   0   32.30    5.20
  -5   1   0   30.70    4.30
  -5   1   0   23.90    3.40
   4  -1   0 7471.45  266.07
   4  -1   0 7471.85  267.37
   4  -1   0 7468.75  267.37
  -4   1   0 7214.78  267.47
  -4   1   0 7196.18  265.17
   3  -1   0 5389.96  198.38
   3  -1   0 5543.25  198.48
   1  -1   0  874.61   32.40
   1  -1   0  902.51   32.50
   1  -1   0  903.01   32.30
   1  -1   0  852.51   31.90
  -1   1   0  824.72   32.10
  -1   1   0  848.62   32.20
  -1   1   0  929.71   32.50
  -1  -1   0   82.09    4.10
  -1  -1   0   85.39    3.80
  -1  -1   0   91.29    4.40
   1   1   0   91.39    4.50
  -2  -1   0  716.43   26.10
  -2  -1   0  649.43   25.80
  -2  -1   0  687.03   25.90
  -2  -1   0  686.43   26.40
  -2  -1   0  711.83   27.40
  -2  -1   0  683.43   27.10
   2   1   0  722.43   27.30
   2   1   0  670.43   26.10
   2   1   0  687.93   26.50
   2   1   0  695.73   25.90
   2   1   0  709.93   26.00
   2   1   0  680.73   26.40
  -3  -1   0 2892.81  103.89
  -3  -1   0 2887.51  103.99
  -3  -1   0 2755.72  105.39
  -3  -1   0 2866.51  103.69
  -3  -1   0 2751.22  104.39
  -3  -1   0 2796.22  103.49
  -3  -1   0 2639.64  104.29
  -3  -1   0 2799.72  105.69
   3   1   0 2867.31  103.89
   3   1   0 2852.01  105.59
   3   1   0 2871.01  104.49
   3   1   0 2904.71  103.49
   3   1   0 2917.91  103.89
   3   1   0 3078.49  105.89
   3   1   0 2943.81  103.69
  -4  -1   0   14.80    2.30
  -4  -1   0    8.00    1.80
  -4  -1   0   17.00    2.80
  -4  -1   0   12.80    2.40
  -4  -1   0   13.10    2.60
  -4  -1   0   13.30    2.90
  -4  -1   0    5.50    2.00
  -4  -1   0   14.00    3.40
   4   1   0    8.60    2.10
   4   1   0    8.70    2.20
   4   1   0   11.00    1.90
   4   1   0   10.30    2.10
   4   1   0    9.20    2.00
   4   1   0    9.10    1.80
   4   1   0    9.40    2.70
   4   1   0   16.40    2.00
  -5  -1   0 8378.36  315.97
  -5  -1   0 8813.42  315.97
  -5  -1   0 8596.34  312.77
  -5  -1   0 8567.64  314.07
   5   1   0 8586.34  313.87
   5   1   0 8232.68  315.47
   5   1   0 9584.24  316.17
  -6  -1   0  199.48   10.90
  -6  -1   0  171.88   10.30
  -6  -1   0  190.68   11.40
  -6  -1   0  187.58   12.90
  -6  -1   0  186.98   13.00
  -6  -1   0  175.98   11.10
  -6  -1   0  179.08   10.30
  -6  -1   0  206.18   10.30
   6   1   0  181.78   12.60
   6   1   0  202.28   13.10
   6   1   0  189.28   10.10
   6   1   0  199.28   10.60
   6   1   0  186.48    9.10
   6   1   0  179.58   10.30
   6   1   0  184.38    9.30
   6   1   0  186.28   11.40
  -7  -1   0 2670.73  100.29
  -7  -1   0 2509.95  101.09
  -7  -1   0 2653.03   99.19
  -7  -1   0 2704.63   99.69
  -7  -1   0 2614.84  100.99
  -7  -1   0 2673.93  106.99
  -7  -1   0 2660.03   99.69
   7   1   0 2683.23   99.19
   7   1   0 2771.52   99.89
   7   1   0 2698.53   97.89
   7   1   0 2580.44  100.89
   7   1   0 2662.13  103.49
   7   1   0 2648.54   97.99
   7   1   0 2741.83  100.99
   7   1   0 2784.82  103.59
   7   1   0 2541.35   99.49
  -8  -1   0    9.60    2.70
  -8  -1   0   12.60    3.70
  -8  -1   0   13.10    4.50
  -8  -1   0   10.70    3.50
  -8  -1   0   17.70    3.90
  -8  -1   0   12.50    3.70
  -8  -1   0    9.20    3.40
  -8  -1   0    9.50    3.90
   8   1   0   13.60    3.30
   8   1   0   19.50    5.50
   8   1   0    9.60    2.30
   8   1   0   13.70    3.30
   8   1   0   15.40    3.80
   8   1   0    6.60    3.00
   8   1   0   18.50    5.50
   8   1   0   10.00    3.10
   8   1   0   15.90    3.70
  -9  -1   0 1136.69   50.59
  -9  -1   0 1143.99   48.10
  -9  -1   0 1153.28   46.20
  -9  -1   0 1031.90   50.89
  -9  -1   0 1098.69   45.40
  -9  -1   0 1115.99   48.20
  -9  -1   0 1077.59   46.70
  -9  -1   0 1090.69   46.00
   9   1   0 1212.98   51.19
   9   1   0 1146.79   45.40
   9   1   0 1109.49   47.30
   9   1   0 1096.69   46.10
   9   1   0 1054.89   45.60
   9   1   0 1138.09   43.70
   9   1   0 1099.89   50.29
   9   1   0 1192.08   50.89
   9   1   0 1146.69   43.70
 -10  -1   0  148.19   11.20
 -10  -1   0  172.08   16.00
 -10  -1   0  130.69   12.30
 -10  -1   0  148.49   12.50
 -10  -1   0  164.88   12.10
 -10  -1   0  154.38   11.60
 -10  -1   0  144.29   15.10
 -10  -1   0  164.28   13.50
  10   1   0  166.78   14.80
  10   1   0  150.78    9.20
  10   1   0  171.98   15.60
  10   1   0  164.98   12.10
  10   1   0  172.18   13.40
  10   1   0  149.29    9.60
  10   1   0  180.78   11.90
  10   1   0  161.78   11.40
  10   1   0  136.89   12.10
 -11  -1   0  101.99   11.20
 -11  -1   0   83.49   10.40
 -11  -1   0   76.89   11.40
 -11  -1   0   68.19   10.20
 -11  -1   0   83.49    9.00
 -11  -1   0   91.39   13.20
 -11  -1   0   91.09    9.80
  11   1   0  106.59   11.40
  11   1   0   87.29   13.20
  11   1   0   80.59    6.90
  11   1   0   99.19   11.00
  11   1   0   95.39    9.70
  11   1   0   76.19   11.30
  11   1   0   85.29    8.50
 -12  -1   0   26.00    6.90
 -12  -1   0   33.40    6.80
 -12  -1   0   47.30   11.50
 -12  -1   0   18.70    5.60
 -12  -1   0   17.90    4.80
 -12  -1   0   17.90    6.00
 -12  -1   0   42.00    8.50
 -12  -1   0   42.00    9.50
  12   1   0   23.40    4.30
  12   1   0   31.40    6.40
  12   1   0   33.70    7.20
  12   1   0   26.60    6.80
  12   1   0   25.00    8.10
  12   1   0   34.40    7.00
  12   1   0   33.40    5.00
  12   1   0   29.00    6.70
 -13  -1   0   68.29   10.70
 -13  -1   0   56.49   11.30
 -13  -1   0   65.29   13.40
 -13  -1   0   62.99   12.20
 -13  -1   0   80.49   12.20
 -13  -1   0   52.39    9.30
 -13  -1   0   54.09    9.90
  13   1   0   66.29   11.60
  13   1   0   64.79   10.00
  13   1   0   82.59   14.10
  13   1   0   50.79    6.80
  13   1   0   70.09    6.40
  13   1   0   64.29   10.50
 -14  -1   0   94.99   13.90
 -14  -1   0  103.89   12.90
 -14  -1   0  108.19   13.80
 -14  -1   0  106.99   12.50
 -14  -1   0  101.49   16.80
 -14  -1   0   92.89   14.60
 -14  -1   0   86.09   11.20
  14   1   0   81.99    7.10
  14   1   0  102.09   16.80
  14   1   0  105.99   13.30
  14   1   0  102.59    8.90
  14   1   0   94.59   14.10
  14   1   0   96.29   11.70
 -15  -1   0  123.59   15.00
 -15  -1   0  105.59   13.10
 -15  -1   0  100.49   13.00
 -15  -1   0  105.39   15.60
 -15  -1   0  105.09   17.80
 -15  -1   0   98.29   13.20
  15   1   0  100.59   12.60
  15   1   0  101.89   16.50
  15   1   0   92.39    7.40
  15   1   0  114.79    9.30
 -16  -1   0  283.27   21.80
 -16  -1   0  290.87   26.40
 -16  -1   0  303.97   27.40
 -16  -1   0  271.57   24.10
 -16  -1   0  295.27   20.90
  16   1   0  314.97   24.80
  16   1   0  346.47   31.70
  16   1   0  349.57   27.70
  16  -2   0  119.49   19.20
  16  -2   0   77.89   14.00
 -16   2   0   79.29   14.60
 -16   2   0   71.19   12.60
 -16   2   0   93.09   13.50
 -16   2   0   86.79   14.50
 -16   2   0   44.40   17.50
  15  -2   0    5.10    5.10
  15  -2   0    6.70    2.00
  15  -2   0   14.50    7.30
  15  -2   0   15.50    8.40
 -15   2   0   14.10    7.50
 -15   2   0    4.10    5.30
 -15   2   0    7.50    6.90
 -15   2   0   -0.50    3.80
 -15   2   0   12.00    6.40
 -15   2   0   12.20    6.60
  14  -2   0   20.70    4.20
  14  -2   0   19.10    8.10
  14  -2   0   23.20    7.70
  14  -2   0   23.10    6.40
 -14   2   0   22.50    7.70
 -14   2   0   18.90    6.80
 -14   2   0   15.30    6.00
 -14   2   0   22.80    9.10
 -14   2   0   17.40    6.60
 -14   2   0   10.30    4.50
  13  -2   0  197.58   14.80
  13  -2   0  191.68   10.70
  13  -2   0  208.58   20.30
  13  -2   0  204.78   17.40
  13  -2   0  227.08   16.70
 -13   2   0  225.38   17.00
 -13   2   0  190.38   17.50
 -13   2   0  185.78   17.10
 -13   2   0  182.38   22.70
 -13   2   0  213.18   20.20
 -13   2   0  187.48   15.10
 -13   2   0  198.38   16.00
 -13   2   0  186.48   16.90
  12  -2   0  887.21   37.30
  12  -2   0  951.60   43.80
  12  -2   0  959.20   47.20
  12  -2   0  979.50   47.60
  12  -2   0 1066.89   48.40
  12  -2   0  957.20   39.50
  12  -2   0  977.60   41.30
 -12   2   0  916.41   44.70
 -12   2   0 1019.70   48.50
 -12   2   0  924.71   45.90
 -12   2   0  918.01   43.00
 -12   2   0  909.11   41.60
 -12   2   0  903.91   48.20
 -12   2   0  938.81   44.50
 -12   2   0  928.71   52.49
  11  -2   0  114.19   11.70
  11  -2   0  112.99    7.70
  11  -2   0  132.09   15.30
  11  -2   0  126.49   12.60
  11  -2   0   87.69    9.90
  11  -2   0  117.59   14.40
  11  -2   0  133.29   10.70
  11  -2   0  116.59    9.20
  11  -2   0  120.49   10.60
 -11   2   0  112.99   11.80
 -11   2   0  101.89   13.30
 -11   2   0  103.19   13.90
 -11   2   0  110.49   11.80
 -11   2   0  126.59   12.10
 -11   2   0  122.79   12.00
 -11   2   0  109.99   11.40
  10  -2   0 1988.70   79.09
  10  -2   0 2005.30   80.49
  10  -2   0 2141.89   78.59
  10  -2   0 2213.28   84.49
  10  -2   0 1983.70   90.39
  10  -2   0 2030.70   75.79
  10  -2   0 1885.21   82.89
  10  -2   0 2089.09   78.69
  10  -2   0 2158.88   77.19
 -10   2   0 1906.81   79.39
 -10   2   0 2034.80   82.19
 -10   2   0 2009.80   77.69
 -10   2   0 2079.99   84.39
 -10   2   0 2008.90   80.29
 -10   2   0 1846.72   84.09
 -10   2   0 1969.00   79.79
 -10   2   0 1981.20   79.19
 -10   2   0 2023.50   81.19
   9  -2   0  146.39   12.90
   9  -2   0  135.29   13.30
   9  -2   0  139.19   11.60
   9  -2   0  145.99   10.70
   9  -2   0  135.29   10.00
   9  -2   0  129.59   10.80
   9  -2   0  132.79    9.10
   9  -2   0  129.09    9.70
  -9   2   0  128.09   11.70
  -9   2   0  126.99   13.00
  -9   2   0  131.89   13.10
  -9   2   0  154.38    9.40
  -9   2   0  128.79   11.40
  -9   2   0  130.69   10.10
  -9   2   0  137.29   10.60
  -9   2   0  143.19   11.20
  -9   2   0  148.09   11.50
   8  -2   0 2091.99   77.69
   8  -2   0 2007.20   79.99
   8  -2   0 2110.69   78.59
   8  -2   0 2066.19   79.09
   8  -2   0 2021.10   82.59
   8  -2   0 2036.30   79.59
   8  -2   0 2284.37   83.59
   8  -2   0 1934.11   78.29
   8  -2   0 2129.09   80.59
  -8   2   0 1940.41   78.79
  -8   2   0 2121.39   80.09
  -8   2   0 2099.69   79.99
  -8   2   0 1932.11   82.99
  -8   2   0 2060.49   80.59
  -8   2   0 2077.89   83.19
  -8   2   0 2073.19   79.19
  -8   2   0 2069.59   77.99
  -8   2   0 2108.29   80.89
   7  -2   0  282.07   14.40
   7  -2   0  294.17   15.20
   7  -2   0  281.17   15.40
   7  -2   0  300.57   13.90
   7  -2   0  282.37   15.70
   7  -2   0  284.37   15.70
   7  -2   0  274.57   14.50
   7  -2   0  260.17   16.60
   7  -2   0  292.57   17.40
  -7   2   0  289.77   13.90
  -7   2   0  262.77   14.40
  -7   2   0  295.07   17.30
  -7   2   0  301.77   16.00
  -7   2   0  294.27   14.90
  -7   2   0  301.07   15.90
  -7   2   0  325.47   15.70
  -7   2   0  269.77   17.30
  -7   2   0  278.37   17.40
   6  -2   0 1091.29   44.30
   6  -2   0 1155.98   43.50
   6  -2   0 1135.79   43.80
   6  -2   0 1064.39   46.10
   6  -2   0 1072.99   42.80
   6  -2   0 1063.89   44.40
   6  -2   0 1154.28   46.60
   6  -2   0 1138.79   44.90
   6  -2   0 1141.79   43.50
  -6   2   0 1127.59   44.50
  -6   2   0 1128.89   46.80
  -6   2   0 1080.49   43.60
  -6   2   0 1160.78   45.10
  -6   2   0 1131.99   44.30
  -6   2   0 1037.80   46.40
  -6   2   0 1129.89   43.00
  -6   2   0 1139.29   43.90
  -6   2   0 1106.09   44.90
   5  -2   0   56.99    5.50
   5  -2   0   57.99    6.40
   5  -2   0   48.80    5.80
   5  -2   0   56.59    4.80
   5  -2   0   49.90    5.10
   5  -2   0   56.19    4.60
   5  -2   0   55.09    4.50
   5  -2   0   55.39    5.50
   5  -2   0   59.29    5.00
  -5   2   0   57.09    5.00
  -5   2   0   74.49    6.00
  -5   2   0   64.39    4.70
  -5   2   0   55.19    4.80
  -5   2   0   59.49    5.30
  -5   2   0   57.99    5.60
  -5   2   0   57.89    5.50
   4  -2   0  164.68    9.90
   4  -2   0  161.98    8.70
   4  -2   0  175.18    8.90
   4  -2   0  175.08    9.80
   4  -2   0  160.08    8.10
   4  -2   0  154.58    8.20
   4  -2   0  168.48    8.30
  -4   2   0  155.68    8.80
  -4   2   0  160.08    8.20
  -4   2   0  176.98   10.00
  -4   2   0  162.38    8.30
  -4   2   0  155.98    8.80
  -4   2   0  164.58    9.00
  -4   2   0  161.58    8.10
  -4   2   0  168.88    8.60
  -4   2   0  159.98    9.90
   3  -2   0  364.86   15.20
   3  -2   0  372.96   16.60
   3  -2   0  380.36   15.70
   3  -2   0  391.36   16.60
   3  -2   0  375.06   15.20
   3  -2   0  369.66   15.80
   3  -2   0  388.16   15.30
   3  -2   0  366.76   15.70
   3  -2   0  364.96   15.00
  -3   2   0  386.56   15.90
  -3   2   0  348.17   15.70
  -3   2   0  371.66   15.20
  -3   2   0  371.16   15.30
  -3   2   0  355.56   15.30
  -3   2   0  379.16   16.70
  -3   2   0  377.66   16.60
  -3   2   0  372.96   15.20
  -3   2   0  361.16   15.80
   2  -2   0    8.00    1.90
   2  -2   0   10.60    2.00
   2  -2   0    8.50    1.40
   2  -2   0    7.30    1.50
  -2   2   0   10.40    1.80
  -2   2   0   13.00    2.00
  -2   2   0   11.70    1.70
  -2   2   0   10.90    1.80
  -2   2   0    8.80    1.50
  -2   2   0   13.20    1.70
  -2   2   0   13.20    2.20
  -2   2   0   11.00    1.60
   1  -2   0 1631.64   58.29
   1  -2   0 1618.34   58.39
   1  -2   0 1597.74   58.19
   1  -2   0 1603.04   57.49
   1  -2   0 1576.04   57.79
   1  -2   0 1617.04   58.09
   1  -2   0 1571.44   57.39
   1  -2   0 1596.54   57.89
   1  -2   0 1650.13   57.69
  -1   2   0 1551.34   57.59
  -1   2   0 1583.24   57.59
  -1   2   0 1609.64   57.89
  -1   2   0 1599.14   57.89
  -1   2   0 1599.94   58.19
  -1   2   0 1617.74   58.29
  -1   2   0 1507.85   58.19
  -1   2   0 1452.05   57.29
  -1   2   0 1629.94   58.29
   0  -2   0 1405.46   50.49
   0  -2   0 1441.36   50.09
   0  -2   0 1398.26   50.89
   0  -2   0 1322.17   50.89
   0  -2   0 1435.46   50.19
   0  -2   0 1423.16   50.79
   0  -2   0 1391.96   50.49
   0  -2   0 1390.56   50.69
   0  -2   0 1463.45   50.29
   0   2   0 1396.26   50.69
   0   2   0 1264.97   50.19
   0   2   0 1388.16   50.99
   0   2   0 1292.87   50.49
   0   2   0 1446.66   50.79
   0   2   0 1406.76   50.49
   0   2   0 1344.17   50.29
  -2  -2   0  308.47   12.60
  -2  -2   0  323.67   13.90
  -2  -2   0  318.77   12.40
  -2  -2   0  312.67   13.80
  -2  -2   0  317.87   12.40
  -2  -2   0  293.37   12.90
  -2  -2   0  298.47   13.00
  -2  -2   0  308.47   12.80
   2   2   0  312.27   12.40
   2   2   0  317.87   13.90
   2   2   0  307.87   12.40
   2   2   0  301.17   13.70
   2   2   0  308.17   12.80
  -3  -2   0 4446.96  166.28
  -3  -2   0 4429.56  167.38
  -3  -2   0 4560.84  166.28
  -3  -2   0 4362.66  167.48
   3   2   0 4769.52  165.48
   3   2   0 4829.12  167.78
   3   2   0 4517.95  167.48
   3   2   0 4616.64  166.38
   3   2   0 4646.33  165.78
   3   2   0 4660.43  165.58
  -4  -2   0  286.57   13.00
  -4  -2   0  291.57   13.30
  -4  -2   0  305.87   13.00
  -4  -2   0  298.17   14.00
  -4  -2   0  304.27   15.20
  -4  -2   0  305.47   13.40
  -4  -2   0  311.67   15.50
  -4  -2   0  280.97   13.90
   4   2   0  307.37   14.00
   4   2   0  313.17   15.40
   4   2   0  298.07   13.30
   4   2   0  297.37   14.10
   4   2   0  299.57   13.00
   4   2   0  276.67   13.20
  -5  -2   0 2592.24   98.79
  -5  -2   0 2626.84  100.19
  -5  -2   0 2744.03  102.09
  -5  -2   0 2608.14  102.29
  -5  -2   0 2659.03   98.39
  -5  -2   0 2584.74   99.99
  -5  -2   0 2627.04   99.09
  -5  -2   0 2728.93   99.29
   5   2   0 2654.93  101.99
   5   2   0 2822.22   98.89
   5   2   0 2596.04   98.99
   5   2   0 2965.80  102.39
   5   2   0 2683.43  100.29
   5   2   0 2590.14   98.29
   5   2   0 2667.33   99.19
   5   2   0 2778.22  100.09
  -6  -2   0   42.40    5.80
  -6  -2   0   51.99    5.30
  -6  -2   0   49.99    5.80
  -6  -2   0   43.20    4.80
  -6  -2   0   50.69    5.50
  -6  -2   0   48.30    4.70
  -6  -2   0   52.09    7.10
  -6  -2   0   36.30    6.30
   6   2   0   53.09    5.30
   6   2   0   52.49    5.30
   6   2   0   48.80    4.20
   6   2   0   50.19    4.50
   6   2   0   54.79    6.20
   6   2   0   55.29    6.00
   6   2   0   53.49    7.00
   6   2   0   48.00    7.10
   6   2   0   49.50    5.20
  -7  -2   0   46.70    7.50
  -7  -2   0   46.80    6.10
  -7  -2   0   52.79    5.20
  -7  -2   0   62.79    7.10
  -7  -2   0   47.90    5.70
  -7  -2   0   46.20    5.20
  -7  -2   0   41.00    6.40
  -7  -2   0   58.59    9.60
   7   2   0   51.39    4.80
   7   2   0   67.89    7.20
   7   2   0   48.80    5.60
   7   2   0   45.10    6.30
   7   2   0   42.50    7.20
   7   2   0   48.60    4.50
   7   2   0   51.19    5.90
   7   2   0   58.49    8.20
   7   2   0   44.80    5.40
  -8  -2   0    8.20    4.10
  -8  -2   0    7.20    3.80
  -8  -2   0    6.00    2.40
  -8  -2   0    9.90    3.00
  -8  -2   0   11.20    3.50
  -8  -2   0    7.90    4.30
  -8  -2   0   17.20    4.50
  -8  -2   0    5.30    3.10
   8   2   0    7.60    2.90
   8   2   0    7.00    2.00
   8   2   0   15.20    5.00
   8   2   0    6.10    3.20
   8   2   0    4.10    2.20
   8   2   0    6.50    3.40
   8   2   0   21.70    6.40
   8   2   0    3.90    2.70
  -9  -2   0   67.59    8.80
  -9  -2   0   72.39   10.90
  -9  -2   0   71.39    7.80
  -9  -2   0   68.49    9.20
  -9  -2   0   70.29    8.20
  -9  -2   0   67.09    7.00
  -9  -2   0   75.09    7.70
  -9  -2   0   53.59    9.60
   9   2   0   61.09    7.40
   9   2   0   67.09    8.60
   9   2   0   79.39    7.80
   9   2   0   79.39    7.90
   9   2   0   73.89    9.00
   9   2   0   60.59   10.30
   9   2   0   76.19    6.10
   9   2   0   73.29    6.20
   9   2   0   62.59    9.50
 -10  -2   0  489.85   26.30
 -10  -2   0  511.95   24.30
 -10  -2   0  501.35   24.40
 -10  -2   0  484.65   26.10
 -10  -2   0  463.55   28.80
 -10  -2   0  520.65   29.20
 -10  -2   0  489.95   23.10
 -10  -2   0  492.95   25.30
  10   2   0  500.25   25.80
  10   2   0  491.35   21.70
  10   2   0  500.45   23.70
  10   2   0  457.65   23.80
  10   2   0  482.15   24.20
  10   2   0  507.25   28.80
  10   2   0  503.65   21.70
  10   2   0  439.76   25.30
  10   2   0  510.25   28.90
 -11  -2   0  104.79   12.40
 -11  -2   0  124.49   12.10
 -11  -2   0  118.79   14.90
 -11  -2   0  112.39   10.00
 -11  -2   0   92.59   13.10
 -11  -2   0  103.19   11.90
 -11  -2   0  123.09   11.30
  11   2   0  125.59    8.50
  11   2   0  126.49   12.60
  11   2   0  127.99   14.90
  11   2   0  118.39   10.60
  11   2   0  153.68   15.10
  11   2   0  103.69   11.50
  11   2   0  119.29    9.60
  11   2   0  124.99   11.20
 -12  -2   0 1049.59   57.19
 -12  -2   0 1235.98   51.99
 -12  -2   0 1291.37   54.09
 -12  -2   0 1289.27   58.19
 -12  -2   0 1205.88   56.29
 -12  -2   0 1288.27   55.89
 -12  -2   0 1321.37   60.09
  12   2   0 1307.07   49.80
  12   2   0 1177.48   55.19
  12   2   0 1295.07   59.09
  12   2   0 1234.98   53.49
  12   2   0 1334.57   60.29
  12   2   0 1290.77   55.49
  12   2   0 1244.88   49.40
 -13  -2   0  177.18   15.00
 -13  -2   0  188.28   15.10
 -13  -2   0  179.58   16.60
 -13  -2   0  183.98   22.20
 -13  -2   0  154.78   16.00
 -13  -2   0  156.78   13.10
 -13  -2   0  172.98   15.70
  13   2   0  152.48   10.20
  13   2   0  174.58   16.50
  13   2   0  183.58   14.00
  13   2   0  188.78   19.40
  13   2   0  203.78   16.50
  13   2   0  176.78   11.20
 -14  -2   0  837.62   39.10
 -14  -2   0  931.31   48.30
 -14  -2   0  892.21   41.10
 -14  -2   0  776.12   54.49
 -14  -2   0  824.62   43.00
 -14  -2   0  854.61   42.10
 -14  -2   0  820.32   42.30
  14   2   0  850.41   39.60
  14   2   0  836.22   35.80
  14   2   0  855.61   42.90
  14   2   0  873.51   42.90
  14   2   0  950.30   48.00
 -15  -2   0   -4.10    3.90
 -15  -2   0   -4.20    3.60
 -15  -2   0    6.10    5.50
 -15  -2   0   -5.20    3.40
 -15  -2   0    6.10    7.10
 -15  -2   0    0.60    6.70
  15   2   0    7.10    6.70
  15   2   0    0.70    5.50
  15   2   0    1.80    2.80
  15   2   0    0.80    6.00
 -16  -2   0  155.68   18.80
 -16  -2   0  153.78   16.30
 -16  -2   0  193.68   21.80
 -16  -2   0  151.98   23.60
  16   2   0  205.98   22.00
  16   2   0  157.28   10.80
  16   2   0  118.19    8.90
  16   2   0  168.98   15.50
  16   2   0  144.99   17.90
  16  -3   0  323.37   24.70
  16  -3   0  363.26   29.20
  16  -3   0  402.26   28.20
 -16   3   0  331.87   25.80
 -16   3   0  368.36   29.40
 -16   3   0  288.17   21.20
 -16   3   0  332.07   24.40
 -16   3   0  319.27   24.00
  15  -3   0   45.60    4.60
  15  -3   0   75.59   11.30
  15  -3   0   70.69   16.60
  15  -3   0   43.80    9.60
 -15   3   0   75.39   13.10
 -15   3   0   33.30    6.80
 -15   3   0   58.59   12.10
 -15   3   0   46.20   11.60
 -15   3   0   44.50    9.70
 -15   3   0   43.60    8.80
  14  -3   0  903.01   43.70
  14  -3   0  836.62   34.60
  14  -3   0  885.21   47.20
  14  -3   0  953.00   40.60
 -14   3   0  877.31   44.20
 -14   3   0  893.51   48.20
 -14   3   0  851.11   42.90
 -14   3   0  842.62   43.30
 -14   3   0  849.41   43.80
 -14   3   0  893.21   40.70
 -14   3   0  883.31   42.40
  13  -3   0    8.10    6.80
  13  -3   0   -1.90    4.90
  13  -3   0    0.20    4.20
  13  -3   0    1.60    2.00
 -13   3   0   -5.00    4.70
 -13   3   0    2.80    4.50
 -13   3   0    3.40    4.60
 -13   3   0    0.80    4.90
 -13   3   0    3.20    5.40
 -13   3   0    1.70    4.30
 -13   3   0    6.40    5.70
 -13   3   0    1.10    3.30
  12  -3   0 1116.39   46.10
  12  -3   0 1150.78   53.69
  12  -3   0 1038.20   42.30
  12  -3   0 1082.09   48.80
  12  -3   0 1081.29   48.50
  12  -3   0 1139.09   52.49
 -12   3   0 1036.80   59.69
 -12   3   0 1082.59   46.30
 -12   3   0 1112.99   48.80
 -12   3   0 1001.40   56.69
 -12   3   0  973.10   53.29
 -12   3   0 1119.39   47.90
 -12   3   0 1058.89   49.40
 -12   3   0 1077.99   49.40
  11  -3   0  281.67   16.60
  11  -3   0  286.97   16.80
  11  -3   0  293.07   21.60
  11  -3   0  289.27   19.00
  11  -3   0  294.87   18.50
  11  -3   0  283.27   20.50
 -11   3   0  278.47   21.50
 -11   3   0  273.17   21.60
 -11   3   0  275.47   19.00
 -11   3   0  283.67   19.00
 -11   3   0  275.97   17.70
 -11   3   0  290.77   19.00
 -11   3   0  286.77   15.90
 -11   3   0  253.37   17.90
  10  -3   0  305.87   16.00
  10  -3   0  304.77   16.60
  10  -3   0  283.37   16.30
  10  -3   0  294.97   20.20
  10  -3   0  310.27   18.80
  10  -3   0  305.37   21.10
  10  -3   0  295.37   17.40
  10  -3   0  302.07   18.30
 -10   3   0  307.67   19.10
 -10   3   0  307.27   16.00
 -10   3   0  297.27   18.30
 -10   3   0  286.87   17.50
 -10   3   0  326.47   19.00
 -10   3   0  303.07   19.30
 -10   3   0  296.57   21.50
 -10   3   0  298.27   21.20
   9  -3   0   49.50    9.30
   9  -3   0   45.20    7.60
   9  -3   0   42.80    6.60
   9  -3   0   33.90    5.70
   9  -3   0   43.40    5.90
   9  -3   0   49.10    6.40
   9  -3   0   37.00    6.50
   9  -3   0   35.60    6.90
   9  -3   0   39.50    7.90
  -9   3   0   33.60    7.10
  -9   3   0   36.70    7.20
  -9   3   0   37.40    5.30
  -9   3   0   25.10    6.30
  -9   3   0   34.60    6.60
  -9   3   0   48.80    7.80
  -9   3   0   37.60    6.30
  -9   3   0   46.20    7.50
  -9   3   0   34.40    8.00
   8  -3   0    8.80    3.30
   8  -3   0   11.30    3.30
   8  -3   0    9.20    3.70
   8  -3   0   11.60    3.40
   8  -3   0    8.60    3.10
   8  -3   0    8.20    3.10
   8  -3   0   10.00    2.80
   8  -3   0    8.40    4.70
   8  -3   0    7.50    3.70
  -8   3   0   19.40    4.10
  -8   3   0   10.50    3.90
  -8   3   0   19.40    5.70
  -8   3   0   10.60    4.10
  -8   3   0    8.00    3.00
  -8   3   0   13.60    4.00
  -8   3   0   16.40    3.70
  -8   3   0   12.20    3.80
  -8   3   0   12.50    3.90
   7  -3   0  280.97   15.10
   7  -3   0  280.47   14.30
   7  -3   0  294.57   15.50
   7  -3   0  259.97   16.30
   7  -3   0  265.77   13.90
   7  -3   0  304.47   17.40
   7  -3   0  262.47   13.60
   7  -3   0  294.87   14.20
  -7   3   0  234.98   16.30
  -7   3   0  262.07   15.30
  -7   3   0  286.57   14.70
  -7   3   0  273.67   14.30
  -7   3   0  286.17   15.00
  -7   3   0  293.27   17.30
  -7   3   0  272.67   15.40
  -7   3   0  279.47   13.80
  -7   3   0  293.77   15.80
   6  -3   0  176.68   10.40
   6  -3   0  159.68   10.20
   6  -3   0  177.28   12.00
   6  -3   0  175.98    9.60
   6  -3   0  159.28    9.50
   6  -3   0  167.98   11.50
   6  -3   0  157.28    9.10
   6  -3   0  155.68   10.10
  -6   3   0  164.78    9.10
  -6   3   0  162.98    9.50
  -6   3   0  171.38   10.70
  -6   3   0  158.58   10.20
  -6   3   0  162.98   11.60
  -6   3   0  157.08   10.40
  -6   3   0  155.88    9.90
  -6   3   0  146.69   11.30
   5  -3   0 1195.88   48.10
   5  -3   0 1228.68   47.10
   5  -3   0 1205.68   46.70
   5  -3   0 1133.99   46.70
   5  -3   0 1238.58   49.30
   5  -3   0 1266.17   47.10
   5  -3   0 1275.07   49.70
   5  -3   0 1228.98   47.90
   5  -3   0 1246.08   47.90
  -5   3   0 1212.08   48.20
  -5   3   0 1186.28   49.50
  -5   3   0 1172.18   48.00
  -5   3   0 1288.97   47.10
  -5   3   0 1223.78   47.20
  -5   3   0 1291.67   49.90
  -5   3   0 1218.98   47.20
  -5   3   0 1234.78   47.50
  -5   3   0 1245.28   48.20
   4  -3   0  656.53   27.10
   4  -3   0  677.83   26.40
   4  -3   0  664.83   26.20
   4  -3   0  658.53   27.20
   4  -3   0  642.64   27.80
   4  -3   0  635.94   25.90
   4  -3   0  654.53   27.50
   4  -3   0  636.94   26.70
   4  -3   0  722.73   28.70
  -4   3   0  652.33   28.20
  -4   3   0  667.93   27.20
  -4   3   0  682.73   26.50
  -4   3   0  653.13   26.40
  -4   3   0  637.74   27.00
  -4   3   0  686.43   26.40
  -4   3   0  616.04   26.30
  -4   3   0  714.93   28.60
  -4   3   0  673.73   27.40
   3  -3   0 2740.93   98.59
   3  -3   0 2615.14   97.09
   3  -3   0 2738.63   98.19
   3  -3   0 2613.64   96.49
   3  -3   0 2650.43   97.89
   3  -3   0 2663.33   96.69
   3  -3   0 2522.05   97.49
   3  -3   0 2641.54   96.69
   3  -3   0 2618.34   97.49
  -3   3   0 2582.84   98.19
  -3   3   0 2707.03   97.49
  -3   3   0 2844.12   97.09
  -3   3   0 2624.44   98.29
  -3   3   0 2693.23   97.39
  -3   3   0 2566.54   96.69
  -3   3   0 2600.44   97.79
  -3   3   0 2674.03   96.79
  -3   3   0 2658.73   96.79
   2  -3   0   29.70    3.10
   2  -3   0   31.60    3.30
   2  -3   0   33.80    2.40
   2  -3   0   32.70    3.10
   2  -3   0   32.20    3.10
   2  -3   0   31.00    2.60
   2  -3   0   32.40    2.70
   2  -3   0   31.40    2.30
   2  -3   0   30.50    2.90
  -2   3   0   29.00    2.40
  -2   3   0   28.80    3.00
  -2   3   0   28.90    2.80
  -2   3   0   30.30    3.20
  -2   3   0   32.90    3.30
  -2   3   0   33.10    2.70
  -2   3   0   28.10    3.10
  -2   3   0   28.50    3.00
  -2   3   0   29.10    2.60
   1  -3   0 1130.19   40.60
   1  -3   0 1097.89   40.00
   1  -3   0 1129.89   41.20
   1  -3   0 1124.19   41.40
   1  -3   0 1116.29   41.30
   1  -3   0 1087.89   40.70
   1  -3   0 1089.59   39.60
   1  -3   0 1107.79   40.30
   1  -3   0 1122.29   41.40
   1  -3   0 1056.69   41.00
  -1   3   0 1087.39   40.50
  -1   3   0 1121.09   40.90
  -1   3   0 1105.19   41.30
  -1   3   0 1102.79   40.50
  -1   3   0 1077.49   41.30
  -1   3   0 1124.59   41.40
  -1   3   0 1055.89   40.00
  -1   3   0 1073.69   40.90
  -1   3   0 1111.49   41.30
   0  -3   0   22.50    1.70
   0  -3   0   18.90    2.40
   0  -3   0   25.60    2.10
   0  -3   0   20.80    1.90
   0  -3   0   22.40    2.30
   0  -3   0   25.80    1.80
   0  -3   0   22.90    2.30
   0  -3   0   23.60    2.30
   0   3   0   22.20    2.10
   0   3   0   22.40    2.10
   0   3   0   25.90    2.40
   0   3   0   23.50    2.20
   0   3   0   23.10    2.40
   0   3   0   22.90    1.90
   0   3   0   22.20    1.90
  -1  -3   0 3222.48  120.29
  -1  -3   0 3307.97  120.19
  -1  -3   0 3308.97  119.89
  -1  -3   0 3195.58  119.69
  -1  -3   0 3336.47  120.59
  -1  -3   0 3307.47  120.89
  -1  -3   0 3386.76  119.69
  -1  -3   0 3342.17  120.99
   1   3   0 3306.57  119.79
   1   3   0 3274.77  119.99
   1   3   0 3462.25  120.29
   1   3   0 3175.58  120.19
   1   3   0 3291.87  120.79
   1   3   0 3384.06  120.69
   1   3   0 3372.26  119.79
   1   3   0 3440.26  119.29
   1   3   0 3383.06  120.99
  -2  -3   0   11.00    1.70
  -2  -3   0   16.30    2.20
  -2  -3   0   13.10    2.60
  -2  -3   0   15.40    2.40
  -2  -3   0   15.60    2.20
  -2  -3   0   13.20    2.30
  -2  -3   0   12.90    2.00
  -2  -3   0   14.20    1.50
  -2  -3   0   14.50    1.70
   2   3   0   13.90    2.20
   2   3   0   13.30    1.90
   2   3   0   15.10    2.80
   2   3   0   13.20    1.70
   2   3   0   15.10    2.10
   2   3   0   14.00    2.20
   2   3   0   11.80    2.40
   2   3   0   11.70    2.20
  -3  -3   0   10.80    2.10
  -3  -3   0    7.30    1.70
  -3  -3   0   11.00    2.00
  -3  -3   0    6.50    2.10
  -3  -3   0   10.90    2.40
  -3  -3   0   10.40    2.50
  -3  -3   0   13.10    2.60
   3   3   0   14.20    2.50
   3   3   0   16.00    2.50
   3   3   0    9.70    2.40
   3   3   0   10.30    1.90
   3   3   0   12.70    2.40
   3   3   0    8.60    2.30
   3   3   0   12.70    2.20
   3   3   0    7.60    1.80
  -4  -3   0   68.39    5.30
  -4  -3   0   71.29    4.80
  -4  -3   0   63.09    4.90
  -4  -3   0   63.89    4.80
  -4  -3   0   85.49    6.90
  -4  -3   0   69.79    6.40
  -4  -3   0   65.29    5.40
  -4  -3   0   63.39    4.90
   4   3   0   67.19    6.20
   4   3   0   64.59    4.90
   4   3   0   62.29    4.70
   4   3   0   69.49    5.00
   4   3   0   71.89    6.60
   4   3   0   69.89    5.60
   4   3   0   65.89    4.80
   4   3   0   61.99    5.40
  -5  -3   0  342.97   16.90
  -5  -3   0  355.76   15.90
  -5  -3   0  345.27   16.10
  -5  -3   0  344.77   17.00
  -5  -3   0  361.36   16.00
  -5  -3   0  363.46   16.20
  -5  -3   0  343.37   18.40
   5   3   0  388.16   16.20
   5   3   0  389.06   19.00
   5   3   0  331.67   16.20
   5   3   0  370.76   17.20
   5   3   0  348.87   18.60
   5   3   0  367.96   16.00
   5   3   0  367.56   16.20
  -6  -3   0  392.76   19.10
  -6  -3   0  363.76   17.10
  -6  -3   0  381.46   16.70
  -6  -3   0  389.66   17.80
  -6  -3   0  380.16   17.80
  -6  -3   0  369.96   20.80
  -6  -3   0  382.66   20.60
  -6  -3   0  367.06   17.30
   6   3   0  374.36   18.80
   6   3   0  386.66   17.70
   6   3   0  415.76   19.00
   6   3   0  414.46   21.10
   6   3   0  408.46   17.40
   6   3   0  372.56   17.80
  -7  -3   0  131.09    9.10
  -7  -3   0  138.59   10.50
  -7  -3   0  124.39    8.70
  -7  -3   0  119.69   11.50
  -7  -3   0  125.49   11.90
  -7  -3   0  134.19    8.20
  -7  -3   0  129.79   10.20
  -7  -3   0  135.89    9.50
   7   3   0  141.49    9.20
   7   3   0  139.49    8.40
   7   3   0  142.99    9.10
   7   3   0  113.69   11.00
   7   3   0  130.49    9.20
   7   3   0  153.68    8.10
   7   3   0  153.08   11.50
   7   3   0  140.39   10.20
  -8  -3   0 2266.57   94.59
  -8  -3   0 2506.15   93.89
  -8  -3   0 2338.47   96.89
  -8  -3   0 2415.26  100.49
  -8  -3   0 2535.05  100.09
  -8  -3   0 2520.55   97.09
  -8  -3   0 2548.74   95.29
  -8  -3   0 2570.24   95.89
   8   3   0 2722.13  100.19
   8   3   0 2634.34   93.29
   8   3   0 2418.06   95.19
   8   3   0 2668.63   94.99
   8   3   0 2676.73   96.99
   8   3   0 2531.75   97.29
   8   3   0 2476.95   95.19
   8   3   0 2440.96   93.69
   8   3   0 2461.65   99.79
  -9  -3   0   91.89    7.60
  -9  -3   0   92.79   12.00
  -9  -3   0  104.69   10.40
  -9  -3   0   98.49    9.30
  -9  -3   0   97.49    9.00
  -9  -3   0   83.99   11.20
  -9  -3   0   95.99    8.50
  -9  -3   0   85.69    9.10
   9   3   0  112.89   10.40
   9   3   0   93.59    8.70
   9   3   0   95.69   11.40
   9   3   0   93.89    6.90
   9   3   0   64.49    9.00
   9   3   0   98.19    8.80
   9   3   0   87.29    8.60
   9   3   0   91.49    7.20
   9   3   0   98.09   11.80
 -10  -3   0 2348.57   88.69
 -10  -3   0 2294.97   89.49
 -10  -3   0 2303.27   91.59
 -10  -3   0 2209.38   88.99
 -10  -3   0 2251.47   90.69
 -10  -3   0 2328.27   94.49
 -10  -3   0 2164.38   95.09
 -10  -3   0 2267.87   88.49
  10   3   0 2234.68   90.79
  10   3   0 2243.38   94.19
  10   3   0 2310.17   85.59
  10   3   0 2184.88   89.19
  10   3   0 2488.45   94.69
  10   3   0 2341.47   87.89
  10   3   0 2397.36   90.59
  10   3   0 2204.58   88.59
  10   3   0 2256.57   86.19
 -11  -3   0   23.40    5.90
 -11  -3   0   26.00    7.20
 -11  -3   0   23.60    5.80
 -11  -3   0   24.30    5.20
 -11  -3   0   47.20    8.60
 -11  -3   0   51.49   11.60
 -11  -3   0   35.00    6.40
  11   3   0   36.90    7.20
  11   3   0   39.50    5.70
  11   3   0   35.60    7.50
  11   3   0   34.20    8.10
  11   3   0   30.30    6.90
  11   3   0   36.50    7.50
  11   3   0   47.70    5.60
  11   3   0   42.40   10.50
 -12  -3   0  364.36   21.10
 -12  -3   0  353.96   21.70
 -12  -3   0  382.46   23.20
 -12  -3   0  321.77   21.90
 -12  -3   0  381.96   28.60
 -12  -3   0  325.97   24.10
 -12  -3   0  365.76   25.90
 -12  -3   0  341.57   18.80
 -12  -3   0  308.07   25.10
  12   3   0  330.37   24.60
  12   3   0  349.17   22.70
  12   3   0  378.56   26.00
  12   3   0  327.17   20.40
  12   3   0  350.76   22.20
  12   3   0  371.26   22.40
  12   3   0  337.97   17.00
 -13  -3   0   15.50    6.30
 -13  -3   0   10.00    4.60
 -13  -3   0   25.30    6.00
 -13  -3   0   27.60    7.30
 -13  -3   0   22.40    5.00
 -13  -3   0   26.90    6.50
  13   3   0   15.50    8.30
  13   3   0   21.30    6.30
  13   3   0   14.30    6.00
  13   3   0   19.30    7.00
  13   3   0   22.10    4.10
  13   3   0   21.80    4.90
 -14  -3   0    4.90    5.80
 -14  -3   0   -0.10    5.40
 -14  -3   0   -3.00    3.50
 -14  -3   0   -3.60    3.60
 -14  -3   0    2.80    3.90
 -14  -3   0    0.60    5.60
  14   3   0    2.70    4.90
  14   3   0    5.50    6.10
  14   3   0    6.30    7.20
  14   3   0   -2.80    5.40
  14   3   0   -1.60    2.10
  14   3   0    1.40    2.90
 -15  -3   0   20.80    9.10
 -15  -3   0   12.00    6.00
 -15  -3   0   11.00    4.40
 -15  -3   0   14.50    7.10
 -15  -3   0   13.20    6.40
 -15  -3   0   10.90    6.30
  15   3   0   15.60    8.20
  15   3   0   14.30    6.10
  15   3   0   16.40    7.70
  15   3   0   10.60    3.70
  15   3   0    5.00    3.00
 -16  -3   0   78.99   15.50
 -16  -3   0   62.39   16.10
 -16  -3   0   56.39   12.60
 -16  -3   0   47.90   10.20
 -16  -3   0   74.79   16.70
  16   3   0   71.49   15.00
  16   3   0   58.79    7.30
  16   3   0   55.29   10.70
  16   3   0   52.19   12.90
  16   3   0   46.50    6.60
  16  -4   0  374.96   31.90
  16  -4   0  270.07   23.70
  16  -4   0  302.27   24.00
  16  -4   0  263.67   25.60
 -16   4   0  278.57   23.10
 -16   4   0  301.17   23.10
 -16   4   0  285.67   26.50
 -16   4   0  293.67   20.00
 -16   4   0  279.47   23.70
  15  -4   0   36.20    7.80
  15  -4   0   29.20    8.90
  15  -4   0   51.39   12.70
  15  -4   0   38.00    4.50
  15  -4   0   26.00    7.30
 -15   4   0   65.29   11.90
 -15   4   0   33.20    8.30
 -15   4   0   64.99   14.10
 -15   4   0   48.30   12.50
 -15   4   0   48.80   10.30
  14  -4   0  105.39   11.90
  14  -4   0   94.49   16.40
  14  -4   0   72.19    6.60
  14  -4   0   83.19   13.80
 -14   4   0   88.39   13.40
 -14   4   0   94.29   15.30
 -14   4   0  102.09   15.00
 -14   4   0  113.69   13.30
 -14   4   0   81.99   10.50
 -14   4   0  109.19   13.30
  13  -4   0   10.10    7.30
  13  -4   0    1.20    4.40
  13  -4   0   12.50    5.50
  13  -4   0    6.70    2.30
 -13   4   0   10.00    5.20
 -13   4   0    9.20    5.90
 -13   4   0    7.10    4.70
 -13   4   0   13.40    5.50
 -13   4   0    9.10    4.40
 -13   4   0    5.90    8.70
 -13   4   0   15.30    7.70
 -13   4   0    9.90    6.80
  12  -4   0   76.39   10.10
  12  -4   0   92.39   14.80
  12  -4   0   74.69   11.50
  12  -4   0   88.69   10.00
 -12   4   0   65.49   13.30
 -12   4   0   65.39    8.10
 -12   4   0   70.19   10.80
 -12   4   0   70.99   11.80
 -12   4   0   83.69   12.10
 -12   4   0   69.09   10.60
 -12   4   0   71.09   12.50
 -12   4   0   66.29   12.40
 -12   4   0   68.99    8.90
  11  -4   0  116.19   11.60
  11  -4   0  136.99   11.20
  11  -4   0  163.18   16.10
  11  -4   0  145.29   10.90
  11  -4   0  145.39   13.10
 -11   4   0  113.29    9.60
 -11   4   0  135.89   12.30
 -11   4   0  117.29   12.80
 -11   4   0  131.59   13.30
 -11   4   0  111.89   12.40
 -11   4   0  100.09   11.90
 -11   4   0  156.48   16.00
 -11   4   0  119.79   14.20
 -11   4   0  103.19   10.00
  10  -4   0  297.07   17.40
  10  -4   0  308.97   16.90
  10  -4   0  320.87   19.40
  10  -4   0  282.57   17.50
  10  -4   0  302.17   16.60
  10  -4   0  339.67   21.80
  10  -4   0  271.17   17.50
 -10   4   0  302.07   16.20
 -10   4   0  305.97   17.90
 -10   4   0  291.77   20.90
 -10   4   0  279.67   17.50
 -10   4   0  288.17   18.60
 -10   4   0  306.57   19.10
 -10   4   0  295.77   18.50
 -10   4   0  308.17   21.50
 -10   4   0  292.37   18.30
   9  -4   0  962.30   37.90
   9  -4   0  877.41   38.20
   9  -4   0  908.01   39.30
   9  -4   0  854.31   38.90
   9  -4   0  909.11   41.90
   9  -4   0  956.30   40.20
   9  -4   0  958.50   42.70
   9  -4   0  897.61   37.50
  -9   4   0  862.31   38.50
  -9   4   0  921.61   40.40
  -9   4   0  899.61   42.70
  -9   4   0  914.01   40.10
  -9   4   0  911.21   40.20
  -9   4   0  907.61   38.40
  -9   4   0  896.41   37.40
  -9   4   0  778.52   41.50
  -9   4   0  883.51   39.20
   8  -4   0  271.17   17.50
   8  -4   0  257.57   15.10
   8  -4   0  256.27   14.20
   8  -4   0  252.57   16.70
   8  -4   0  274.37   14.20
   8  -4   0  269.37   13.90
   8  -4   0  253.27   15.00
   8  -4   0  264.47   15.70
  -8   4   0  261.67   14.60
  -8   4   0  267.97   16.00
  -8   4   0  245.28   17.20
  -8   4   0  249.38   14.20
  -8   4   0  250.17   15.60
  -8   4   0  208.78   16.20
  -8   4   0  255.27   15.10
  -8   4   0  237.08   13.40
  -8   4   0  235.78   14.90
   7  -4   0 2579.44   91.49
   7  -4   0 2453.05   94.89
   7  -4   0 2234.08   92.09
   7  -4   0 2495.55   95.29
   7  -4   0 2333.27   92.69
   7  -4   0 2475.65   93.19
   7  -4   0 2335.07   91.49
   7  -4   0 2466.45   91.19
  -7   4   0 2265.17   94.89
  -7   4   0 2430.06   93.29
  -7   4   0 2478.15   91.39
  -7   4   0 2452.55   92.39
  -7   4   0 2516.35   95.69
  -7   4   0 2510.05   92.09
  -7   4   0 2395.46   91.69
  -7   4   0 2554.24   93.39
  -7   4   0 2427.46   93.49
   6  -4   0   10.10    3.20
   6  -4   0    6.00    3.40
   6  -4   0    6.40    3.20
   6  -4   0    6.30    2.80
   6  -4   0   10.40    2.90
   6  -4   0    9.40    2.40
   6  -4   0    6.60    2.20
   6  -4   0    8.00    3.00
  -6   4   0    9.50    3.20
  -6   4   0    7.90    3.80
  -6   4   0   11.10    2.60
  -6   4   0    7.90    2.80
  -6   4   0    4.20    3.90
  -6   4   0    9.30    3.00
  -6   4   0   10.20    3.10
  -6   4   0    7.80    2.50
  -6   4   0   12.00    4.10
   5  -4   0 4381.06  160.48
   5  -4   0 4215.98  158.18
   5  -4   0 4370.36  157.68
   5  -4   0 4435.36  157.58
   5  -4   0 4585.44  159.58
   5  -4   0 4142.99  158.58
   5  -4   0 4021.70  159.48
   5  -4   0 4525.25  157.28
   5  -4   0 4244.78  158.78
  -5   4   0 4430.36  158.98
  -5   4   0 4102.09  159.98
  -5   4   0 4438.56  157.98
  -5   4   0 4335.67  157.78
  -5   4   0 4515.65  158.08
  -5   4   0 3924.91  158.38
  -5   4   0 4353.16  160.48
  -5   4   0 4188.08  159.18
  -5   4   0 4590.34  157.98
   4  -4   0  497.55   19.90
   4  -4   0  497.95   22.10
   4  -4   0  495.05   21.00
   4  -4   0  492.95   20.50
   4  -4   0  492.65   21.00
   4  -4   0  475.25   21.50
   4  -4   0  480.25   19.60
   4  -4   0  492.45   21.50
   4  -4   0  469.85   19.90
  -4   4   0  479.85   22.00
  -4   4   0  480.75   20.10
  -4   4   0  502.55   21.00
  -4   4   0  478.75   21.80
  -4   4   0  476.65   20.20
  -4   4   0  460.35   20.00
  -4   4   0  463.15   20.00
  -4   4   0  485.95   21.40
  -4   4   0  451.65   20.60
   3  -4   0 1098.99   40.50
   3  -4   0 1021.20   41.70
   3  -4   0 1093.79   40.20
   3  -4   0 1085.99   41.50
   3  -4   0 1089.69   41.40
   3  -4   0 1095.19   42.40
   3  -4   0 1018.60   40.70
   3  -4   0 1091.29   41.90
   3  -4   0 1085.69   40.20
  -3   4   0 1042.10   40.40
  -3   4   0 1066.99   40.30
  -3   4   0 1084.79   41.90
  -3   4   0 1062.29   41.20
  -3   4   0 1119.89   41.40
  -3   4   0 1085.69   40.60
  -3   4   0 1053.29   40.90
  -3   4   0  973.80   41.70
  -3   4   0 1086.99   42.30
   2  -4   0   61.49    4.80
   2  -4   0   63.49    4.80
   2  -4   0   56.99    4.00
   2  -4   0   59.69    3.60
   2  -4   0   61.89    3.50
   2  -4   0   60.79    4.60
   2  -4   0   58.19    3.90
   2  -4   0   60.59    4.50
   2  -4   0   61.99    4.40
  -2   4   0   55.89    3.80
  -2   4   0   56.19    4.50
  -2   4   0   57.89    4.70
  -2   4   0   65.09    4.90
  -2   4   0   61.19    4.30
  -2   4   0   64.89    3.60
  -2   4   0   58.49    4.70
   1  -4   0  158.98    8.00
   1  -4   0  165.08    7.80
   1  -4   0  165.68    8.40
   1  -4   0  157.18    7.10
   1  -4   0  173.08    8.60
   1  -4   0  169.48    7.70
   1  -4   0  170.38    6.60
   1  -4   0  181.38    8.30
   1  -4   0  175.58    8.40
   1  -4   0  155.28    6.40
   1  -4   0  169.58    7.50
  -1   4   0  153.58    7.40
  -1   4   0  165.98    8.40
  -1   4   0  158.68    8.20
  -1   4   0  156.88    8.20
  -1   4   0  157.28    7.80
  -1   4   0  156.48    7.90
  -1   4   0  172.48    8.50
  -1   4   0  168.38    7.50
   0  -4   0  264.67   10.80
   0  -4   0  275.37   10.80
   0  -4   0  273.07   11.90
   0  -4   0  265.37   11.50
   0  -4   0  266.67   12.10
   0  -4   0  262.27   12.30
   0  -4   0  266.47   11.10
   0  -4   0  275.17   11.40
   0  -4   0  274.97   12.00
   0   4   0  265.67   11.20
   0   4   0  271.57   12.00
   0   4   0  257.47   11.60
   0   4   0  280.37   11.60
   0   4   0  268.47   12.10
   0   4   0  277.87   11.60
   0   4   0  270.07   12.10
   0   4   0  265.07   11.10
  -1  -4   0 1051.69   39.30
  -1  -4   0 1005.00   38.30
  -1  -4   0 1069.59   38.80
  -1  -4   0 1045.80   38.40
  -1  -4   0  978.40   38.70
  -1  -4   0 1032.50   39.70
  -1  -4   0 1074.69   37.20
  -1  -4   0  985.60   39.60
  -1  -4   0  959.20   38.00
   1   4   0 1010.90   38.80
   1   4   0 1033.30   39.20
   1   4   0 1052.49   37.40
   1   4   0 1031.10   38.40
   1   4   0 1009.10   38.80
   1   4   0 1018.00   38.40
   1   4   0 1049.20   38.30
   1   4   0 1023.30   39.60
   1   4   0 1059.39   39.50
  -2  -4   0 2227.38   77.39
  -2  -4   0 2027.20   77.69
  -2  -4   0 2153.08   77.59
  -2  -4   0 2113.59   79.29
  -2  -4   0 2072.89   79.79
  -2  -4   0 2076.09   78.09
  -2  -4   0 2030.30   78.69
  -2  -4   0 2215.88   79.39
  -2  -4   0 2148.69   78.59
   2   4   0 2224.28   78.09
   2   4   0 2197.68   78.79
   2   4   0 2154.88   78.39
   2   4   0 2085.79   79.69
   2   4   0 2092.09   77.49
   2   4   0 2097.49   79.19
   2   4   0 2136.09   77.59
   2   4   0 2184.18   79.29
   2   4   0 2159.88   78.79
  -3  -4   0  592.14   24.30
  -3  -4   0  610.44   22.60
  -3  -4   0  572.34   24.90
  -3  -4   0  581.34   23.50
  -3  -4   0  564.74   22.60
  -3  -4   0  575.04   23.80
  -3  -4   0  561.84   23.70
  -3  -4   0  557.04   23.00
  -3  -4   0  566.54   22.00
   3   4   0  554.34   23.70
   3   4   0  529.95   24.60
   3   4   0  585.64   22.90
   3   4   0  567.34   23.70
   3   4   0  564.94   22.60
   3   4   0  627.84   25.50
   3   4   0  589.34   23.30
   3   4   0  560.14   23.60
  -4  -4   0 2549.65   93.89
  -4  -4   0 2553.24   93.49
  -4  -4   0 2586.34   96.59
  -4  -4   0 2490.95   95.19
  -4  -4   0 2554.04   94.39
  -4  -4   0 2537.95   94.79
  -4  -4   0 2642.14   93.59
   4   4   0 2474.65   94.89
   4   4   0 2444.56   93.99
   4   4   0 2427.96   96.29
   4   4   0 2529.95   93.59
   4   4   0 2585.94   94.79
   4   4   0 2610.24   96.79
   4   4   0 2463.75   94.29
   4   4   0 2711.73   93.89
  -5  -4   0   69.59    5.70
  -5  -4   0   66.49    5.40
  -5  -4   0   67.19    5.90
  -5  -4   0   61.29    5.50
  -5  -4   0   58.99    4.90
  -5  -4   0   55.89    6.70
  -5  -4   0   68.19    6.00
   5   4   0   58.89    6.00
   5   4   0   70.39    7.20
   5   4   0   58.29    5.30
   5   4   0   63.59    5.40
   5   4   0   63.49    5.70
   5   4   0   61.99    5.30
   5   4   0   61.79    6.10
  -6  -4   0 2598.44   96.29
  -6  -4   0 2566.84  111.39
  -6  -4   0 2484.15   95.89
  -6  -4   0 2569.24   97.79
  -6  -4   0 2491.15   97.59
  -6  -4   0 2650.03   96.49
  -6  -4   0 2597.94   99.99
   6   4   0 2770.12  100.49
   6   4   0 2559.34   96.09
   6   4   0 2601.84   96.39
   6   4   0 2656.33   98.19
   6   4   0 2562.74   96.29
   6   4   0 2611.84   97.69
   6   4   0 2465.25   99.79
   6   4   0 2526.35   98.09
  -7  -4   0    0.40    2.00
  -7  -4   0    2.20    2.70
  -7  -4   0    4.70    2.10
  -7  -4   0    3.20    2.70
  -7  -4   0    3.70    1.80
  -7  -4   0    0.40    2.60
  -7  -4   0    4.20    2.90
  -7  -4   0    3.50    3.30
  -7  -4   0    5.20    2.40
   7   4   0    3.00    1.80
   7   4   0    1.50    2.20
   7   4   0    7.10    4.20
   7   4   0    2.30    2.50
   7   4   0    1.10    2.20
   7   4   0    0.50    2.30
   7   4   0    1.60    1.90
   7   4   0    5.40    3.40
  -8  -4   0  861.91   38.50
  -8  -4   0  892.31   37.40
  -8  -4   0  843.52   36.50
  -8  -4   0  843.62   36.90
  -8  -4   0  878.71   35.30
  -8  -4   0  902.01   39.00
  -8  -4   0  914.21   41.60
  -8  -4   0  866.01   41.90
   8   4   0  918.31   36.80
   8   4   0  907.91   38.50
   8   4   0  798.82   40.60
   8   4   0  845.82   37.10
   8   4   0  982.90   42.00
   8   4   0  913.61   35.30
   8   4   0  856.01   38.60
   8   4   0  893.31   36.20
   8   4   0  872.61   37.00
  -9  -4   0    9.60    4.50
  -9  -4   0   12.10    3.80
  -9  -4   0   10.70    4.00
  -9  -4   0   12.10    4.40
  -9  -4   0   13.80    5.50
  -9  -4   0   10.30    3.70
  -9  -4   0    5.70    4.70
  -9  -4   0   13.30    3.10
   9   4   0   15.10    3.10
   9   4   0   16.20    4.90
   9   4   0   10.70    4.20
   9   4   0    9.30    4.70
   9   4   0   15.80    3.20
   9   4   0    7.10    3.00
   9   4   0   15.50    6.10
   9   4   0   16.40    4.80
   9   4   0   11.80    3.90
 -10  -4   0    3.40    2.90
 -10  -4   0    9.80    5.70
 -10  -4   0    3.50    3.30
 -10  -4   0   -2.20    3.50
 -10  -4   0    2.20    4.60
 -10  -4   0    2.20    2.40
 -10  -4   0    6.30    4.10
 -10  -4   0    7.10    5.30
  10   4   0    3.40    3.60
  10   4   0   -2.80    2.30
  10   4   0    3.00    2.20
  10   4   0    5.80    4.30
  10   4   0    6.30    3.80
  10   4   0    6.40    5.20
  10   4   0    0.20    4.20
 -11  -4   0    3.60    5.00
 -11  -4   0   10.90    4.00
 -11  -4   0   11.40    4.80
 -11  -4   0   15.80    5.10
 -11  -4   0    7.70    5.90
 -11  -4   0    1.60    4.60
 -11  -4   0   12.90    3.40
  11   4   0   15.70    3.30
  11   4   0   11.60    5.10
  11   4   0    2.10    4.40
  11   4   0    7.80    4.60
  11   4   0   12.00    4.10
  11   4   0    8.40    2.80
  11   4   0   22.10    7.20
  11   4   0    9.40    6.50
 -12  -4   0  201.38   16.90
 -12  -4   0  249.58   18.60
 -12  -4   0  236.08   14.20
 -12  -4   0  250.17   21.30
 -12  -4   0  239.98   18.70
 -12  -4   0  254.57   20.30
 -12  -4   0  203.08   24.80
  12   4   0  241.88   16.70
  12   4   0  237.98   17.50
  12   4   0  226.58   15.70
  12   4   0  224.28   13.30
  12   4   0  211.28   20.10
  12   4   0  221.08   17.70
  12   4   0  236.28   13.20
 -13  -4   0  257.97   15.90
 -13  -4   0  282.27   19.00
 -13  -4   0  252.97   19.10
 -13  -4   0  255.77   20.00
 -13  -4   0  274.27   20.40
 -13  -4   0  258.67   19.20
  13   4   0  265.07   23.20
  13   4   0  289.97   18.20
  13   4   0  236.58   14.20
  13   4   0  237.78   14.20
  13   4   0  257.47   19.60
  13   4   0  301.77   20.80
 -14  -4   0  139.19   14.80
 -14  -4   0  197.28   17.50
 -14  -4   0  156.28   19.60
 -14  -4   0  123.09   14.90
 -14  -4   0  156.48   15.40
 -14  -4   0  150.88   12.30
  14   4   0  136.89   14.90
  14   4   0  163.88   19.70
  14   4   0  159.18   10.70
  14   4   0  152.88   14.50
  14   4   0  142.89   16.30
  14   4   0  146.09   10.50
 -15  -4   0  423.16   27.50
 -15  -4   0  420.06   23.20
 -15  -4   0  468.85   26.80
 -15  -4   0  493.65   33.30
 -15  -4   0  438.76   29.00
  15   4   0  383.96   20.40
  15   4   0  430.76   20.90
  15   4   0  421.56   28.10
  15   4   0  445.86   32.10
  15   4   0  449.86   25.20
 -16  -4   0    6.60    4.60
 -16  -4   0   23.40    9.30
 -16  -4   0   11.20   10.30
 -16  -4   0   17.40    9.10
 -16  -4   0   10.90    8.10
  16   4   0    8.80    3.50
  16   4   0   20.10   11.40
  16   4   0   12.00    3.70
  16   4   0   23.00    6.70
  16   4   0    5.00    7.30
  16  -5   0   91.19   16.80
  16  -5   0  100.69   16.10
  16  -5   0  134.39   19.90
 -16   5   0   90.69   17.00
 -16   5   0   92.99   17.20
 -16   5   0   82.89   15.40
 -16   5   0   86.59   12.00
 -16   5   0   84.19   14.60
  15  -5   0   62.99   10.70
  15  -5   0   22.70    4.00
  15  -5   0   19.60    7.50
  15  -5   0   25.70    9.80
  15  -5   0   38.90    8.80
 -15   5   0   20.60    5.80
 -15   5   0   38.70    9.70
 -15   5   0   25.50    7.60
 -15   5   0   28.00    8.10
 -15   5   0   25.70    8.50
 -15   5   0   36.70    8.60
  14  -5   0   34.20    7.90
  14  -5   0   58.99   10.30
  14  -5   0   33.90    8.00
  14  -5   0   48.10    5.50
  14  -5   0   69.39   15.10
 -14   5   0   50.49    8.70
 -14   5   0   39.20   10.10
 -14   5   0   55.89   11.80
 -14   5   0   36.70    8.50
 -14   5   0   58.99   11.80
 -14   5   0   59.79   13.10
  13  -5   0  666.93   36.70
  13  -5   0  638.44   32.90
  13  -5   0  594.94   29.10
  13  -5   0  624.84   33.60
 -13   5   0  575.34   32.80
 -13   5   0  578.14   38.30
 -13   5   0  545.15   31.60
 -13   5   0  601.84   33.20
 -13   5   0  582.54   28.60
 -13   5   0  547.35   28.50
 -13   5   0  594.04   32.20
 -13   5   0  616.14   31.80
 -13   5   0  633.34   37.20
  12  -5   0  209.28   14.90
  12  -5   0  221.48   19.90
  12  -5   0  211.38   17.70
  12  -5   0  189.98   17.10
  12  -5   0  214.08   16.70
 -12   5   0  200.48   19.70
 -12   5   0  199.48   16.20
 -12   5   0  218.08   20.20
 -12   5   0  195.88   17.50
 -12   5   0  183.68   13.60
 -12   5   0  218.08   14.10
 -12   5   0  215.98   16.70
 -12   5   0  225.28   17.00
  11  -5   0 1666.03   69.49
  11  -5   0 1537.05   67.09
  11  -5   0 1763.22   67.39
  11  -5   0 1832.42   73.99
  11  -5   0 1738.03   70.79
  11  -5   0 1730.43   71.29
  11  -5   0 1779.72   69.89
 -11   5   0 1702.43   66.49
 -11   5   0 1727.73   71.19
 -11   5   0 1718.23   74.49
 -11   5   0 1697.53   67.19
 -11   5   0 1724.13   71.29
 -11   5   0 1573.74   69.79
 -11   5   0 1748.72   69.39
 -11   5   0 1634.24   68.79
 -11   5   0 1559.44   73.29
 -11   5   0 1625.94   69.59
  10  -5   0    3.30    3.30
  10  -5   0    2.50    3.70
  10  -5   0    1.30    2.90
  10  -5   0    2.70    3.80
  10  -5   0    3.20    4.20
  10  -5   0    2.20    2.50
  10  -5   0   -1.50    2.80
  10  -5   0    1.20    4.20
 -10   5   0    1.70    3.70
 -10   5   0    1.10    4.00
 -10   5   0   -3.40    3.40
 -10   5   0   -3.00    2.10
 -10   5   0    3.30    3.70
 -10   5   0    0.90    3.20
 -10   5   0    0.20    2.50
 -10   5   0    1.60    5.10
 -10   5   0    0.60    3.60
   9  -5   0  988.00   43.80
   9  -5   0 1067.19   46.70
   9  -5   0 1009.40   42.30
   9  -5   0 1063.59   44.70
   9  -5   0  954.30   43.00
   9  -5   0  960.20   45.50
   9  -5   0 1026.60   41.70
   9  -5   0 1026.40   41.60
   9  -5   0  943.61   43.20
  -9   5   0 1018.60   42.90
  -9   5   0 1063.99   43.70
  -9   5   0 1016.50   41.80
  -9   5   0 1053.09   44.80
  -9   5   0 1001.70   46.90
  -9   5   0  899.31   45.70
  -9   5   0 1091.29   45.30
  -9   5   0  981.80   42.20
  -9   5   0 1021.30   44.00
   8  -5   0   38.60    6.30
   8  -5   0   36.90    7.00
   8  -5   0   41.80    6.50
   8  -5   0   49.60    7.70
   8  -5   0   41.50    6.10
   8  -5   0   29.70    6.90
   8  -5   0   36.00    8.30
   8  -5   0   45.30    6.90
   8  -5   0   34.80    5.80
  -8   5   0   49.99    8.40
  -8   5   0   37.20    8.30
  -8   5   0   38.90    6.90
  -8   5   0   51.89    8.00
  -8   5   0   33.40    6.10
  -8   5   0   39.40    6.80
  -8   5   0   43.10    6.00
  -8   5   0   48.70    7.90
  -8   5   0   36.60    5.30
   7  -5   0   48.00    6.00
   7  -5   0   49.50    5.50
   7  -5   0   70.89    8.00
   7  -5   0   49.20    8.10
   7  -5   0   56.79    7.20
   7  -5   0   56.59    6.40
   7  -5   0   61.69    7.10
   7  -5   0   60.29    6.20
   7  -5   0   43.20    7.00
  -7   5   0   50.99    6.70
  -7   5   0   51.69    7.40
  -7   5   0   45.90    7.80
  -7   5   0   67.49    6.10
  -7   5   0   67.99    7.50
  -7   5   0   54.39    6.60
  -7   5   0   50.29    5.70
  -7   5   0   58.89    7.60
  -7   5   0   51.99    7.20
   6  -5   0   79.69    7.60
   6  -5   0   79.19    7.80
   6  -5   0   74.69    7.30
   6  -5   0   75.29    6.10
   6  -5   0   76.29    8.70
   6  -5   0   97.39    8.50
   6  -5   0   75.69    7.90
   6  -5   0   73.99    7.00
   6  -5   0   77.79    6.60
  -6   5   0   87.69    7.10
  -6   5   0   89.69    9.10
  -6   5   0   88.19    7.80
  -6   5   0   89.49    8.40
  -6   5   0   69.49    7.80
  -6   5   0   79.69    7.10
  -6   5   0   95.89    7.00
  -6   5   0   81.39    7.80
  -6   5   0   80.59    6.70
   5  -5   0   34.90    5.10
   5  -5   0   24.60    5.60
   5  -5   0   24.70    4.60
   5  -5   0   32.10    4.60
   5  -5   0   19.90    3.80
   5  -5   0   30.60    3.70
   5  -5   0   29.30    4.10
   5  -5   0   21.00    4.50
   5  -5   0   30.80    5.50
  -5   5   0   25.10    4.30
  -5   5   0   35.60    5.80
  -5   5   0   29.20    4.00
  -5   5   0   28.80    4.90
  -5   5   0   26.90    6.20
  -5   5   0   19.80    4.20
  -5   5   0   31.80    4.10
  -5   5   0   23.90    4.90
  -5   5   0   25.90    4.20
   4  -5   0  154.18    8.90
   4  -5   0  129.29    7.70
   4  -5   0  146.89    7.50
   4  -5   0  144.79    9.30
   4  -5   0  137.79    8.80
   4  -5   0  140.39    7.60
   4  -5   0  132.49    8.10
   4  -5   0  152.78    9.30
   4  -5   0  151.68    9.90
  -4   5   0  140.59    8.00
  -4   5   0  137.99    9.30
  -4   5   0  137.09    8.80
  -4   5   0  127.89    8.30
  -4   5   0  135.79    8.10
  -4   5   0  131.19    7.70
  -4   5   0  146.09    8.00
  -4   5   0  138.79    9.30
  -4   5   0  144.89    9.70
   3  -5   0  582.74   24.10
   3  -5   0  603.84   25.30
   3  -5   0  599.64   24.90
   3  -5   0  586.74   22.80
   3  -5   0  579.54   23.20
   3  -5   0  559.14   24.30
   3  -5   0  583.04   23.60
   3  -5   0  600.34   24.60
   3  -5   0  592.14   22.80
  -3   5   0  596.64   22.90
  -3   5   0  548.75   24.60
  -3   5   0  596.54   24.90
  -3   5   0  608.54   25.30
  -3   5   0  568.54   23.80
  -3   5   0  574.64   23.30
  -3   5   0  571.44   24.20
  -3   5   0  568.24   23.90
  -3   5   0  526.05   24.50
   2  -5   0 2127.69   75.59
   2  -5   0 2101.69   77.29
   2  -5   0 2039.30   75.99
   2  -5   0 2118.99   76.39
   2  -5   0 2130.39   74.89
   2  -5   0 2028.50   76.69
   2  -5   0 2008.00   76.69
   2  -5   0 2046.40   75.19
  -2   5   0 2032.60   75.69
  -2   5   0 2037.70   76.99
  -2   5   0 2043.20   76.89
  -2   5   0 2128.59   76.49
  -2   5   0 2153.68   77.49
  -2   5   0 2007.70   74.79
  -2   5   0 1925.81   75.49
  -2   5   0 1998.30   76.99
   1  -5   0  530.45   19.30
   1  -5   0  509.45   21.10
   1  -5   0  520.35   20.50
   1  -5   0  515.05   20.90
   1  -5   0  523.85   22.00
   1  -5   0  520.15   21.40
   1  -5   0  511.15   21.50
   1  -5   0  515.45   22.00
   1  -5   0  524.35   19.50
   1  -5   0  534.95   20.20
  -1   5   0  518.65   20.60
  -1   5   0  523.65   21.30
  -1   5   0  522.75   21.90
  -1   5   0  523.65   21.90
  -1   5   0  513.45   20.60
  -1   5   0  536.35   21.70
  -1   5   0  519.15   21.10
   0  -5   0 4610.84  166.78
   0  -5   0 4653.43  165.38
   0  -5   0 4388.76  168.28
   0  -5   0 4706.13  165.28
   0  -5   0 4799.02  167.18
   0  -5   0 4692.33  166.18
   0  -5   0 4492.95  165.68
   0  -5   0 4438.76  167.38
   0  -5   0 4416.16  166.28
   0  -5   0 4685.13  167.38
   0   5   0 4412.66  167.08
   0   5   0 4605.54  166.58
   0   5   0 4640.14  166.38
   0   5   0 4669.63  166.48
   0   5   0 4707.93  165.88
   0   5   0 4592.04  166.88
   0   5   0 4351.96  165.78
   0   5   0 4819.42  167.28
  -1  -5   0    4.60    1.20
  -1  -5   0    5.90    1.30
  -1  -5   0    4.10    1.40
  -1  -5   0    6.60    0.90
  -1  -5   0    5.50    1.70
  -1  -5   0   11.80    2.10
  -1  -5   0    6.10    1.90
  -1  -5   0    3.80    1.60
  -1  -5   0    5.40    1.50
  -1  -5   0    4.30    1.20
   1   5   0    3.00    1.30
   1   5   0    6.00    1.50
   1   5   0    8.50    1.10
   1   5   0    5.80    1.60
   1   5   0    4.30    1.40
   1   5   0    5.50    1.80
   1   5   0    4.70    1.70
   1   5   0    6.10    1.50
   1   5   0    7.10    1.60
   1   5   0    7.10    2.00
  -2  -5   0 3193.28  121.69
  -2  -5   0 3391.66  119.09
  -2  -5   0 3377.76  122.29
  -2  -5   0 3279.87  120.19
  -2  -5   0 3336.17  119.79
  -2  -5   0 3434.46  121.59
  -2  -5   0 3348.66  119.79
  -2  -5   0 3327.77  120.69
  -2  -5   0 3310.47  120.99
   2   5   0 3153.28  120.79
   2   5   0 3119.09  121.79
   2   5   0 3169.48  119.29
   2   5   0 3166.08  120.29
   2   5   0 3504.05  121.79
   2   5   0 3396.26  119.89
   2   5   0 3384.86  120.99
   2   5   0 3273.37  120.09
   2   5   0 3288.57  121.69
  -3  -5   0   46.60    3.80
  -3  -5   0   43.30    4.20
  -3  -5   0   46.90    4.20
  -3  -5   0   56.99    5.00
  -3  -5   0   39.50    5.20
  -3  -5   0   48.40    3.40
  -3  -5   0   48.50    5.00
  -3  -5   0   49.50    4.70
  -3  -5   0   41.30    3.50
   3   5   0   49.99    4.30
   3   5   0   42.00    3.60
   3   5   0   40.90    4.50
   3   5   0   50.59    5.70
   3   5   0   46.70    4.00
   3   5   0   42.10    4.70
   3   5   0   45.20    5.20
   3   5   0   40.70    4.40
  -4  -5   0  535.75   21.70
  -4  -5   0  544.75   23.10
  -4  -5   0  532.55   22.20
  -4  -5   0  515.05   24.50
  -4  -5   0  533.35   21.50
  -4  -5   0  518.65   23.50
  -4  -5   0  516.25   23.00
  -4  -5   0  540.65   20.80
  -4  -5   0  510.05   22.70
   4   5   0  520.05   24.40
   4   5   0  471.85   22.70
   4   5   0  524.35   22.40
   4   5   0  515.75   23.00
   4   5   0  567.44   22.20
   4   5   0  551.34   25.00
   4   5   0  540.15   21.80
   4   5   0  528.35   23.00
  -5  -5   0   20.70    4.50
  -5  -5   0   12.70    2.50
  -5  -5   0   15.10    3.10
  -5  -5   0    7.90    3.00
  -5  -5   0   15.60    3.10
  -5  -5   0    8.30    2.40
  -5  -5   0   17.30    3.90
  -5  -5   0   11.40    3.00
   5   5   0   17.10    3.90
   5   5   0   11.10    3.30
   5   5   0   11.30    3.40
   5   5   0   11.00    2.80
   5   5   0   12.20    2.80
   5   5   0   20.80    4.10
   5   5   0   12.00    2.80
   5   5   0   10.90    2.50
  -6  -5   0   59.79    6.00
  -6  -5   0   71.79    6.30
  -6  -5   0   66.89    6.40
  -6  -5   0   78.89    8.40
  -6  -5   0   68.89    8.40
  -6  -5   0   71.49    7.30
  -6  -5   0   47.90    5.00
   6   5   0   67.69    6.90
   6   5   0   69.89    6.30
   6   5   0   71.79    6.50
   6   5   0   58.89    5.80
   6   5   0   57.29    7.60
   6   5   0   71.69    8.50
   6   5   0   65.49    7.00
   6   5   0   59.19    6.10
  -7  -5   0  367.36   21.70
  -7  -5   0  331.77   20.40
  -7  -5   0  347.87   15.70
  -7  -5   0  338.67   18.60
  -7  -5   0  349.17   17.40
  -7  -5   0  353.76   17.50
  -7  -5   0  319.27   16.70
  -7  -5   0  373.76   19.10
  -7  -5   0  363.46   17.70
   7   5   0  354.26   21.00
   7   5   0  368.16   17.50
   7   5   0  355.06   17.40
   7   5   0  334.97   20.50
   7   5   0  330.47   17.20
   7   5   0  392.96   19.60
   7   5   0  368.36   18.00
   7   5   0  358.46   18.80
  -8  -5   0  106.59    8.90
  -8  -5   0  114.59    7.50
  -8  -5   0  123.69   12.30
  -8  -5   0  115.69   11.80
  -8  -5   0  104.69    9.20
  -8  -5   0  112.89   10.40
  -8  -5   0  120.59    9.30
  -8  -5   0  110.69    8.60
  -8  -5   0  117.39   10.20
   8   5   0   98.09   11.00
   8   5   0  118.49   10.40
   8   5   0  115.69   10.20
   8   5   0  116.59   12.20
   8   5   0  130.09    9.30
   8   5   0  117.09    8.70
   8   5   0  106.79    9.10
   8   5   0  120.39    9.20
  -9  -5   0  615.94   26.10
  -9  -5   0  574.24   27.60
  -9  -5   0  608.24   33.00
  -9  -5   0  615.54   30.40
  -9  -5   0  638.34   28.90
  -9  -5   0  622.64   33.40
  -9  -5   0  634.54   28.40
  -9  -5   0  629.94   30.40
   9   5   0  634.84   30.10
   9   5   0  615.14   27.70
   9   5   0  609.24   27.90
   9   5   0  604.14   28.60
   9   5   0  626.54   30.40
   9   5   0  598.64   32.80
   9   5   0  649.54   33.10
   9   5   0  608.44   28.30
 -10  -5   0  467.95   26.40
 -10  -5   0  500.65   22.60
 -10  -5   0  481.65   26.90
 -10  -5   0  554.24   30.80
 -10  -5   0  513.25   25.70
 -10  -5   0  485.55   24.40
 -10  -5   0  510.35   25.10
 -10  -5   0  452.15   29.40
  10   5   0  528.25   22.70
  10   5   0  518.15   26.70
  10   5   0  505.05   23.70
  10   5   0  502.45   25.10
  10   5   0  475.25   29.30
  10   5   0  552.84   25.10
  10   5   0  546.05   30.10
 -11  -5   0 1393.66   65.19
 -11  -5   0 1325.77   60.29
 -11  -5   0 1404.46   64.09
 -11  -5   0 1390.76   59.99
 -11  -5   0 1334.87   58.29
 -11  -5   0 1353.96   58.49
 -11  -5   0 1434.66   57.79
  11   5   0 1411.86   60.69
  11   5   0 1388.96   63.39
  11   5   0 1423.36   57.29
  11   5   0 1426.66   59.89
  11   5   0 1463.95   54.79
  11   5   0 1364.26   57.89
  11   5   0 1381.06   55.69
  11   5   0 1404.86   64.39
 -12  -5   0    1.10    5.60
 -12  -5   0    0.70    4.80
 -12  -5   0    2.80    3.00
 -12  -5   0    0.10    3.20
 -12  -5   0   -0.50    2.60
 -12  -5   0   -4.00    3.90
  12   5   0   -0.80    4.20
  12   5   0    3.10    2.60
  12   5   0   -3.50    2.60
  12   5   0    0.60    4.40
  12   5   0   -6.60    4.10
  12   5   0    5.70    6.10
  12   5   0    5.20    5.80
  12   5   0   -2.10    2.20
 -13  -5   0  782.02   38.90
 -13  -5   0  837.02   40.80
 -13  -5   0  810.22   39.90
 -13  -5   0  794.02   37.60
 -13  -5   0  773.42   34.10
  13   5   0  733.83   39.80
  13   5   0  738.03   33.90
  13   5   0  794.32   33.40
  13   5   0  741.83   39.60
  13   5   0  803.82   36.80
  13   5   0  872.41   44.60
 -14  -5   0    6.10    4.60
 -14  -5   0    2.40    6.90
 -14  -5   0    5.70    3.70
 -14  -5   0    5.00    4.70
 -14  -5   0    7.90    5.70
 -14  -5   0    2.00    6.00
  14   5   0    2.90    2.80
  14   5   0    9.90    6.90
  14   5   0    6.00    5.50
  14   5   0    9.90    7.70
  14   5   0   12.60    3.60
  14   5   0   14.00   10.10
 -15  -5   0  152.28   15.30
 -15  -5   0  146.09   11.90
 -15  -5   0  186.28   19.10
 -15  -5   0  152.08   16.50
 -15  -5   0  185.78   22.00
  15   5   0  153.58   27.70
  15   5   0  163.28   17.70
  15   5   0  126.59   10.80
  15   5   0  154.28   19.90
  15   5   0  148.09   10.90
  15   5   0  159.78   14.90
 -16  -5   0   -5.30    3.40
 -16  -5   0   -8.00    3.80
 -16  -5   0   -0.80    7.20
 -16  -5   0   -7.60    7.40
 -16  -5   0    6.00    5.90
  16   5   0    0.90    3.40
  16   5   0    1.10    6.50
  16   5   0    7.40    6.20
  16   5   0   -1.90    4.90
  16   5   0   -0.30    5.00
  15  -6   0  529.25   35.50
  15  -6   0  550.54   28.10
  15  -6   0  555.44   32.20
  15  -6   0  500.75   32.10
 -15   6   0  476.15   32.50
 -15   6   0  552.24   33.60
 -15   6   0  492.55   32.20
 -15   6   0  517.65   26.60
 -15   6   0  484.75   31.40
 -15   6   0  586.64   39.30
  14  -6   0   22.10    7.80
  14  -6   0   13.30    2.90
  14  -6   0    6.70    7.90
  14  -6   0   17.40    5.90
  14  -6   0   17.30    6.40
 -14   6   0   14.60    6.30
 -14   6   0    7.00    6.00
 -14   6   0   12.90    4.50
 -14   6   0   13.60    7.70
 -14   6   0   19.70    6.40
 -14   6   0   14.80    7.10
  13  -6   0  252.87   17.20
  13  -6   0  289.87   21.20
  13  -6   0  249.38   19.60
  13  -6   0  246.58   22.60
 -13   6   0  274.57   23.70
 -13   6   0  268.47   15.80
 -13   6   0  271.47   21.50
 -13   6   0  246.68   18.80
 -13   6   0  270.87   19.00
 -13   6   0  246.58   20.50
 -13   6   0  227.48   15.80
  12  -6   0   15.20    6.20
  12  -6   0   21.50    8.50
  12  -6   0   22.00    7.10
  12  -6   0   27.60    9.30
 -12   6   0   24.60    6.80
 -12   6   0   17.70    4.20
 -12   6   0   18.20    5.80
 -12   6   0   14.80    7.10
 -12   6   0   20.70    7.00
 -12   6   0   26.80    6.10
 -12   6   0   25.70    7.80
 -12   6   0   19.90    6.70
 -12   6   0   24.90    5.20
  11  -6   0   10.50    4.40
  11  -6   0   20.90    5.40
  11  -6   0   16.10    5.70
  11  -6   0   24.10    6.10
  11  -6   0   13.90    7.00
  11  -6   0   13.50    5.10
  11  -6   0   17.40    6.10
 -11   6   0   16.40    5.50
 -11   6   0    7.40    4.80
 -11   6   0   18.80    4.50
 -11   6   0   25.40    6.90
 -11   6   0   28.00    7.00
 -11   6   0   11.70    3.30
 -11   6   0   28.10    8.50
 -11   6   0   19.70    6.30
 -11   6   0   24.70   10.50
  10  -6   0   15.70    5.40
  10  -6   0   18.20    4.40
  10  -6   0    8.00    3.40
  10  -6   0   14.20    4.60
  10  -6   0   19.10    5.50
  10  -6   0   14.70    5.90
  10  -6   0   21.60    5.90
 -10   6   0   20.80    4.40
 -10   6   0   14.00    4.60
 -10   6   0   14.40    4.40
 -10   6   0   16.70    5.70
 -10   6   0   20.90    6.60
 -10   6   0   22.10    5.20
 -10   6   0   18.10    5.60
 -10   6   0   17.50    5.60
 -10   6   0   14.00    4.80
 -10   6   0    4.90    3.00
   9  -6   0    3.30    3.40
   9  -6   0    7.90    3.80
   9  -6   0   12.80    5.40
   9  -6   0    4.90    2.90
   9  -6   0    9.00    3.80
   9  -6   0   10.20    4.40
   9  -6   0   12.80    4.00
   9  -6   0    9.00    3.60
  -9   6   0    6.10    4.40
  -9   6   0   13.00    5.40
  -9   6   0    8.00    4.60
  -9   6   0   11.90    4.30
  -9   6   0    7.30    2.50
  -9   6   0    8.80    4.10
  -9   6   0    8.90    3.00
  -9   6   0   12.70    3.70
  -9   6   0    2.40    3.00
  -9   6   0    7.10    4.00
   8  -6   0  561.04   28.90
   8  -6   0  548.95   25.10
   8  -6   0  552.54   27.20
   8  -6   0  519.05   26.40
   8  -6   0  549.25   28.10
   8  -6   0  509.95   25.50
   8  -6   0  541.15   26.60
   8  -6   0  574.44   24.80
   8  -6   0  557.84   24.40
  -8   6   0  507.65   28.20
  -8   6   0  579.04   29.50
  -8   6   0  550.94   26.50
  -8   6   0  549.35   22.80
  -8   6   0  559.34   25.90
  -8   6   0  526.05   24.90
  -8   6   0  519.85   25.50
  -8   6   0  551.64   27.10
  -8   6   0  557.24   25.00
  -8   6   0  555.94   27.80
   7  -6   0  783.12   33.20
   7  -6   0  750.42   33.80
   7  -6   0  770.32   35.90
   7  -6   0  765.92   35.00
   7  -6   0  785.92   32.30
   7  -6   0  817.12   32.20
   7  -6   0  820.32   34.80
   7  -6   0  765.12   33.90
   7  -6   0  770.02   31.70
  -7   6   0  761.92   32.90
  -7   6   0  709.93   33.30
  -7   6   0  817.92   36.60
  -7   6   0  723.93   32.60
  -7   6   0  774.02   35.00
  -7   6   0  794.12   34.50
  -7   6   0  666.73   34.70
  -7   6   0  792.32   32.60
  -7   6   0  737.73   32.30
   6  -6   0 1860.11   72.79
   6  -6   0 1819.42   68.89
   6  -6   0 1822.22   70.69
   6  -6   0 1764.52   71.49
   6  -6   0 1809.72   68.39
   6  -6   0 1726.83   69.59
   6  -6   0 1737.73   70.49
   6  -6   0 1878.11   71.39
   6  -6   0 1840.92   68.89
  -6   6   0 1856.41   71.69
  -6   6   0 1876.51   71.89
  -6   6   0 1829.62   70.99
  -6   6   0 1915.71   69.59
  -6   6   0 1759.52   72.09
  -6   6   0 1649.93   68.89
  -6   6   0 1911.51   73.19
  -6   6   0 1695.73   70.09
  -6   6   0 1886.11   69.79
   5  -6   0  358.96   17.70
   5  -6   0  327.27   16.60
   5  -6   0  313.07   15.70
   5  -6   0  317.97   15.20
   5  -6   0  311.27   16.50
   5  -6   0  318.07   17.00
   5  -6   0  337.37   18.00
   5  -6   0  342.07   15.20
   5  -6   0  340.37   14.90
  -5   6   0  356.56   17.70
  -5   6   0  352.96   18.40
  -5   6   0  319.57   16.30
  -5   6   0  319.97   15.50
  -5   6   0  325.57   17.50
  -5   6   0  303.67   15.20
  -5   6   0  337.77   15.90
  -5   6   0  321.77   17.40
  -5   6   0  327.57   16.80
   4  -6   0 2897.41  110.49
   4  -6   0 2917.31  109.39
   4  -6   0 3200.18  112.09
   4  -6   0 2984.30  110.19
   4  -6   0 2915.21  108.79
   4  -6   0 2917.91  110.69
   4  -6   0 3088.49  108.59
   4  -6   0 2993.30  113.59
   4  -6   0 3019.80  108.39
  -4   6   0 3009.10  109.79
  -4   6   0 2985.40  108.99
  -4   6   0 3024.60  110.89
  -4   6   0 2882.31  111.09
  -4   6   0 3061.79  111.99
  -4   6   0 2616.24  109.49
  -4   6   0 3043.80  111.29
  -4   6   0 2812.92  108.49
   3  -6   0  110.19    6.90
   3  -6   0  119.49    7.50
   3  -6   0  110.89    8.20
   3  -6   0  114.99    6.80
   3  -6   0  117.79    7.70
   3  -6   0  117.99    6.40
   3  -6   0  114.79    7.70
   3  -6   0  118.29    6.30
  -3   6   0  121.39    7.20
  -3   6   0  131.99    8.80
  -3   6   0  116.09    7.60
  -3   6   0  110.79    8.00
  -3   6   0  109.99    6.20
  -3   6   0  108.69    7.20
  -3   6   0  107.99    6.80
  -3   6   0  118.69    8.00
  -3   6   0  105.59    8.00
   2  -6   0 1036.70   40.60
   2  -6   0  929.91   39.40
   2  -6   0 1075.59   41.10
   2  -6   0 1034.30   40.50
   2  -6   0  967.60   40.80
   2  -6   0 1036.40   39.20
   2  -6   0 1105.59   41.40
   2  -6   0 1068.39   38.80
   2  -6   0 1071.69   38.20
   2  -6   0 1041.70   40.10
  -2   6   0 1053.99   40.90
  -2   6   0 1020.20   40.90
  -2   6   0 1081.99   40.40
  -2   6   0  975.10   39.20
  -2   6   0 1080.79   44.40
  -2   6   0 1031.00   41.20
  -2   6   0 1017.20   39.40
  -2   6   0  922.01   40.60
   1  -6   0  238.28   11.00
   1  -6   0  227.68    9.50
   1  -6   0  235.38   12.40
   1  -6   0  231.28   11.50
   1  -6   0  252.27   12.20
   1  -6   0  241.08   12.20
   1  -6   0  223.78   11.50
   1  -6   0  238.28   10.60
   1  -6   0  241.98   12.00
   1  -6   0  238.48   10.20
  -1   6   0  229.08   11.40
  -1   6   0  226.98   11.20
  -1   6   0  241.68   11.90
  -1   6   0  224.88   10.70
  -1   6   0  247.48   12.00
  -1   6   0  236.58   10.80
  -1   6   0  234.68   12.10
  -1   6   0  213.78   11.70
   0  -6   0  262.57   10.90
   0  -6   0  241.58   12.20
   0  -6   0  236.58   13.00
   0  -6   0  273.57   12.80
   0  -6   0  258.37   12.00
   0  -6   0  257.77   10.90
   0  -6   0  246.38   11.20
   0  -6   0  264.47   11.80
   0  -6   0  250.87   13.10
   0  -6   0  264.17   13.00
   0   6   0  244.28   12.60
   0   6   0  242.48   11.80
   0   6   0  262.77   12.20
   0   6   0  256.17   11.50
   0   6   0  256.57   11.40
   0   6   0  256.07   12.20
   0   6   0  266.07   12.90
   0   6   0  257.07   12.50
  -1  -6   0  104.89    6.30
  -1  -6   0  104.69    7.40
  -1  -6   0  104.49    5.90
  -1  -6   0  107.29    6.20
  -1  -6   0  100.99    5.90
  -1  -6   0  104.19    5.60
  -1  -6   0  104.09    6.50
  -1  -6   0  105.19    6.90
   1   6   0   96.19    6.00
   1   6   0  112.29    6.80
   1   6   0   95.59    7.00
   1   6   0  111.69    7.30
   1   6   0   96.59    5.90
   1   6   0  101.09    6.50
   1   6   0  107.49    6.90
   1   6   0  102.19    6.30
  -2  -6   0   26.50    4.30
  -2  -6   0   32.70    4.50
  -2  -6   0   24.60    2.90
  -2  -6   0   25.70    2.10
  -2  -6   0   22.30    3.30
  -2  -6   0   28.40    3.90
  -2  -6   0   21.40    3.60
  -2  -6   0   30.70    3.30
  -2  -6   0   18.80    2.60
   2   6   0   20.90    3.00
   2   6   0   24.40    3.80
   2   6   0   20.70    3.80
   2   6   0   21.80    3.60
   2   6   0   24.60    3.30
   2   6   0   27.00    2.30
   2   6   0   25.40    3.60
   2   6   0   19.70    3.20
   2   6   0   20.60    4.00
   2   6   0   20.20    4.00
  -3  -6   0 1295.57   47.30
  -3  -6   0 1295.97   48.40
  -3  -6   0 1198.28   48.60
  -3  -6   0 1241.88   50.19
  -3  -6   0 1293.27   49.60
  -3  -6   0 1260.17   47.70
  -3  -6   0 1248.38   46.50
  -3  -6   0 1231.08   49.20
  -3  -6   0 1302.27   47.00
   3   6   0 1236.58   49.40
   3   6   0 1284.57   48.80
   3   6   0 1244.18   50.09
   3   6   0 1212.38   48.00
   3   6   0 1202.28   46.80
   3   6   0 1312.47   47.80
   3   6   0 1151.28   48.40
  -4  -6   0  531.35   24.30
  -4  -6   0  525.15   23.40
  -4  -6   0  552.54   21.50
  -4  -6   0  531.25   22.20
  -4  -6   0  514.35   22.60
  -4  -6   0  580.94   22.00
  -4  -6   0  552.64   24.20
  -4  -6   0  573.74   25.80
  -4  -6   0  540.55   23.90
   4   6   0  519.85   22.10
   4   6   0  519.05   25.10
   4   6   0  556.64   22.80
   4   6   0  541.75   23.10
   4   6   0  558.34   24.30
   4   6   0  551.64   24.10
   4   6   0  478.45   23.30
  -5  -6   0 1625.94   65.99
  -5  -6   0 1672.23   66.29
  -5  -6   0 1610.94   67.69
  -5  -6   0 1677.23   64.99
  -5  -6   0 1696.23   68.49
  -5  -6   0 1732.93   63.19
  -5  -6   0 1751.02   64.59
  -5  -6   0 1740.33   64.39
  -5  -6   0 1733.63   67.29
   5   6   0 1726.23   66.69
   5   6   0 1757.52   68.89
   5   6   0 1798.92   66.69
   5   6   0 1705.43   66.29
   5   6   0 1746.03   64.69
   5   6   0 1657.43   68.19
   5   6   0 1746.33   65.69
   5   6   0 1646.94   65.99
  -6  -6   0  440.56   20.10
  -6  -6   0  445.06   21.30
  -6  -6   0  455.35   21.50
  -6  -6   0  437.46   21.50
  -6  -6   0  435.46   22.20
  -6  -6   0  441.56   19.80
  -6  -6   0  422.46   19.50
  -6  -6   0  427.96   18.10
  -6  -6   0  452.95   23.70
   6   6   0  448.26   20.10
   6   6   0  430.26   21.40
   6   6   0  455.35   20.80
   6   6   0  436.36   20.90
   6   6   0  452.75   21.70
   6   6   0  409.96   19.70
   6   6   0  496.85   24.50
   6   6   0  401.06   22.90
  -7  -6   0 2465.95  103.89
  -7  -6   0 2565.84  100.89
  -7  -6   0 2527.55  102.99
  -7  -6   0 2611.04  103.19
  -7  -6   0 2660.13  101.69
  -7  -6   0 2914.61  111.99
  -7  -6   0 2789.82  101.59
  -7  -6   0 2815.52  102.49
   7   6   0 2667.33  102.29
   7   6   0 2676.23  104.49
   7   6   0 2902.51  104.29
   7   6   0 2691.63  101.59
   7   6   0 2754.92  103.49
   7   6   0 2450.15  105.49
   7   6   0 2972.80  107.19
   7   6   0 2803.12  101.69
  -8  -6   0    6.60    3.00
  -8  -6   0    7.60    3.40
  -8  -6   0    7.60    3.00
  -8  -6   0    6.70    2.90
  -8  -6   0    7.60    3.80
  -8  -6   0    5.60    3.50
  -8  -6   0    6.90    2.30
  -8  -6   0    8.20    4.80
   8   6   0    8.80    4.20
   8   6   0    9.50    3.50
   8   6   0    4.60    2.60
   8   6   0    4.50    2.60
   8   6   0    8.70    4.10
   8   6   0    8.10    3.70
   8   6   0    9.30    4.70
   8   6   0    7.90    3.80
  -9  -6   0  944.41   42.30
  -9  -6   0  892.81   39.60
  -9  -6   0  965.40   40.40
  -9  -6   0  936.71   45.30
  -9  -6   0  933.11   42.30
  -9  -6   0  927.71   40.50
  -9  -6   0  952.40   37.70
   9   6   0 1019.40   42.60
   9   6   0  953.00   45.70
   9   6   0  922.21   40.40
   9   6   0  963.30   40.20
   9   6   0  894.51   40.70
   9   6   0 1026.50   46.00
   9   6   0  946.21   40.00
   9   6   0  987.70   43.10
 -10  -6   0    5.30    3.10
 -10  -6   0    5.10    4.00
 -10  -6   0    5.40    4.90
 -10  -6   0    7.60    4.30
 -10  -6   0    7.10    2.50
 -10  -6   0    4.10    4.00
 -10  -6   0    5.20    3.20
  10   6   0    1.80    3.80
  10   6   0    2.80    2.50
  10   6   0    3.30    3.00
  10   6   0   10.20    5.50
  10   6   0    4.30    3.90
  10   6   0    8.90    5.40
  10   6   0    3.50    2.60
  10   6   0    3.50    3.90
 -11  -6   0  140.79   12.60
 -11  -6   0  121.49   13.30
 -11  -6   0  136.39   13.60
 -11  -6   0  157.18   14.50
 -11  -6   0  142.79    9.60
 -11  -6   0  156.88   12.80
 -11  -6   0  155.18   17.10
  11   6   0  152.78   10.30
  11   6   0  151.38   14.10
  11   6   0  168.38   17.20
  11   6   0  139.59   13.90
  11   6   0  127.99   11.70
  11   6   0  117.79   14.70
  11   6   0  138.49   12.00
  11   6   0  136.39   10.80
 -12  -6   0   57.29   10.30
 -12  -6   0   13.70    5.50
 -12  -6   0   45.50    8.90
 -12  -6   0   33.30    7.50
 -12  -6   0   56.69    8.10
 -12  -6   0   52.39   10.10
 -12  -6   0   43.10   10.40
  12   6   0   42.00    9.20
  12   6   0   32.30    6.40
  12   6   0   26.10    6.80
  12   6   0   41.30   10.00
  12   6   0   28.80    6.50
  12   6   0   39.20    8.90
  12   6   0   24.50    4.60
 -13  -6   0   21.90    4.20
 -13  -6   0   23.30    6.70
 -13  -6   0   12.70    4.90
 -13  -6   0   18.40    6.80
 -13  -6   0   18.70    6.10
  13   6   0   14.50    4.20
  13   6   0   30.20    6.20
  13   6   0   20.60    6.50
  13   6   0   13.40    5.20
  13   6   0   16.70    7.20
  13   6   0   33.00   10.00
 -14  -6   0   54.49   10.90
 -14  -6   0   34.10    7.80
 -14  -6   0   43.30    8.90
 -14  -6   0   36.00    9.40
 -14  -6   0   34.10    6.60
 -14  -6   0   32.70    9.70
  14   6   0   29.80    7.10
  14   6   0   32.10    8.70
  14   6   0   35.00    6.80
  14   6   0   29.80   12.50
  14   6   0   42.70   10.70
  14   6   0   38.20    7.80
 -15  -6   0  150.08   18.10
 -15  -6   0  144.69   14.60
 -15  -6   0  150.48   11.70
 -15  -6   0  183.38   18.30
 -15  -6   0  168.38   21.00
  15   6   0  160.98   11.20
  15   6   0  165.48   20.90
  15   6   0  156.58   17.40
  15   6   0  150.88   18.80
  15   6   0  119.59   11.30
  15   6   0  179.58   20.70
 -16  -6   0  191.38   18.30
 -16  -6   0  253.17   24.90
 -16  -6   0  206.98   19.90
  16   6   0  206.78   17.40
  16   6   0  196.18   13.10
  16   6   0  217.98   23.40
  16   6   0  232.08   21.20
  15  -7   0    3.10    8.30
  15  -7   0   -2.30    5.20
  15  -7   0    5.50    6.30
  15  -7   0   -3.40    1.60
  15  -7   0   -3.40    1.60
  15  -7   0    6.70    5.60
 -15   7   0   -2.10    3.60
 -15   7   0    7.90    7.60
 -15   7   0   -2.40    6.10
 -15   7   0    0.10    6.20
 -15   7   0    7.70    5.90
  14  -7   0   -1.20    5.00
  14  -7   0    2.90    5.40
  14  -7   0    3.40    2.90
  14  -7   0    1.20    5.00
  14  -7   0    1.10    7.50
 -14   7   0   -0.70    4.10
 -14   7   0   -2.90    5.10
 -14   7   0   -4.20    4.80
 -14   7   0    3.70    5.90
 -14   7   0   -2.90    5.40
 -14   7   0    4.10    6.20
 -14   7   0   -2.60    2.70
  13  -7   0  232.28   19.00
  13  -7   0  227.18   16.30
  13  -7   0  228.68   13.40
  13  -7   0  238.68   20.00
  13  -7   0  280.57   23.10
 -13   7   0  240.78   18.80
 -13   7   0  247.68   22.50
 -13   7   0  211.48   19.90
 -13   7   0  216.98   18.00
 -13   7   0  257.87   20.40
 -13   7   0  221.58   14.00
  12  -7   0  235.28   20.90
  12  -7   0  228.28   20.60
  12  -7   0  195.38   16.40
  12  -7   0  196.38   18.00
 -12   7   0  211.68   18.30
 -12   7   0  224.58   16.90
 -12   7   0  201.38   20.30
 -12   7   0  197.98   12.40
 -12   7   0  191.78   19.00
 -12   7   0  198.58   18.30
 -12   7   0  184.18   16.10
  11  -7   0  206.98   14.20
  11  -7   0  214.08   17.30
  11  -7   0  244.48   20.00
  11  -7   0  193.88   16.20
 -11   7   0  199.58   11.90
 -11   7   0  162.58   18.10
 -11   7   0  186.78   15.20
 -11   7   0  181.58   17.20
 -11   7   0  186.68   17.20
 -11   7   0  219.28   14.10
 -11   7   0  216.28   19.50
  10  -7   0 1047.50   47.80
  10  -7   0 1110.59   44.60
  10  -7   0 1053.29   44.20
  10  -7   0 1033.50   47.00
  10  -7   0 1126.49   50.69
  10  -7   0 1065.29   46.40
  10  -7   0 1066.29   47.20
  10  -7   0 1059.59   45.40
 -10   7   0 1111.29   46.80
 -10   7   0 1065.69   49.10
 -10   7   0 1055.39   47.10
 -10   7   0 1053.39   45.40
 -10   7   0 1049.59   44.90
 -10   7   0 1082.49   42.20
 -10   7   0 1060.29   48.20
 -10   7   0 1111.39   46.70
 -10   7   0 1057.19   50.79
 -10   7   0  977.80   49.60
   9  -7   0   14.00    4.80
   9  -7   0   43.90    7.10
   9  -7   0   41.50    8.20
   9  -7   0   16.50    3.80
   9  -7   0   24.50    6.70
   9  -7   0   38.80    6.90
   9  -7   0   25.30    6.30
   9  -7   0   29.60    5.80
  -9   7   0   31.60    6.40
  -9   7   0   14.90    4.50
  -9   7   0   30.50    7.90
  -9   7   0   34.10    7.40
  -9   7   0   48.50    7.60
  -9   7   0   19.70    4.00
  -9   7   0   23.40    6.10
  -9   7   0   38.50    8.90
  -9   7   0   32.00    4.40
  -9   7   0   32.80    6.20
   8  -7   0 1199.78   48.10
   8  -7   0 1301.77   53.59
   8  -7   0 1187.58   47.60
   8  -7   0 1144.49   50.39
   8  -7   0 1199.88   50.49
   8  -7   0 1091.99   51.29
   8  -7   0 1243.88   51.39
   8  -7   0 1222.18   48.60
   8  -7   0 1137.89   49.20
  -8   7   0 1206.88   50.29
  -8   7   0 1227.28   49.40
  -8   7   0 1289.97   51.59
  -8   7   0 1152.18   48.60
  -8   7   0 1200.68   48.80
  -8   7   0 1265.07   49.80
  -8   7   0 1205.58   53.59
  -8   7   0 1223.78   52.19
  -8   7   0 1068.49   51.79
  -8   7   0 1216.88   45.40
   7  -7   0    8.50    4.20
   7  -7   0    8.50    3.20
   7  -7   0    9.70    3.60
   7  -7   0    3.90    2.60
   7  -7   0   14.30    5.20
   7  -7   0    5.40    2.90
   7  -7   0    7.90    3.90
   7  -7   0    4.70    2.90
   7  -7   0    9.00    3.10
  -7   7   0    9.20    3.50
  -7   7   0    8.50    3.30
  -7   7   0    8.20    3.50
  -7   7   0    9.60    3.90
  -7   7   0    7.60    3.90
  -7   7   0    9.60    3.70
  -7   7   0    9.20    3.00
  -7   7   0   10.60    1.70
  -7   7   0    7.50    3.20
  -7   7   0    4.60    3.90
   6  -7   0 1187.28   46.00
   6  -7   0 1242.28   49.00
   6  -7   0 1146.19   46.80
   6  -7   0 1131.49   48.50
   6  -7   0 1214.28   46.00
   6  -7   0 1177.28   47.80
   6  -7   0 1097.09   47.60
   6  -7   0 1194.48   49.99
   6  -7   0 1175.28   45.40
  -6   7   0 1061.29   47.00
  -6   7   0 1093.79   46.40
  -6   7   0 1072.39   48.70
  -6   7   0 1193.18   49.20
  -6   7   0 1182.98   46.40
  -6   7   0 1173.78   46.60
  -6   7   0 1240.58   48.60
  -6   7   0 1164.08   49.99
  -6   7   0 1229.58   47.10
   5  -7   0   92.39    7.30
   5  -7   0   96.69    6.50
   5  -7   0   96.39    9.30
   5  -7   0   88.99    8.90
   5  -7   0   89.39    7.00
   5  -7   0  102.19    8.80
   5  -7   0  102.69    8.30
   5  -7   0   90.39    6.80
   5  -7   0   89.99    8.20
  -5   7   0   95.09    9.20
  -5   7   0   92.99    7.00
  -5   7   0   82.89    8.30
  -5   7   0   86.79    7.10
  -5   7   0  102.49    7.20
  -5   7   0   98.09    7.60
  -5   7   0   96.19    8.30
  -5   7   0   89.89    7.50
  -5   7   0   91.59    8.90
   4  -7   0   36.60    4.00
   4  -7   0   36.10    5.50
   4  -7   0   33.70    4.50
   4  -7   0   38.10    6.20
   4  -7   0   33.80    4.90
   4  -7   0   46.10    5.50
   4  -7   0   39.60    4.10
   4  -7   0   35.40    6.00
   4  -7   0   42.80    5.70
   4  -7   0   44.10    4.70
  -4   7   0   34.00    4.80
  -4   7   0   43.80    4.60
  -4   7   0   33.20    5.60
  -4   7   0   43.10    6.20
  -4   7   0   42.60    6.30
  -4   7   0   46.40    5.80
  -4   7   0   33.00    5.30
  -4   7   0   38.00    4.80
   3  -7   0   55.09    5.70
   3  -7   0   60.09    5.70
   3  -7   0   59.69    5.60
   3  -7   0   59.19    6.50
   3  -7   0   61.99    4.40
   3  -7   0   61.99    6.50
   3  -7   0   54.89    6.10
   3  -7   0   53.69    4.80
   3  -7   0   59.89    4.20
  -3   7   0   50.69    5.30
  -3   7   0   61.69    6.50
  -3   7   0   53.59    5.10
  -3   7   0   52.99    6.20
  -3   7   0   54.69    5.00
  -3   7   0   52.59    5.60
  -3   7   0   58.79    5.90
  -3   7   0   65.09    6.40
   2  -7   0  812.12   30.00
   2  -7   0  802.72   32.90
   2  -7   0  797.62   32.10
   2  -7   0  766.92   31.50
   2  -7   0  774.82   30.50
   2  -7   0  797.92   29.20
   2  -7   0  743.93   31.80
   2  -7   0  803.62   32.70
   2  -7   0  753.02   30.90
   2  -7   0  782.72   32.70
  -2   7   0  726.83   32.70
  -2   7   0  827.22   33.10
  -2   7   0  781.62   30.70
  -2   7   0  733.23   32.10
  -2   7   0  762.32   32.40
  -2   7   0  778.72   30.90
  -2   7   0  757.02   32.40
   1  -7   0  125.09    8.10
   1  -7   0  114.49    8.20
   1  -7   0  111.09    6.90
   1  -7   0  107.89    7.40
   1  -7   0  120.59    8.30
   1  -7   0  120.69    5.60
   1  -7   0  117.69    6.20
   1  -7   0  131.39    8.90
   1  -7   0  121.39    6.70
   1  -7   0  127.09    7.90
  -1   7   0  114.79    6.90
  -1   7   0  111.69    7.40
  -1   7   0  119.59    7.70
  -1   7   0   98.89    7.60
  -1   7   0  125.49    8.10
  -1   7   0  119.69    7.00
  -1   7   0  117.89    8.30
  -1   7   0  119.09    8.10
   0  -7   0  334.47   15.40
   0  -7   0  391.06   19.40
   0  -7   0  353.96   17.00
   0  -7   0  340.27   14.40
   0  -7   0  348.57   15.70
   0  -7   0  349.87   17.30
   0  -7   0  359.66   16.40
   0  -7   0  350.16   14.50
   0  -7   0  353.56   15.00
   0  -7   0  366.26   16.80
   0   7   0  326.67   15.70
   0   7   0  336.67   16.60
   0   7   0  337.87   15.20
   0   7   0  344.27   15.20
   0   7   0  368.96   17.00
   0   7   0  361.16   16.20
   0   7   0  350.46   16.20
   0   7   0  333.27   16.30
  -1  -7   0 2524.65   96.69
  -1  -7   0 2626.14   94.59
  -1  -7   0 2740.63   96.89
  -1  -7   0 2484.85   94.99
  -1  -7   0 2563.14   93.59
  -1  -7   0 2593.74   95.69
  -1  -7   0 2449.25   94.59
  -1  -7   0 2587.94   94.09
  -1  -7   0 2613.64   94.09
   1   7   0 2631.94   96.39
   1   7   0 2428.96   96.09
   1   7   0 2689.73   95.49
   1   7   0 2537.05   94.49
   1   7   0 2521.55   94.89
   1   7   0 2571.14   95.79
   1   7   0 2319.17   96.39
   1   7   0 2682.33   94.49
  -2  -7   0  430.06   18.60
  -2  -7   0  412.06   17.90
  -2  -7   0  423.46   19.40
  -2  -7   0  405.46   17.30
  -2  -7   0  445.16   18.40
  -2  -7   0  442.96   18.00
  -2  -7   0  425.16   18.90
  -2  -7   0  425.06   20.30
  -2  -7   0  433.76   20.40
   2   7   0  438.66   19.60
   2   7   0  432.36   18.40
   2   7   0  400.06   18.70
   2   7   0  372.26   15.90
   2   7   0  419.86   20.00
   2   7   0  457.25   20.20
   2   7   0  430.86   20.20
   2   7   0  442.06   18.20
   2   7   0  378.46   16.20
   2   7   0  427.46   19.50
   2   7   0  430.56   18.20
  -3  -7   0 2329.07   88.29
  -3  -7   0 2322.97   87.19
  -3  -7   0 2467.45   92.09
  -3  -7   0 2343.77   83.69
  -3  -7   0 2344.97   84.69
  -3  -7   0 2194.98   84.99
  -3  -7   0 2291.67   86.39
  -3  -7   0 2359.56   84.59
  -3  -7   0 2250.97   85.89
   3   7   0 2375.36   87.69
   3   7   0 2106.39   86.99
   3   7   0 1981.70   85.79
   3   7   0 2363.56   85.79
   3   7   0 2431.16   85.49
   3   7   0 2277.97   83.99
   3   7   0 2291.37   87.99
  -4  -7   0   13.90    3.10
  -4  -7   0   22.70    5.30
  -4  -7   0   24.00    3.40
  -4  -7   0   21.50    4.10
  -4  -7   0   23.60    4.50
  -4  -7   0   29.60    4.20
  -4  -7   0   22.40    3.30
  -4  -7   0   19.00    4.30
  -4  -7   0   24.70    3.10
   4   7   0   22.00    4.60
   4   7   0   30.50    6.50
   4   7   0   20.20    4.10
   4   7   0   24.70    4.50
   4   7   0   22.00    4.90
   4   7   0   17.20    3.30
   4   7   0   22.50    4.10
   4   7   0   22.80    4.90
  -5  -7   0 1254.17   49.99
  -5  -7   0 1269.17   52.39
  -5  -7   0 1220.58   47.50
  -5  -7   0 1212.28   50.59
  -5  -7   0 1233.08   47.80
  -5  -7   0 1222.58   46.70
  -5  -7   0 1190.18   49.30
  -5  -7   0 1202.78   48.70
  -5  -7   0 1238.28   50.09
   5   7   0 1224.58   50.09
   5   7   0 1238.38   49.10
   5   7   0 1191.68   49.80
   5   7   0 1266.77   50.09
   5   7   0 1236.28   51.99
   5   7   0 1249.38   48.00
   5   7   0 1311.17   52.89
   5   7   0 1302.37   48.70
  -6  -7   0   18.70    5.40
  -6  -7   0   24.20    5.10
  -6  -7   0   37.50    5.50
  -6  -7   0   23.40    5.60
  -6  -7   0   13.60    3.90
  -6  -7   0   20.40    3.10
  -6  -7   0   26.00    5.90
  -6  -7   0   23.00    4.60
   6   7   0   21.30    4.40
   6   7   0   27.20    5.70
   6   7   0   15.20    3.70
   6   7   0   24.20    5.70
   6   7   0   27.20    6.10
   6   7   0   30.60    5.40
   6   7   0   20.10    5.30
   6   7   0   22.20    5.40
  -7  -7   0  115.79   18.80
  -7  -7   0  112.29    8.50
  -7  -7   0  131.49    9.40
  -7  -7   0  122.49    7.10
  -7  -7   0  134.59   10.80
  -7  -7   0  126.69    9.30
  -7  -7   0  115.49    9.90
  -7  -7   0  118.39    9.90
  -7  -7   0  126.99   10.90
   7   7   0  108.69   10.10
   7   7   0  114.79    9.40
   7   7   0  122.09    9.80
   7   7   0  118.09   11.50
   7   7   0  124.69    9.20
   7   7   0  129.29    9.50
   7   7   0  148.09   13.20
   7   7   0  126.49   10.30
  -8  -7   0   18.90    5.00
  -8  -7   0   21.40    3.70
  -8  -7   0   12.00    5.50
  -8  -7   0   20.60    4.70
  -8  -7   0   12.40    3.60
  -8  -7   0   23.70    4.00
  -8  -7   0    8.70    4.00
  -8  -7   0   19.20    4.10
  -8  -7   0   20.00    5.10
  -8  -7   0   13.30    3.80
   8   7   0   14.90    3.80
   8   7   0   18.60    4.60
   8   7   0   18.00    4.70
   8   7   0   19.20    4.90
   8   7   0   17.50    4.40
   8   7   0   12.20    3.30
   8   7   0   15.30    5.10
   8   7   0   25.50    7.40
  -9  -7   0  152.88   11.40
  -9  -7   0  135.39   11.10
  -9  -7   0  154.98   13.00
  -9  -7   0  131.59    8.00
  -9  -7   0  145.99   10.40
  -9  -7   0  143.19   14.50
  -9  -7   0  129.49   11.80
  -9  -7   0  146.49    8.60
  -9  -7   0  143.89   11.30
   9   7   0  141.69   12.60
   9   7   0  142.89   12.60
   9   7   0  115.49   10.30
   9   7   0  130.09   14.40
   9   7   0  135.89   10.70
   9   7   0  124.89   10.70
   9   7   0  132.99   13.80
   9   7   0  158.28   11.50
 -10  -7   0  247.78   15.90
 -10  -7   0  218.38   23.30
 -10  -7   0  233.98   14.90
 -10  -7   0  255.47   12.90
 -10  -7   0  284.27   18.20
 -10  -7   0  234.88   19.60
 -10  -7   0  253.77   16.40
 -10  -7   0  251.97   17.90
  10   7   0  243.28   15.70
  10   7   0  271.57   16.80
  10   7   0  251.37   17.60
  10   7   0  275.17   18.50
  10   7   0  258.67   15.60
  10   7   0  260.97   20.40
  10   7   0  236.58   19.60
  10   7   0  283.77   16.40
 -11  -7   0  566.04   24.10
 -11  -7   0  509.35   29.50
 -11  -7   0  571.14   33.80
 -11  -7   0  611.94   31.50
 -11  -7   0  541.45   27.60
 -11  -7   0  537.35   29.70
 -11  -7   0  565.74   28.30
  11   7   0  605.94   34.20
  11   7   0  565.04   25.50
  11   7   0  553.34   29.70
  11   7   0  539.25   30.20
  11   7   0  562.84   33.40
  11   7   0  549.45   28.10
  11   7   0  530.35   26.60
  11   7   0  560.84   28.10
 -12  -7   0  809.12   36.30
 -12  -7   0  784.02   38.80
 -12  -7   0  715.63   37.00
 -12  -7   0  757.22   37.40
 -12  -7   0  799.32   43.30
 -12  -7   0  731.33   31.70
 -12  -7   0  769.12   38.90
  12   7   0  777.42   36.00
  12   7   0  725.93   38.50
  12   7   0  700.73   34.10
  12   7   0  810.52   33.40
  12   7   0  826.42   48.80
  12   7   0  838.72   43.80
  12   7   0  766.12   42.10
 -13  -7   0  209.88   17.30
 -13  -7   0  225.68   28.30
 -13  -7   0  205.58   18.70
 -13  -7   0  214.98   16.70
 -13  -7   0  241.48   19.00
  13   7   0  200.18   14.40
  13   7   0  241.18   22.10
  13   7   0  229.18   16.70
  13   7   0  222.88   18.90
  13   7   0  219.78   13.50
  13   7   0  218.08   18.60
 -14  -7   0  667.13   36.90
 -14  -7   0  695.03   34.10
 -14  -7   0  717.23   38.20
 -14  -7   0  721.73   42.40
 -14  -7   0  657.93   29.10
  14   7   0  676.33   30.10
  14   7   0  634.34   37.90
  14   7   0  694.53   37.10
  14   7   0  600.24   31.00
  14   7   0  703.73   34.10
  14   7   0  701.63   41.00
 -15  -7   0   20.80    7.20
 -15  -7   0   36.10   12.10
 -15  -7   0    4.30    6.70
 -15  -7   0   13.60    8.20
  15   7   0   15.50    6.90
  15   7   0   22.20   11.20
  15   7   0   13.20    7.20
  15   7   0   15.60    6.50
  15   7   0   17.10    4.30
  15  -8   0  128.59   17.50
  15  -8   0  136.09   14.10
  15  -8   0  141.79   20.70
 -15   8   0  128.79   18.70
 -15   8   0  119.69   15.90
 -15   8   0  133.99   18.50
 -15   8   0  114.79   17.50
 -15   8   0  106.79   10.10
  14  -8   0  403.96   27.10
  14  -8   0  410.56   23.50
  14  -8   0  469.65   32.20
  14  -8   0  449.95   31.30
 -14   8   0  396.36   28.90
 -14   8   0  438.56   39.90
 -14   8   0  393.66   20.30
 -14   8   0  414.76   27.30
 -14   8   0  438.36   28.80
  13  -8   0    5.10    3.10
  13  -8   0    3.30    4.90
  13  -8   0    6.40    5.80
  13  -8   0    7.90    7.30
  13  -8   0    0.80    5.50
 -13   8   0    2.70    5.30
 -13   8   0    8.30    4.60
 -13   8   0    3.10    4.70
 -13   8   0    1.60    2.60
 -13   8   0    0.10    5.50
 -13   8   0    1.70    6.40
  12  -8   0  660.83   29.40
  12  -8   0  662.53   31.70
  12  -8   0  648.54   31.30
  12  -8   0  668.13   35.60
  12  -8   0  671.83   37.80
  12  -8   0  684.13   35.00
 -12   8   0  692.43   39.30
 -12   8   0  670.73   37.30
 -12   8   0  705.83   36.70
 -12   8   0  607.24   36.70
 -12   8   0  634.14   33.90
 -12   8   0  646.74   28.00
  11  -8   0   10.20    4.90
  11  -8   0    5.40    6.50
  11  -8   0   13.50    5.60
  11  -8   0   13.10    3.60
  11  -8   0    7.40    4.90
 -11   8   0   14.20    5.20
 -11   8   0    2.10    2.00
 -11   8   0   10.30    5.90
 -11   8   0   16.60    6.00
 -11   8   0   13.10    6.20
 -11   8   0    7.70    5.20
 -11   8   0   17.10    6.60
 -11   8   0    6.90    2.50
  10  -8   0  305.57   22.30
  10  -8   0  323.07   25.50
  10  -8   0  328.17   24.80
  10  -8   0  301.37   17.70
  10  -8   0  307.87   17.20
  10  -8   0  282.97   18.10
  10  -8   0  292.57   16.30
  10  -8   0  305.57   19.50
 -10   8   0  285.87   18.90
 -10   8   0  323.27   21.00
 -10   8   0  289.77   18.80
 -10   8   0  300.37   13.90
 -10   8   0  253.67   20.30
 -10   8   0  254.57   16.90
 -10   8   0  294.77   17.40
 -10   8   0  332.87   23.10
   9  -8   0    2.00    3.90
   9  -8   0    9.80    4.00
   9  -8   0    8.30    4.10
   9  -8   0   11.00    6.00
   9  -8   0   11.20    4.50
   9  -8   0   14.80    4.40
   9  -8   0    7.40    3.50
   9  -8   0    6.80    3.00
  -9   8   0    7.20    1.90
  -9   8   0   11.80    6.20
  -9   8   0    8.80    3.90
  -9   8   0   10.20    4.90
  -9   8   0    6.30    3.00
  -9   8   0    1.50    4.10
  -9   8   0   11.80    4.00
  -9   8   0   17.60    4.80
  -9   8   0   13.20    5.20
   8  -8   0   52.99   10.20
   8  -8   0   59.59    7.40
   8  -8   0   45.50    6.40
   8  -8   0   51.59    6.80
   8  -8   0   33.30    7.60
   8  -8   0   64.09    7.40
   8  -8   0   59.59    9.50
   8  -8   0   60.99    8.60
  -8   8   0   47.70    8.70
  -8   8   0   33.70    3.50
  -8   8   0   43.90    9.60
  -8   8   0   44.10    6.80
  -8   8   0   46.80    9.60
  -8   8   0   59.79    9.20
  -8   8   0   45.20    7.40
  -8   8   0   52.49    7.10
   7  -8   0    1.90    3.10
   7  -8   0   -0.80    2.20
   7  -8   0    4.80    2.90
   7  -8   0    2.80    2.80
   7  -8   0    3.50    3.40
   7  -8   0   -3.50    2.70
   7  -8   0   -2.50    2.80
   7  -8   0    4.00    4.30
   7  -8   0    4.30    3.00
  -7   8   0    4.50    3.30
  -7   8   0    3.30    3.40
  -7   8   0    4.10    2.70
  -7   8   0   -0.80    3.60
  -7   8   0    4.40    3.00
  -7   8   0    0.70    3.60
  -7   8   0    5.00    4.10
   6  -8   0  414.16   19.30
   6  -8   0  437.66   22.60
   6  -8   0  435.66   20.90
   6  -8   0  444.46   20.00
   6  -8   0  406.66   21.40
   6  -8   0  426.96   23.20
   6  -8   0  442.86   22.20
   6  -8   0  403.46   21.10
   6  -8   0  417.26   20.20
   6  -8   0  421.26   19.60
  -6   8   0  453.05   23.80
  -6   8   0  405.56   21.60
  -6   8   0  425.76   20.60
  -6   8   0  383.86   19.50
  -6   8   0  424.16   22.90
  -6   8   0  408.86   20.50
  -6   8   0  417.96   22.40
  -6   8   0  406.66   20.90
   5  -8   0  342.77   15.50
   5  -8   0  322.37   17.10
   5  -8   0  311.87   14.90
   5  -8   0  322.57   18.40
   5  -8   0  323.67   17.40
   5  -8   0  330.77   17.80
   5  -8   0  345.87   19.20
   5  -8   0  313.77   16.30
   5  -8   0  335.07   17.80
  -5   8   0  357.86   18.70
  -5   8   0  348.97   18.10
  -5   8   0  335.17   16.80
  -5   8   0  320.67   16.70
  -5   8   0  299.57   15.70
  -5   8   0  318.17   16.90
  -5   8   0  327.37   18.80
  -5   8   0  353.06   19.50
   4  -8   0 1309.07   48.20
   4  -8   0 1131.69   46.10
   4  -8   0 1174.38   45.60
   4  -8   0 1194.28   48.90
   4  -8   0 1167.28   44.80
   4  -8   0 1224.88   48.00
   4  -8   0 1184.38   44.80
   4  -8   0 1174.38   48.30
   4  -8   0 1182.68   47.20
   4  -8   0 1176.58   48.40
  -4   8   0 1183.48   48.70
  -4   8   0 1198.38   47.70
  -4   8   0 1134.99   45.80
  -4   8   0 1202.58   48.50
  -4   8   0 1110.49   46.70
  -4   8   0 1197.68   49.30
  -4   8   0 1047.20   46.40
  -4   8   0 1155.98   48.20
  -4   8   0 1173.28   46.40
   3  -8   0 1623.84   57.59
   3  -8   0 1613.74   61.19
   3  -8   0 1480.85   60.39
   3  -8   0 1627.34   61.99
   3  -8   0 1544.25   60.09
   3  -8   0 1613.44   61.59
   3  -8   0 1557.24   58.69
   3  -8   0 1481.75   60.39
   3  -8   0 1473.45   59.19
   3  -8   0 1601.24   57.99
  -3   8   0 1589.94   61.49
  -3   8   0 1628.64   59.59
  -3   8   0 1442.06   58.79
  -3   8   0 1570.84   61.39
  -3   8   0 1636.64   62.19
  -3   8   0 1590.04   60.69
  -3   8   0 1507.35   60.89
  -3   8   0 1362.66   59.49
   2  -8   0  735.33   31.70
   2  -8   0  762.62   28.40
   2  -8   0  755.02   31.60
   2  -8   0  739.83   31.70
   2  -8   0  716.33   29.00
   2  -8   0  693.83   30.10
   2  -8   0  739.43   36.80
   2  -8   0  750.72   30.80
   2  -8   0  738.73   27.30
   2  -8   0  724.93   29.70
  -2   8   0  655.83   29.10
  -2   8   0  727.93   29.60
  -2   8   0  670.53   30.20
  -2   8   0  744.63   31.40
  -2   8   0  745.83   31.50
  -2   8   0  751.62   32.00
  -2   8   0  719.13   30.60
  -2   8   0  739.43   31.40
   1  -8   0 4689.53  169.98
   1  -8   0 4596.84  171.38
   1  -8   0 4655.03  167.18
   1  -8   0 4475.35  169.08
   1  -8   0 4626.84  167.78
   1  -8   0 4739.03  170.98
   1  -8   0 4698.43  168.48
   1  -8   0 4810.42  171.68
   1  -8   0 4652.93  170.28
   1  -8   0 4810.52  171.48
  -1   8   0 4769.82  171.38
  -1   8   0 4512.55  170.58
  -1   8   0 4440.46  168.78
  -1   8   0 4051.19  170.98
  -1   8   0 4739.83  170.18
  -1   8   0 4775.52  169.08
  -1   8   0 4654.53  170.58
  -1   8   0 4857.01  171.28
   0  -8   0    5.00    2.40
   0  -8   0    3.50    1.80
   0  -8   0    4.50    2.70
   0  -8   0    3.60    1.90
   0  -8   0    4.70    1.50
   0  -8   0    6.40    1.70
   0  -8   0    6.50    2.70
   0  -8   0    2.00    2.10
   0  -8   0    3.70    2.20
   0   8   0    5.50    2.30
   0   8   0    5.40    2.30
   0   8   0    5.00    2.20
   0   8   0    8.20    2.60
   0   8   0    4.00    2.20
   0   8   0    8.50    3.10
   0   8   0    7.10    2.70
   0   8   0    9.20    2.80
  -1  -8   0 1592.24   61.69
  -1  -8   0 1688.93   61.19
  -1  -8   0 1630.74   62.99
  -1  -8   0 1584.94   62.69
  -1  -8   0 1682.23   64.99
  -1  -8   0 1618.24   64.59
  -1  -8   0 1620.74   61.69
  -1  -8   0 1633.54   62.39
  -1  -8   0 1652.73   63.59
   1   8   0 1711.53   62.99
   1   8   0 1664.53   64.39
   1   8   0 1618.74   62.29
   1   8   0 1695.33   64.49
   1   8   0 1681.13   63.39
   1   8   0 1629.54   62.19
   1   8   0 1679.03   63.89
  -2  -8   0  387.96   20.00
  -2  -8   0  441.06   17.80
  -2  -8   0  410.76   18.40
  -2  -8   0  412.76   17.60
  -2  -8   0  370.56   23.80
  -2  -8   0  395.56   20.20
  -2  -8   0  401.66   16.90
  -2  -8   0  377.66   18.50
  -2  -8   0  418.26   18.00
   2   8   0  426.76   19.20
   2   8   0  358.86   18.20
   2   8   0  420.16   18.10
   2   8   0  430.86   18.10
   2   8   0  340.17   15.50
   2   8   0  420.46   18.20
   2   8   0  406.26   19.90
   2   8   0  408.46   21.20
   2   8   0  443.86   20.40
  -3  -8   0    5.50    2.70
  -3  -8   0    5.30    2.40
  -3  -8   0   23.00    3.90
  -3  -8   0    9.70    2.10
  -3  -8   0    6.90    2.20
  -3  -8   0    7.00    2.40
  -3  -8   0   12.50    2.50
  -3  -8   0   21.90    4.90
  -3  -8   0   15.40    3.40
   3   8   0   14.80    3.60
   3   8   0   11.40    2.90
   3   8   0    7.00    2.00
   3   8   0    6.00    2.90
   3   8   0    8.60    2.60
   3   8   0    7.60    2.60
   3   8   0   10.30    3.50
   3   8   0    8.90    2.80
   3   8   0    6.40    2.90
   3   8   0   11.30    2.50
  -4  -8   0   57.79    7.50
  -4  -8   0   49.10    5.70
  -4  -8   0   63.29    4.80
  -4  -8   0   59.89    6.20
  -4  -8   0   51.69    5.50
  -4  -8   0   55.39    5.00
  -4  -8   0   52.19    6.30
  -4  -8   0   61.99    6.60
  -4  -8   0   53.79    4.40
  -4  -8   0   55.99    7.10
   4   8   0   47.10    4.60
   4   8   0   53.39    6.50
   4   8   0   57.79    6.10
   4   8   0   70.39    7.80
   4   8   0   48.60    6.60
   4   8   0   56.69    8.00
   4   8   0   63.99    6.20
   4   8   0   54.39    6.10
  -5  -8   0  622.34   27.50
  -5  -8   0  571.54   27.00
  -5  -8   0  638.74   25.20
  -5  -8   0  628.74   25.70
  -5  -8   0  597.04   28.40
  -5  -8   0  623.74   24.70
  -5  -8   0  605.24   27.80
  -5  -8   0  620.64   28.40
  -5  -8   0  604.54   26.30
  -5  -8   0  609.74   30.00
   5   8   0  621.34   28.00
   5   8   0  598.24   28.20
   5   8   0  664.63   31.10
   5   8   0  631.24   27.20
   5   8   0  612.04   25.60
   5   8   0  613.14   29.70
   5   8   0  550.54   27.30
   5   8   0  635.14   26.70
  -6  -8   0  678.03   27.60
  -6  -8   0  674.83   26.30
  -6  -8   0  650.73   30.10
  -6  -8   0  702.63   30.70
  -6  -8   0  672.43   29.80
  -6  -8   0  667.13   28.50
  -6  -8   0  679.53   28.00
  -6  -8   0  665.83   32.60
  -6  -8   0  625.14   30.70
   6   8   0  597.24   31.70
   6   8   0  625.24   29.10
   6   8   0  675.43   30.40
   6   8   0  619.14   27.80
   6   8   0  654.93   30.30
   6   8   0  663.23   30.30
   6   8   0  668.43   28.70
   6   8   0  685.53   33.20
  -7  -8   0  845.52   38.80
  -7  -8   0  867.71   35.30
  -7  -8   0  858.81   37.80
  -7  -8   0  843.22   37.30
  -7  -8   0  831.02   37.20
  -7  -8   0  850.71   35.10
  -7  -8   0  866.81   40.80
  -7  -8   0  826.42   35.60
  -7  -8   0  861.61   33.20
   7   8   0  816.22   37.10
   7   8   0  811.22   35.50
   7   8   0  833.42   35.90
   7   8   0  865.31   52.49
   7   8   0  808.62   37.60
   7   8   0  876.61   37.90
   7   8   0  909.81   41.40
   7   8   0  872.31   36.90
  -8  -8   0 1247.18   52.79
  -8  -8   0 1347.47   57.59
  -8  -8   0 1141.09   54.39
  -8  -8   0 1234.18   53.69
  -8  -8   0 1265.97   50.99
  -8  -8   0 1297.07   51.39
  -8  -8   0 1233.68   53.29
  -8  -8   0 1238.88   48.40
  -8  -8   0 1354.06   54.09
  -8  -8   0 1259.27   51.49
   8   8   0 1198.18   51.39
   8   8   0 1313.57   53.99
   8   8   0 1346.97   57.39
   8   8   0 1340.87   54.59
   8   8   0 1243.78   52.59
   8   8   0 1393.36   58.09
   8   8   0 1282.07   51.89
   8   8   0 1265.07   52.79
  -9  -8   0  301.57   18.80
  -9  -8   0  283.57   17.30
  -9  -8   0  278.67   13.60
  -9  -8   0  251.47   20.00
  -9  -8   0  313.87   16.90
  -9  -8   0  302.67   21.70
  -9  -8   0  268.57   15.70
  -9  -8   0  295.97   19.00
  -9  -8   0  281.87   13.40
  -9  -8   0  288.17   16.80
   9   8   0  302.37   21.80
   9   8   0  271.67   16.90
   9   8   0  325.87   21.40
   9   8   0  280.27   16.80
   9   8   0  283.77   16.70
   9   8   0  318.47   19.30
   9   8   0  288.17   18.90
 -10  -8   0 1023.90   43.50
 -10  -8   0  989.70   43.90
 -10  -8   0  943.31   42.50
 -10  -8   0 1022.70   39.70
 -10  -8   0 1013.50   43.80
 -10  -8   0  996.40   46.50
 -10  -8   0  990.00   45.80
 -10  -8   0 1082.59   50.59
 -10  -8   0 1008.00   39.60
 -10  -8   0  975.30   38.40
 -10  -8   0 1057.29   46.60
  10   8   0 1007.10   44.80
  10   8   0 1035.50   46.00
  10   8   0 1041.80   46.80
  10   8   0  973.80   43.60
  10   8   0  982.20   49.40
  10   8   0 1101.69   44.30
  10   8   0 1069.09   50.99
  10   8   0  996.40   43.70
 -11  -8   0    7.60    4.70
 -11  -8   0   10.70    6.00
 -11  -8   0    9.00    2.50
 -11  -8   0    8.00    4.80
 -11  -8   0    7.40    4.00
 -11  -8   0    5.50    1.90
 -11  -8   0    8.50    5.90
 -11  -8   0    6.50    2.20
  11   8   0   16.60    6.40
  11   8   0    7.10    3.50
  11   8   0    9.80    3.70
  11   8   0    5.40    3.80
  11   8   0   12.70    5.30
  11   8   0    4.70    5.20
  11   8   0    4.20    6.20
 -12  -8   0  634.84   36.70
 -12  -8   0  532.45   23.70
 -12  -8   0  502.65   23.40
 -12  -8   0  551.14   29.20
 -12  -8   0  567.34   28.70
 -12  -8   0  585.74   31.80
 -12  -8   0  528.45   30.90
  12   8   0  525.95   27.30
  12   8   0  601.24   35.40
  12   8   0  615.74   31.80
  12   8   0  593.24   29.30
  12   8   0  567.94   31.80
  12   8   0  566.24   26.20
  12   8   0  559.64   34.80
 -13  -8   0   12.70    6.80
 -13  -8   0    7.90    5.10
 -13  -8   0    2.10    2.20
 -13  -8   0    4.80    4.30
 -13  -8   0    6.00    2.50
 -13  -8   0   -1.00    5.70
  13   8   0    5.30    3.60
  13   8   0    9.60    5.70
  13   8   0    3.70    5.00
  13   8   0   19.00    8.60
  13   8   0    3.10    5.50
 -14  -8   0   32.10    7.80
 -14  -8   0   31.20    8.30
 -14  -8   0   41.20   11.90
 -14  -8   0   19.50    3.50
 -14  -8   0   30.60    7.10
  14   8   0   34.40    9.30
  14   8   0   66.09   15.40
  14   8   0   33.70    9.00
  14   8   0   43.30    7.70
  14   8   0   60.09   11.20
 -15  -8   0   -0.10    4.00
 -15  -8   0    7.20    8.60
 -15  -8   0    4.60    7.20
 -15  -8   0   -5.40    2.00
 -15  -8   0    5.90    6.40
 -15  -8   0    2.10    1.60
 -15  -8   0    1.70    1.80
 -15  -8   0    4.70    5.30
  15   8   0   10.50    7.20
  15   8   0   11.50    7.90
  15   8   0   10.80    6.30
  15   8   0    1.20    3.70
  15   8   0   -3.90    7.10
  14  -9   0   78.29   15.00
  14  -9   0   48.70   11.90
  14  -9   0   59.99   11.10
 -14   9   0   78.89   20.10
 -14   9   0   87.89   16.70
 -14   9   0   71.69   13.20
 -14   9   0   39.50   10.10
 -14   9   0   69.29   13.60
 -14   9   0   64.39    6.60
  13  -9   0   29.20    7.30
  13  -9   0   26.30    6.20
  13  -9   0   19.30    7.30
  13  -9   0   31.80    7.40
  13  -9   0   33.30   11.90
 -13   9   0   31.90    9.00
 -13   9   0   24.20    8.20
 -13   9   0   22.50    5.00
 -13   9   0   24.50    8.70
 -13   9   0   27.00    7.20
 -13   9   0   19.20    7.30
  12  -9   0   54.19    9.00
  12  -9   0   45.20   10.60
  12  -9   0   35.90    9.90
  12  -9   0   38.40    8.50
  12  -9   0   32.10    8.40
  12  -9   0   40.10    8.30
 -12   9   0   43.30    9.80
 -12   9   0   31.60    4.70
 -12   9   0   23.30    7.70
 -12   9   0   57.59   13.70
 -12   9   0   31.30    7.40
 -12   9   0   33.20    8.10
 -12   9   0   36.70    7.70
 -12   9   0   30.70    8.10
  11  -9   0   36.60    8.20
  11  -9   0   57.69    9.20
  11  -9   0   68.09   12.80
  11  -9   0   29.30    7.30
  11  -9   0   46.70   10.10
 -11   9   0   36.80    8.90
 -11   9   0   58.59   12.00
 -11   9   0   32.50    7.50
 -11   9   0   50.99   12.40
 -11   9   0   66.49   13.40
 -11   9   0   40.00    9.00
  10  -9   0  496.15   23.40
  10  -9   0  455.15   24.10
  10  -9   0  494.05   28.00
  10  -9   0  480.45   23.80
  10  -9   0  507.65   24.20
  10  -9   0  488.85   26.70
  10  -9   0  513.15   29.90
 -10   9   0  504.35   30.70
 -10   9   0  425.76   27.90
 -10   9   0  507.35   28.10
 -10   9   0  480.15   29.10
 -10   9   0  449.46   25.70
 -10   9   0  482.75   27.50
   9  -9   0  383.96   23.60
   9  -9   0  382.06   20.20
   9  -9   0  384.56   20.20
   9  -9   0  413.86   25.50
   9  -9   0  410.06   22.90
   9  -9   0  382.96   19.30
   9  -9   0  398.36   21.50
   9  -9   0  377.56   19.80
  -9   9   0  401.16   27.10
  -9   9   0  363.46   24.30
  -9   9   0  425.66   24.00
  -9   9   0  377.16   22.10
  -9   9   0  377.26   20.70
  -9   9   0  395.66   22.20
  -9   9   0  391.96   25.30
  -9   9   0  375.86   20.70
   8  -9   0  327.87   21.40
   8  -9   0  328.27   16.40
   8  -9   0  324.17   17.00
   8  -9   0  311.47   20.30
   8  -9   0  316.17   17.90
   8  -9   0  315.87   17.00
   8  -9   0  336.97   17.90
   8  -9   0  316.37   19.10
  -8   9   0  293.87   20.00
  -8   9   0  329.57   20.00
  -8   9   0  284.27   18.10
  -8   9   0  308.37   17.20
  -8   9   0  314.17   21.10
  -8   9   0  326.97   18.00
  -8   9   0  314.47   21.70
  -8   9   0  324.87   18.70
   7  -9   0 1310.27   51.79
   7  -9   0 1376.86   51.99
   7  -9   0 1246.38   54.89
   7  -9   0 1335.57   69.09
   7  -9   0 1354.36   53.29
   7  -9   0 1333.67   55.59
   7  -9   0 1249.77   52.79
   7  -9   0 1315.07   51.09
   7  -9   0 1273.07   54.19
  -7   9   0 1370.46   57.89
  -7   9   0 1139.99   64.59
  -7   9   0 1419.06   53.99
  -7   9   0 1389.06   57.09
  -7   9   0 1137.09   52.99
  -7   9   0 1243.78   52.19
  -7   9   0 1327.27   53.29
  -7   9   0 1352.96   55.39
   6  -9   0  357.16   18.70
   6  -9   0  356.16   20.30
   6  -9   0  375.66   17.60
   6  -9   0  383.56   20.00
   6  -9   0  388.56   22.20
   6  -9   0  370.56   21.30
   6  -9   0  377.26   20.40
   6  -9   0  384.76   19.90
   6  -9   0  381.96   18.10
  -6   9   0  355.06   20.90
  -6   9   0  394.46   21.00
  -6   9   0  375.36   19.80
  -6   9   0  371.86   22.40
  -6   9   0  349.77   18.20
  -6   9   0  372.96   21.70
  -6   9   0  383.56   19.40
  -6   9   0  384.16   19.40
   5  -9   0 2396.26   90.89
   5  -9   0 2496.55   95.49
   5  -9   0 2479.25   94.59
   5  -9   0 2494.25   93.99
   5  -9   0 2301.17   92.39
   5  -9   0 2376.86   91.69
   5  -9   0 2546.65   94.19
   5  -9   0 2640.54   96.39
   5  -9   0 2432.76   94.59
   5  -9   0 2454.75   91.19
  -5   9   0 2400.46   93.39
  -5   9   0 2382.26   93.39
  -5   9   0 2427.76   93.09
  -5   9   0 2526.45   96.79
  -5   9   0 2269.17   94.69
  -5   9   0 2562.04   96.19
  -5   9   0 2398.16   92.19
  -5   9   0 2586.14   94.89
   4  -9   0   15.40    4.40
   4  -9   0   11.30    2.30
   4  -9   0   14.60    2.70
   4  -9   0   19.00    4.30
   4  -9   0   20.20    4.90
   4  -9   0   13.60    3.10
   4  -9   0   11.10    3.20
   4  -9   0   11.70    3.70
   4  -9   0   10.70    3.60
   4  -9   0    9.90    3.50
  -4   9   0   14.00    4.20
  -4   9   0    9.10    3.30
  -4   9   0   16.40    3.50
  -4   9   0   10.90    3.50
  -4   9   0   15.50    3.60
  -4   9   0   12.40    3.30
  -4   9   0   17.20    4.60
  -4   9   0   10.80    3.50
  -4   9   0   15.30    4.70
   3  -9   0  320.67   17.20
   3  -9   0  313.17   17.30
   3  -9   0  314.27   17.20
   3  -9   0  306.47   15.90
   3  -9   0  308.87   13.00
   3  -9   0  298.87   14.30
   3  -9   0  305.07   14.90
   3  -9   0  291.77   16.00
   3  -9   0  295.47   13.50
   3  -9   0  265.47   15.60
  -3   9   0  323.67   15.30
  -3   9   0  317.47   17.30
  -3   9   0  299.27   16.60
  -3   9   0  317.07   16.40
  -3   9   0  291.97   15.50
  -3   9   0  309.07   16.80
  -3   9   0  276.97   14.50
  -3   9   0  301.77   17.30
   2  -9   0  127.29    8.80
   2  -9   0  121.79    8.00
   2  -9   0  121.59    7.60
   2  -9   0  123.89   10.40
   2  -9   0  115.59    8.60
   2  -9   0  122.79    9.80
   2  -9   0  121.99    6.80
   2  -9   0  115.29    8.80
   2  -9   0  127.79    9.80
  -2   9   0  120.59    8.00
  -2   9   0  125.29    9.80
  -2   9   0  126.69    9.70
  -2   9   0  121.89    9.20
  -2   9   0  125.59   10.10
  -2   9   0  103.99    8.10
  -2   9   0  124.79    9.10
   1  -9   0   74.89    6.80
   1  -9   0   75.49    6.00
   1  -9   0   80.79    5.10
   1  -9   0   70.49    5.60
   1  -9   0   69.79    4.40
   1  -9   0   63.99    7.30
   1  -9   0   66.89    8.00
   1  -9   0   72.79    8.00
   1  -9   0   67.69    7.30
  -1   9   0   73.79    7.40
  -1   9   0   77.39    7.40
  -1   9   0   66.49    6.80
  -1   9   0   61.29    5.70
  -1   9   0   69.69    6.20
  -1   9   0   73.69    7.60
  -1   9   0   68.79    6.90
   0  -9   0  104.39    7.70
   0  -9   0  103.89    6.80
   0  -9   0   95.39    7.80
   0  -9   0   95.19    9.30
   0  -9   0  115.49    9.20
   0  -9   0  111.79    6.20
   0  -9   0  107.59    7.30
   0  -9   0  111.79    8.90
   0  -9   0   93.39    6.20
   0   9   0  108.09    7.50
   0   9   0  113.99    8.40
   0   9   0  110.39    8.40
   0   9   0  107.09    7.30
   0   9   0  108.69    8.80
   0   9   0  110.19    9.10
   0   9   0   97.19    8.20
   0   9   0   98.59    8.90
  -1  -9   0  832.52   32.70
  -1  -9   0  813.92   35.40
  -1  -9   0  825.32   32.10
  -1  -9   0  860.51   36.20
  -1  -9   0  833.82   33.60
  -1  -9   0  798.62   34.50
  -1  -9   0  837.82   32.70
  -1  -9   0  824.02   33.60
  -1  -9   0  807.72   36.20
   1   9   0  802.32   34.90
   1   9   0  853.71   33.50
   1   9   0  789.72   33.30
   1   9   0  884.81   34.80
   1   9   0  845.82   35.80
   1   9   0  828.22   34.10
   1   9   0  841.62   35.60
   1   9   0  784.42   35.80
  -2  -9   0  646.24   29.80
  -2  -9   0  668.43   28.00
  -2  -9   0  634.44   26.40
  -2  -9   0  688.43   27.10
  -2  -9   0  663.53   26.80
  -2  -9   0  656.93   29.80
  -2  -9   0  651.13   27.40
  -2  -9   0  627.54   25.70
  -2  -9   0  619.24   28.30
   2   9   0  562.74   27.40
   2   9   0  620.54   28.40
   2   9   0  570.84   24.30
   2   9   0  677.13   29.60
   2   9   0  628.44   27.10
   2   9   0  729.53   33.20
   2   9   0  673.33   29.60
   2   9   0  652.83   27.20
   2   9   0  688.33   28.50
  -3  -9   0  719.03   32.20
  -3  -9   0  693.83   29.80
  -3  -9   0  701.13   28.80
  -3  -9   0  690.63   30.90
  -3  -9   0  714.73   30.60
  -3  -9   0  729.03   32.60
  -3  -9   0  695.43   28.10
  -3  -9   0  707.13   28.50
  -3  -9   0  743.33   29.80
   3   9   0  769.52   29.70
   3   9   0  624.94   30.40
   3   9   0  746.23   31.90
   3   9   0  715.53   32.00
   3   9   0  627.74   26.70
   3   9   0  736.03   30.90
   3   9   0  612.04   29.80
   3   9   0  701.13   29.70
   3   9   0  758.82   29.10
  -4  -9   0 2154.18   80.79
  -4  -9   0 2025.50   82.29
  -4  -9   0 2124.79   79.99
  -4  -9   0 2108.19   84.89
  -4  -9   0 2231.98   83.69
  -4  -9   0 2162.18   81.99
  -4  -9   0 2187.08   81.99
  -4  -9   0 2127.89   83.89
  -4  -9   0 2135.19   79.79
   4   9   0 2195.68   82.69
   4   9   0 2007.60   82.69
   4   9   0 2186.78   81.89
   4   9   0 2302.17   86.09
   4   9   0 2003.80   83.99
   4   9   0 2211.78   81.49
   4   9   0 2040.90   79.19
   4   9   0 2196.48   82.89
   4   9   0 2231.88   84.29
  -5  -9   0  496.45   21.30
  -5  -9   0  542.15   25.70
  -5  -9   0  503.65   24.60
  -5  -9   0  515.75   23.00
  -5  -9   0  517.15   25.60
  -5  -9   0  495.15   22.20
  -5  -9   0  548.95   21.80
  -5  -9   0  514.65   24.30
  -5  -9   0  512.55   26.90
  -5  -9   0  514.85   24.10
   5   9   0  531.35   22.20
   5   9   0  552.54   27.90
   5   9   0  497.85   24.70
   5   9   0  501.45   24.60
   5   9   0  513.15   26.50
   5   9   0  497.05   23.80
   5   9   0  515.55   25.60
   5   9   0  517.55   23.50
  -6  -9   0 1866.11   69.79
  -6  -9   0 1912.81   75.29
  -6  -9   0 1899.31   72.09
  -6  -9   0 1878.61   70.79
  -6  -9   0 1881.81   73.59
  -6  -9   0 1915.61   73.89
  -6  -9   0 1835.42   73.99
  -6  -9   0 1901.61   74.79
  -6  -9   0 1896.11   77.19
  -6  -9   0 1870.41   71.29
   6   9   0 1836.92   74.49
   6   9   0 1805.62   76.49
   6   9   0 1881.41   74.39
   6   9   0 1803.32   74.09
   6   9   0 1920.41   73.39
   6   9   0 1796.42   71.19
   6   9   0 1870.41   72.49
   6   9   0 1968.10   78.09
  -7  -9   0    2.20    3.00
  -7  -9   0    3.60    3.20
  -7  -9   0    4.30    3.30
  -7  -9   0    4.60    3.80
  -7  -9   0    5.80    1.90
  -7  -9   0    0.90    2.80
  -7  -9   0    1.70    2.40
  -7  -9   0    3.40    4.00
  -7  -9   0    4.10    3.50
  -7  -9   0    6.00    2.70
   7   9   0    0.10    3.50
   7   9   0    0.90    2.10
   7   9   0    4.20    3.50
   7   9   0    3.00    3.70
   7   9   0    6.40    4.10
   7   9   0    9.70    4.00
   7   9   0    3.70    3.60
   7   9   0    6.20    3.10
  -8  -9   0  463.05   27.10
  -8  -9   0  449.16   23.90
  -8  -9   0  445.56   21.20
  -8  -9   0  476.75   24.40
  -8  -9   0  444.76   21.30
  -8  -9   0  464.85   23.90
  -8  -9   0  420.26   18.50
  -8  -9   0  448.26   21.80
  -8  -9   0  398.96   23.10
   8   9   0  437.26   24.00
   8   9   0  437.66   21.70
   8   9   0  421.16   23.70
   8   9   0  471.15   26.90
   8   9   0  454.75   27.20
   8   9   0  463.15   22.50
   8   9   0  412.96   22.70
   8   9   0  399.86   22.80
  -9  -9   0   66.69    8.10
  -9  -9   0   47.40    9.50
  -9  -9   0   58.19    7.10
  -9  -9   0   57.49    8.80
  -9  -9   0   44.90    9.30
  -9  -9   0   51.49    4.90
  -9  -9   0   69.19    8.60
  -9  -9   0   53.09    8.60
  -9  -9   0   57.19    5.20
  -9  -9   0   61.69   12.00
   9   9   0   66.89   10.70
   9   9   0   64.39    8.90
   9   9   0   65.49   12.10
   9   9   0   58.09   10.00
   9   9   0   54.39    8.10
   9   9   0   65.79    7.80
   9   9   0   59.59    9.60
   9   9   0   45.70    8.40
 -10  -9   0    2.80    3.80
 -10  -9   0    3.10    3.10
 -10  -9   0    7.50    4.40
 -10  -9   0   10.60    3.80
 -10  -9   0    6.30    2.20
 -10  -9   0   -1.40    3.30
 -10  -9   0    2.10    5.20
 -10  -9   0    4.60    4.50
 -10  -9   0    1.30    3.30
 -10  -9   0    3.50    1.90
  10   9   0    4.10    4.10
  10   9   0    4.00    6.30
  10   9   0   -4.10    3.70
  10   9   0   -0.40    3.00
  10   9   0    5.00    3.50
  10   9   0    5.90    4.60
 -11  -9   0   61.89    9.60
 -11  -9   0   77.79   11.60
 -11  -9   0   64.79    5.40
 -11  -9   0   56.59   13.70
 -11  -9   0   67.49   11.40
 -11  -9   0   55.89    9.20
 -11  -9   0   67.69    5.40
  11   9   0   86.49   12.00
  11   9   0   73.19   14.80
  11   9   0   66.89    9.20
  11   9   0   66.89   11.00
  11   9   0   64.79    9.80
  11   9   0   78.69   14.40
 -12  -9   0  392.86   17.40
 -12  -9   0  429.26   30.30
 -12  -9   0  385.76   17.40
 -12  -9   0  454.65   23.80
 -12  -9   0  437.56   26.50
 -12  -9   0  401.26   26.20
  12   9   0  367.16   25.30
  12   9   0  421.76   29.00
  12   9   0  455.85   30.50
  12   9   0  405.16   23.30
  12   9   0  407.76   21.20
  12   9   0  418.96   25.80
 -13  -9   0  274.17   20.80
 -13  -9   0  242.78   23.70
 -13  -9   0  241.08   17.70
 -13  -9   0  232.58   19.80
 -13  -9   0  222.28   11.30
  13   9   0  239.48   17.70
  13   9   0  233.78   20.20
  13   9   0  238.88   19.30
  13   9   0  233.18   15.00
  13   9   0  271.87   22.90
 -14  -9   0  428.66   32.40
 -14  -9   0  423.26   28.10
 -14  -9   0  396.46   23.80
  14   9   0  373.86   27.80
  14   9   0  416.26   27.10
  14   9   0  379.96   20.80
  14   9   0  512.35   43.80
  14   9   0  397.36   29.00
 -15  -9   0  497.35   28.60
 -15  -9   0  518.85   32.60
 -15  -9   0  485.25   35.50
  15   9   0  502.35   28.40
  15   9   0  485.25   34.90
  15   9   0  480.75   24.10
  14 -10   0  110.79   16.50
  14 -10   0  130.19   20.20
  14 -10   0  137.59   13.50
 -14  10   0  139.59   18.90
 -14  10   0  114.19   18.70
 -14  10   0  122.89   16.60
 -14  10   0  106.09   15.60
  13 -10   0  176.98   13.30
  13 -10   0  213.28   15.50
  13 -10   0  198.78   25.50
  13 -10   0  198.28   19.60
 -13  10   0  220.88   20.10
 -13  10   0  189.48   20.60
 -13  10   0  182.28   28.00
 -13  10   0  166.28   17.40
 -13  10   0  174.58   16.20
  12 -10   0  180.98   13.20
  12 -10   0  168.18   17.20
  12 -10   0  171.58   19.60
  12 -10   0  170.58   15.70
  12 -10   0  157.48   13.40
  12 -10   0  153.98   12.70
 -12  10   0  151.88   16.80
 -12  10   0  192.28   20.10
 -12  10   0  140.69   17.20
 -12  10   0  140.09   16.70
 -12  10   0  140.79   14.70
 -12  10   0  176.48   15.60
  11 -10   0  773.72   34.40
  11 -10   0  785.02   39.40
  11 -10   0  720.93   37.70
  11 -10   0  782.32   34.60
  11 -10   0  766.62   41.50
  11 -10   0  752.82   37.90
 -11  10   0  623.44   43.10
 -11  10   0  785.72   43.00
 -11  10   0  833.22   42.10
 -11  10   0  835.92   40.60
 -11  10   0  726.93   37.40
 -11  10   0  801.02   38.00
  10 -10   0   31.30    7.10
  10 -10   0   26.00    7.50
  10 -10   0   49.30   11.90
  10 -10   0   39.50    7.20
  10 -10   0   41.00    8.50
  10 -10   0   24.10    5.30
  10 -10   0   39.30    8.20
 -10  10   0   20.40    6.80
 -10  10   0   31.60    7.40
 -10  10   0   34.70    7.10
 -10  10   0   37.60    9.00
 -10  10   0   38.00    9.40
 -10  10   0   36.90    8.30
   9 -10   0  359.56   18.70
   9 -10   0  340.07   20.90
   9 -10   0  350.46   19.40
   9 -10   0  334.27   18.70
   9 -10   0  332.27   22.10
   9 -10   0  340.17   17.80
   9 -10   0  332.07   23.20
  -9  10   0  369.66   21.30
  -9  10   0  348.37   24.70
  -9  10   0  316.27   20.30
  -9  10   0  357.26   23.90
  -9  10   0  355.46   19.80
  -9  10   0  375.66   22.50
  -9  10   0  325.07   22.50
   8 -10   0    2.90    3.40
   8 -10   0    4.80    3.50
   8 -10   0   -3.60    3.30
   8 -10   0    2.50    4.50
   8 -10   0    2.60    4.40
   8 -10   0    4.80    3.30
   8 -10   0    3.90    3.20
   8 -10   0    2.00    2.90
  -8  10   0    2.50    4.40
  -8  10   0   -4.20    3.50
  -8  10   0    7.10    4.20
  -8  10   0    3.10    3.40
  -8  10   0   -2.00    2.40
  -8  10   0   -2.00    4.20
  -8  10   0    1.30    3.80
  -8  10   0    7.60    5.70
   7 -10   0  109.09    8.90
   7 -10   0  107.79   12.00
   7 -10   0   95.29   12.10
   7 -10   0  112.39   10.50
   7 -10   0  122.79    9.00
   7 -10   0  110.99    8.40
   7 -10   0   99.29   10.30
  -7  10   0   88.89   11.00
  -7  10   0  100.99   12.60
  -7  10   0  112.89    9.90
  -7  10   0   89.29    9.60
  -7  10   0   98.29    9.00
  -7  10   0  122.39   13.50
  -7  10   0  109.09   11.90
  -7  10   0  113.89   10.60
   6 -10   0    8.00    3.40
   6 -10   0    2.60    3.00
   6 -10   0    3.20    3.80
   6 -10   0    5.70    3.70
   6 -10   0    5.10    2.80
   6 -10   0   10.10    4.70
   6 -10   0    7.10    2.50
   6 -10   0    8.40    3.50
   6 -10   0   10.00    5.10
  -6  10   0   12.30    4.80
  -6  10   0    8.20    3.60
  -6  10   0   11.30    5.40
  -6  10   0    7.30    4.50
  -6  10   0    7.80    3.50
  -6  10   0    8.30    4.20
  -6  10   0   14.30    5.00
  -6  10   0    5.70    3.20
   5 -10   0  208.78   13.50
   5 -10   0  196.48   10.70
   5 -10   0  173.18   14.10
   5 -10   0  209.38   15.30
   5 -10   0  183.08   12.00
   5 -10   0  181.38   12.90
   5 -10   0  197.48   11.40
   5 -10   0  177.38   13.70
   5 -10   0  182.48   13.50
   5 -10   0  196.78   10.50
  -5  10   0  206.28   13.10
  -5  10   0  179.68   11.60
  -5  10   0  184.78   14.80
  -5  10   0  208.58   14.10
  -5  10   0  193.78   15.30
  -5  10   0  178.48   13.70
  -5  10   0  190.98   12.70
  -5  10   0  216.88   13.00
   4 -10   0  246.68   14.60
   4 -10   0  221.58   12.70
   4 -10   0  243.18   16.10
   4 -10   0  286.57   16.30
   4 -10   0  235.78   14.50
   4 -10   0  236.58   11.90
   4 -10   0  245.38   16.10
   4 -10   0  255.27   15.10
   4 -10   0  249.38   13.40
   4 -10   0  247.58   11.60
  -4  10   0  252.97   15.30
  -4  10   0  254.47   15.60
  -4  10   0  262.47   16.60
  -4  10   0  228.88   16.00
  -4  10   0  223.28   14.10
  -4  10   0  253.17   14.20
  -4  10   0  256.07   14.70
  -4  10   0  244.28   15.30
  -4  10   0  228.78   13.20
   3 -10   0  742.63   33.60
   3 -10   0  737.33   30.10
   3 -10   0  771.32   32.20
   3 -10   0  759.72   28.20
   3 -10   0  756.02   33.90
   3 -10   0  736.23   29.20
   3 -10   0  706.83   30.80
   3 -10   0  742.63   33.60
   3 -10   0  693.63   32.10
   3 -10   0  768.12   32.70
  -3  10   0  757.42   32.80
  -3  10   0  731.83   31.30
  -3  10   0  680.83   30.50
  -3  10   0  722.43   33.10
  -3  10   0  740.43   33.30
  -3  10   0  780.92   34.50
  -3  10   0  765.72   34.00
  -3  10   0  706.93   31.60
   2 -10   0  739.23   32.20
   2 -10   0  809.92   35.30
   2 -10   0  815.92   33.90
   2 -10   0  781.82   30.60
   2 -10   0  756.12   33.50
   2 -10   0  827.32   35.50
   2 -10   0  785.62   31.50
   2 -10   0  824.82   35.10
  -2  10   0  794.12   34.70
  -2  10   0  772.52   32.60
  -2  10   0  775.52   34.60
  -2  10   0  789.62   33.30
  -2  10   0  776.52   33.90
  -2  10   0  764.82   34.20
  -2  10   0  821.42   35.60
  -2  10   0  720.33   32.00
   1 -10   0 1043.40   43.40
   1 -10   0 1087.59   40.80
   1 -10   0 1082.79   45.60
   1 -10   0 1035.60   43.70
   1 -10   0 1158.38   45.40
   1 -10   0 1017.50   41.40
   1 -10   0 1018.10   42.30
   1 -10   0 1136.79   45.70
   1 -10   0 1085.89   40.30
  -1  10   0 1061.19   45.30
  -1  10   0 1034.90   42.40
  -1  10   0 1088.29   44.10
  -1  10   0 1033.80   44.30
  -1  10   0 1105.49   44.60
  -1  10   0 1069.49   44.90
  -1  10   0 1096.69   42.80
   0 -10   0 2665.13   99.69
   0 -10   0 2506.15   98.49
   0 -10   0 2540.05   97.19
   0 -10   0 2667.93   95.69
   0 -10   0 2516.35  100.29
   0 -10   0 2650.03  100.29
   0 -10   0 2608.74  100.09
   0 -10   0 2566.94   96.09
   0  10   0 2592.84   97.29
   0  10   0 2632.24   98.69
   0  10   0 2609.44   98.69
   0  10   0 2581.74   99.59
   0  10   0 2709.83   97.49
   0  10   0 2693.33  100.39
   0  10   0 2528.65   99.09
  -1 -10   0  159.28    9.40
  -1 -10   0  155.38   10.10
  -1 -10   0  181.48   11.30
  -1 -10   0  174.68    9.50
  -1 -10   0  174.78   10.30
  -1 -10   0  187.98   12.80
  -1 -10   0  174.78    8.90
  -1 -10   0  170.98   12.80
   1  10   0  167.78   12.30
   1  10   0  154.98   15.40
   1  10   0  177.68   11.50
   1  10   0  172.58   10.50
   1  10   0  170.58   11.90
   1  10   0  175.98   10.40
   1  10   0  156.78   11.00
   1  10   0  159.58   11.50
  -2 -10   0 2762.12  101.79
  -2 -10   0 2820.32  106.29
  -2 -10   0 2650.93  104.09
  -2 -10   0 2789.52  102.49
  -2 -10   0 2775.42  101.09
  -2 -10   0 2779.92  103.89
  -2 -10   0 2751.72  105.99
  -2 -10   0 2615.54  102.79
  -2 -10   0 2867.31  102.49
   2  10   0 2699.33  105.39
   2  10   0 2628.74   99.79
   2  10   0 2833.72  102.89
   2  10   0 2660.53  104.49
   2  10   0 2921.91  103.29
   2  10   0 2912.21  104.59
   2  10   0 2605.24  103.59
   2  10   0 2577.94  102.69
   2  10   0 2895.21  105.89
  -3 -10   0    3.70    2.60
  -3 -10   0    5.10    2.10
  -3 -10   0    4.70    3.50
  -3 -10   0    6.00    2.60
  -3 -10   0    5.00    2.50
  -3 -10   0    3.20    2.60
  -3 -10   0    2.30    1.80
  -3 -10   0    3.00    2.60
  -3 -10   0    3.10    2.70
   3  10   0    2.80    3.10
   3  10   0    5.20    3.70
   3  10   0    4.20    2.90
   3  10   0    1.60    2.10
   3  10   0    2.80    2.60
   3  10   0    1.80    2.90
   3  10   0    6.60    3.00
   3  10   0    4.70    1.20
   3  10   0    4.40    2.40
  -4 -10   0  122.79    9.90
  -4 -10   0  105.29    9.40
  -4 -10   0  132.59   12.20
  -4 -10   0  102.79    9.10
  -4 -10   0  113.79   10.90
  -4 -10   0  141.19    9.70
  -4 -10   0  118.29    7.60
  -4 -10   0  120.29    7.80
  -4 -10   0  126.89   11.60
   4  10   0  124.89    9.30
   4  10   0  117.99   10.10
   4  10   0  104.89    6.50
   4  10   0  106.49    9.50
   4  10   0  117.89   10.20
   4  10   0  126.39    9.10
   4  10   0  127.99   12.10
   4  10   0  110.49   10.50
  -5 -10   0   65.09    8.10
  -5 -10   0   73.69    8.50
  -5 -10   0   74.59    7.30
  -5 -10   0   78.39    6.00
  -5 -10   0   79.79    7.80
  -5 -10   0   69.29    6.30
  -5 -10   0   74.59   10.00
  -5 -10   0   83.79    8.70
  -5 -10   0   75.49   10.00
   5  10   0   78.39    9.10
   5  10   0   87.89    7.90
   5  10   0   84.59   11.00
   5  10   0   68.59    5.90
   5  10   0   66.09    8.60
   5  10   0   75.79    8.60
   5  10   0   70.99    7.90
   5  10   0   85.29    9.70
   5  10   0   75.39    8.60
  -6 -10   0  461.75   20.90
  -6 -10   0  443.46   25.50
  -6 -10   0  419.96   22.70
  -6 -10   0  415.86   23.20
  -6 -10   0  460.65   24.10
  -6 -10   0  427.96   18.70
  -6 -10   0  405.16   21.70
  -6 -10   0  436.66   22.50
  -6 -10   0  449.95   20.20
   6  10   0  448.46   20.00
   6  10   0  446.56   23.40
   6  10   0  432.56   23.60
   6  10   0  447.86   21.80
   6  10   0  427.86   24.70
   6  10   0  446.76   22.10
   6  10   0  475.25   26.80
   6  10   0  411.56   22.50
  -7 -10   0   12.90    4.50
  -7 -10   0    9.80    3.90
  -7 -10   0    8.70    4.40
  -7 -10   0   13.20    5.50
  -7 -10   0    6.40    5.40
  -7 -10   0    9.20    5.20
  -7 -10   0   11.20    3.90
  -7 -10   0    8.10    2.10
  -7 -10   0    5.30    2.90
   7  10   0    9.00    4.30
   7  10   0   11.40    4.70
   7  10   0    9.00    4.40
   7  10   0   11.80    5.80
   7  10   0    9.30    3.60
   7  10   0    8.50    3.10
   7  10   0   10.00    3.70
   7  10   0    7.70    3.90
  -8 -10   0  831.32   38.30
  -8 -10   0  806.12   34.80
  -8 -10   0  881.51   38.20
  -8 -10   0  822.52   38.30
  -8 -10   0  824.02   41.60
  -8 -10   0  799.62   35.40
  -8 -10   0  788.02   37.70
  -8 -10   0  795.62   32.20
   8  10   0  804.42   36.20
   8  10   0  873.41   38.90
   8  10   0  877.71   42.60
   8  10   0  841.12   38.30
   8  10   0  817.92   37.20
   8  10   0  828.82   41.40
   8  10   0  813.62   35.50
   8  10   0  788.42   38.10
  -9 -10   0  613.74   25.10
  -9 -10   0  630.54   35.30
  -9 -10   0  622.74   25.40
  -9 -10   0  657.53   37.50
  -9 -10   0  624.44   32.00
  -9 -10   0  643.14   31.50
  -9 -10   0  602.04   31.50
  -9 -10   0  636.84   29.30
  -9 -10   0  617.04   28.40
   9  10   0  595.34   29.10
   9  10   0  657.83   35.60
   9  10   0  661.13   31.10
   9  10   0  684.03   32.90
   9  10   0  579.24   30.90
   9  10   0  678.03   30.70
   9  10   0  670.63   36.80
   9  10   0  605.64   32.00
 -10 -10   0  369.66   22.70
 -10 -10   0  339.37   14.90
 -10 -10   0  337.87   14.80
 -10 -10   0  311.47   18.30
 -10 -10   0  373.06   21.50
 -10 -10   0  354.36   19.60
 -10 -10   0  367.76   25.80
 -10 -10   0  353.26   22.50
  10  10   0  318.77   24.00
  10  10   0  344.07   20.50
  10  10   0  351.96   25.30
  10  10   0  350.36   19.70
  10  10   0  351.26   22.50
  10  10   0  331.87   22.00
 -11 -10   0  861.61   42.30
 -11 -10   0  874.41   46.60
 -11 -10   0  862.31   39.40
 -11 -10   0  840.22   42.30
 -11 -10   0  846.32   32.90
 -11 -10   0  852.61   32.90
  11  10   0  895.21   46.70
  11  10   0  903.31   42.50
  11  10   0  869.91   39.60
  11  10   0  843.92   42.50
  11  10   0  909.01   40.10
  11  10   0  827.32   47.70
 -12 -10   0    4.30    6.50
 -12 -10   0   11.20    5.30
 -12 -10   0    6.40    6.20
 -12 -10   0    8.50    5.50
  12  10   0    6.10    5.70
  12  10   0    8.60    5.60
  12  10   0    9.60    7.80
  12  10   0    6.80    4.20
  12  10   0   13.40    5.90
  12  10   0    9.30    7.50
 -13 -10   0  409.56   31.20
 -13 -10   0  418.46   27.40
 -13 -10   0  427.36   24.00
 -13 -10   0  347.97   25.80
  13  10   0  397.16   23.90
  13  10   0  388.46   21.20
  13  10   0  413.36   26.70
  13  10   0  370.76   25.70
  13  10   0  394.16   29.90
 -14 -10   0   -1.90    7.90
 -14 -10   0   -5.10    5.00
 -14 -10   0   -6.00    4.50
  14  10   0    0.90    3.60
  14  10   0    6.90    5.80
  14  10   0   10.30    7.40
  14  10   0   -3.90    6.00
  14  10   0    0.20    5.90
  13 -11   0  132.69   18.00
  13 -11   0  114.39   11.80
  13 -11   0  123.59   13.00
  13 -11   0  103.89   15.90
 -13  11   0  139.19   19.90
 -13  11   0  107.19   18.30
 -13  11   0  142.29   17.90
 -13  11   0  143.89   19.60
  12 -11   0   20.80    5.90
  12 -11   0   17.90    6.30
  12 -11   0   12.60    6.00
  12 -11   0   27.40    8.80
  12 -11   0   38.30    9.30
 -12  11   0   27.10    8.80
 -12  11   0   24.40    8.30
 -12  11   0   25.40    6.40
 -12  11   0   21.30    7.50
 -12  11   0    9.40    7.10
 -12  11   0   30.80   10.50
  11 -11   0   30.20    6.30
  11 -11   0   20.00    6.30
  11 -11   0   30.20    8.30
  11 -11   0   17.20    4.80
  11 -11   0   22.40    8.60
  11 -11   0   18.30    4.90
 -11  11   0   13.40    6.70
 -11  11   0    9.50    6.30
 -11  11   0   18.20    8.00
 -11  11   0   27.20    7.70
 -11  11   0   27.50    6.50
 -11  11   0   21.40    7.10
  10 -11   0    5.80    4.40
  10 -11   0    1.10    4.70
  10 -11   0    0.10    2.60
  10 -11   0    2.50    4.40
  10 -11   0   13.30    4.40
  10 -11   0   15.60    8.00
  10 -11   0    2.00    3.70
 -10  11   0    8.30    4.90
 -10  11   0   10.10    5.90
 -10  11   0    9.30    6.20
 -10  11   0    3.40    6.30
 -10  11   0    3.90    4.90
 -10  11   0    7.70    6.00
   9 -11   0  166.88   12.40
   9 -11   0  162.68   12.30
   9 -11   0  160.98   13.80
   9 -11   0  173.68   14.70
   9 -11   0  183.58   16.80
   9 -11   0  183.88   17.70
   9 -11   0  170.78   11.60
  -9  11   0  182.88   13.70
  -9  11   0  165.48   17.30
  -9  11   0  172.78   18.10
  -9  11   0  143.09   15.10
  -9  11   0  177.48   14.50
  -9  11   0  171.98   14.30
  -9  11   0  202.18   16.40
   8 -11   0  409.66   25.70
   8 -11   0  390.96   21.90
   8 -11   0  400.86   24.70
   8 -11   0  409.66   22.70
   8 -11   0  402.26   19.40
   8 -11   0  407.86   20.30
   8 -11   0  377.46   19.90
  -8  11   0  390.26   25.60
  -8  11   0  399.36   26.20
  -8  11   0  443.46   24.80
  -8  11   0  423.56   23.20
  -8  11   0  444.36   23.40
  -8  11   0  364.36   24.00
  -8  11   0  383.26   21.20
   7 -11   0  381.66   20.80
   7 -11   0  317.47   21.80
   7 -11   0  355.06   17.80
   7 -11   0  380.26   17.60
   7 -11   0  350.16   20.70
   7 -11   0  373.16   23.60
   7 -11   0  379.16   18.40
  -7  11   0  334.37   20.20
  -7  11   0  371.36   20.80
  -7  11   0  326.57   20.20
  -7  11   0  368.86   22.30
  -7  11   0  362.16   22.20
  -7  11   0  368.16   23.60
  -7  11   0  362.06   23.90
   6 -11   0  622.54   32.10
   6 -11   0  638.24   27.20
   6 -11   0  661.03   30.30
   6 -11   0  600.94   29.40
   6 -11   0  643.84   26.30
   6 -11   0  606.74   26.30
   6 -11   0  635.54   31.70
  -6  11   0  586.04   27.90
  -6  11   0  622.24   30.50
  -6  11   0  628.44   29.50
  -6  11   0  552.54   28.80
  -6  11   0  643.74   32.60
  -6  11   0  620.44   30.80
  -6  11   0  567.14   31.30
  -6  11   0  669.23   33.40
   5 -11   0  878.81   40.30
   5 -11   0  856.01   39.80
   5 -11   0  845.62   38.60
   5 -11   0  924.71   39.10
   5 -11   0  874.51   34.40
   5 -11   0  822.72   37.60
   5 -11   0  836.82   34.10
   5 -11   0  881.91   38.50
   5 -11   0  867.41   35.30
  -5  11   0  871.91   37.80
  -5  11   0  821.52   39.10
  -5  11   0  903.11   38.10
  -5  11   0  786.22   35.90
  -5  11   0  904.81   37.60
  -5  11   0  861.71   39.00
  -5  11   0  818.72   38.90
  -5  11   0  875.71   40.90
  -5  11   0  861.41   40.30
   4 -11   0 1599.34   59.29
   4 -11   0 1547.65   63.19
   4 -11   0 1641.44   64.99
   4 -11   0 1534.55   62.59
   4 -11   0 1602.04   64.09
   4 -11   0 1578.44   63.49
   4 -11   0 1555.74   58.39
   4 -11   0 1675.83   65.39
  -4  11   0 1566.74   63.69
  -4  11   0 1506.75   62.59
  -4  11   0 1578.44   65.19
  -4  11   0 1650.33   62.39
  -4  11   0 1572.34   65.59
  -4  11   0 1534.85   62.39
  -4  11   0 1494.95   61.09
  -4  11   0 1587.34   64.19
  -4  11   0 1444.96   63.59
   3 -11   0   11.00    4.10
   3 -11   0   18.90    4.40
   3 -11   0   14.50    2.90
   3 -11   0   19.70    5.50
   3 -11   0   17.80    4.80
   3 -11   0   13.10    5.00
   3 -11   0   17.70    3.50
   3 -11   0   21.60    4.90
   3 -11   0   14.60    3.40
  -3  11   0   14.40    3.70
  -3  11   0   19.10    4.70
  -3  11   0   19.10    5.50
  -3  11   0   18.70    4.80
  -3  11   0   18.80    4.90
  -3  11   0   21.10    4.90
  -3  11   0   17.70    4.10
  -3  11   0   15.60    4.30
   2 -11   0  882.11   38.50
   2 -11   0  974.10   40.70
   2 -11   0  904.91   35.10
   2 -11   0  897.51   35.90
   2 -11   0  878.41   37.10
   2 -11   0  950.80   40.60
   2 -11   0  914.81   38.70
   2 -11   0  956.80   40.40
  -2  11   0  860.01   39.20
  -2  11   0  862.81   37.90
  -2  11   0  938.71   40.20
  -2  11   0  927.91   37.80
  -2  11   0  865.31   39.40
  -2  11   0  939.51   39.30
  -2  11   0  923.01   40.70
  -2  11   0  846.42   36.90
   1 -11   0   29.90    5.80
   1 -11   0   26.70    4.40
   1 -11   0   23.90    5.00
   1 -11   0   17.50    4.50
   1 -11   0   22.90    3.40
   1 -11   0   17.40    4.60
   1 -11   0   34.10    3.80
   1 -11   0   22.70    5.10
   1 -11   0   35.50    5.70
  -1  11   0   18.10    4.60
  -1  11   0   22.30    4.30
  -1  11   0   19.40    4.30
  -1  11   0   15.20    3.50
  -1  11   0   27.70    5.80
  -1  11   0   25.90    5.70
  -1  11   0   18.30    4.30
  -1  11   0   19.80    5.00
   0 -11   0   10.50    2.40
   0 -11   0    5.20    2.60
   0 -11   0    7.40    2.80
   0 -11   0    6.80    2.00
   0 -11   0    7.00    2.60
   0 -11   0    9.80    3.60
   0 -11   0    9.70    4.20
   0 -11   0    6.10    3.40
   0  11   0   11.40    4.10
   0  11   0   13.00    3.50
   0  11   0   14.20    4.00
   0  11   0   10.70    3.30
   0  11   0    7.70    3.40
   0  11   0    6.00    3.50
   0  11   0    9.40    4.30
   0  11   0    7.80    3.20
  -1 -11   0   22.50    4.90
  -1 -11   0   35.10    5.50
  -1 -11   0   32.50    6.40
  -1 -11   0   30.50    5.80
  -1 -11   0   30.10    5.20
  -1 -11   0   23.90    4.80
  -1 -11   0   30.70    4.10
  -1 -11   0   33.30    4.90
   1  11   0   29.90    6.00
   1  11   0   28.60    5.20
   1  11   0   24.30    5.50
   1  11   0   35.50    6.10
   1  11   0   35.20    6.30
   1  11   0   24.50    4.80
   1  11   0   35.80    6.60
   1  11   0   32.90    7.50
  -2 -11   0  575.04   24.40
  -2 -11   0  563.84   26.90
  -2 -11   0  575.74   25.30
  -2 -11   0  606.44   28.90
  -2 -11   0  581.44   25.00
  -2 -11   0  572.24   28.10
  -2 -11   0  554.64   28.70
  -2 -11   0  567.74   25.60
  -2 -11   0  611.14   23.80
   2  11   0  605.14   27.40
   2  11   0  581.24   27.40
   2  11   0  603.14   26.40
   2  11   0  527.05   25.30
   2  11   0  532.55   22.40
   2  11   0  557.64   26.30
   2  11   0  581.94   27.90
   2  11   0  576.84   25.70
   2  11   0  604.14   28.50
  -3 -11   0  248.28   11.70
  -3 -11   0  220.08   14.00
  -3 -11   0  216.58   14.20
  -3 -11   0  210.48   12.90
  -3 -11   0  219.28   15.80
  -3 -11   0  223.78   12.10
  -3 -11   0  205.58   12.70
  -3 -11   0  235.88   12.30
  -3 -11   0  226.58   16.20
   3  11   0  229.18   14.60
   3  11   0  240.78   12.90
   3  11   0  215.18   14.80
   3  11   0  215.78   13.00
   3  11   0  216.58   13.70
   3  11   0  225.18   14.80
   3  11   0  247.08   15.80
   3  11   0  245.28   13.50
  -4 -11   0  477.75   21.40
  -4 -11   0  484.65   25.70
  -4 -11   0  471.05   22.70
  -4 -11   0  461.25   20.80
  -4 -11   0  468.25   20.50
  -4 -11   0  484.75   22.80
  -4 -11   0  481.95   24.20
  -4 -11   0  473.65   23.50
  -4 -11   0  473.65   25.90
   4  11   0  454.25   23.30
   4  11   0  478.55   22.80
   4  11   0  438.06   18.80
   4  11   0  488.55   25.50
   4  11   0  499.95   26.90
   4  11   0  490.05   24.10
   4  11   0  491.95   22.60
   4  11   0  463.65   24.10
  -5 -11   0  765.92   31.20
  -5 -11   0  734.93   34.50
  -5 -11   0  762.52   32.20
  -5 -11   0  780.82   36.50
  -5 -11   0  776.82   35.40
  -5 -11   0  799.82   34.20
  -5 -11   0  752.52   37.30
   5  11   0  764.12   38.20
   5  11   0  773.12   35.20
   5  11   0  731.63   36.50
   5  11   0  782.72   30.70
   5  11   0  804.22   33.70
   5  11   0  789.32   35.50
   5  11   0  740.63   33.70
   5  11   0  754.42   34.60
  -6 -11   0  183.78   13.20
  -6 -11   0  153.28    8.90
  -6 -11   0  159.68   10.60
  -6 -11   0  173.88   14.00
  -6 -11   0  160.58   15.00
  -6 -11   0  146.99    9.80
  -6 -11   0  164.58   12.60
   6  11   0  163.38   15.90
   6  11   0  168.88   12.10
   6  11   0  176.08   16.70
   6  11   0  151.18   12.60
   6  11   0  160.18   11.90
   6  11   0  181.58   13.70
   6  11   0  162.38   13.30
   6  11   0  146.09    9.40
  -7 -11   0 1342.57   57.49
  -7 -11   0 1402.96   57.39
  -7 -11   0 1393.86   54.79
  -7 -11   0 1329.07   51.89
  -7 -11   0 1416.46   57.79
  -7 -11   0 1349.27   53.89
  -7 -11   0 1323.07   58.19
  -7 -11   0 1344.07   60.99
   7  11   0 1443.76   62.39
   7  11   0 1374.56   58.19
   7  11   0 1318.37   61.79
   7  11   0 1464.45   56.29
   7  11   0 1349.66   60.49
   7  11   0 1319.87   57.49
  -8 -11   0  157.38   10.40
  -8 -11   0  140.99   13.30
  -8 -11   0  171.48   16.60
  -8 -11   0  153.58   13.70
  -8 -11   0  138.19   11.00
  -8 -11   0  152.18   13.60
  -8 -11   0  138.39   13.40
  -8 -11   0  130.49   12.80
  -8 -11   0  129.19    7.80
   8  11   0  142.39   13.50
   8  11   0  129.99   11.90
   8  11   0  157.68   12.50
   8  11   0  137.29   24.40
   8  11   0  144.29   10.50
   8  11   0  140.39   12.70
   8  11   0  123.49   13.80
  -9 -11   0  381.46   22.40
  -9 -11   0  341.47   15.00
  -9 -11   0  352.56   21.90
  -9 -11   0  376.96   25.60
  -9 -11   0  361.26   19.40
  -9 -11   0  365.26   18.60
  -9 -11   0  339.37   15.30
  -9 -11   0  365.86   22.50
   9  11   0  397.16   26.60
   9  11   0  347.47   21.80
   9  11   0  334.67   19.00
   9  11   0  353.66   22.90
   9  11   0  353.26   24.50
   9  11   0  342.17   22.10
 -10 -11   0    2.20    3.50
 -10 -11   0    1.80    1.30
 -10 -11   0    3.30    4.80
 -10 -11   0    6.30    4.70
 -10 -11   0    0.70    4.10
 -10 -11   0    1.80    2.60
 -10 -11   0   -0.20    5.40
  10  11   0   -0.90    4.00
  10  11   0   -5.00    2.60
  10  11   0   -3.30    3.90
  10  11   0   15.60    7.30
  10  11   0    0.90    3.40
  10  11   0   -5.30    4.60
  10  11   0    5.20    4.80
 -11 -11   0   52.09    9.90
 -11 -11   0   40.70   10.20
 -11 -11   0   70.79   11.60
 -11 -11   0   64.79   12.00
  11  11   0   67.59   14.70
  11  11   0   33.40    7.80
  11  11   0   55.89   12.30
  11  11   0   60.39    9.70
  11  11   0   67.39   11.00
  11  11   0   35.90    6.70
 -12 -11   0   37.40   14.20
 -12 -11   0   61.69   13.50
 -12 -11   0   35.70    8.10
 -12 -11   0   52.99    9.90
  12  11   0   52.79   10.80
  12  11   0   38.00    8.90
  12  11   0   59.59   11.90
  12  11   0   75.99   15.10
 -13 -11   0  107.39   18.70
 -13 -11   0   59.49   14.30
 -13 -11   0   95.39   12.50
  13  11   0   95.59   14.60
  13  11   0   68.99   16.90
  13  11   0  104.89   10.70
  13  11   0   98.19   13.10
  13  11   0   85.79   13.90
 -14 -11   0   44.60   12.90
 -14 -11   0   26.90    7.30
 -14 -11   0   28.00    7.10
  14  11   0   39.40   12.20
  14  11   0   46.70    9.40
  14  11   0   39.60    9.00
  14  11   0   31.70    7.70
  12 -12   0   37.90    6.90
  12 -12   0   27.60   12.60
  12 -12   0   77.19   16.90
  12 -12   0   62.19   10.10
  12 -12   0   54.29   10.20
 -12  12   0   62.89   14.40
 -12  12   0   38.20    9.40
 -12  12   0   71.49   13.00
 -12  12   0   53.19    9.30
  11 -12   0  216.28   21.40
  11 -12   0  157.18   15.30
  11 -12   0  231.58   15.20
  11 -12   0  199.88   19.20
  11 -12   0  206.98   15.80
 -11  12   0  213.48   19.40
 -11  12   0  225.28   22.30
 -11  12   0  211.28   20.10
 -11  12   0  243.68   19.50
 -11  12   0  248.48   22.40
 -11  12   0  220.68   17.90
  10 -12   0  491.25   23.80
  10 -12   0  486.25   29.50
  10 -12   0  445.66   22.60
  10 -12   0  451.35   25.00
  10 -12   0  507.05   31.30
  10 -12   0  458.45   26.70
 -10  12   0  485.75   27.50
 -10  12   0  490.05   29.20
 -10  12   0  510.55   31.70
 -10  12   0  456.55   30.80
 -10  12   0  436.76   26.20
 -10  12   0  416.26   28.50
   9 -12   0  125.49   12.90
   9 -12   0  105.49   13.00
   9 -12   0  120.29   14.80
   9 -12   0  115.39   10.60
   9 -12   0  119.79   15.00
   9 -12   0  121.19   10.20
   9 -12   0  133.29   11.10
  -9  12   0  130.69   16.50
  -9  12   0  107.49   11.70
  -9  12   0  148.79   15.50
  -9  12   0  142.69   16.60
  -9  12   0  126.59   13.50
  -9  12   0  110.29   13.60
   8 -12   0  714.03   38.00
   8 -12   0  695.43   35.00
   8 -12   0  705.43   30.70
   8 -12   0  697.83   36.70
   8 -12   0  720.53   31.50
   8 -12   0  729.53   31.60
   8 -12   0  773.52   34.80
  -8  12   0  735.23   39.20
  -8  12   0  626.24   35.90
  -8  12   0  772.12   37.50
  -8  12   0  784.72   39.50
  -8  12   0  720.13   34.80
   7 -12   0    8.60    4.30
   7 -12   0    4.30    5.20
   7 -12   0   16.00    3.30
   7 -12   0    2.90    2.30
   7 -12   0    4.60    4.70
   7 -12   0   12.80    3.90
   7 -12   0   12.40    4.80
  -7  12   0    9.30    4.10
  -7  12   0   10.40    4.40
  -7  12   0    9.70    6.60
  -7  12   0    0.10    3.70
  -7  12   0    8.80    5.20
  -7  12   0    2.60    3.60
  -7  12   0    7.90    5.10
  -7  12   0    8.80    5.20
   6 -12   0  419.36   19.00
   6 -12   0  436.96   22.90
   6 -12   0  421.16   28.80
   6 -12   0  362.66   24.30
   6 -12   0  453.85   23.70
   6 -12   0  414.56   19.90
   6 -12   0  410.56   24.80
   6 -12   0  426.86   19.10
  -6  12   0  461.95   26.30
  -6  12   0  442.56   26.20
  -6  12   0  384.46   22.20
  -6  12   0  420.56   25.90
  -6  12   0  372.16   23.30
  -6  12   0  434.36   23.00
  -6  12   0  403.56   24.80
   5 -12   0   10.40    4.90
   5 -12   0    7.50    2.30
   5 -12   0    7.80    4.30
   5 -12   0    8.10    2.70
   5 -12   0    9.00    4.00
   5 -12   0    8.20    4.40
   5 -12   0    9.20    3.50
  -5  12   0    6.30    4.40
  -5  12   0    9.20    4.50
  -5  12   0    9.20    5.00
  -5  12   0    6.90    3.60
  -5  12   0    5.00    5.00
  -5  12   0    3.20    3.50
  -5  12   0    5.80    3.30
   4 -12   0   13.00    3.60
   4 -12   0    6.80    3.70
   4 -12   0   13.40    5.20
   4 -12   0   15.60    4.80
   4 -12   0   12.20    4.50
   4 -12   0    9.70    4.20
   4 -12   0   10.40    4.30
   4 -12   0    8.10    1.90
   4 -12   0    9.40    2.80
  -4  12   0    4.60    4.40
  -4  12   0   15.30    5.80
  -4  12   0   11.90    4.40
  -4  12   0    3.50    3.10
  -4  12   0   13.90    3.70
  -4  12   0    6.80    3.80
  -4  12   0   15.20    4.80
  -4  12   0   12.50    4.10
  -4  12   0   16.00    4.80
   3 -12   0   29.70    5.10
   3 -12   0   18.40    5.00
   3 -12   0   17.60    4.70
   3 -12   0   29.60    6.80
   3 -12   0   32.50    4.30
   3 -12   0   23.70    5.30
   3 -12   0   20.70    4.70
  -3  12   0   19.30    5.00
  -3  12   0   18.90    5.20
  -3  12   0   32.00    7.60
  -3  12   0   36.30    8.20
  -3  12   0   18.90    4.60
  -3  12   0   16.50    4.80
  -3  12   0   27.80    5.50
  -3  12   0   26.50    5.10
   2 -12   0  290.37   16.90
   2 -12   0  294.37   14.40
   2 -12   0  308.27   19.20
   2 -12   0  302.57   13.50
   2 -12   0  282.97   18.60
   2 -12   0  294.47   18.80
   2 -12   0  309.27   17.10
  -2  12   0  310.67   16.70
  -2  12   0  306.67   17.90
  -2  12   0  284.67   16.50
  -2  12   0  289.37   17.90
  -2  12   0  291.97   15.50
  -2  12   0  299.57   19.00
  -2  12   0  291.27   18.40
  -2  12   0  314.27   18.20
   1 -12   0  144.19    7.80
   1 -12   0  141.09    9.10
   1 -12   0  169.28   13.30
   1 -12   0  165.18   11.30
   1 -12   0  164.88   13.00
   1 -12   0  150.38   11.30
   1 -12   0  164.48    8.40
   1 -12   0  142.59    9.90
   1 -12   0  156.38   13.60
  -1  12   0  164.28   12.60
  -1  12   0  150.88   10.80
  -1  12   0  154.68   10.30
  -1  12   0  142.99   12.80
  -1  12   0  152.18   12.00
  -1  12   0  156.48   11.50
  -1  12   0  164.48   12.30
  -1  12   0  150.78   11.90
   0 -12   0  820.92   31.90
   0 -12   0  816.42   34.70
   0 -12   0  827.32   37.90
   0 -12   0  786.32   31.40
   0 -12   0  801.42   35.30
   0 -12   0  848.02   37.60
   0 -12   0  813.02   32.30
   0 -12   0  740.23   33.50
   0  12   0  758.52   33.80
   0  12   0  817.02   37.40
   0  12   0  846.12   36.10
   0  12   0  797.92   36.40
   0  12   0  785.32   34.10
   0  12   0  768.32   35.10
   0  12   0  829.42   35.90
   0  12   0  821.62   36.30
  -1 -12   0  632.94   26.10
  -1 -12   0  633.94   29.10
  -1 -12   0  634.74   28.00
  -1 -12   0  663.93   31.30
  -1 -12   0  642.74   31.60
  -1 -12   0  645.64   26.50
  -1 -12   0  620.54   27.60
   1  12   0  589.44   29.80
   1  12   0  586.24   28.40
   1  12   0  623.44   25.60
   1  12   0  645.44   29.90
   1  12   0  654.43   29.10
   1  12   0  596.14   27.60
   1  12   0  627.34   29.40
   1  12   0  598.54   27.80
   1  12   0  658.63   31.10
  -2 -12   0  508.05   21.40
  -2 -12   0  529.75   27.60
  -2 -12   0  508.35   25.10
  -2 -12   0  521.45   22.30
  -2 -12   0  555.14   27.60
  -2 -12   0  522.55   23.10
  -2 -12   0  495.25   23.30
   2  12   0  512.95   24.30
   2  12   0  519.65   26.50
   2  12   0  454.05   20.30
   2  12   0  544.35   25.70
   2  12   0  535.35   24.30
   2  12   0  515.85   24.00
   2  12   0  516.45   25.90
   2  12   0  516.25   25.00
   2  12   0  546.55   27.30
  -3 -12   0  623.24   26.10
  -3 -12   0  651.63   30.10
  -3 -12   0  655.13   32.30
  -3 -12   0  625.54   32.00
  -3 -12   0  677.33   28.40
  -3 -12   0  638.04   29.70
   3  12   0  650.33   29.70
   3  12   0  618.54   28.60
   3  12   0  651.73   31.60
   3  12   0  638.04   30.50
   3  12   0  647.14   28.70
   3  12   0  662.23   30.30
   3  12   0  566.84   30.50
   3  12   0  636.74   28.20
  -4 -12   0   32.60    5.20
  -4 -12   0   49.60    7.00
  -4 -12   0   48.90    6.00
  -4 -12   0   36.90    7.30
  -4 -12   0   43.70    9.40
  -4 -12   0   54.59    9.40
  -4 -12   0   34.80    4.70
  -4 -12   0   52.09    7.30
   4  12   0   47.40    8.00
   4  12   0   39.70    7.60
   4  12   0   33.70    6.90
   4  12   0   41.10    6.70
   4  12   0   42.60    7.90
   4  12   0   40.00    7.20
  -5 -12   0  444.36   22.30
  -5 -12   0  441.76   24.90
  -5 -12   0  426.76   22.90
  -5 -12   0  417.36   21.10
  -5 -12   0  424.06   19.40
  -5 -12   0  430.16   25.30
  -5 -12   0  420.46   20.20
   5  12   0  470.35   22.40
   5  12   0  476.75   27.00
   5  12   0  441.56   29.80
   5  12   0  431.96   22.00
   5  12   0  459.85   23.90
   5  12   0  427.36   22.80
   5  12   0  430.56   24.70
   5  12   0  382.06   17.80
  -6 -12   0   -0.20    1.80
  -6 -12   0    2.60    2.40
  -6 -12   0    2.30    3.10
  -6 -12   0    4.70    3.10
  -6 -12   0    0.70    3.70
  -6 -12   0    1.10    4.80
  -6 -12   0    0.10    3.70
   6  12   0    0.40    3.70
   6  12   0   -0.30    3.40
   6  12   0   -1.90    3.70
   6  12   0    3.10    4.10
   6  12   0    3.10    4.90
   6  12   0    3.70    2.00
  -7 -12   0   69.49   12.00
  -7 -12   0   49.70    8.90
  -7 -12   0   68.19   10.60
  -7 -12   0   68.19   10.00
  -7 -12   0   62.99    6.60
  -7 -12   0   62.19    5.40
  -7 -12   0   77.09   10.30
  -7 -12   0   66.89    8.10
   7  12   0   64.89   10.10
   7  12   0   65.09    6.60
   7  12   0   54.79   10.40
   7  12   0   66.29   16.20
   7  12   0   82.19   10.50
   7  12   0   80.69    9.70
   7  12   0   64.69    9.50
  -8 -12   0    3.80    5.50
  -8 -12   0   -0.10    4.20
  -8 -12   0   -0.70    1.60
  -8 -12   0   -2.70    3.20
  -8 -12   0    4.70    3.20
  -8 -12   0    4.70    3.70
  -8 -12   0    3.60    3.90
   8  12   0   -0.60    2.10
   8  12   0    0.30    5.50
   8  12   0   -3.10    2.40
   8  12   0    0.40    4.70
   8  12   0   -4.30    4.70
   8  12   0    4.80    4.30
  -9 -12   0  107.69    9.90
  -9 -12   0  103.79   12.70
  -9 -12   0  100.19   12.60
  -9 -12   0   98.49   14.70
  -9 -12   0   93.39    5.70
  -9 -12   0   86.19    8.50
  -9 -12   0  108.99   12.80
   9  12   0   79.29   12.50
   9  12   0   98.69   11.40
   9  12   0   83.89    9.10
   9  12   0  112.69   15.70
   9  12   0  113.39   12.10
   9  12   0   87.19   12.10
 -10 -12   0   43.50    8.50
 -10 -12   0   33.40    7.60
 -10 -12   0   42.50   11.10
 -10 -12   0   41.50   10.00
 -10 -12   0   25.30    6.10
  10  12   0   64.49   11.10
  10  12   0   35.10    5.90
  10  12   0   45.10    9.40
  10  12   0   45.90   11.30
  10  12   0   48.60   11.40
  10  12   0   50.79    9.70
 -11 -12   0  276.27   20.30
 -11 -12   0  267.97   19.50
 -11 -12   0  324.27   18.20
 -11 -12   0  267.87   20.60
 -11 -12   0  294.17   24.80
  11  12   0  226.68   16.80
  11  12   0  288.87   18.90
  11  12   0  250.37   19.80
  11  12   0  259.47   20.50
  11  12   0  270.97   24.20
  11  12   0  239.68   22.20
 -12 -12   0  230.78   19.80
 -12 -12   0  207.88   16.20
 -12 -12   0  236.68   24.00
  12  12   0  236.18   22.90
  12  12   0  224.88   18.00
  12  12   0  256.67   20.10
  12  12   0  210.78   19.20
 -13 -12   0  302.97   27.60
 -13 -12   0  274.87   18.90
 -13 -12   0  285.97   22.70
  13  12   0  256.97   25.10
  13  12   0  268.77   19.70
  13  12   0  254.97   29.40
  12 -13   0  277.17   25.90
  12 -13   0  293.77   23.80
  12 -13   0  295.97   18.20
  12 -13   0  275.57   19.30
 -12  13   0  318.57   25.30
 -12  13   0  332.27   23.80
 -12  13   0  301.07   26.90
 -12  13   0  305.37   26.20
  11 -13   0   -4.10    3.80
  11 -13   0    1.00    6.20
  11 -13   0   -1.70    6.60
  11 -13   0    0.80    5.20
  11 -13   0    0.20    4.40
 -11  13   0   -0.40   10.20
 -11  13   0    6.00    6.60
 -11  13   0    1.10    5.80
 -11  13   0   11.70    4.50
 -11  13   0   -1.10    6.00
 -11  13   0   -3.50    9.40
  10 -13   0  186.48   13.50
  10 -13   0  196.28   20.50
  10 -13   0  181.18   13.00
  10 -13   0  186.18   18.50
  10 -13   0  181.88   18.30
 -10  13   0  194.68   16.90
 -10  13   0  187.28   20.20
 -10  13   0  185.88   20.60
 -10  13   0  191.78   16.50
 -10  13   0  190.08   18.40
 -10  13   0  190.68   20.20
   9 -13   0   34.70    7.40
   9 -13   0   29.70    6.50
   9 -13   0   35.90    8.70
   9 -13   0   66.59    8.40
   9 -13   0   49.30   10.70
   9 -13   0   25.00    5.00
   9 -13   0   58.49   13.40
  -9  13   0   51.99   10.00
  -9  13   0   29.70    7.60
  -9  13   0   24.90    8.30
  -9  13   0   58.09   10.50
  -9  13   0   50.19    9.20
  -9  13   0   43.10   10.80
   8 -13   0    7.10    4.60
   8 -13   0    8.00    5.10
   8 -13   0    2.80    5.60
   8 -13   0    7.80    3.30
   8 -13   0    7.70    4.10
   8 -13   0    6.80    5.40
   8 -13   0    5.80    3.70
  -8  13   0   10.20    5.50
  -8  13   0   12.10    6.50
  -8  13   0    8.00    5.80
  -8  13   0    5.40    4.90
  -8  13   0   11.60    4.80
  -8  13   0    1.70    5.40
   7 -13   0    2.00    3.70
   7 -13   0    2.80    4.20
   7 -13   0    3.80    3.10
   7 -13   0    1.40    4.90
   7 -13   0    3.70    3.50
   7 -13   0    7.20    5.90
  -7  13   0    6.30    4.20
  -7  13   0    5.40    6.10
  -7  13   0    8.80    4.80
  -7  13   0    2.40    4.80
  -7  13   0    5.90    7.80
  -7  13   0   -2.20    4.50
   6 -13   0  270.07   18.60
   6 -13   0  255.97   17.20
   6 -13   0  269.17   17.00
   6 -13   0  255.57   19.30
   6 -13   0  276.17   14.40
   6 -13   0  252.27   19.80
   6 -13   0  254.57   13.00
  -6  13   0  266.97   18.60
  -6  13   0  255.87   17.20
  -6  13   0  270.37   15.90
  -6  13   0  231.88   19.60
  -6  13   0  257.07   18.60
  -6  13   0  276.07   20.80
  -6  13   0  248.58   16.60
   5 -13   0   62.29   11.00
   5 -13   0   52.49   10.50
   5 -13   0   66.19    5.20
   5 -13   0   68.19    9.50
   5 -13   0   60.59    5.70
   5 -13   0   68.19   11.00
   5 -13   0   50.79   10.00
   5 -13   0   65.29    7.30
  -5  13   0   65.59   11.30
  -5  13   0   63.49   10.30
  -5  13   0   71.69    9.70
  -5  13   0   54.69   11.10
  -5  13   0   66.49    9.30
  -5  13   0   42.50    7.60
  -5  13   0   64.89    9.80
  -5  13   0   54.39    8.60
   4 -13   0  564.04   29.60
   4 -13   0  532.45   22.60
   4 -13   0  523.95   28.80
   4 -13   0  593.24   29.10
   4 -13   0  541.65   24.50
  -4  13   0  514.05   27.90
  -4  13   0  538.85   26.50
  -4  13   0  516.35   25.20
  -4  13   0  533.35   29.40
  -4  13   0  553.24   30.00
  -4  13   0  518.65   26.50
  -4  13   0  553.24   28.30
   3 -13   0  472.35   20.50
   3 -13   0  442.56   25.10
   3 -13   0  441.66   25.10
   3 -13   0  437.06   23.80
   3 -13   0  482.65   25.70
   3 -13   0  450.85   19.00
  -3  13   0  407.36   25.10
  -3  13   0  423.46   21.60
  -3  13   0  422.46   24.10
  -3  13   0  458.65   22.80
  -3  13   0  446.96   24.20
  -3  13   0  429.86   22.80
  -3  13   0  472.85   25.60
   2 -13   0  298.87   14.40
   2 -13   0  291.27   17.40
   2 -13   0  306.57   19.40
   2 -13   0  303.77   19.40
   2 -13   0  279.87   17.40
   2 -13   0  308.77   13.70
   2 -13   0  297.97   19.60
  -2  13   0  311.57   17.20
  -2  13   0  296.17   18.50
  -2  13   0  311.57   18.80
  -2  13   0  318.97   20.10
  -2  13   0  296.37   16.20
  -2  13   0  275.97   16.90
  -2  13   0  298.47   19.20
   1 -13   0  980.50   41.00
   1 -13   0  928.71   37.30
   1 -13   0  927.11   36.50
   1 -13   0  925.61   36.10
   1 -13   0  951.90   43.20
   1 -13   0  898.31   40.80
   1 -13   0  991.40   43.90
   1 -13   0  964.70   43.00
  -1  13   0  953.20   42.20
  -1  13   0  999.70   42.10
  -1  13   0  927.91   43.40
  -1  13   0  947.41   39.60
  -1  13   0  960.80   40.20
  -1  13   0  913.21   40.50
  -1  13   0  901.61   41.90
  -1  13   0 1005.10   43.10
   0 -13   0   79.49   11.20
   0 -13   0   73.69   10.10
   0 -13   0   81.09    6.10
   0 -13   0   70.39    8.00
   0 -13   0   67.79    8.20
   0 -13   0   78.29    5.70
   0 -13   0   70.39    6.40
   0  13   0   92.29    9.80
   0  13   0   81.59    9.60
   0  13   0   71.59    8.50
   0  13   0   88.29   10.10
   0  13   0   69.59   10.20
   0  13   0   73.19    9.30
   0  13   0   74.39    7.80
   0  13   0   72.59    8.40
  -1 -13   0  497.35   20.90
  -1 -13   0  479.85   20.00
  -1 -13   0  449.95   23.80
  -1 -13   0  480.65   22.90
  -1 -13   0  451.65   26.40
  -1 -13   0  489.35   23.20
  -1 -13   0  504.45   26.50
   1  13   0  531.95   25.40
   1  13   0  472.05   23.20
   1  13   0  538.55   25.80
   1  13   0  454.05   25.20
   1  13   0  468.95   24.00
   1  13   0  489.55   23.90
   1  13   0  473.55   26.00
   1  13   0  444.26   22.60
   1  13   0  450.55   20.40
  -2 -13   0   -0.40    2.90
  -2 -13   0    6.00    4.50
  -2 -13   0    6.40    2.20
  -2 -13   0    3.90    2.60
  -2 -13   0    1.20    2.30
  -2 -13   0    4.60    2.70
  -2 -13   0    6.50    4.20
   2  13   0    6.60    3.90
   2  13   0    1.00    3.30
   2  13   0    7.20    4.50
   2  13   0    1.00    3.10
   2  13   0    2.10    2.90
   2  13   0    7.20    3.50
   2  13   0    1.00    2.50
   2  13   0    2.40    4.10
   2  13   0   -1.60    1.40
  -3 -13   0    0.80    3.10
  -3 -13   0   -0.40    2.50
  -3 -13   0   -0.70    2.30
  -3 -13   0   -0.30    3.70
  -3 -13   0    0.90    2.20
  -3 -13   0   -1.30    3.40
   3  13   0   -1.60    2.70
   3  13   0   -1.80    3.10
   3  13   0    2.40    3.80
   3  13   0    0.30    3.50
   3  13   0   -1.60    3.60
   3  13   0    3.30    3.10
   3  13   0    1.50    3.70
   3  13   0    0.00    1.30
  -4 -13   0   -0.50    2.10
  -4 -13   0   -1.40    1.90
  -4 -13   0    1.00    2.80
  -4 -13   0   -1.50    2.40
  -4 -13   0   -3.70    3.80
  -4 -13   0   -2.60    3.20
  -4 -13   0   -1.40    3.80
   4  13   0   -2.20    3.10
   4  13   0    2.90    3.60
   4  13   0    1.80    4.60
   4  13   0    2.00    3.50
   4  13   0    1.00    3.80
   4  13   0    0.90    1.50
   4  13   0    2.60    3.60
  -5 -13   0  384.16   26.20
  -5 -13   0  355.26   22.90
  -5 -13   0  365.16   17.70
  -5 -13   0  363.16   17.80
  -5 -13   0  387.16   20.30
  -5 -13   0  348.57   20.50
  -5 -13   0  355.96   17.20
   5  13   0  360.26   28.80
   5  13   0  333.37   20.30
   5  13   0  374.06   23.90
   5  13   0  339.97   24.20
   5  13   0  333.17   22.10
   5  13   0  350.76   20.00
  -6 -13   0  126.09   11.70
  -6 -13   0  100.09   11.60
  -6 -13   0  112.59    8.00
  -6 -13   0  130.19    8.60
  -6 -13   0  109.89    9.10
  -6 -13   0  119.29   14.50
   6  13   0   97.09    6.90
   6  13   0  104.79   12.60
   6  13   0  104.89   11.80
   6  13   0  114.59   11.50
   6  13   0  109.09   10.80
   6  13   0  127.99   11.70
   6  13   0  111.89   15.10
   6  13   0  108.89   12.60
  -7 -13   0  648.64   35.40
  -7 -13   0  609.34   31.60
  -7 -13   0  634.84   27.60
  -7 -13   0  612.84   26.00
  -7 -13   0  689.43   34.20
  -7 -13   0  660.53   28.50
  -7 -13   0  686.53   32.10
   7  13   0  611.04   30.50
   7  13   0  618.14   26.80
   7  13   0  662.83   36.60
   7  13   0  573.24   33.40
   7  13   0  601.54   31.70
   7  13   0  607.94   32.30
  -8 -13   0  176.38   18.10
  -8 -13   0  171.98    9.40
  -8 -13   0  185.68   12.00
  -8 -13   0  194.28   12.80
  -8 -13   0  178.08   15.50
  -8 -13   0  177.18   15.50
  -8 -13   0  188.18   16.80
   8  13   0  173.58   15.90
   8  13   0  182.28   15.10
   8  13   0  190.08   17.20
   8  13   0  191.58   15.00
   8  13   0  183.88   11.60
   8  13   0  185.08   18.70
  -9 -13   0  194.18   19.30
  -9 -13   0  219.98   13.50
  -9 -13   0  210.38   17.40
  -9 -13   0  205.38   17.40
  -9 -13   0  210.88   17.50
  -9 -13   0  217.18   14.30
   9  13   0  195.18   18.10
   9  13   0  202.78   20.60
   9  13   0  200.38   16.00
   9  13   0  239.78   18.10
   9  13   0  178.08   12.70
   9  13   0  195.78   16.70
 -10 -13   0  450.85   27.60
 -10 -13   0  476.15   28.40
 -10 -13   0  492.85   32.80
 -10 -13   0  471.15   24.20
 -10 -13   0  482.15   28.40
  10  13   0  501.05   32.60
  10  13   0  508.15   28.80
  10  13   0  522.15   27.00
  10  13   0  421.96   33.00
  10  13   0  423.36   23.60
  10  13   0  467.45   28.00
 -11 -13   0   15.90    5.70
 -11 -13   0   29.60    9.70
 -11 -13   0   29.60    7.30
 -11 -13   0   25.70    6.30
 -11 -13   0   28.90    9.40
  11  13   0   24.40    6.70
  11  13   0   37.00    8.90
  11  13   0   24.90    5.60
  11  13   0   31.90    8.50
  11  13   0   26.50    6.80
  11  13   0   23.50    9.00
 -12 -13   0  295.57   19.00
 -12 -13   0  289.97   22.60
 -12 -13   0  318.37   29.40
  12  13   0  288.07   28.30
  12  13   0  270.27   24.90
  12  13   0  287.27   25.80
  11 -14   0    0.90    8.10
  11 -14   0   -5.70    5.80
  11 -14   0   -3.90    4.70
  11 -14   0    1.20    4.60
  11 -14   0  -10.30    5.90
  11 -14   0    2.10    5.10
 -11  14   0   -6.80    5.80
 -11  14   0    1.00    6.40
 -11  14   0   -2.10    5.70
  10 -14   0  175.78   16.50
  10 -14   0  171.58   12.10
  10 -14   0  163.28   19.20
  10 -14   0  176.08   18.70
  10 -14   0  194.48   13.30
 -10  14   0  185.78   21.80
 -10  14   0  157.48   16.90
 -10  14   0  162.68   20.40
 -10  14   0  193.98   19.10
 -10  14   0  157.58   15.70
   9 -14   0   88.39   12.50
   9 -14   0   92.99    9.90
   9 -14   0  106.19   10.00
   9 -14   0   92.29    9.20
   9 -14   0   75.89   14.10
   9 -14   0  103.29   15.00
  -9  14   0   82.79   13.70
  -9  14   0  114.79   13.80
  -9  14   0   92.79   11.90
  -9  14   0   96.89   16.50
  -9  14   0   82.49   13.00
  -9  14   0   99.69   16.10
   8 -14   0  318.57   22.20
   8 -14   0  414.06   26.70
   8 -14   0  362.96   18.20
   8 -14   0  345.97   25.10
   8 -14   0  392.96   23.40
   8 -14   0  375.86   19.00
   8 -14   0  376.86   18.70
  -8  14   0  384.96   27.10
  -8  14   0  377.76   25.10
  -8  14   0  345.97   24.80
  -8  14   0  413.46   24.30
  -8  14   0  392.56   23.40
  -8  14   0  364.76   26.80
   7 -14   0  254.77   14.30
   7 -14   0  269.97   18.80
   7 -14   0  304.87   22.30
   7 -14   0  279.07   15.60
   7 -14   0  306.77   20.50
   7 -14   0  296.27   22.30
   7 -14   0  296.27   14.90
  -7  14   0  286.27   19.00
  -7  14   0  314.67   21.80
  -7  14   0  321.97   21.30
  -7  14   0  330.47   24.10
  -7  14   0  293.87   23.40
  -7  14   0  348.97   20.90
   6 -14   0  169.18   16.80
   6 -14   0  196.38   11.50
   6 -14   0  216.58   25.90
   6 -14   0  174.98    9.60
   6 -14   0  194.88   17.20
  -6  14   0  187.38   16.80
  -6  14   0  189.18   17.60
  -6  14   0  165.28   15.60
  -6  14   0  194.28   18.00
  -6  14   0  173.98   14.50
   5 -14   0  782.92   42.20
   5 -14   0  690.73   28.40
   5 -14   0  703.33   29.20
   5 -14   0  765.12   37.50
   5 -14   0  713.33   36.40
  -5  14   0  645.74   31.40
  -5  14   0  714.43   33.60
  -5  14   0  751.92   35.90
  -5  14   0  601.64   32.20
  -5  14   0  693.53   37.10
  -5  14   0  619.34   34.00
  -5  14   0  745.63   37.40
   4 -14   0   -0.90    4.10
   4 -14   0   -0.20    4.00
   4 -14   0    2.10    4.40
   4 -14   0    2.00    2.20
   4 -14   0    2.00    4.00
   4 -14   0    2.80    4.90
  -4  14   0    2.30    4.10
  -4  14   0    3.80    5.40
  -4  14   0    5.10    4.40
  -4  14   0    2.10    3.20
  -4  14   0   -1.70    4.50
  -4  14   0   -0.60    4.70
  -4  14   0    6.30    4.10
   3 -14   0  191.18   17.90
   3 -14   0  231.88   17.70
   3 -14   0  222.58   11.10
   3 -14   0  226.58   11.90
   3 -14   0  237.68   18.50
   3 -14   0  243.98   18.20
  -3  14   0  258.87   18.50
  -3  14   0  215.28   15.30
  -3  14   0  218.28   15.00
  -3  14   0  205.18   16.10
  -3  14   0  241.48   19.10
  -3  14   0  219.38   16.30
  -3  14   0  243.48   17.20
  -3  14   0  209.28   18.90
   2 -14   0   69.59    6.50
   2 -14   0   93.99   11.60
   2 -14   0   78.59    5.70
   2 -14   0   77.99   12.00
   2 -14   0   85.29   11.80
  -2  14   0   74.89    9.20
  -2  14   0   60.49    9.20
  -2  14   0   76.19    8.10
  -2  14   0   54.59    8.40
  -2  14   0   70.19   10.90
  -2  14   0   95.69   12.00
  -2  14   0   80.99   11.80
   1 -14   0   19.60    5.80
   1 -14   0   15.50    4.70
   1 -14   0   10.60    4.80
   1 -14   0   20.80    3.60
   1 -14   0   10.20    6.30
   1 -14   0   20.30    3.70
   1 -14   0   15.20    3.50
  -1  14   0   18.10    5.30
  -1  14   0   16.30    4.70
  -1  14   0   14.80    4.90
  -1  14   0   24.10    6.50
  -1  14   0   17.60    4.40
  -1  14   0   18.30    5.00
   0 -14   0    6.70    2.40
   0 -14   0    2.70    4.10
   0 -14   0    3.50    2.20
   0 -14   0    5.60    3.20
   0 -14   0    3.40    2.90
   0 -14   0    3.90    4.20
   0  14   0   -2.20    3.90
   0  14   0    5.80    4.10
   0  14   0    2.50    3.60
   0  14   0    8.20    3.70
   0  14   0    8.10    4.20
   0  14   0    2.60    3.60
   0  14   0    8.50    5.60
  -1 -14   0  439.96   19.00
  -1 -14   0  457.25   25.40
  -1 -14   0  425.26   21.70
  -1 -14   0  436.06   18.10
  -1 -14   0  441.16   19.70
  -1 -14   0  428.46   28.50
   1  14   0  421.56   21.60
   1  14   0  420.76   25.10
   1  14   0  375.26   23.30
   1  14   0  430.36   22.50
   1  14   0  433.46   26.70
   1  14   0  463.25   22.30
   1  14   0  420.66   22.90
   1  14   0  389.06   18.70
  -2 -14   0  298.97   29.80
  -2 -14   0  264.27   19.20
  -2 -14   0  288.47   13.80
  -2 -14   0  277.87   15.70
  -2 -14   0  278.57   14.90
   2  14   0  248.68   17.80
   2  14   0  261.37   15.90
   2  14   0  274.57   16.80
   2  14   0  256.87   12.00
   2  14   0  273.17   17.10
   2  14   0  288.27   16.70
   2  14   0  283.37   19.60
  -3 -14   0  457.35   22.30
  -3 -14   0  461.55   22.60
  -3 -14   0  476.85   28.20
  -3 -14   0  472.85   20.00
  -3 -14   0  437.86   26.90
   3  14   0  492.05   24.10
   3  14   0  462.45   24.50
   3  14   0  479.35   23.40
   3  14   0  495.15   25.90
   3  14   0  487.55   26.80
   3  14   0  446.06   25.80
  -4 -14   0  663.33   27.70
  -4 -14   0  669.03   28.70
  -4 -14   0  608.74   31.50
  -4 -14   0  648.04   34.60
  -4 -14   0  679.83   30.30
  -4 -14   0  667.23   27.00
  -4 -14   0  650.73   34.60
   4  14   0  581.04   30.80
   4  14   0  646.14   36.80
   4  14   0  661.23   32.60
   4  14   0  612.94   32.40
   4  14   0  696.43   31.20
   4  14   0  648.64   30.70
   4  14   0  709.13   41.40
  -5 -14   0  313.87   16.10
  -5 -14   0  306.27   19.40
  -5 -14   0  313.67   18.70
  -5 -14   0  322.87   22.60
  -5 -14   0  329.67   22.40
  -5 -14   0  332.17   16.10
   5  14   0  286.37   18.30
   5  14   0  301.47   20.70
   5  14   0  313.17   19.60
   5  14   0  337.47   23.70
   5  14   0  318.77   18.80
   5  14   0  302.37   20.10
  -6 -14   0  645.64   28.00
  -6 -14   0  672.63   27.50
  -6 -14   0  663.13   34.70
  -6 -14   0  618.44   31.90
  -6 -14   0  618.14   27.10
  -6 -14   0  649.34   35.50
  -6 -14   0  679.03   31.50
   6  14   0  659.03   37.00
   6  14   0  637.64   32.10
   6  14   0  603.84   25.00
   6  14   0  672.13   33.50
   6  14   0  602.74   32.90
   6  14   0  576.54   33.60
  -7 -14   0    9.80    3.40
  -7 -14   0    6.70    6.20
  -7 -14   0    5.20    4.30
  -7 -14   0    4.50    2.40
  -7 -14   0    7.00    4.30
  -7 -14   0    5.70    4.60
  -7 -14   0   11.60    4.10
   7  14   0    7.60    4.80
   7  14   0    7.90    5.40
   7  14   0    4.60    2.40
   7  14   0    4.80    4.90
   7  14   0    7.50    5.10
   7  14   0   15.90    7.30
  -8 -14   0  113.59    9.50
  -8 -14   0   96.89   14.00
  -8 -14   0  119.19   13.00
  -8 -14   0  121.19   10.30
  -8 -14   0  113.69    7.10
  -8 -14   0  119.49   13.30
  -8 -14   0  145.49   17.00
   8  14   0  121.29   17.00
   8  14   0   97.19    8.30
   8  14   0  122.69   14.30
   8  14   0  120.79   12.90
   8  14   0  127.09   12.70
   8  14   0   98.19   13.80
  -9 -14   0    0.60    4.70
  -9 -14   0    3.00    5.10
  -9 -14   0   -6.20    3.50
  -9 -14   0    1.70    6.30
  -9 -14   0    0.00    3.50
  -9 -14   0   -2.30    3.70
   9  14   0    8.60    5.40
   9  14   0  -11.90    4.80
   9  14   0    0.70    6.50
   9  14   0   -5.90    2.30
   9  14   0    4.70    4.90
   9  14   0    3.40    4.40
 -10 -14   0   13.70    5.40
 -10 -14   0   14.10    8.60
 -10 -14   0    2.70    4.70
 -10 -14   0   -0.10    3.80
 -10 -14   0   13.20    5.30
  10  14   0   25.50    7.30
  10  14   0   16.10    8.10
  10  14   0    7.80    3.80
  10  14   0   14.10    6.00
  10  14   0   17.10    6.50
  10  14   0   24.50    8.90
 -11 -14   0   -4.90    4.20
 -11 -14   0   -1.90    3.80
 -11 -14   0    5.30    4.90
 -11 -14   0   -7.10    4.30
 -11 -14   0   -1.30    6.70
  11  14   0   -5.00    5.50
  11  14   0   -3.10    5.50
  11  14   0  -11.30    3.60
  11  14   0  -14.50    4.60
 -12 -14   0  160.78   21.60
  12  14   0  176.38   21.00
  12  14   0  187.48   19.00
  12  14   0  176.08   16.10
  10 -15   0   48.10    9.80
  10 -15   0   23.60    5.50
  10 -15   0   40.50   11.10
  10 -15   0   38.40    8.00
  10 -15   0   35.30    9.10
 -10  15   0   51.69   11.70
 -10  15   0   59.59   14.10
 -10  15   0   68.29   16.20
 -10  15   0   64.79   13.40
   9 -15   0  329.77   25.10
   9 -15   0  318.87   24.80
   9 -15   0  285.37   16.40
   9 -15   0  333.47   22.40
   9 -15   0  342.27   17.10
   9 -15   0  297.57   16.30
  -9  15   0  360.16   23.20
  -9  15   0  323.77   27.40
  -9  15   0  316.67   20.80
  -9  15   0  288.87   24.10
   8 -15   0   -5.50    2.40
   8 -15   0    3.20    3.70
   8 -15   0   -5.80    5.10
   8 -15   0   -2.20    3.40
   8 -15   0    0.00    3.50
   8 -15   0   -3.60    4.40
   8 -15   0    3.50    5.90
  -8  15   0    3.80    6.00
  -8  15   0   -0.60    6.60
  -8  15   0    7.90    5.20
  -8  15   0    3.00    5.40
  -8  15   0    2.10    5.60
  -8  15   0    7.90    4.70
   7 -15   0    6.20    6.20
   7 -15   0    3.40    5.80
   7 -15   0    8.30    5.70
   7 -15   0    9.60    2.70
   7 -15   0   11.60    3.70
  -7  15   0   11.30    5.20
  -7  15   0    8.60    5.00
  -7  15   0    7.20    6.80
  -7  15   0   15.80    6.50
  -7  15   0   14.70    6.70
  -7  15   0    7.90    5.60
   6 -15   0   25.80    5.30
   6 -15   0   15.40    5.60
   6 -15   0   27.80    6.10
   6 -15   0   20.30    7.00
   6 -15   0   18.80    6.50
  -6  15   0   23.80    7.00
  -6  15   0   14.30    6.90
  -6  15   0   20.90    5.90
  -6  15   0   15.60    6.00
  -6  15   0   26.80    7.00
  -6  15   0   19.40    6.80
   5 -15   0  109.09   15.90
   5 -15   0   89.69    6.80
   5 -15   0   76.29   13.00
   5 -15   0   77.59   12.80
  -5  15   0   71.19   10.50
  -5  15   0   68.09   10.70
  -5  15   0   86.79   13.20
  -5  15   0   87.69   11.70
  -5  15   0   78.39   14.10
  -5  15   0  102.29   13.00
   4 -15   0    6.00    5.60
   4 -15   0    6.30    4.50
   4 -15   0    2.30    4.70
   4 -15   0    3.60    3.10
   4 -15   0    5.70    5.00
   4 -15   0    1.30    2.40
  -4  15   0    0.70    4.30
  -4  15   0    3.40    5.30
  -4  15   0    3.80    5.20
  -4  15   0   -0.10    5.00
  -4  15   0    2.80    3.90
  -4  15   0   -3.30    3.30
   3 -15   0  366.16   21.20
   3 -15   0  391.26   24.40
   3 -15   0  403.56   24.80
   3 -15   0  394.46   24.10
   3 -15   0  388.46   16.30
   3 -15   0  379.16   16.90
  -3  15   0  378.66   27.70
  -3  15   0  389.46   23.50
  -3  15   0  381.96   24.60
  -3  15   0  397.96   21.90
  -3  15   0  330.27   20.80
  -3  15   0  376.06   20.50
   2 -15   0  164.08    9.10
   2 -15   0  143.29   12.50
   2 -15   0  153.98    8.30
   2 -15   0  154.58   15.10
   2 -15   0  169.28   16.10
   2 -15   0  158.08   15.00
  -2  15   0  159.18   13.90
  -2  15   0  156.48   12.90
  -2  15   0  144.39   11.80
  -2  15   0  174.78   15.90
  -2  15   0  148.89   14.90
  -2  15   0  177.38   15.30
  -2  15   0  157.98   13.10
   1 -15   0  462.05   26.80
   1 -15   0  417.76   17.60
   1 -15   0  398.66   24.90
   1 -15   0  399.46   22.60
   1 -15   0  427.86   25.50
   1 -15   0  431.46   18.40
   1 -15   0  428.26   17.70
  -1  15   0  459.85   25.00
  -1  15   0  432.26   25.00
  -1  15   0  395.26   22.80
  -1  15   0  443.56   23.00
  -1  15   0  454.75   22.30
  -1  15   0  426.16   25.90
  -1  15   0  437.96   24.60
   0 -15   0  663.93   34.70
   0 -15   0  724.73   36.50
   0 -15   0  635.24   32.20
   0 -15   0  647.74   31.70
   0 -15   0  665.43   27.60
   0 -15   0  715.73   27.40
   0 -15   0  669.93   26.60
   0 -15   0  628.54   31.60
   0  15   0  707.63   32.10
   0  15   0  659.43   33.60
   0  15   0  588.84   31.40
   0  15   0  733.33   33.90
   0  15   0  713.63   35.60
   0  15   0  761.62   34.40
   0  15   0  708.53   31.40
  -1 -15   0   50.59    8.70
  -1 -15   0   50.99   10.00
  -1 -15   0   47.40    5.50
  -1 -15   0   63.89    6.50
  -1 -15   0   55.79   12.00
  -1 -15   0   44.60    7.70
  -1 -15   0   42.50    7.60
  -1 -15   0   46.20    4.50
   1  15   0   47.40   10.30
   1  15   0   52.69    7.80
   1  15   0   46.80    9.50
   1  15   0   62.69    9.80
   1  15   0   46.00    5.30
   1  15   0   39.30    8.30
   1  15   0   56.29    9.30
   1  15   0   40.70    7.40
  -2 -15   0  460.15   26.20
  -2 -15   0  430.46   26.20
  -2 -15   0  446.16   21.00
  -2 -15   0  425.16   18.80
  -2 -15   0  417.36   21.90
  -2 -15   0  435.26   18.30
  -2 -15   0  471.35   27.70
   2  15   0  386.96   24.30
   2  15   0  455.45   26.30
   2  15   0  443.86   23.20
   2  15   0  473.55   25.40
   2  15   0  377.76   22.70
   2  15   0  452.75   22.70
   2  15   0  428.86   23.30
  -3 -15   0   -0.80    2.60
  -3 -15   0   -1.00    4.10
  -3 -15   0   -2.00    4.70
  -3 -15   0    2.70    4.60
  -3 -15   0    0.40    2.90
   3  15   0   -0.70    2.80
   3  15   0    0.00    3.40
   3  15   0   -1.60    3.10
   3  15   0    6.00    4.30
   3  15   0    5.70    5.20
   3  15   0    0.90    4.20
  -4 -15   0  118.89   15.20
  -4 -15   0  120.59    8.50
  -4 -15   0  109.69    9.40
  -4 -15   0  114.99    7.60
  -4 -15   0  118.79   11.10
  -4 -15   0  110.49   20.80
   4  15   0  125.99   13.10
   4  15   0  139.39   16.20
   4  15   0  103.79   11.20
   4  15   0  112.49   13.30
   4  15   0  112.09   11.80
   4  15   0  136.39   12.20
  -5 -15   0   -2.20    2.40
  -5 -15   0    2.10    5.60
  -5 -15   0    0.20    3.40
  -5 -15   0    5.60    2.90
  -5 -15   0    1.10    4.70
   5  15   0    4.50    4.80
   5  15   0    0.70    3.80
   5  15   0    3.80    5.90
   5  15   0    3.00    6.70
   5  15   0    2.20    4.20
  -6 -15   0   41.00    6.50
  -6 -15   0   29.60    7.80
  -6 -15   0   41.70    9.20
  -6 -15   0   35.00    9.10
  -6 -15   0   45.40    5.80
   6  15   0   45.70    9.20
   6  15   0   46.80   11.20
   6  15   0   31.10    7.10
   6  15   0   28.10    7.30
   6  15   0   24.70    7.10
  -7 -15   0    2.60    3.10
  -7 -15   0    3.90    4.80
  -7 -15   0    1.50    5.60
  -7 -15   0    7.00    4.30
  -7 -15   0    0.60    3.30
  -7 -15   0    0.10    4.00
  -7 -15   0   -2.00    2.20
   7  15   0    5.90    5.10
   7  15   0    2.00    6.00
   7  15   0    7.10    4.80
   7  15   0    6.20    6.10
   7  15   0    0.40    5.00
  -8 -15   0  250.67   14.40
  -8 -15   0  274.07   22.60
  -8 -15   0  245.88   12.20
  -8 -15   0  271.67   19.60
  -8 -15   0  279.17   15.20
  -8 -15   0  261.87   21.00
   8  15   0  262.17   18.10
   8  15   0  258.27   22.90
   8  15   0  253.17   18.90
   8  15   0  237.98   13.00
   8  15   0  196.18   19.80
   8  15   0  281.17   20.20
  -9 -15   0  144.29   10.80
  -9 -15   0  136.29   15.20
  -9 -15   0  149.99   11.80
  -9 -15   0  173.48   19.50
  -9 -15   0  111.59   15.50
   9  15   0  145.19   18.50
   9  15   0  122.69    9.60
   9  15   0  143.19   27.70
   9  15   0  136.99   15.70
   9  15   0  143.99   14.90
   9  15   0  140.09   14.50
 -10 -15   0  303.87   22.40
 -10 -15   0  309.97   17.80
 -10 -15   0  304.37   22.80
 -10 -15   0  309.67   26.70
  10  15   0  359.66   28.00
  10  15   0  314.67   25.50
  10  15   0  292.67   16.90
  10  15   0  266.07   24.00
  10  15   0  326.67   21.40
  10  15   0  283.77   22.80
 -11 -15   0  223.08   20.30
 -11 -15   0  209.08   19.30
 -11 -15   0  191.58   14.80
 -11 -15   0  207.98   24.20
  11  15   0  246.08   23.80
  11  15   0  216.68   19.90
  11  15   0  218.18   17.70
   9 -16   0   31.40    7.30
   9 -16   0   25.30    8.40
  -9  16   0   37.30    9.30
  -9  16   0   36.80    9.50
  -9  16   0   46.60   11.30
  -9  16   0   45.30    9.90
   8 -16   0    4.10    1.90
   8 -16   0    0.90    5.20
   8 -16   0   -2.50    2.70
   8 -16   0   -5.50    6.00
   8 -16   0    9.10    9.50
  -8  16   0    6.00    5.00
  -8  16   0   -2.30   10.70
  -8  16   0   11.10    6.50
  -8  16   0    7.10    6.10
  -8  16   0   21.00    5.70
  -8  16   0    7.00    8.40
   7 -16   0  226.98   12.10
   7 -16   0  263.27   22.00
   7 -16   0  233.18   21.00
   7 -16   0  266.07   20.60
  -7  16   0  274.67   23.50
  -7  16   0  283.07   21.70
  -7  16   0  251.87   22.50
  -7  16   0  237.08   18.90
  -7  16   0  231.08   19.90
  -7  16   0  256.47   18.80
   6 -16   0  113.39   15.40
   6 -16   0  111.19    7.70
   6 -16   0   90.49   11.50
   6 -16   0  141.19   16.10
   6 -16   0  117.19   15.90
  -6  16   0  139.09   17.60
  -6  16   0  135.89   13.20
  -6  16   0  115.79   14.10
  -6  16   0  143.29   14.90
  -6  16   0  141.19   15.90
  -6  16   0  143.89   16.30
   5 -16   0  362.86   15.70
   5 -16   0  380.36   25.30
   5 -16   0  390.66   25.00
   5 -16   0  326.07   21.40
   5 -16   0  391.96   25.80
   5 -16   0  355.76   15.90
  -5  16   0  418.66   26.90
  -5  16   0  323.37   21.10
  -5  16   0  388.36   23.00
  -5  16   0  376.16   25.90
  -5  16   0  369.26   24.60
  -5  16   0  335.97   23.00
   4 -16   0  444.26   27.90
   4 -16   0  469.35   19.00
   4 -16   0  445.06   18.60
   4 -16   0  458.95   25.00
   4 -16   0  494.45   28.70
   4 -16   0  393.96   31.00
  -4  16   0  478.35   29.10
  -4  16   0  484.05   29.60
  -4  16   0  398.16   25.60
  -4  16   0  474.35   25.40
  -4  16   0  467.45   27.80
  -4  16   0  491.45   25.90
   3 -16   0  114.79   13.90
   3 -16   0  113.29    6.40
   3 -16   0  116.79   14.50
   3 -16   0  124.59   14.80
   3 -16   0  105.19    6.80
   3 -16   0  109.49   11.80
  -3  16   0  123.09   14.40
  -3  16   0  108.09   14.20
  -3  16   0  129.79   12.70
  -3  16   0  108.49   12.60
  -3  16   0  119.89   14.80
  -3  16   0  119.39   12.60
   2 -16   0  245.38   17.00
   2 -16   0  251.27   11.40
   2 -16   0  241.18   20.60
   2 -16   0  278.17   20.30
  -2  16   0  234.88   17.80
  -2  16   0  286.47   20.40
  -2  16   0  239.68   17.00
  -2  16   0  266.37   22.40
  -2  16   0  265.57   19.40
  -2  16   0  281.97   21.00
   1 -16   0   -4.30    4.40
   1 -16   0   -0.50    4.30
   1 -16   0    0.80    1.90
   1 -16   0   -0.60    4.10
   1 -16   0   -0.30    3.90
  -1  16   0   -3.70    4.50
  -1  16   0   -0.80    5.50
  -1  16   0   -4.40    4.40
  -1  16   0   -0.60    3.80
  -1  16   0    1.90    5.10
  -1  16   0   -1.20    4.20
   0 -16   0   59.09   11.30
   0 -16   0   55.49    5.80
   0 -16   0   44.00    8.90
   0 -16   0   53.19    4.30
   0 -16   0   58.99   12.60
   0 -16   0   55.69    4.80
   0  16   0   47.20   10.80
   0  16   0   34.00   11.80
   0  16   0   68.89   10.00
   0  16   0   43.40    6.50
   0  16   0   50.79    9.30
   0  16   0   60.79   11.20
   0  16   0   61.39   11.00
  -1 -16   0  126.99    6.90
  -1 -16   0  105.59   13.80
  -1 -16   0  117.99   16.10
  -1 -16   0  104.19    6.30
  -1 -16   0  119.09    8.70
  -1 -16   0  104.59   11.70
   1  16   0  141.19   12.40
   1  16   0  101.09   11.30
   1  16   0  125.09   12.80
   1  16   0  114.29   13.60
   1  16   0  117.19   13.70
   1  16   0  105.09   13.90
   1  16   0   99.29    7.70
  -2 -16   0  209.18   15.90
  -2 -16   0  242.38   11.20
  -2 -16   0  243.18   15.50
  -2 -16   0  252.77   19.60
  -2 -16   0  237.68   13.90
  -2 -16   0  243.38   20.60
  -2 -16   0  231.28   10.70
   2  16   0  233.48   18.60
   2  16   0  239.58   16.50
   2  16   0  216.08   17.40
   2  16   0  234.78   16.60
   2  16   0  224.28   17.20
   2  16   0  231.78   18.20
  -3 -16   0   20.20    3.90
  -3 -16   0   14.80    5.40
  -3 -16   0   19.80    3.50
  -3 -16   0   18.70    4.50
  -3 -16   0   43.20    9.60
  -3 -16   0   22.60    4.60
  -3 -16   0   18.10    6.80
   3  16   0   18.40    6.10
   3  16   0   34.70    8.00
   3  16   0   27.50    7.30
   3  16   0   28.00    5.60
  -4 -16   0  355.86   28.30
  -4 -16   0  334.07   18.40
  -4 -16   0  331.87   19.40
  -4 -16   0  386.66   25.20
  -4 -16   0  331.27   24.30
   4  16   0  386.06   21.60
   4  16   0  309.77   24.20
   4  16   0  355.16   21.50
   4  16   0  371.66   23.00
   4  16   0  300.17   21.90
  -5 -16   0  192.98   10.80
  -5 -16   0  192.78   10.30
  -5 -16   0  188.58   18.50
  -5 -16   0  183.78   12.30
  -5 -16   0  194.88   18.40
  -5 -16   0  197.48   14.70
   5  16   0  200.88   16.70
   5  16   0  177.18   18.50
   5  16   0  186.18   14.80
   5  16   0  189.28   17.20
   5  16   0  164.88   15.10
  -6 -16   0  328.27   20.50
  -6 -16   0  316.87   16.60
  -6 -16   0  311.47   24.00
  -6 -16   0  328.77   15.70
  -6 -16   0  285.07   23.10
   6  16   0  328.27   25.80
   6  16   0  312.17   22.10
   6  16   0  302.97   22.20
   6  16   0  331.17   21.50
   6  16   0  315.07   20.20
  -7 -16   0  381.26   26.40
  -7 -16   0  390.56   27.50
  -7 -16   0  342.27   17.60
  -7 -16   0  396.26   18.00
  -7 -16   0  410.76   23.60
  -7 -16   0  392.46   18.30
   7  16   0  406.66   29.20
   7  16   0  373.76   23.20
   7  16   0  386.46   25.30
   7  16   0  310.87   24.60
   7  16   0  379.76   24.20
  -8 -16   0   87.39    8.10
  -8 -16   0   83.19   12.40
  -8 -16   0   68.79    8.20
  -8 -16   0   62.39   14.40
  -8 -16   0   79.79   14.30
   8  16   0   75.29   13.30
   8  16   0   92.19   16.60
   8  16   0   61.49   11.00
   8  16   0   70.69   13.70
   8  16   0   83.69   12.50
  -9 -16   0  217.78   13.90
  -9 -16   0  204.68   13.70
  -9 -16   0  195.38   20.00
  -9 -16   0  227.08   23.20
  -9 -16   0  233.08   19.10
   9  16   0  218.68   19.10
   9  16   0  217.58   17.60
   9  16   0  198.38   21.00
   9  16   0  245.68   23.50
   7 -17   0   12.90    7.10
   7 -17   0   -5.00    4.50
   7 -17   0    6.60    6.00
   7 -17   0    0.60    4.10
  -7  17   0   -1.90    6.20
  -7  17   0   22.30    9.20
  -7  17   0    6.50    5.80
  -7  17   0   23.70    8.60
   6 -17   0  147.79   17.50
   6 -17   0  139.59   16.50
  -6  17   0  130.39   17.30
  -6  17   0  136.29   14.00
  -6  17   0  135.19   19.40
  -6  17   0  172.38   20.00
  -6  17   0  134.39   15.00
  -6  17   0  114.69   14.80
   5 -17   0   14.90    6.80
   5 -17   0   14.30    6.40
   5 -17   0    6.70    6.00
   5 -17   0   -5.10    3.40
  -5  17   0   10.50    5.80
  -5  17   0    3.80    6.80
  -5  17   0    7.60    5.60
  -5  17   0   10.60    6.20
  -5  17   0   11.40    6.40
  -5  17   0    7.00    6.50
   4 -17   0    1.90    4.50
   4 -17   0    9.40    6.40
   4 -17   0    1.50    4.80
   4 -17   0    5.70    6.00
  -4  17   0   -1.10    5.10
  -4  17   0    7.80    5.70
  -4  17   0    1.00    4.40
  -4  17   0    4.50    6.50
  -4  17   0   -4.10    4.60
  -4  17   0   -1.10    5.40
   3 -17   0   12.60    5.60
   3 -17   0   -1.50    5.70
   3 -17   0   -0.30    4.70
   3 -17   0   12.70    6.70
  -3  17   0    1.20    5.80
  -3  17   0    7.00    4.70
  -3  17   0    4.00    4.80
  -3  17   0    8.50    5.50
  -3  17   0    6.70    6.00
  -3  17   0    9.70    5.80
   2 -17   0  134.49   15.20
   2 -17   0  155.98   17.10
   2 -17   0  133.59   13.40
  -2  17   0  148.99   15.30
  -2  17   0  140.99   15.30
  -2  17   0  143.49   16.40
  -2  17   0  148.29   16.10
  -2  17   0  118.79   13.70
  -2  17   0  135.79   13.90
   1 -17   0   59.69   10.40
   1 -17   0   54.49   13.00
   1 -17   0   62.69   12.40
  -1  17   0   82.79   13.50
  -1  17   0   61.19   11.50
  -1  17   0   51.59   12.50
  -1  17   0   60.29    7.90
  -1  17   0   62.49   10.90
  -1  17   0   50.19   10.60
  -1  17   0   52.59   11.10
   0 -17   0  373.46   16.60
   0 -17   0  362.96   21.90
   0 -17   0  368.26   25.00
   0 -17   0  405.06   26.70
   0  17   0  342.27   23.00
   0  17   0  346.07   18.20
   0  17   0  416.96   23.00
   0  17   0  366.56   23.60
   0  17   0  364.86   25.00
  -1 -17   0   87.99    7.90
  -1 -17   0   89.29   14.50
  -1 -17   0   93.39   11.70
  -1 -17   0  104.89   14.20
   1  17   0   87.39   11.80
   1  17   0   80.29   11.90
   1  17   0   87.29   11.90
   1  17   0   96.99   12.00
   1  17   0   80.79    6.90
   1  17   0  111.39   13.50
   1  17   0   80.89   13.60
  -2 -17   0  321.47   23.20
  -2 -17   0  324.47   20.60
  -2 -17   0  322.07   17.20
  -2 -17   0  331.47   25.00
   2  17   0  347.97   21.10
   2  17   0  324.07   23.40
   2  17   0  322.07   20.50
   2  17   0  310.47   20.20
   2  17   0  389.26   23.20
   2  17   0  297.87   21.30
  -3 -17   0  309.67   19.00
  -3 -17   0  376.66   34.20
  -3 -17   0  343.27   18.80
  -3 -17   0  318.57   21.30
  -3 -17   0  355.36   25.60
   3  17   0  351.26   21.10
   3  17   0  330.87   22.50
   3  17   0  327.17   22.30
   3  17   0  326.37   20.80
  -4 -17   0   60.89   13.50
  -4 -17   0   56.29    9.00
  -4 -17   0   51.39    8.60
  -4 -17   0   52.29    4.60
  -4 -17   0   58.59   10.20
  -4 -17   0   57.69    4.70
  -4 -17   0   65.59   12.80
   4  17   0   74.99   14.10
   4  17   0   56.69   10.10
   4  17   0   79.79   11.60
   4  17   0   85.29   12.50
   4  17   0   58.29   10.80
  -5 -17   0  215.08   20.20
  -5 -17   0  177.48   12.90
  -5 -17   0  209.58   19.40
  -5 -17   0  196.08   15.20
   5  17   0  156.08   16.60
   5  17   0  201.58   16.40
   5  17   0  207.78   16.50
   5  17   0  192.78   17.30
   5  17   0  229.28   20.80
  -6 -17   0   -2.60    5.70
  -6 -17   0    6.80    6.20
  -6 -17   0    0.10    3.30
  -6 -17   0   -0.80    4.00
   6  17   0    9.40    5.50
   6  17   0   -0.30    5.90
   6  17   0   -2.20    6.70
   6  17   0    2.10    5.30
   6  17   0    5.70    5.30
  -7 -17   0   -0.70    4.30
  -7 -17   0    3.60    4.50
  -7 -17   0    4.00    6.00
  -7 -17   0   -2.20    6.30
   7  17   0   10.90    5.90
   7  17   0   -2.20    5.30
   7  17   0   14.90    8.80
   7  17   0    4.00    5.00
   7  17   0    2.80    5.50
  -8 -17   0   -0.40    6.10
  -8 -17   0   -3.60    4.80
  -8 -17   0   -1.20    4.90
  -8 -17   0    7.50    7.60
   8  17   0   13.50    7.40
   8  17   0    3.50    5.40
   8  17   0    2.90    5.60
   6 -18   0  127.49   22.50
   6 -18   0  111.99   17.20
  -6  18   0  115.19   17.10
  -6  18   0  117.99   15.10
  -6  18   0  112.29   16.70
  -6  18   0  167.98   18.90
   5 -18   0   -0.90    5.00
   5 -18   0    5.80    6.50
   5 -18   0    3.50    5.70
  -5  18   0    4.10    6.30
  -5  18   0    2.30    6.50
  -5  18   0    6.10    6.80
  -5  18   0  -16.70    8.20
   4 -18   0  196.78   19.80
   4 -18   0  138.79   17.90
  -4  18   0  214.68   18.90
  -4  18   0  172.88   15.70
  -4  18   0  157.48   18.70
  -4  18   0  219.18   20.10
  -4  18   0  178.48   16.00
  -4  18   0  187.98   16.80
   3 -18   0  121.09   16.70
  -3  18   0  119.19   14.00
  -3  18   0  115.69   16.20
  -3  18   0  137.09   14.90
  -3  18   0  166.28   19.20
  -3  18   0  151.28   17.00
   2 -18   0  136.49   17.00
  -2  18   0  115.79   11.70
  -2  18   0  133.39   14.20
  -2  18   0  119.69   15.90
  -2  18   0  122.39   15.70
  -2  18   0  127.59   15.70
  -2  18   0   89.49   13.20
   1 -18   0  207.48   20.60
  -1  18   0  205.38   16.90
  -1  18   0  204.38   19.50
  -1  18   0  198.58   18.60
  -1  18   0  206.28   18.30
  -1  18   0  239.58   17.60
  -1  18   0  193.58   23.50
  -1  18   0  193.28   13.80
   0 -18   0    5.40    4.60
   0 -18   0    7.00    5.80
   0 -18   0   18.90    6.20
   0  18   0   23.20    6.50
   0  18   0   14.40    6.80
   0  18   0   16.30    6.60
   0  18   0   23.60    6.80
   0  18   0   16.60    7.90
  -1 -18   0  173.28   11.20
  -1 -18   0  219.98   20.90
   1  18   0  218.18   16.60
   1  18   0  227.58   19.90
   1  18   0  132.69   14.90
   1  18   0  179.08   10.10
   1  18   0  220.58   18.30
   1  18   0  204.88   16.80
  -2 -18   0   -6.50    4.10
  -2 -18   0    3.70    4.10
  -2 -18   0    2.60    3.10
  -2 -18   0    0.20    4.80
   2  18   0   -0.70    5.40
   2  18   0    0.80    4.80
   2  18   0   -6.40    3.80
   2  18   0    2.30    5.10
   2  18   0    2.90    4.70
   2  18   0    7.90    5.20
  -3 -18   0   -3.60    3.20
  -3 -18   0    0.90    4.10
  -3 -18   0   -7.20    4.10
  -3 -18   0   -2.00    4.90
   3  18   0    0.10    4.70
   3  18   0   -7.50    4.00
   3  18   0    3.30    5.70
   3  18   0   -6.70    5.10
  -4 -18   0  -10.50    3.70
  -4 -18   0    3.00    4.30
  -4 -18   0    4.10    4.10
   4  18   0    6.10    5.70
   4  18   0    5.60    5.00
   4  18   0    7.30    7.10
   4  18   0    7.70    6.30
  -5 -18   0  146.39   13.60
  -5 -18   0  117.19   11.90
  -5 -18   0  157.88   18.70
   5  18   0  141.19   19.00
   5  18   0  145.59   16.40
   5  18   0  131.89   14.70
   5  18   0  163.38   17.00
   5  18   0  128.09   14.30
  -6 -18   0    0.60    5.00
  -6 -18   0  -10.80    4.70
  -6 -18   0   -4.10    4.20
  -6 -18   0    0.80    4.40
   6  18   0    7.50    5.00
   6  18   0   -2.20    6.20
   6  18   0    2.40    5.50
   3 -19   0   25.20    8.20
  -3  19   0   37.60    9.20
  -3  19   0   37.30    8.60
  -3  19   0   35.10    9.80
  -3  19   0   56.09   11.60
   2 -19   0    0.60    6.90
  -2  19   0    5.80    6.30
  -2  19   0   -1.40    8.80
  -2  19   0    6.40    6.30
  -2  19   0   14.30    6.70
   1 -19   0   21.70    7.80
   1 -19   0   -4.90    4.70
   1 -19   0    7.30    5.30
  -1  19   0    2.20    8.10
  -1  19   0   -0.10    8.30
  -1  19   0   17.00    7.20
  -1  19   0   13.30    6.80
  -1  19   0    5.10    6.00
   0 -19   0    3.10    5.30
   0 -19   0   27.90    8.10
   0  19   0   49.00   11.70
   0  19   0   28.70    7.70
   0  19   0   19.50    7.50
   0  19   0   16.30    6.70
   0  19   0   21.40    9.10
  -1 -19   0  157.18   18.60
   1  19   0  149.59   16.00
   1  19   0  147.19   15.20
   1  19   0  129.69   18.50
   1  19   0  127.89   15.70
   1  19   0  104.19   16.90
  -2 -19   0   -0.50    4.50
  -2 -19   0    6.10    5.80
  -2 -19   0    1.40    2.60
  -2 -19   0    1.60    5.00
   2  19   0    9.80    6.60
  -3 -19   0  222.08   22.30
  -3 -19   0  219.68   15.30
   3  19   0  239.98   24.30
   3  19   0  257.47   19.20
   3  19   0  261.77   20.40
  -4 -19   0  127.69   12.20
  -4 -19   0  108.39   17.50
   4  19   0  108.99   16.50
   4  19   0  139.79   14.70
   4  19  -1   12.00    6.00
   4  19  -1    1.90    5.40
   3  19  -1   43.00   11.40
   3  19  -1   31.80    8.00
   3  19  -1   28.50    7.50
  -3 -19   1   29.80    9.10
  -3 -19   1   43.10    8.90
   2  19  -1   10.80    5.60
   2  19  -1   19.10    7.00
   2  19  -1   18.50    6.50
  -2 -19   1   13.10    4.20
  -2 -19   1    8.60    3.70
  -2 -19   1   -0.50    5.80
   1  19  -1  175.28   16.30
   1  19  -1  167.08   18.20
   1  19  -1  163.78   17.00
   1  19  -1  197.28   16.10
   1  19  -1  166.28   16.80
  -1 -19   1  183.08   20.00
   0  19  -1  158.08   18.30
   0  19  -1  185.88   17.70
   0  19  -1  152.78   15.90
   0  19  -1  175.58   15.40
   0  19  -1  176.68   17.10
   0 -19   1  160.88   18.40
  -1  19  -1  164.18   20.50
  -1  19  -1  141.89   16.20
  -1  19  -1  154.68   16.70
  -1  19  -1  152.48   18.40
  -1  19  -1  181.78   15.60
   1 -19   1  161.98   19.10
  -2  19  -1  159.58   28.30
  -2  19  -1  153.98   16.30
  -2  19  -1  158.18   17.00
  -2  19  -1  149.88   15.00
   2 -19   1  106.59   17.90
  -3  19  -1   13.10    6.20
  -3  19  -1    7.80    6.60
  -3  19  -1    7.00    6.60
  -3  19  -1    7.00    6.90
   3 -19   1    8.50    6.50
   3 -19   1   -2.90    5.60
   6  18  -1   34.30    7.80
   6  18  -1   59.29   13.30
   6  18  -1   35.90    8.50
  -6 -18   1   16.60    5.90
  -6 -18   1   19.50    6.90
   5  18  -1  193.48   17.60
   5  18  -1  169.98   18.60
   5  18  -1  194.38   16.60
   5  18  -1  200.78   20.80
   5  18  -1  192.68   16.40
  -5 -18   1  203.58   15.80
  -5 -18   1  134.29   12.80
  -5 -18   1  182.98   20.50
   4  18  -1  267.17   22.60
   4  18  -1  235.68   22.10
   4  18  -1  307.87   20.20
   4  18  -1  272.37   19.90
  -4 -18   1  304.37   27.40
  -4 -18   1  249.88   19.40
  -4 -18   1  233.88   16.20
   3  18  -1   85.69   12.50
   3  18  -1  105.59   13.20
   3  18  -1   89.69   12.30
   3  18  -1  105.49   16.70
   3  18  -1   67.69   14.00
  -3 -18   1   74.89    9.60
  -3 -18   1   83.99   17.70
   2  18  -1  325.27   21.90
   2  18  -1  344.07   21.20
   2  18  -1  329.77   21.00
   2  18  -1  316.87   21.30
  -2 -18   1  312.57   25.20
  -2 -18   1  298.47   17.10
   1  18  -1    1.70    5.70
   1  18  -1   -8.70    4.80
   1  18  -1    6.20    5.00
   1  18  -1   -5.70    4.30
   1  18  -1    3.20    4.60
   1  18  -1   -3.30    5.90
   1  18  -1   -3.80    2.20
  -1 -18   1   -0.40    5.90
  -1 -18   1   -8.30    3.20
  -1 -18   1    1.60    2.50
  -1 -18   1   -9.60    4.10
   0  18  -1   96.19   11.70
   0  18  -1  109.19   13.90
   0  18  -1   83.19   11.90
   0  18  -1  104.09   15.00
   0  18  -1  113.79   14.00
   0  18  -1   93.09   12.80
   0  18  -1   86.09    8.80
   0 -18   1  126.69   16.70
   0 -18   1   70.99   11.20
  -1  18  -1   -3.20    4.80
  -1  18  -1   -5.30    5.30
  -1  18  -1   -0.80    4.80
  -1  18  -1   -1.00    3.90
  -1  18  -1   -2.60    4.00
  -1  18  -1   -1.80    4.50
  -1  18  -1   -7.10    5.30
   1 -18   1   -8.30    3.50
   1 -18   1    2.80    6.00
   1 -18   1    0.30    4.50
  -2  18  -1    2.30    5.40
  -2  18  -1   -7.10    3.80
  -2  18  -1   -5.90    5.50
  -2  18  -1   -3.00    5.00
  -2  18  -1   -2.30    5.40
  -2  18  -1   -1.80    4.50
   2 -18   1    2.00    5.40
   2 -18   1   -5.80    4.10
   2 -18   1   -2.40    3.50
  -3  18  -1   -4.90    5.40
  -3  18  -1   -7.80    4.90
  -3  18  -1    6.80    4.80
  -3  18  -1   -5.80    4.60
  -3  18  -1   -3.20    4.80
   3 -18   1   -0.70    3.70
   3 -18   1   -2.40    3.40
   3 -18   1   -8.10    4.50
  -4  18  -1   56.09   11.20
  -4  18  -1   89.69   14.50
  -4  18  -1   85.89   13.50
  -4  18  -1   89.29   15.00
  -4  18  -1   93.79   12.20
  -4  18  -1   79.89   12.30
   4 -18   1   78.89   14.80
   4 -18   1   52.29   12.00
  -5  18  -1    2.30   11.20
  -5  18  -1   11.00    7.00
  -5  18  -1   25.10    7.40
  -5  18  -1   24.90    7.90
   5 -18   1   17.70    7.30
   5 -18   1   19.20    7.70
  -6  18  -1  152.88   16.40
  -6  18  -1  155.78   18.30
  -6  18  -1  168.88   20.70
  -6  18  -1  149.29   17.30
   6 -18   1  149.69   20.50
   6 -18   1  147.89   18.50
   8  17  -1  227.48   18.70
   8  17  -1  243.38   23.10
   8  17  -1  221.68   18.80
  -8 -17   1  241.48   19.00
  -8 -17   1  222.48   22.00
   7  17  -1   93.29   12.50
   7  17  -1   71.79   15.90
   7  17  -1   95.59   13.10
   7  17  -1   76.79   12.40
   7  17  -1   93.19   13.40
  -7 -17   1   57.59   14.50
  -7 -17   1   73.99   12.10
   6  17  -1  321.87   23.60
   6  17  -1  406.96   28.00
   6  17  -1  334.17   22.50
   6  17  -1  332.77   26.20
   6  17  -1  374.66   22.70
  -6 -17   1  329.77   19.20
  -6 -17   1  367.06   22.30
  -6 -17   1  383.86   26.90
   5  17  -1    9.10    6.10
   5  17  -1    6.20    5.20
   5  17  -1    2.40    5.10
   5  17  -1   14.80    6.60
   5  17  -1   10.70    5.70
  -5 -17   1    6.90    6.10
  -5 -17   1    7.50    5.50
  -5 -17   1    4.30    3.60
  -5 -17   1    0.30    3.20
  -5 -17   1    2.90    4.00
   4  17  -1   40.00    8.50
   4  17  -1   60.69   11.70
   4  17  -1   74.29   14.00
   4  17  -1   66.89   11.00
   4  17  -1   73.19   10.60
  -4 -17   1   81.29   12.50
  -4 -17   1   62.69    8.80
  -4 -17   1   71.09   11.00
  -4 -17   1   60.99   14.80
  -4 -17   1   72.09   10.00
   3  17  -1   -3.10    4.60
   3  17  -1    5.50    4.60
   3  17  -1   12.50    7.70
   3  17  -1    4.00    4.50
   3  17  -1   -3.90    4.20
  -3 -17   1    4.00    5.40
  -3 -17   1    6.20    5.30
  -3 -17   1    1.90    4.30
  -3 -17   1   -2.70    3.20
  -3 -17   1    3.30    3.80
   2  17  -1   12.50    5.70
   2  17  -1   14.30    5.30
   2  17  -1    9.30    5.00
   2  17  -1   16.90    6.10
   2  17  -1   19.70    7.30
   2  17  -1   14.30    5.00
  -2 -17   1   17.00    5.50
  -2 -17   1   12.30    6.80
  -2 -17   1   12.10    3.80
  -2 -17   1   22.90    6.90
   1  17  -1    5.50    4.60
   1  17  -1   -1.30    4.80
   1  17  -1   -4.60    2.00
   1  17  -1    1.40    4.20
   1  17  -1   -0.50    4.50
   1  17  -1   -4.30    4.50
  -1 -17   1    0.70    2.40
  -1 -17   1   -3.60    4.60
  -1 -17   1    1.00    3.90
  -1 -17   1    1.10    4.90
   0  17  -1  184.38   14.90
   0  17  -1  204.18   16.50
   0  17  -1  193.08   15.20
   0  17  -1  182.88   16.30
   0  17  -1  155.98   11.10
   0  17  -1  161.48   16.60
   0  17  -1  170.08   18.20
   0 -17   1  145.69   13.50
   0 -17   1  140.19   15.00
   0 -17   1  185.28   18.90
   0 -17   1  164.48   14.50
  -1  17  -1   23.80    7.20
  -1  17  -1   23.70    5.90
  -1  17  -1   11.90    5.90
  -1  17  -1   16.20    7.00
  -1  17  -1   12.80    4.20
  -1  17  -1   24.40    6.80
  -1  17  -1   14.80    7.70
   1 -17   1   11.90    5.00
   1 -17   1   21.30    6.70
   1 -17   1   19.20    6.10
  -2  17  -1  309.87   19.90
  -2  17  -1  264.17   17.60
  -2  17  -1  283.47   18.70
  -2  17  -1  289.37   22.50
  -2  17  -1  308.37   25.00
  -2  17  -1  352.96   23.00
  -2  17  -1  322.57   21.50
   2 -17   1  289.77   19.20
   2 -17   1  287.77   21.00
   2 -17   1  334.17   23.40
  -3  17  -1  334.97   20.40
  -3  17  -1  296.87   23.10
  -3  17  -1  279.07   20.60
  -3  17  -1  325.97   22.20
  -3  17  -1  372.16   24.80
  -3  17  -1  334.27   21.30
   3 -17   1  360.06   24.50
   3 -17   1  349.47   22.70
   3 -17   1  308.87   19.90
  -4  17  -1   95.59   12.90
  -4  17  -1  122.99   15.80
  -4  17  -1  102.59   11.80
  -4  17  -1  156.48   14.70
  -4  17  -1  138.59   16.70
  -4  17  -1  117.79   15.20
   4 -17   1  109.09   12.40
   4 -17   1  120.39   15.70
   4 -17   1  139.39   16.10
   4 -17   1  100.49   14.20
  -5  17  -1  430.66   27.00
  -5  17  -1  409.26   32.80
  -5  17  -1  434.56   25.60
  -5  17  -1  381.76   25.00
  -5  17  -1  446.56   29.50
  -5  17  -1  404.46   27.80
   5 -17   1  418.36   27.00
   5 -17   1  394.06   27.90
  -6  17  -1    3.00    6.10
  -6  17  -1    7.60    6.20
  -6  17  -1   -4.60    5.70
  -6  17  -1   -1.10    6.30
  -6  17  -1   13.80    6.50
  -6  17  -1    6.40    5.60
   6 -17   1    8.90    6.70
   6 -17   1    0.80    5.40
   6 -17   1   -6.60    3.90
   6 -17   1   -3.80    3.80
  -7  17  -1  116.29   16.20
  -7  17  -1  103.19   24.00
  -7  17  -1  113.59   15.30
  -7  17  -1   92.59   17.90
   7 -17   1  107.49   15.90
   7 -17   1  110.19   15.30
   9  16  -1    3.10    5.90
   9  16  -1    9.80    7.60
   9  16  -1   10.60    5.90
  -9 -16   1    5.30    4.20
  -9 -16   1   11.10    7.90
  -9 -16   1    6.80    8.00
  -9 -16   1   -0.70    4.30
  -9 -16   1   -8.50    4.00
   8  16  -1   48.20   10.10
   8  16  -1   26.40    7.10
   8  16  -1   31.80   10.00
   8  16  -1   38.20    9.30
  -8 -16   1   15.00    6.50
  -8 -16   1   32.70    6.60
  -8 -16   1   32.70    9.40
  -8 -16   1   20.30    4.20
   7  16  -1    7.30    5.00
   7  16  -1    8.60    5.30
   7  16  -1    0.20    4.90
   7  16  -1    7.70    5.90
   7  16  -1    3.70    6.00
  -7 -16   1    6.60    2.70
  -7 -16   1    4.30    3.10
  -7 -16   1    9.20    2.70
  -7 -16   1    0.80    4.40
  -7 -16   1    9.50    6.80
  -7 -16   1    4.00    5.20
   6  16  -1   21.70    6.80
   6  16  -1   10.10    5.50
   6  16  -1   18.40    7.90
   6  16  -1   19.10    7.20
   6  16  -1   24.00    6.40
  -6 -16   1   11.20    5.70
  -6 -16   1   15.40    5.20
  -6 -16   1   27.20    6.70
  -6 -16   1   17.70    5.10
  -6 -16   1   31.10    4.60
  -6 -16   1   15.20    3.80
  -6 -16   1   30.10    9.20
   5  16  -1    7.60    5.40
   5  16  -1    7.20    5.10
   5  16  -1    3.90    4.50
   5  16  -1    2.70    4.70
   5  16  -1    4.30    6.30
  -5 -16   1    0.60    4.30
  -5 -16   1   -0.30    4.80
  -5 -16   1   -0.70    6.00
  -5 -16   1   -0.70    3.90
  -5 -16   1    1.30    2.20
  -5 -16   1    2.80    3.10
   4  16  -1  376.96   21.60
   4  16  -1  308.07   22.00
   4  16  -1  356.36   22.90
   4  16  -1  338.47   25.30
   4  16  -1  336.17   21.40
  -4 -16   1  353.36   18.60
  -4 -16   1  371.36   24.40
  -4 -16   1  328.77   20.80
  -4 -16   1  380.06   26.00
  -4 -16   1  372.36   20.30
   3  16  -1   70.09   13.70
   3  16  -1   98.19   12.50
   3  16  -1  101.69   18.30
   3  16  -1   96.99   14.40
  -3 -16   1  103.99   15.00
  -3 -16   1   96.09   13.30
  -3 -16   1  110.29   10.20
  -3 -16   1   74.49    9.30
  -3 -16   1   91.59   10.60
   2  16  -1  620.54   29.50
   2  16  -1  560.84   31.70
   2  16  -1  587.44   29.00
   2  16  -1  608.54   29.50
   2  16  -1  621.04   31.30
   2  16  -1  535.35   30.30
  -2 -16   1  564.84   27.90
  -2 -16   1  565.64   32.10
  -2 -16   1  545.15   28.90
  -2 -16   1  593.94   26.60
  -2 -16   1  620.04   34.30
   1  16  -1  726.43   37.10
   1  16  -1  718.73   33.80
   1  16  -1  660.53   34.70
   1  16  -1  686.93   29.20
   1  16  -1  722.23   33.40
   1  16  -1  713.83   34.40
   1  16  -1  748.33   35.80
   1  16  -1  734.53   33.70
  -1 -16   1  731.13   36.90
  -1 -16   1  684.63   33.30
  -1 -16   1  626.64   32.40
  -1 -16   1  789.32   39.10
  -1 -16   1  724.43   30.20
   0  16  -1   57.99   11.60
   0  16  -1   53.99    7.10
   0  16  -1   52.39    9.20
   0  16  -1   49.40    9.10
   0  16  -1   61.09   10.10
   0  16  -1   52.09   10.90
   0  16  -1   37.60    7.90
   0  16  -1   73.69   10.90
   0 -16   1   48.60   10.50
   0 -16   1   54.29    9.20
   0 -16   1   68.19   13.70
  -1  16  -1  377.26   23.40
  -1  16  -1  460.25   23.60
  -1  16  -1  440.36   23.10
  -1  16  -1  386.76   20.50
  -1  16  -1  408.16   22.20
  -1  16  -1  401.76   25.80
  -1  16  -1  421.56   24.80
  -1  16  -1  452.55   25.50
   1 -16   1  438.36   27.10
   1 -16   1  418.36   25.30
   1 -16   1  369.66   22.10
  -2  16  -1    4.70    5.30
  -2  16  -1    7.40    4.10
  -2  16  -1    4.80    5.30
  -2  16  -1    5.80    5.00
  -2  16  -1   -1.40    4.50
  -2  16  -1    1.80    4.20
   2 -16   1   -3.00    4.70
   2 -16   1   -1.50    5.00
   2 -16   1   -0.80    3.60
  -3  16  -1   91.89   12.80
  -3  16  -1  102.79   14.00
  -3  16  -1   89.29   12.20
  -3  16  -1   99.99   11.20
  -3  16  -1  106.49   14.20
   3 -16   1   87.49   13.80
   3 -16   1  100.79   13.40
   3 -16   1   93.99   10.50
   3 -16   1   96.59   14.40
  -4  16  -1   71.79   11.60
  -4  16  -1   94.99   14.30
  -4  16  -1   90.89   11.40
  -4  16  -1   88.59   11.40
  -4  16  -1   86.79   12.50
  -4  16  -1   79.69   13.00
   4 -16   1   91.29   14.10
   4 -16   1   74.49   13.40
   4 -16   1  101.49   13.00
   4 -16   1   80.49   10.70
  -5  16  -1   51.39   12.00
  -5  16  -1   48.30   11.40
  -5  16  -1   63.19   13.80
  -5  16  -1   76.09   11.80
  -5  16  -1   70.99   14.60
  -5  16  -1   49.60   10.70
   5 -16   1   35.40    8.90
   5 -16   1   69.29   10.80
   5 -16   1   63.69   12.80
   5 -16   1   54.19   11.70
  -6  16  -1    1.70    4.10
  -6  16  -1   -1.40    4.30
  -6  16  -1    4.60    5.40
  -6  16  -1    2.10    5.30
  -6  16  -1   -0.50    5.10
  -6  16  -1    9.90    5.90
   6 -16   1   -1.60    5.00
   6 -16   1    2.50    6.20
   6 -16   1    1.90    5.20
   6 -16   1   -1.00    4.60
  -7  16  -1  207.48   18.70
  -7  16  -1  202.88   20.00
  -7  16  -1  214.38   17.30
  -7  16  -1  212.88   16.90
  -7  16  -1  179.48   16.70
  -7  16  -1  201.38   20.60
   7 -16   1  133.99   16.80
   7 -16   1  169.28   18.70
   7 -16   1  231.68   18.70
  -8  16  -1   70.19   13.20
  -8  16  -1   34.10   10.90
  -8  16  -1   48.50   10.60
  -8  16  -1   52.39   11.70
  -8  16  -1   68.39   12.70
   8 -16   1   65.49   13.00
   8 -16   1   45.70   15.00
  -9  16  -1  227.48   22.30
  -9  16  -1  204.98   20.20
  -9  16  -1  226.78   19.40
  -9  16  -1  258.27   24.00
   9 -16   1  195.38   20.30
   9 -16   1  210.68   18.60
  10  15  -1   93.89   13.50
  10  15  -1   50.39    8.60
  10  15  -1   61.89   12.30
  10  15  -1   73.09   12.30
  10  15  -1   77.49   15.10
 -10 -15   1   65.49    8.90
 -10 -15   1   66.19   13.20
 -10 -15   1   79.19   16.60
 -10 -15   1   62.89    9.10
 -10 -15   1   55.89   13.00
   9  15  -1   -4.90    5.50
   9  15  -1    3.60    4.90
   9  15  -1    2.70    5.20
   9  15  -1    3.40    7.10
   9  15  -1   -4.30    2.40
   9  15  -1    1.00    5.40
  -9 -15   1   -7.40    2.40
  -9 -15   1   -3.40    3.60
  -9 -15   1    5.30    6.20
  -9 -15   1   -0.20    3.40
  -9 -15   1    0.50    4.40
  -9 -15   1    5.80    4.60
   8  15  -1  236.08   13.20
   8  15  -1  225.28   20.50
   8  15  -1  295.97   24.40
   8  15  -1  277.47   20.00
   8  15  -1  257.97   18.70
   8  15  -1  301.77   20.90
  -8 -15   1  265.77   19.60
  -8 -15   1  276.07   22.90
  -8 -15   1  274.17   14.50
  -8 -15   1  287.07   22.00
  -8 -15   1  268.97   14.30
   7  15  -1  167.68   16.90
   7  15  -1  197.98   15.90
   7  15  -1  186.58   15.70
   7  15  -1  165.88    9.10
   7  15  -1  214.88   20.20
   7  15  -1  207.28   17.20
  -7 -15   1  186.28   10.10
  -7 -15   1  173.28   18.00
  -7 -15   1  195.88   11.20
  -7 -15   1  188.58   16.00
  -7 -15   1  193.78   18.40
   6  15  -1  337.17   23.50
   6  15  -1  382.06   22.60
   6  15  -1  384.56   26.90
   6  15  -1  383.76   23.70
   6  15  -1  391.76   22.20
  -6 -15   1  384.16   26.10
  -6 -15   1  363.76   21.80
  -6 -15   1  377.76   16.90
  -6 -15   1  385.16   25.90
  -6 -15   1  363.26   17.50
  -6 -15   1  356.76   17.00
   5  15  -1  475.15   26.40
   5  15  -1  513.25   27.90
   5  15  -1  440.56   27.60
   5  15  -1  541.55   36.30
   5  15  -1  491.95   30.80
  -5 -15   1  508.25   30.20
  -5 -15   1  524.35   26.00
  -5 -15   1  504.15   31.60
  -5 -15   1  489.95   32.30
  -5 -15   1  478.05   24.90
  -5 -15   1  509.35   22.90
  -5 -15   1  500.65   20.70
   4  15  -1  161.48   16.50
   4  15  -1  148.89   14.40
   4  15  -1  127.49   20.60
   4  15  -1  160.28   13.40
   4  15  -1  130.29   11.90
   4  15  -1  132.69   12.40
  -4 -15   1  134.59   14.60
  -4 -15   1  154.68   12.10
  -4 -15   1  152.88   16.10
  -4 -15   1  140.39    8.20
  -4 -15   1  135.19   12.50
  -4 -15   1  133.89   10.20
   3  15  -1  401.76   21.00
   3  15  -1  367.96   20.10
   3  15  -1  397.26   21.40
   3  15  -1  334.47   22.10
  -3 -15   1  391.66   25.50
  -3 -15   1  372.96   19.80
  -3 -15   1  378.46   19.40
  -3 -15   1  374.46   15.40
  -3 -15   1  386.76   24.50
  -3 -15   1  375.56   15.70
  -3 -15   1  359.46   21.20
   2  15  -1    0.70    3.50
   2  15  -1   -0.90    4.00
   2  15  -1   -1.50    4.40
   2  15  -1   -0.40    3.80
   2  15  -1    5.90    4.00
   2  15  -1    0.50    1.70
   2  15  -1    0.10    4.20
   2  15  -1   -0.40    3.50
  -2 -15   1    0.90    4.90
  -2 -15   1   -2.80    3.40
  -2 -15   1   -3.10    3.20
  -2 -15   1   -0.60    2.70
  -2 -15   1    0.50    2.60
  -2 -15   1   -0.40    1.70
  -2 -15   1    3.30    4.50
   1  15  -1  115.79   11.20
   1  15  -1  102.19    7.50
   1  15  -1  117.49   12.30
   1  15  -1  113.29   12.90
   1  15  -1  103.69   10.40
   1  15  -1  112.59   11.20
   1  15  -1   88.49    9.70
   1  15  -1   96.99   11.10
  -1 -15   1  105.09    9.80
  -1 -15   1  109.29    8.40
  -1 -15   1  119.19   14.40
  -1 -15   1  119.89   12.80
  -1 -15   1  106.89   10.70
  -1 -15   1   94.09    9.90
   0  15  -1   98.59   11.60
   0  15  -1   96.39    9.90
   0  15  -1   92.89   11.50
   0  15  -1  117.19   11.10
   0  15  -1   81.89    9.90
   0  15  -1  107.49   10.80
   0  15  -1  109.09   13.50
   0 -15   1   94.99    9.80
   0 -15   1  103.79    8.40
   0 -15   1  112.99   12.10
   0 -15   1  118.39   14.60
   0 -15   1   94.79   10.30
   0 -15   1  100.49   10.40
  -1  15  -1  123.79   12.60
  -1  15  -1  105.09   11.30
  -1  15  -1  132.39   11.60
  -1  15  -1  113.59    9.60
  -1  15  -1  122.29   11.30
  -1  15  -1  104.89   12.70
  -1  15  -1  121.09   10.30
  -1  15  -1  142.79   13.50
   1 -15   1  121.49   13.70
   1 -15   1  114.09   10.40
   1 -15   1  121.99   12.80
   1 -15   1  117.79    7.20
   1 -15   1  123.29   11.20
  -2  15  -1    1.50    4.30
  -2  15  -1   -0.80    3.50
  -2  15  -1   -1.70    4.00
  -2  15  -1    0.60    4.90
  -2  15  -1    0.00    3.40
  -2  15  -1    3.10    4.20
  -2  15  -1   -1.60    3.30
   2 -15   1    0.00    3.50
   2 -15   1   -5.30    4.10
   2 -15   1   -1.20    2.70
   2 -15   1   -2.70    4.00
   2 -15   1    3.80    5.00
  -3  15  -1  471.95   26.30
  -3  15  -1  414.06   25.40
  -3  15  -1  441.56   27.40
  -3  15  -1  519.55   25.30
  -3  15  -1  526.95   25.40
  -3  15  -1  492.85   23.80
   3 -15   1  544.15   35.50
   3 -15   1  467.15   27.80
   3 -15   1  475.05   27.90
   3 -15   1  432.16   24.10
   3 -15   1  456.85   27.00
  -4  15  -1   96.29   11.00
  -4  15  -1   98.59   12.20
  -4  15  -1   97.69   14.00
  -4  15  -1  103.49    9.90
  -4  15  -1   77.79   13.40
  -4  15  -1   83.09   12.50
  -4  15  -1   76.99   10.70
   4 -15   1   98.89   13.60
   4 -15   1   70.49   12.90
   4 -15   1   82.79   10.00
   4 -15   1   86.09   12.70
  -5  15  -1  444.96   26.40
  -5  15  -1  469.15   25.30
  -5  15  -1  491.25   28.00
  -5  15  -1  552.34   30.80
  -5  15  -1  492.45   29.50
   5 -15   1  475.85   19.30
   5 -15   1  445.86   24.80
   5 -15   1  486.65   29.20
   5 -15   1  455.55   27.90
   5 -15   1  486.15   27.90
   5 -15   1  483.95   19.10
  -6  15  -1  349.47   21.50
  -6  15  -1  415.16   23.20
  -6  15  -1  319.47   22.10
  -6  15  -1  390.96   24.40
  -6  15  -1  399.76   26.30
  -6  15  -1  376.46   25.90
   6 -15   1  367.46   21.80
   6 -15   1  355.96   30.30
   6 -15   1  368.36   15.80
   6 -15   1  380.16   16.20
   6 -15   1  393.66   24.30
   6 -15   1  369.26   25.30
  -7  15  -1   90.19   14.10
  -7  15  -1   71.19   12.70
  -7  15  -1   79.49   11.70
  -7  15  -1   87.89   11.20
  -7  15  -1   96.09   12.40
  -7  15  -1   69.19   15.00
   7 -15   1   70.59    6.20
   7 -15   1   87.19   13.90
   7 -15   1   83.99    7.50
   7 -15   1   87.29   11.40
   7 -15   1   66.69    6.30
   7 -15   1   91.29   13.30
   7 -15   1   96.09   13.90
  -8  15  -1  287.07   20.20
  -8  15  -1  278.67   20.40
  -8  15  -1  266.67   21.00
  -8  15  -1  282.27   23.90
  -8  15  -1  250.57   22.00
  -8  15  -1  259.17   18.80
   8 -15   1  263.97   22.60
   8 -15   1  257.77   19.90
   8 -15   1  251.57   12.80
   8 -15   1  260.17   21.70
  -9  15  -1    8.10    6.40
  -9  15  -1   17.20   11.90
  -9  15  -1    7.10    6.00
  -9  15  -1   12.40    6.00
  -9  15  -1   13.70    6.00
   9 -15   1    7.60    3.40
   9 -15   1   -0.60    4.50
   9 -15   1   -0.60    5.30
   9 -15   1    1.70    3.90
   9 -15   1   10.20    7.40
 -10  15  -1   27.00    8.10
 -10  15  -1   30.30    9.60
 -10  15  -1   21.10    8.30
 -10  15  -1   15.40    7.90
  10 -15   1   17.70    6.30
  10 -15   1    1.60    5.40
  10 -15   1    8.70    7.00
  11  14  -1  207.88   16.90
  11  14  -1  193.98   21.20
  11  14  -1  192.38   18.60
  11  14  -1  150.88   13.60
 -11 -14   1  170.18   17.10
 -11 -14   1  202.58   21.90
 -11 -14   1  200.68   18.20
  10  14  -1  234.18   21.50
  10  14  -1  260.77   23.70
  10  14  -1  269.67   20.00
  10  14  -1  233.38   19.80
  10  14  -1  231.58   15.50
  10  14  -1  278.17   18.80
 -10 -14   1  251.57   20.70
 -10 -14   1  267.57   15.80
 -10 -14   1  257.67   23.40
 -10 -14   1  245.58   19.80
 -10 -14   1  237.98   14.60
   9  14  -1  269.27   15.90
   9  14  -1  268.17   20.20
   9  14  -1  277.47   24.00
   9  14  -1  266.47   22.80
   9  14  -1  313.37   20.10
   9  14  -1  335.97   21.70
  -9 -14   1  299.07   16.20
  -9 -14   1  307.87   22.40
  -9 -14   1  316.07   16.80
  -9 -14   1  293.57   23.80
  -9 -14   1  327.37   21.60
   8  14  -1   22.50    5.00
   8  14  -1   28.70    7.30
   8  14  -1   26.90    7.50
   8  14  -1   27.30    7.20
   8  14  -1   17.80    6.40
   8  14  -1   28.50    8.90
  -8 -14   1   34.30    7.70
  -8 -14   1   34.90    7.10
  -8 -14   1   31.10    8.70
  -8 -14   1   33.00    6.80
  -8 -14   1   35.20    5.90
  -8 -14   1   20.30    6.00
   7  14  -1  276.57   19.90
   7  14  -1  234.58   13.10
   7  14  -1  317.37   23.90
   7  14  -1  261.47   20.30
   7  14  -1  283.17   18.40
   7  14  -1  286.37   18.80
  -7 -14   1  288.17   14.60
  -7 -14   1  294.87   19.00
  -7 -14   1  290.47   21.40
  -7 -14   1  267.77   12.90
  -7 -14   1  292.17   22.10
  -7 -14   1  287.87   19.00
  -7 -14   1  278.57   14.70
   6  14  -1    9.30    5.10
   6  14  -1   12.20    6.40
   6  14  -1    5.00    1.90
   6  14  -1    8.80    5.40
   6  14  -1   11.10    4.60
   6  14  -1   16.50    5.60
  -6 -14   1   13.40    3.30
  -6 -14   1   12.20    4.90
  -6 -14   1    8.00    4.80
  -6 -14   1    6.60    2.60
  -6 -14   1    4.10    5.80
  -6 -14   1    5.20    4.10
   5  14  -1    1.20    4.70
   5  14  -1   -0.30    4.20
   5  14  -1   -2.40    3.30
   5  14  -1   -1.60    5.30
   5  14  -1    0.10    4.30
   5  14  -1    1.30    3.80
  -5 -14   1    6.00    3.60
  -5 -14   1    1.80    5.00
  -5 -14   1   -0.80    2.20
  -5 -14   1    1.70    2.80
  -5 -14   1   -0.80    4.00
  -5 -14   1    2.10    2.40
   4  14  -1   -2.50    2.80
   4  14  -1   -1.70    4.00
   4  14  -1    4.80   10.50
   4  14  -1    0.70    3.90
   4  14  -1   -2.30    3.30
   4  14  -1   -0.30    3.50
  -4 -14   1    0.50    2.20
  -4 -14   1    3.50    3.50
  -4 -14   1    4.00    3.20
  -4 -14   1   -0.20    4.10
  -4 -14   1    1.80    2.00
  -4 -14   1   -0.30    2.50
  -4 -14   1    0.70    3.70
   3  14  -1  111.69   10.50
   3  14  -1  114.49   10.00
   3  14  -1   95.19   10.70
   3  14  -1  123.29   17.60
   3  14  -1  105.29    9.70
   3  14  -1  122.89   12.20
  -3 -14   1  110.69   10.60
  -3 -14   1  110.59   12.90
  -3 -14   1  109.49    7.20
  -3 -14   1   99.09    8.80
  -3 -14   1  103.49   13.40
  -3 -14   1  112.29   10.00
   2  14  -1    8.70    5.10
   2  14  -1    4.00    1.90
   2  14  -1   -1.40    3.10
   2  14  -1    7.90    4.30
   2  14  -1    1.70    4.80
   2  14  -1    9.40    4.10
   2  14  -1    3.30    3.50
   2  14  -1   -0.10    3.30
  -2 -14   1    5.20    2.40
  -2 -14   1    7.80    2.00
  -2 -14   1    1.00    2.70
  -2 -14   1    7.10    2.90
  -2 -14   1    4.20    3.40
  -2 -14   1    4.00    4.30
  -2 -14   1    4.90    4.90
   1  14  -1  776.02   34.20
   1  14  -1  797.02   34.10
   1  14  -1  681.53   35.50
   1  14  -1  823.22   37.80
   1  14  -1  778.82   35.20
   1  14  -1  792.42   34.80
   1  14  -1  727.53   31.10
  -1 -14   1  828.22   37.70
  -1 -14   1  755.32   29.30
  -1 -14   1  744.33   31.80
  -1 -14   1  763.72   34.40
  -1 -14   1  775.72   34.10
  -1 -14   1  790.92   49.60
  -1 -14   1  780.22   29.70
   0  14  -1  165.68   14.00
   0  14  -1  187.28   13.10
   0  14  -1  170.28   13.80
   0  14  -1  170.38   15.00
   0  14  -1  193.18   12.50
   0  14  -1  183.18   13.30
   0  14  -1  184.88   11.10
   0 -14   1  195.48   15.10
   0 -14   1  175.78   10.10
   0 -14   1  182.68   16.60
   0 -14   1  179.38    8.80
   0 -14   1  179.98   12.60
   0 -14   1  191.58   13.00
   0 -14   1  173.18    8.20
  -1  14  -1  641.24   33.30
  -1  14  -1  723.43   34.30
  -1  14  -1  715.63   35.40
  -1  14  -1  725.03   43.40
  -1  14  -1  696.93   32.30
  -1  14  -1  704.53   32.20
  -1  14  -1  755.02   31.80
   1 -14   1  733.53   27.40
   1 -14   1  696.03   32.80
   1 -14   1  681.53   31.90
   1 -14   1  748.73   36.20
   1 -14   1  715.93   28.00
   1 -14   1  690.13   34.60
   1 -14   1  694.63   26.90
  -2  14  -1  611.64   29.30
  -2  14  -1  677.03   31.80
  -2  14  -1  651.83   32.20
  -2  14  -1  582.84   30.60
  -2  14  -1  611.84   29.40
  -2  14  -1  613.64   31.60
  -2  14  -1  610.24   28.50
  -2  14  -1  610.04   32.20
   2 -14   1  633.24   29.30
   2 -14   1  648.04   32.90
   2 -14   1  626.34   24.60
   2 -14   1  634.24   32.10
   2 -14   1  675.23   33.50
   2 -14   1  619.64   24.20
  -3  14  -1  136.19   14.20
  -3  14  -1  117.69   10.40
  -3  14  -1  112.89   11.30
  -3  14  -1  120.29   11.30
  -3  14  -1  121.79   13.30
  -3  14  -1  126.09   12.90
  -3  14  -1  141.59   11.70
   3 -14   1  105.29   10.40
   3 -14   1  125.59   12.70
   3 -14   1  129.79    6.90
   3 -14   1  125.29   13.90
   3 -14   1  155.28   18.20
   3 -14   1  127.89    7.20
  -4  14  -1  401.96   23.30
  -4  14  -1  378.06   21.50
  -4  14  -1  425.96   27.70
  -4  14  -1  422.16   20.80
  -4  14  -1  399.86   25.60
  -4  14  -1  402.46   23.10
   4 -14   1  373.56   24.30
   4 -14   1  413.26   24.60
   4 -14   1  380.46   21.20
   4 -14   1  404.26   21.80
   4 -14   1  388.16   23.70
   4 -14   1  390.66   22.60
   4 -14   1  383.96   16.50
   4 -14   1  391.46   16.90
  -5  14  -1   47.20   10.10
  -5  14  -1   29.40    5.80
  -5  14  -1   52.19    9.30
  -5  14  -1   48.20   11.20
  -5  14  -1   29.30    6.20
  -5  14  -1   34.30    7.50
  -5  14  -1   40.20    7.30
   5 -14   1   32.90    4.70
   5 -14   1   45.00    8.70
   5 -14   1   21.90    6.20
   5 -14   1   34.10    7.80
   5 -14   1   44.70    5.30
   5 -14   1   45.80   10.80
  -6  14  -1    4.90    5.30
  -6  14  -1   10.10    5.40
  -6  14  -1   12.10    6.40
  -6  14  -1    4.70    5.40
  -6  14  -1   14.50    5.70
  -6  14  -1   11.20    4.80
   6 -14   1    9.80    6.30
   6 -14   1    5.50    5.00
   6 -14   1    8.10    7.90
   6 -14   1   12.80    3.10
   6 -14   1    3.50    2.00
  -7  14  -1   25.00    7.30
  -7  14  -1   10.20    4.50
  -7  14  -1   14.30    6.10
  -7  14  -1   26.90    7.00
  -7  14  -1   11.40    6.30
  -7  14  -1   26.10    7.30
   7 -14   1   25.20    8.10
   7 -14   1   21.20    6.80
   7 -14   1   28.20    5.40
   7 -14   1   18.60    3.40
   7 -14   1   20.60    4.10
   7 -14   1   18.20    6.70
  -8  14  -1  111.59   12.60
  -8  14  -1  122.39   14.10
  -8  14  -1   94.69   12.50
  -8  14  -1  157.38   17.70
  -8  14  -1  150.38   15.00
  -8  14  -1  119.39   15.90
   8 -14   1  113.79    9.50
   8 -14   1  102.99   14.40
   8 -14   1  114.29    9.20
   8 -14   1  129.79   16.00
   8 -14   1  114.59   13.70
  -9  14  -1    4.40    4.80
  -9  14  -1    3.90    5.90
  -9  14  -1    3.50    6.10
  -9  14  -1   10.10    5.90
  -9  14  -1   -6.50    4.80
  -9  14  -1   -3.00    5.20
   9 -14   1    3.30    3.50
   9 -14   1   -4.50    5.70
   9 -14   1   -4.70    2.90
   9 -14   1   -1.30    2.90
   9 -14   1    1.00    4.90
   9 -14   1    4.50    3.90
   9 -14   1   -3.80    5.00
 -10  14  -1  346.17   21.80
 -10  14  -1  323.47   25.30
 -10  14  -1  343.17   27.10
 -10  14  -1  373.86   24.30
  10 -14   1  346.17   25.10
  10 -14   1  330.57   17.30
  10 -14   1  343.87   17.80
  10 -14   1  366.66   22.20
  10 -14   1  298.57   18.40
  10 -14   1  355.76   25.90
 -11  14  -1   80.19   16.60
 -11  14  -1   71.49   15.80
 -11  14  -1   84.19   14.60
 -11  14  -1   81.89   14.90
  11 -14   1   87.89   17.00
  11 -14   1   75.39   14.70
  11 -14   1   70.29   12.00
  11 -14   1   54.69    9.20
  11 -14   1   43.20    7.70
  12  13  -1    7.70    7.10
  12  13  -1    7.60    6.30
 -12 -13   1    2.50    4.70
 -12 -13   1    1.40    4.80
 -12 -13   1   15.10    9.10
 -12 -13   1   -7.90    3.70
  11  13  -1  111.19   11.40
  11  13  -1  103.19   16.40
  11  13  -1   80.89   14.80
  11  13  -1   94.29   13.90
  11  13  -1  100.49   14.90
  11  13  -1   85.59   11.90
 -11 -13   1   77.19   15.70
 -11 -13   1   92.29   14.00
 -11 -13   1  103.09   13.90
 -11 -13   1  103.59   17.30
  10  13  -1    8.40    6.00
  10  13  -1   16.80    6.20
  10  13  -1   12.10    6.10
  10  13  -1   30.50    8.90
  10  13  -1   12.50    4.10
  10  13  -1   18.10    6.20
 -10 -13   1   18.10    6.10
 -10 -13   1   16.30    7.20
 -10 -13   1   15.40    5.10
 -10 -13   1   22.00    6.40
 -10 -13   1   20.10    4.70
 -10 -13   1    8.50    5.60
   9  13  -1    7.20    3.10
   9  13  -1   10.10    6.70
   9  13  -1    9.80    5.40
   9  13  -1   11.70    5.20
   9  13  -1    5.10    5.10
   9  13  -1    7.00    5.20
  -9 -13   1   20.40    8.60
  -9 -13   1    3.70    4.30
  -9 -13   1    6.00    4.60
  -9 -13   1    8.70    5.50
  -9 -13   1    9.90    4.40
   8  13  -1    6.60    2.80
   8  13  -1    5.60    6.00
   8  13  -1    7.90    4.80
   8  13  -1    2.00    4.30
   8  13  -1   10.30    5.70
   8  13  -1    5.40    5.20
  -8 -13   1   10.80    5.00
  -8 -13   1    6.10    4.80
  -8 -13   1    7.50    3.30
  -8 -13   1    1.30    3.70
  -8 -13   1    6.40    5.30
  -8 -13   1    0.20    3.40
   7  13  -1  503.85   29.80
   7  13  -1  526.05   32.10
   7  13  -1  521.65   31.70
   7  13  -1  548.05   26.70
   7  13  -1  521.55   28.40
   7  13  -1  506.95   23.00
   7  13  -1  524.15   27.80
  -7 -13   1  580.54   33.20
  -7 -13   1  517.95   23.60
  -7 -13   1  508.45   27.50
  -7 -13   1  512.65   21.50
  -7 -13   1  505.15   29.30
  -7 -13   1  534.35   31.30
  -7 -13   1  533.15   23.40
   6  13  -1   40.40    8.00
   6  13  -1   23.50    7.80
   6  13  -1   29.80    6.90
   6  13  -1   23.70    6.60
   6  13  -1   40.10    4.50
   6  13  -1   43.90    8.10
   6  13  -1   37.00    7.00
  -6 -13   1   40.30    9.60
  -6 -13   1   35.00    8.00
  -6 -13   1   47.30   10.10
  -6 -13   1   37.10    8.40
  -6 -13   1   32.20   13.60
  -6 -13   1   34.60    6.00
  -6 -13   1   30.20    4.50
   5  13  -1  980.40   51.59
   5  13  -1  855.41   40.90
   5  13  -1 1001.30   46.40
   5  13  -1  992.90   40.70
   5  13  -1  892.61   43.50
  -5 -13   1  913.51   44.40
  -5 -13   1  895.61   37.20
  -5 -13   1  946.21   40.80
  -5 -13   1  928.61   36.80
  -5 -13   1  937.71   46.20
  -5 -13   1  926.71   37.30
   4  13  -1  728.43   33.00
   4  13  -1  693.93   30.80
   4  13  -1  660.33   31.70
   4  13  -1  625.24   33.00
   4  13  -1  644.14   30.70
   4  13  -1  679.43   35.60
  -4 -13   1  660.23   28.60
  -4 -13   1  683.73   27.30
  -4 -13   1  656.03   34.20
  -4 -13   1  687.63   30.70
  -4 -13   1  630.04   34.00
  -4 -13   1  719.03   29.10
   3  13  -1  443.06   21.10
   3  13  -1  421.86   23.60
   3  13  -1  397.26   21.10
   3  13  -1  423.06   21.50
   3  13  -1  425.26   24.60
   3  13  -1  462.35   24.20
  -3 -13   1  431.06   20.20
  -3 -13   1  427.86   18.50
  -3 -13   1  417.46   24.50
  -3 -13   1  436.76   21.00
  -3 -13   1  391.16   24.00
  -3 -13   1  403.76   24.90
  -3 -13   1  428.16   18.00
   2  13  -1  706.63   35.10
   2  13  -1  735.83   33.00
   2  13  -1  737.03   33.70
   2  13  -1  682.73   29.20
   2  13  -1  799.52   35.10
   2  13  -1  781.92   33.40
   2  13  -1  768.92   36.30
   2  13  -1  750.62   33.40
  -2 -13   1  818.72   37.90
  -2 -13   1  794.62   30.10
  -2 -13   1  781.02   32.20
  -2 -13   1  746.53   33.70
  -2 -13   1  754.62   36.40
  -2 -13   1  778.02   29.50
  -2 -13   1  733.73   33.90
  -2 -13   1  757.72   32.50
   1  13  -1  160.28   12.00
   1  13  -1  141.19   11.20
   1  13  -1  145.39    9.00
   1  13  -1  168.58   14.30
   1  13  -1  175.78   12.50
   1  13  -1  170.18   11.40
   1  13  -1  145.99   12.30
   1  13  -1  144.79   12.40
  -1 -13   1  160.48   11.30
  -1 -13   1  173.08   10.30
  -1 -13   1  167.98   11.80
  -1 -13   1  155.08   11.50
  -1 -13   1  158.68    8.70
  -1 -13   1  158.58    8.00
  -1 -13   1  176.48   15.20
  -1 -13   1  160.68   13.80
   0  13  -1  331.67   19.00
   0  13  -1  326.37   20.30
   0  13  -1  349.57   17.90
   0  13  -1  322.67   18.00
   0  13  -1  327.57   17.30
   0  13  -1  309.47   18.90
   0  13  -1  307.77   16.00
   0  13  -1  330.27   19.00
   0 -13   1  331.87   21.30
   0 -13   1  315.37   17.70
   0 -13   1  340.37   15.40
   0 -13   1  345.97   20.40
   0 -13   1  337.77   14.40
   0 -13   1  326.67   18.00
   0 -13   1  328.97   17.80
   0 -13   1  325.47   13.80
  -1  13  -1   19.20    4.60
  -1  13  -1    9.10    4.90
  -1  13  -1   10.70    4.00
  -1  13  -1   14.70    4.00
  -1  13  -1   19.30    4.90
  -1  13  -1   15.30    4.60
  -1  13  -1   14.10    4.70
   1 -13   1   13.20    3.90
   1 -13   1   18.70    5.10
   1 -13   1   10.40    3.40
   1 -13   1   16.40    4.20
   1 -13   1   19.10    5.70
   1 -13   1   17.00    3.70
   1 -13   1   19.40    3.20
   1 -13   1   21.20    4.00
   1 -13   1   12.10    4.70
  -2  13  -1   -0.70    3.50
  -2  13  -1    5.80    4.50
  -2  13  -1    4.50    4.30
  -2  13  -1    4.30    3.20
  -2  13  -1   10.20    3.60
  -2  13  -1    1.30    3.00
  -2  13  -1    6.00    3.90
   2 -13   1    3.40    3.10
   2 -13   1    5.50    4.60
   2 -13   1   -0.50    3.30
   2 -13   1    2.00    3.20
   2 -13   1    2.80    4.10
   2 -13   1    5.90    2.40
   2 -13   1    2.20    1.80
   2 -13   1    5.00    3.50
  -3  13  -1   36.70    8.00
  -3  13  -1   36.10    7.30
  -3  13  -1   32.80    5.60
  -3  13  -1   33.80    7.30
  -3  13  -1   30.10    6.70
  -3  13  -1   41.00    8.00
  -3  13  -1   44.80    9.00
   3 -13   1   38.20    4.90
   3 -13   1   36.40    7.30
   3 -13   1   36.40    7.10
   3 -13   1   40.00    7.20
   3 -13   1   22.80    5.20
   3 -13   1   33.90    4.10
   3 -13   1   41.20    8.80
   3 -13   1   20.70    5.70
  -4  13  -1  442.76   28.60
  -4  13  -1  372.86   22.70
  -4  13  -1  437.46   24.40
  -4  13  -1  409.06   21.90
  -4  13  -1  418.46   21.10
  -4  13  -1  425.26   25.30
  -4  13  -1  435.56   25.40
   4 -13   1  467.05   24.90
   4 -13   1  432.26   18.60
   4 -13   1  436.16   18.00
   4 -13   1  398.86   22.10
   4 -13   1  432.76   25.10
   4 -13   1  450.95   24.90
  -5  13  -1    2.40    3.50
  -5  13  -1   -2.80    4.10
  -5  13  -1    3.80    3.80
  -5  13  -1    1.10    3.90
  -5  13  -1   -0.90    3.20
  -5  13  -1    0.60    4.50
  -5  13  -1   -1.30    4.00
   5 -13   1    1.10    3.80
   5 -13   1   -2.60    3.90
   5 -13   1    0.60    4.20
   5 -13   1   -3.10    1.40
   5 -13   1    0.30    3.70
   5 -13   1    3.60    2.30
   5 -13   1    2.10    2.60
  -6  13  -1  687.23   34.10
  -6  13  -1  648.04   36.70
  -6  13  -1  633.84   31.40
  -6  13  -1  692.93   36.00
  -6  13  -1  637.84   30.40
  -6  13  -1  681.23   35.90
  -6  13  -1  689.03   32.30
   6 -13   1  649.24   27.40
   6 -13   1  669.43   34.90
   6 -13   1  693.33   34.80
   6 -13   1  680.13   33.10
   6 -13   1  669.43   28.20
   6 -13   1  671.43   27.40
  -7  13  -1  213.48   15.80
  -7  13  -1  186.38   14.60
  -7  13  -1  250.87   18.40
  -7  13  -1  214.18   19.40
  -7  13  -1  197.78   18.30
  -7  13  -1  228.98   19.50
  -7  13  -1  210.68   16.60
   7 -13   1  205.18   18.10
   7 -13   1  192.08   17.20
   7 -13   1  203.48   12.10
   7 -13   1  211.68   12.10
   7 -13   1  209.28   16.20
   7 -13   1  206.48   12.20
  -8  13  -1  384.66   22.70
  -8  13  -1  409.86   24.60
  -8  13  -1  347.07   21.50
  -8  13  -1  321.47   22.70
  -8  13  -1  403.06   26.70
  -8  13  -1  358.76   25.70
   8 -13   1  346.67   21.40
   8 -13   1  346.57   18.30
   8 -13   1  375.16   17.60
   8 -13   1  371.76   18.10
   8 -13   1  375.26   21.90
   8 -13   1  350.86   24.50
   8 -13   1  342.87   24.40
  -9  13  -1  439.16   25.60
  -9  13  -1  375.06   26.60
  -9  13  -1  393.76   24.40
  -9  13  -1  453.95   29.50
  -9  13  -1  387.26   28.10
  -9  13  -1  400.46   26.00
   9 -13   1  422.76   23.90
   9 -13   1  437.96   20.60
   9 -13   1  418.56   27.10
   9 -13   1  400.56   21.00
   9 -13   1  395.26   24.10
   9 -13   1  478.55   28.50
   9 -13   1  406.06   19.80
 -10  13  -1   41.30    8.60
 -10  13  -1   30.10    7.00
 -10  13  -1   28.60    8.80
 -10  13  -1   35.00    9.10
 -10  13  -1   34.90    8.20
 -10  13  -1   32.70    7.60
  10 -13   1   26.90    8.10
  10 -13   1   26.20    6.00
  10 -13   1   14.60    4.40
  10 -13   1   40.30    8.20
  10 -13   1   27.70    5.10
  10 -13   1   38.70    9.40
 -11  13  -1  131.19   24.10
 -11  13  -1  123.19   15.70
 -11  13  -1  148.89   30.80
 -11  13  -1  119.29   20.50
 -11  13  -1  115.49   13.50
 -11  13  -1  118.19   16.60
  11 -13   1  125.49   14.00
  11 -13   1  157.68   20.80
  11 -13   1  154.08   12.00
  11 -13   1  133.69   10.90
  11 -13   1  136.69   13.20
  11 -13   1  168.88   19.30
 -12  13  -1    4.20    7.00
 -12  13  -1    5.60    6.70
 -12  13  -1   -5.00    5.70
 -12  13  -1    3.80    7.00
  12 -13   1    4.20    4.70
  12 -13   1   -1.50    8.00
  12 -13   1    3.70    5.30
  12 -13   1   -2.90    5.00
  12 -13   1   -3.20    7.80
  13  12  -1   16.90    6.10
  13  12  -1   26.10    7.60
  13  12  -1   15.90    8.10
 -13 -12   1   17.90    7.10
 -13 -12   1   30.90   10.90
 -13 -12   1   13.90    6.30
 -13 -12   1    8.20    8.30
  12  12  -1   15.10    6.30
  12  12  -1   16.40    8.70
  12  12  -1   21.60    6.10
  12  12  -1    8.70    5.50
 -12 -12   1   13.60    8.00
 -12 -12   1    8.60    5.30
 -12 -12   1   15.40    5.80
 -12 -12   1   -0.50    4.30
  11  12  -1  362.06   26.80
  11  12  -1  298.37   19.50
  11  12  -1  288.27   22.60
  11  12  -1  344.87   21.50
  11  12  -1  353.26   23.40
  11  12  -1  383.16   27.50
 -11 -12   1  303.87   22.40
 -11 -12   1  330.57   20.90
 -11 -12   1  344.97   22.60
 -11 -12   1  354.36   27.40
 -11 -12   1  346.97   23.80
  10  12  -1  101.69   13.40
  10  12  -1   77.39   12.00
  10  12  -1   63.19   13.50
  10  12  -1   47.20   11.20
  10  12  -1   77.99   10.80
  10  12  -1   49.10    8.10
 -10 -12   1   73.59    8.30
 -10 -12   1   60.39   11.20
 -10 -12   1   75.09   13.80
 -10 -12   1   78.39   12.50
 -10 -12   1   71.59   11.50
 -10 -12   1   82.09    9.50
   9  12  -1  459.85   26.80
   9  12  -1  441.46   23.40
   9  12  -1  517.15   31.90
   9  12  -1  438.56   29.10
   9  12  -1  494.35   27.90
   9  12  -1  523.65   26.20
  -9 -12   1  485.25   23.20
  -9 -12   1  506.35   27.70
  -9 -12   1  485.35   30.70
  -9 -12   1  509.45   27.90
  -9 -12   1  482.05   23.60
  -9 -12   1  471.65   27.00
   8  12  -1  744.23   36.10
   8  12  -1  691.63   31.80
   8  12  -1  767.92   36.80
   8  12  -1  734.03   39.80
   8  12  -1  715.23   38.30
   8  12  -1  837.62   48.40
   8  12  -1  738.13   34.80
  -8 -12   1  715.03   27.80
  -8 -12   1  690.83   35.40
  -8 -12   1  747.03   32.10
  -8 -12   1  776.82   36.10
  -8 -12   1  798.72   39.90
  -8 -12   1  692.33   31.20
   7  12  -1  445.36   22.60
   7  12  -1  411.96   19.80
   7  12  -1  429.76   24.30
   7  12  -1  393.06   25.40
   7  12  -1  410.06   25.00
   7  12  -1  380.26   23.00
   7  12  -1  453.85   23.10
   7  12  -1  430.06   30.40
  -7 -12   1  408.76   24.90
  -7 -12   1  405.16   20.10
  -7 -12   1  415.86   23.10
  -7 -12   1  448.86   20.00
  -7 -12   1  454.85   27.20
  -7 -12   1  407.26   17.60
  -7 -12   1  428.06   23.50
  -7 -12   1  417.76   24.50
   6  12  -1  602.94   30.70
   6  12  -1  622.04   30.30
   6  12  -1  602.74   33.50
   6  12  -1  553.04   29.20
   6  12  -1  650.03   28.90
   6  12  -1  560.64   25.00
   6  12  -1  580.04   34.50
  -6 -12   1  610.54   26.10
  -6 -12   1  630.14   26.30
  -6 -12   1  579.74   24.50
  -6 -12   1  557.84   29.00
  -6 -12   1  649.64   33.10
  -6 -12   1  618.54   29.30
  -6 -12   1  582.34   31.10
   5  12  -1    5.50    5.00
   5  12  -1    1.20    3.30
   5  12  -1    2.80    3.40
   5  12  -1   -1.30    1.20
   5  12  -1    3.10    3.80
   5  12  -1    4.40    3.60
   5  12  -1    3.20    1.70
   5  12  -1    3.40    3.90
  -5 -12   1    3.20    4.30
  -5 -12   1    1.00    3.50
  -5 -12   1    5.00    2.80
  -5 -12   1    3.80    2.40
  -5 -12   1   -2.80    1.80
  -5 -12   1    3.20    3.60
  -5 -12   1    1.00    3.00
  -5 -12   1    3.00    2.00
   4  12  -1  216.58   15.20
   4  12  -1  225.78   14.70
   4  12  -1  225.28   17.60
   4  12  -1  229.68   15.80
   4  12  -1  228.68   13.90
   4  12  -1  231.08   14.20
   4  12  -1  224.78   15.90
  -4 -12   1  211.88   11.20
  -4 -12   1  227.78   16.90
  -4 -12   1  251.07   14.40
  -4 -12   1  236.58   17.00
  -4 -12   1  215.48   12.20
  -4 -12   1  228.88   14.80
  -4 -12   1  226.58   12.10
   3  12  -1   18.20    4.20
   3  12  -1   29.20    7.10
   3  12  -1   27.60    5.70
   3  12  -1   19.00    4.70
   3  12  -1   16.10    4.80
   3  12  -1   16.60    5.10
  -3 -12   1   15.00    3.40
  -3 -12   1   37.40    7.90
  -3 -12   1   22.10    5.40
  -3 -12   1   18.20    5.10
  -3 -12   1   22.50    4.50
  -3 -12   1   29.00    4.80
  -3 -12   1   22.50    3.60
   2  12  -1  174.78    9.30
   2  12  -1  202.18   13.00
   2  12  -1  192.28   12.20
   2  12  -1  204.38   13.50
   2  12  -1  235.68   14.90
   2  12  -1  216.58   14.50
   2  12  -1  219.68   12.80
   2  12  -1  202.98   14.60
   2  12  -1  206.88   12.80
  -2 -12   1  209.18   10.50
  -2 -12   1  208.68    9.80
  -2 -12   1  196.58   11.80
  -2 -12   1  205.58   12.00
  -2 -12   1  199.28   15.50
  -2 -12   1  199.78   14.90
  -2 -12   1  192.98   11.80
  -2 -12   1  188.38   12.80
   1  12  -1   16.60    4.30
   1  12  -1    7.10    3.30
   1  12  -1    5.80    3.90
   1  12  -1    8.50    3.50
   1  12  -1   12.10    4.20
   1  12  -1    9.70    3.20
   1  12  -1    6.60    2.40
   1  12  -1    6.60    3.40
   1  12  -1    7.50    3.40
  -1 -12   1    9.00    2.50
  -1 -12   1   12.50    3.70
  -1 -12   1    6.80    2.50
  -1 -12   1    6.80    2.80
  -1 -12   1   10.70    3.40
  -1 -12   1   10.50    4.10
  -1 -12   1    5.40    2.10
  -1 -12   1    9.90    4.30
   0  12  -1  724.03   33.20
   0  12  -1  809.72   35.60
   0  12  -1  770.62   34.90
   0  12  -1  819.82   36.10
   0  12  -1  787.72   33.00
   0  12  -1  811.52   34.70
   0  12  -1  802.22   34.60
   0  12  -1  784.72   32.80
   0 -12   1  806.52   35.90
   0 -12   1  774.62   33.40
   0 -12   1  754.32   33.60
   0 -12   1  714.53   33.00
   0 -12   1  764.62   29.70
   0 -12   1  722.33   32.10
   0 -12   1  784.62   31.00
   0 -12   1  752.82   30.20
   0 -12   1  768.32   36.60
  -1  12  -1  188.48   14.10
  -1  12  -1  193.88   11.90
  -1  12  -1  189.08   13.00
  -1  12  -1  177.18   13.30
  -1  12  -1  184.68   11.30
  -1  12  -1  184.08   13.50
  -1  12  -1  186.58   13.10
  -1  12  -1  166.78   11.70
   1 -12   1  173.58    8.70
   1 -12   1  195.98    9.60
   1 -12   1  176.38   12.20
   1 -12   1  201.98   15.20
   1 -12   1  186.98   11.00
   1 -12   1  182.68    9.20
   1 -12   1  181.18   12.10
   1 -12   1  189.98   13.80
   1 -12   1  176.78   14.20
   1 -12   1  175.18   11.80
  -2  12  -1 1051.49   44.90
  -2  12  -1 1038.50   43.70
  -2  12  -1 1037.60   44.60
  -2  12  -1 1010.30   42.10
  -2  12  -1 1024.60   42.50
  -2  12  -1  987.20   41.40
  -2  12  -1 1008.90   45.10
  -2  12  -1  982.90   43.90
   2 -12   1 1043.80   38.70
   2 -12   1 1028.10   45.20
   2 -12   1  974.20   41.10
   2 -12   1  991.30   42.70
   2 -12   1 1012.90   39.20
   2 -12   1 1014.30   44.60
   2 -12   1 1131.79   46.00
   2 -12   1 1004.30   42.50
   2 -12   1 1016.30   43.20
  -3  12  -1  510.65   26.50
  -3  12  -1  469.65   24.90
  -3  12  -1  477.75   23.70
  -3  12  -1  501.85   26.20
  -3  12  -1  394.56   26.70
  -3  12  -1  509.35   25.10
  -3  12  -1  479.75   25.20
  -3  12  -1  481.85   22.60
  -3  12  -1  487.65   23.40
   3 -12   1  541.35   26.60
   3 -12   1  493.45   24.60
   3 -12   1  501.75   20.70
   3 -12   1  468.85   23.80
   3 -12   1  464.15   27.20
   3 -12   1  516.25   26.10
   3 -12   1  496.25   26.40
   3 -12   1  500.05   20.00
  -4  12  -1  681.13   30.50
  -4  12  -1  666.23   32.70
  -4  12  -1  685.23   32.00
  -4  12  -1  743.23   34.20
  -4  12  -1  610.44   30.70
  -4  12  -1  665.23   32.10
  -4  12  -1  687.03   29.60
  -4  12  -1  655.43   33.30
   4 -12   1  704.33   33.60
   4 -12   1  692.93   32.00
   4 -12   1  545.45   30.60
   4 -12   1  713.83   32.80
   4 -12   1  671.33   27.40
   4 -12   1  667.93   26.80
   4 -12   1  683.73   33.00
   4 -12   1  676.23   31.10
  -5  12  -1  764.02   35.00
  -5  12  -1  728.13   36.60
  -5  12  -1  789.52   37.10
  -5  12  -1  759.52   33.40
  -5  12  -1  692.03   34.50
  -5  12  -1  692.93   31.80
  -5  12  -1  736.53   33.30
   5 -12   1  773.02   36.10
   5 -12   1  731.03   29.30
   5 -12   1  728.33   36.00
   5 -12   1  749.42   34.90
   5 -12   1  714.93   29.30
   5 -12   1  706.73   30.90
  -6  12  -1   43.00    8.20
  -6  12  -1   57.69   11.20
  -6  12  -1   57.39    7.80
  -6  12  -1   58.79   10.60
  -6  12  -1   47.80   11.80
  -6  12  -1   53.29    8.30
  -6  12  -1   51.19    7.90
   6 -12   1   60.89    6.00
   6 -12   1   47.60   11.60
   6 -12   1   57.89    6.70
   6 -12   1   61.89   10.90
   6 -12   1   47.20    5.60
   6 -12   1   47.30   10.00
   6 -12   1   45.80    9.30
  -7  12  -1  164.18   12.00
  -7  12  -1  165.28   13.50
  -7  12  -1  180.98   15.30
  -7  12  -1  155.78   14.10
  -7  12  -1  172.88   16.60
  -7  12  -1  147.69   12.50
  -7  12  -1  169.18   16.00
  -7  12  -1  164.48   14.70
   7 -12   1  165.38   10.90
   7 -12   1  153.58   13.00
   7 -12   1  166.78   13.90
   7 -12   1  163.58   17.60
   7 -12   1  151.08   15.00
   7 -12   1  158.38   10.60
  -8  12  -1    2.30    5.00
  -8  12  -1    5.30    5.70
  -8  12  -1   -0.30    4.80
  -8  12  -1    7.20    4.60
  -8  12  -1   10.30    4.10
  -8  12  -1   -1.30    4.60
   8 -12   1   -0.60    3.90
   8 -12   1    6.10    5.30
   8 -12   1    0.70    4.00
   8 -12   1    1.10    3.40
   8 -12   1    2.70    3.00
   8 -12   1    1.20    2.70
   8 -12   1    5.80    4.00
  -9  12  -1    4.10    6.20
  -9  12  -1    6.50    5.30
  -9  12  -1    4.50    5.60
  -9  12  -1    5.90    5.50
  -9  12  -1   -1.30    5.60
  -9  12  -1    4.30    4.20
   9 -12   1    0.10    4.20
   9 -12   1    3.10    3.40
   9 -12   1    2.90    4.40
   9 -12   1    9.60    4.20
   9 -12   1    9.20    6.30
   9 -12   1    6.70    4.00
   9 -12   1   -2.90    3.00
 -10  12  -1   21.30    6.20
 -10  12  -1   21.80    7.80
 -10  12  -1   48.50   10.30
 -10  12  -1   23.20    8.10
 -10  12  -1   16.30    6.50
 -10  12  -1   30.00    7.70
  10 -12   1   25.10    5.70
  10 -12   1   21.70    5.30
  10 -12   1    8.50    4.40
  10 -12   1   37.90    9.20
  10 -12   1   22.30    7.00
  10 -12   1   24.20    6.70
  10 -12   1   29.70    5.60
 -11  12  -1  211.48   21.20
 -11  12  -1  164.48   23.40
 -11  12  -1  210.88   18.20
 -11  12  -1  213.88   17.00
 -11  12  -1  235.38   19.60
 -11  12  -1  236.28   21.80
  11 -12   1  190.78   13.60
  11 -12   1  171.78   15.40
  11 -12   1  191.58   14.00
  11 -12   1  220.68   19.40
  11 -12   1  233.98   21.70
  11 -12   1  208.58   15.70
 -12  12  -1    4.70    6.30
 -12  12  -1   -9.50    6.20
 -12  12  -1   -7.40    4.30
 -12  12  -1    5.10    7.80
 -12  12  -1   -0.40    4.90
  12 -12   1   -0.80    6.50
  12 -12   1   -4.70    3.60
  12 -12   1   -2.50    6.60
  12 -12   1    3.60    7.20
  12 -12   1   -2.70    7.50
  12 -12   1  -10.50    3.60
  13  11  -1  385.86   27.40
  13  11  -1  407.86   26.80
  13  11  -1  425.06   32.80
  13  11  -1  407.06   27.00
  13  11  -1  392.86   21.70
 -13 -11   1  393.46   23.30
 -13 -11   1  434.16   32.30
 -13 -11   1  430.96   30.70
  12  11  -1  288.17   21.20
  12  11  -1  245.18   20.20
  12  11  -1  229.48   30.60
  12  11  -1  231.48   22.80
  12  11  -1  261.77   18.00
 -12 -11   1  268.07   21.20
 -12 -11   1  219.98   19.50
 -12 -11   1  242.38   17.00
 -12 -11   1  285.57   24.50
  11  11  -1  165.18   18.00
  11  11  -1  141.99   18.20
  11  11  -1  186.38   19.60
  11  11  -1  166.98   16.20
  11  11  -1  153.98   13.00
  11  11  -1  168.48   14.70
 -11 -11   1  158.28   15.70
 -11 -11   1  155.18   13.30
 -11 -11   1  162.78   19.10
 -11 -11   1  167.18   15.80
  10  11  -1  358.66   23.30
  10  11  -1  363.16   26.30
  10  11  -1  302.87   18.80
  10  11  -1  369.56   23.20
  10  11  -1  333.77   20.30
  10  11  -1  305.47   24.00
 -10 -11   1  335.17   22.20
 -10 -11   1  364.06   26.30
 -10 -11   1  342.87   22.20
 -10 -11   1  351.86   30.20
 -10 -11   1  357.86   19.30
 -10 -11   1  343.97   18.50
   9  11  -1   81.69   15.30
   9  11  -1   31.80    8.90
   9  11  -1   36.50    8.30
   9  11  -1   47.50    7.40
   9  11  -1   65.19   10.00
   9  11  -1   57.09   12.30
  -9 -11   1   41.10    6.70
  -9 -11   1   45.10    7.60
  -9 -11   1   53.89    9.80
  -9 -11   1   50.79   12.30
  -9 -11   1   48.70    9.80
  -9 -11   1   54.29    9.70
   8  11  -1   30.80    5.80
   8  11  -1   30.30    6.40
   8  11  -1   24.60    5.90
   8  11  -1   22.20    8.30
   8  11  -1   26.30    6.10
   8  11  -1   25.50    6.20
  -8 -11   1   30.10    6.20
  -8 -11   1   27.20    5.40
  -8 -11   1   26.30    6.10
  -8 -11   1   29.70    3.00
  -8 -11   1   42.10    5.90
  -8 -11   1   33.60    8.00
  -8 -11   1   19.50    5.10
  -8 -11   1   31.90    8.50
   7  11  -1   86.89    9.80
   7  11  -1   78.19    9.90
   7  11  -1   59.29   11.70
   7  11  -1   66.29   10.50
   7  11  -1   85.59   10.60
   7  11  -1   79.49   13.70
  -7 -11   1   73.59    7.80
  -7 -11   1   90.79   12.30
  -7 -11   1   73.99    9.70
  -7 -11   1   73.39    5.10
  -7 -11   1   84.99   11.00
  -7 -11   1   77.89    7.10
  -7 -11   1   65.89    9.70
   6  11  -1  120.99   11.90
   6  11  -1  127.29   10.50
   6  11  -1  147.09   15.30
   6  11  -1  139.29   14.20
   6  11  -1  123.29    8.40
   6  11  -1  132.49   10.90
   6  11  -1  127.29   11.00
   6  11  -1  115.29   12.20
   6  11  -1  149.39   12.90
  -6 -11   1  119.29   10.90
  -6 -11   1  138.99    9.10
  -6 -11   1  123.99    7.40
  -6 -11   1  124.09   12.60
  -6 -11   1  130.29   13.40
  -6 -11   1  124.09   11.10
  -6 -11   1  133.19   13.30
  -6 -11   1  129.19    9.20
   5  11  -1   55.99   10.10
   5  11  -1   55.79    8.80
   5  11  -1   87.09    9.80
   5  11  -1   74.19    8.90
   5  11  -1   73.59    9.00
   5  11  -1   69.59    5.60
   5  11  -1   78.19    8.20
   5  11  -1   78.19    8.90
   5  11  -1   72.79    8.20
  -5 -11   1   75.69   10.10
  -5 -11   1   77.09    6.90
  -5 -11   1   67.99    9.90
  -5 -11   1   60.89    7.90
  -5 -11   1   50.59    7.90
  -5 -11   1   75.59    5.70
  -5 -11   1   70.79    8.50
  -5 -11   1   69.39    6.00
   4  11  -1  466.25   23.60
   4  11  -1  466.15   22.00
   4  11  -1  465.15   25.70
   4  11  -1  422.36   22.00
   4  11  -1  417.46   18.00
   4  11  -1  437.46   24.00
   4  11  -1  454.25   22.90
   4  11  -1  465.45   21.70
   4  11  -1  456.05   24.60
  -4 -11   1  444.46   19.80
  -4 -11   1  464.35   22.00
  -4 -11   1  443.46   24.60
  -4 -11   1  472.25   23.10
  -4 -11   1  437.66   23.90
  -4 -11   1  455.85   23.00
  -4 -11   1  451.05   19.30
  -4 -11   1  426.86   24.30
  -4 -11   1  450.55   19.70
   3  11  -1  292.57   15.80
   3  11  -1  326.87   17.60
   3  11  -1  318.77   16.10
   3  11  -1  313.67   17.80
   3  11  -1  302.77   17.40
   3  11  -1  319.37   18.10
   3  11  -1  305.17   15.40
   3  11  -1  270.87   17.20
  -3 -11   1  295.37   18.90
  -3 -11   1  304.27   13.70
  -3 -11   1  298.17   15.90
  -3 -11   1  322.67   18.90
  -3 -11   1  288.07   16.70
  -3 -11   1  292.87   14.70
  -3 -11   1  303.17   14.30
  -3 -11   1  302.87   15.80
   2  11  -1 2057.49   79.39
   2  11  -1 1951.50   77.19
   2  11  -1 2133.29   78.29
   2  11  -1 1802.12   76.09
   2  11  -1 2068.09   77.19
   2  11  -1 1914.11   78.69
   2  11  -1 2104.79   79.19
   2  11  -1 2094.39   76.69
   2  11  -1 1875.01   73.39
  -2 -11   1 2015.80   74.49
  -2 -11   1 2042.40   75.99
  -2 -11   1 1950.10   79.99
  -2 -11   1 2040.20   77.89
  -2 -11   1 2021.70   75.99
  -2 -11   1 1910.31   76.19
  -2 -11   1 2070.19   79.89
  -2 -11   1 2001.70   73.89
   1  11  -1  649.24   27.70
   1  11  -1  696.13   30.40
   1  11  -1  640.94   31.40
   1  11  -1  719.53   31.90
   1  11  -1  711.73   30.30
   1  11  -1  621.44   29.10
   1  11  -1  718.53   31.10
   1  11  -1  705.63   29.80
   1  11  -1  719.13   32.40
  -1 -11   1  715.33   33.30
  -1 -11   1  707.83   32.40
  -1 -11   1  761.62   35.40
  -1 -11   1  709.33   28.70
  -1 -11   1  670.73   29.20
  -1 -11   1  697.83   27.70
  -1 -11   1  692.73   30.70
   0  11  -1 1180.48   47.50
   0  11  -1 1175.88   48.80
   0  11  -1 1044.30   47.40
   0  11  -1 1194.88   46.20
   0  11  -1 1082.49   45.50
   0  11  -1 1188.38   47.40
   0  11  -1 1130.29   46.40
   0  11  -1 1190.68   48.30
   0 -11   1 1159.08   47.00
   0 -11   1 1190.68   44.30
   0 -11   1 1174.78   47.50
   0 -11   1 1197.18   49.70
   0 -11   1 1163.18   46.50
   0 -11   1 1140.39   43.80
   0 -11   1 1135.99   48.60
   0 -11   1 1084.89   45.40
   0 -11   1 1155.68   43.20
  -1  11  -1 1159.68   45.10
  -1  11  -1 1108.69   46.20
  -1  11  -1 1146.39   47.30
  -1  11  -1 1044.30   46.50
  -1  11  -1 1152.28   47.00
  -1  11  -1 1116.79   45.50
  -1  11  -1 1136.69   47.70
  -1  11  -1  994.20   44.10
   1 -11   1 1096.09   45.70
   1 -11   1 1102.49   44.40
   1 -11   1 1182.98   48.00
   1 -11   1 1106.29   42.40
   1 -11   1 1160.88   48.50
   1 -11   1 1115.99   42.10
   1 -11   1 1160.68   46.00
   1 -11   1 1115.39   42.80
   1 -11   1 1143.99   46.00
   1 -11   1 1157.48   47.60
  -2  11  -1  223.08   14.40
  -2  11  -1  240.18   14.40
  -2  11  -1  235.68   15.10
  -2  11  -1  223.18   15.10
  -2  11  -1  190.88   13.60
  -2  11  -1  219.38   13.00
  -2  11  -1  223.68   13.10
  -2  11  -1  205.28   12.00
   2 -11   1  225.88   15.10
   2 -11   1  235.58   15.50
   2 -11   1  224.48   14.70
   2 -11   1  216.98   10.90
   2 -11   1  218.78   13.40
   2 -11   1  202.08   12.00
   2 -11   1  225.38   13.90
   2 -11   1  218.58   10.20
  -3  11  -1  297.77   17.70
  -3  11  -1  295.77   16.80
  -3  11  -1  308.37   16.40
  -3  11  -1  294.97   16.00
  -3  11  -1  286.97   15.10
  -3  11  -1  306.97   18.60
  -3  11  -1  300.17   17.40
  -3  11  -1  306.47   17.20
  -3  11  -1  271.37   18.10
   3 -11   1  299.57   18.00
   3 -11   1  278.37   18.10
   3 -11   1  314.47   18.60
   3 -11   1  320.57   17.40
   3 -11   1  310.27   16.60
   3 -11   1  304.27   13.20
   3 -11   1  264.97   16.00
   3 -11   1  287.47   15.10
   3 -11   1  308.47   14.00
  -4  11  -1    3.20    3.60
  -4  11  -1   11.10    3.40
  -4  11  -1    3.70    2.80
  -4  11  -1    0.80    3.50
  -4  11  -1    2.80    3.20
  -4  11  -1    9.30    3.40
  -4  11  -1    3.60    3.10
  -4  11  -1    3.80    3.30
  -4  11  -1    6.00    4.30
   4 -11   1    1.70    3.20
   4 -11   1    0.70    3.90
   4 -11   1    3.40    2.40
   4 -11   1    6.60    3.40
   4 -11   1    2.10    1.60
   4 -11   1    5.10    4.20
   4 -11   1    6.30    2.90
   4 -11   1    5.50    2.30
   4 -11   1    2.20    2.90
  -5  11  -1  136.29   11.70
  -5  11  -1  118.69   10.40
  -5  11  -1  116.99   12.30
  -5  11  -1   95.39   10.50
  -5  11  -1  123.29   12.80
  -5  11  -1  136.29   10.70
  -5  11  -1  141.49   12.10
  -5  11  -1  123.59   10.60
  -5  11  -1  108.49    9.00
   5 -11   1  106.09   10.20
   5 -11   1  118.49    7.70
   5 -11   1  121.79   11.80
   5 -11   1  124.59    8.90
   5 -11   1  108.99    7.60
   5 -11   1  135.39   12.90
   5 -11   1  139.19   11.70
   5 -11   1  133.39   12.40
  -6  11  -1    5.70    3.30
  -6  11  -1    3.10    3.60
  -6  11  -1    0.30    4.10
  -6  11  -1    2.70    4.20
  -6  11  -1    2.70    3.30
  -6  11  -1   -2.50    3.10
  -6  11  -1    2.30    4.40
   6 -11   1   -0.40    2.00
   6 -11   1    2.80    3.20
   6 -11   1    0.70    3.40
   6 -11   1   -1.00    3.40
   6 -11   1    1.90    2.30
   6 -11   1    3.50    2.90
   6 -11   1   -1.10    3.50
   6 -11   1    0.50    4.70
  -7  11  -1  436.06   26.10
  -7  11  -1  442.96   26.50
  -7  11  -1  400.56   24.60
  -7  11  -1  387.76   22.40
  -7  11  -1  436.46   22.90
  -7  11  -1  442.36   25.60
  -7  11  -1  475.25   25.20
   7 -11   1  423.26   20.30
   7 -11   1  420.26   25.10
   7 -11   1  445.46   20.40
   7 -11   1  393.66   22.60
   7 -11   1  449.26   26.20
   7 -11   1  437.56   22.90
   7 -11   1  436.46   19.70
  -8  11  -1    0.10    3.10
  -8  11  -1    3.50    4.70
  -8  11  -1    3.50    4.00
  -8  11  -1    5.60    3.60
  -8  11  -1    8.20    5.80
  -8  11  -1    2.00    4.60
  -8  11  -1    0.40    4.30
   8 -11   1    1.70    3.60
   8 -11   1   17.70    6.60
   8 -11   1    1.70    3.00
   8 -11   1    3.50    2.90
   8 -11   1    1.00    4.20
   8 -11   1    4.00    3.70
   8 -11   1   -0.70    2.70
  -9  11  -1  818.92   39.30
  -9  11  -1  800.02   41.00
  -9  11  -1  817.22   46.10
  -9  11  -1  690.03   38.60
  -9  11  -1  819.62   41.70
  -9  11  -1  784.52   37.20
   9 -11   1  768.42   33.50
   9 -11   1  737.13   32.70
   9 -11   1  755.82   34.10
   9 -11   1  817.12   40.30
   9 -11   1  743.33   36.80
   9 -11   1  787.02   35.40
   9 -11   1  785.52   39.20
 -10  11  -1  398.26   24.70
 -10  11  -1  366.56   22.60
 -10  11  -1  316.87   23.40
 -10  11  -1  305.47   20.80
 -10  11  -1  387.26   26.60
 -10  11  -1  398.56   26.80
  10 -11   1  351.96   18.70
  10 -11   1  394.76   25.70
  10 -11   1  337.57   19.80
  10 -11   1  339.47   24.10
  10 -11   1  376.76   19.30
  10 -11   1  337.27   22.10
 -11  11  -1  286.37   23.40
 -11  11  -1  341.57   24.10
 -11  11  -1  392.96   27.60
 -11  11  -1  386.16   23.80
 -11  11  -1  376.16   26.40
 -11  11  -1  323.97   21.90
  11 -11   1  356.86   23.40
  11 -11   1  372.46   20.20
  11 -11   1  363.06   23.00
  11 -11   1  356.86   19.60
  11 -11   1  381.76   27.00
  11 -11   1  349.37   24.60
  11 -11   1  349.17   19.00
 -12  11  -1  144.09   17.10
 -12  11  -1  146.59   17.10
 -12  11  -1  111.29   14.60
 -12  11  -1  135.09   18.40
 -12  11  -1  145.29   16.30
 -12  11  -1  125.49   17.60
  12 -11   1  130.49   16.20
  12 -11   1  126.39   12.00
  12 -11   1  156.28   19.00
 -13  11  -1   11.80    7.20
 -13  11  -1    7.00    6.70
 -13  11  -1    8.90    7.30
  13 -11   1   11.00    5.40
  13 -11   1   21.30    8.00
  13 -11   1   14.20    4.60
  13 -11   1   12.00    7.60
  14  10  -1  176.88   16.90
  14  10  -1  182.38   23.10
  14  10  -1  216.88   22.80
  14  10  -1  183.58   13.30
 -14 -10   1  178.98   18.80
 -14 -10   1  183.78   15.70
 -14 -10   1  213.88   23.60
  13  10  -1   29.30    8.10
  13  10  -1   43.40    8.00
  13  10  -1   38.00   11.10
  13  10  -1   26.90    7.50
  13  10  -1   29.40    7.50
 -13 -10   1   48.30   12.00
 -13 -10   1   27.80    7.30
 -13 -10   1   20.10    6.80
 -13 -10   1   31.50    8.00
  12  10  -1   50.49   10.00
  12  10  -1   32.20    8.90
  12  10  -1   56.59   11.20
  12  10  -1   59.19   11.70
  12  10  -1   31.70    8.90
 -12 -10   1   49.40   10.90
 -12 -10   1   47.20   12.60
 -12 -10   1   49.80    9.60
 -12 -10   1   27.20    7.30
  11  10  -1   19.00   10.30
  11  10  -1   24.30    6.60
  11  10  -1   22.40    7.00
  11  10  -1   25.60    8.40
  11  10  -1   30.90    5.90
  11  10  -1   19.10    6.10
 -11 -10   1   30.80    7.00
 -11 -10   1   35.10    7.70
 -11 -10   1   25.70    6.10
 -11 -10   1   21.90    7.80
  10  10  -1  200.88   18.90
  10  10  -1  226.38   17.40
  10  10  -1  247.78   16.00
  10  10  -1  209.88   16.80
  10  10  -1  174.78   13.90
  10  10  -1  231.38   20.70
 -10 -10   1  216.68   16.60
 -10 -10   1  220.68   17.40
 -10 -10   1  209.18   13.60
 -10 -10   1  215.78   17.60
 -10 -10   1  231.08   14.90
 -10 -10   1  226.08   20.50
   9  10  -1    5.60    3.40
   9  10  -1   11.40    4.60
   9  10  -1    9.30    5.50
   9  10  -1    5.70    5.50
   9  10  -1    8.00    7.50
   9  10  -1    7.20    4.60
   9  10  -1    5.70    4.00
  -9 -10   1    8.30    4.20
  -9 -10   1    8.40    3.70
  -9 -10   1   11.60    4.00
  -9 -10   1    8.90    5.70
  -9 -10   1   15.70    5.70
  -9 -10   1    9.80    6.70
   8  10  -1 1132.19   49.50
   8  10  -1 1088.09   51.99
   8  10  -1 1184.48   48.90
   8  10  -1 1135.49   53.19
   8  10  -1 1064.89   48.80
   8  10  -1 1096.99   47.20
   8  10  -1 1166.28   49.60
   8  10  -1 1087.29   46.30
  -8 -10   1 1133.69   52.59
  -8 -10   1 1098.99   45.40
  -8 -10   1 1096.09   41.90
  -8 -10   1 1128.09   49.20
  -8 -10   1 1151.08   46.10
  -8 -10   1 1153.68   49.10
  -8 -10   1 1123.19   48.40
  -8 -10   1 1182.18   49.80
   7  10  -1   48.10   10.20
   7  10  -1   47.90    7.90
   7  10  -1   38.20    7.00
   7  10  -1   35.60    5.90
   7  10  -1   43.30    7.00
   7  10  -1   42.10    8.80
   7  10  -1   32.20    7.30
   7  10  -1   49.80    8.90
  -7 -10   1   45.30    7.90
  -7 -10   1   47.00    6.50
  -7 -10   1   58.09    6.10
  -7 -10   1   58.09   10.10
  -7 -10   1   42.20    3.70
  -7 -10   1   37.50    8.00
  -7 -10   1   46.40    8.30
  -7 -10   1   51.79   11.70
   6  10  -1 1100.89   44.80
   6  10  -1 1120.59   50.29
   6  10  -1 1070.09   46.80
   6  10  -1 1171.38   48.50
   6  10  -1 1144.99   49.20
   6  10  -1 1077.59   47.60
   6  10  -1 1176.68   51.89
   6  10  -1 1164.58   46.50
  -6 -10   1 1113.99   51.99
  -6 -10   1 1125.79   49.20
  -6 -10   1 1163.98   47.80
  -6 -10   1 1172.98   45.40
  -6 -10   1 1089.09   42.90
  -6 -10   1 1106.89   50.59
  -6 -10   1 1195.88   49.30
  -6 -10   1 1142.39   48.00
  -6 -10   1 1147.99   47.40
   5  10  -1  708.63   31.10
   5  10  -1  749.13   34.30
   5  10  -1  726.23   32.70
   5  10  -1  717.53   30.70
   5  10  -1  674.63   31.60
   5  10  -1  735.53   35.40
   5  10  -1  700.33   28.70
   5  10  -1  721.63   32.30
   5  10  -1  635.24   32.70
  -5 -10   1  730.73   33.70
  -5 -10   1  723.43   29.50
  -5 -10   1  700.63   28.80
  -5 -10   1  700.63   28.00
  -5 -10   1  709.33   31.60
  -5 -10   1  747.83   34.80
  -5 -10   1  698.63   31.00
  -5 -10   1  664.23   32.10
  -5 -10   1  662.53   31.60
   4  10  -1  789.22   34.90
   4  10  -1  688.13   31.60
   4  10  -1  755.12   33.60
   4  10  -1  704.23   32.30
   4  10  -1  761.12   35.90
   4  10  -1  712.03   34.20
   4  10  -1  771.52   33.30
   4  10  -1  749.53   31.60
   4  10  -1  664.23   28.80
  -4 -10   1  733.33   32.50
  -4 -10   1  787.52   32.40
  -4 -10   1  755.02   29.80
  -4 -10   1  733.03   34.50
  -4 -10   1  763.82   29.80
  -4 -10   1  732.13   33.00
  -4 -10   1  731.33   34.80
  -4 -10   1  757.02   31.90
  -4 -10   1  775.52   30.40
   3  10  -1 1382.26   56.09
   3  10  -1 1415.96   54.09
   3  10  -1 1387.36   57.39
   3  10  -1 1272.67   54.59
   3  10  -1 1449.65   54.79
   3  10  -1 1403.56   56.89
   3  10  -1 1412.86   56.99
   3  10  -1 1402.86   51.29
   3  10  -1 1377.56   58.09
  -3 -10   1 1452.25   55.09
  -3 -10   1 1351.06   56.09
  -3 -10   1 1470.75   53.49
  -3 -10   1 1438.16   58.09
  -3 -10   1 1410.26   52.79
  -3 -10   1 1352.06   54.79
  -3 -10   1 1414.66   53.69
  -3 -10   1 1411.16   58.09
   2  10  -1   72.89    6.90
   2  10  -1   93.99    7.60
   2  10  -1   82.09    7.90
   2  10  -1   79.49    5.10
   2  10  -1   83.79    8.90
   2  10  -1   89.69    8.00
   2  10  -1   92.79    8.60
   2  10  -1   91.49    7.50
   2  10  -1   81.79    8.60
  -2 -10   1   83.49    5.50
  -2 -10   1   84.69    6.20
  -2 -10   1   86.69    7.70
  -2 -10   1   84.19    8.90
  -2 -10   1   80.79    9.60
  -2 -10   1   80.79    7.00
  -2 -10   1   79.89    6.60
   1  10  -1   59.49    5.30
   1  10  -1   68.99    7.60
   1  10  -1   71.69    7.20
   1  10  -1   79.99    8.50
   1  10  -1   78.49    8.00
   1  10  -1   67.29    9.20
   1  10  -1   66.99    6.80
   1  10  -1   66.99    6.60
   1  10  -1   79.99    7.70
  -1 -10   1   64.09    8.70
  -1 -10   1   67.39    5.90
  -1 -10   1   73.29    5.50
  -1 -10   1   73.19    7.10
  -1 -10   1   80.49    6.70
  -1 -10   1   94.29    8.80
  -1 -10   1   75.19    5.00
  -1 -10   1   72.19    6.90
  -1 -10   1   79.29    6.50
   0  10  -1   29.00    5.90
   0  10  -1   37.70    6.00
   0  10  -1   31.80    6.40
   0  10  -1   36.90    6.00
   0  10  -1   36.00    5.50
   0  10  -1   29.80    5.50
   0 -10   1   32.60    5.70
   0 -10   1   32.70    3.40
   0 -10   1   37.00    4.10
   0 -10   1   38.70    6.50
   0 -10   1   33.90    4.30
   0 -10   1   24.30    5.00
   0 -10   1   29.40    4.50
   0 -10   1   36.80    5.20
  -1  10  -1   82.89    8.20
  -1  10  -1   75.39    8.20
  -1  10  -1   85.99    7.90
  -1  10  -1   83.59    7.60
  -1  10  -1   78.79    7.20
  -1  10  -1   75.69    7.60
  -1  10  -1   79.19    8.10
   1 -10   1   78.69    9.00
   1 -10   1   70.59    6.90
   1 -10   1   79.39    8.20
   1 -10   1   71.49    4.80
   1 -10   1   74.49    5.10
   1 -10   1   78.59    6.40
   1 -10   1   71.89    7.10
   1 -10   1   76.99    8.50
   1 -10   1   70.89    5.40
  -2  10  -1    7.70    2.60
  -2  10  -1   14.00    4.30
  -2  10  -1    9.20    2.70
  -2  10  -1    5.10    2.70
  -2  10  -1    8.50    3.00
  -2  10  -1    9.30    3.20
  -2  10  -1    6.40    3.00
  -2  10  -1    7.70    3.60
   2 -10   1    6.50    3.50
   2 -10   1    4.30    2.30
   2 -10   1   11.30    2.70
   2 -10   1    7.60    1.90
   2 -10   1    5.90    3.10
   2 -10   1    6.20    2.90
   2 -10   1   11.00    3.10
   2 -10   1    8.60    2.30
   2 -10   1    6.10    3.10
  -3  10  -1 1176.48   48.20
  -3  10  -1 1007.40   44.90
  -3  10  -1 1178.58   46.00
  -3  10  -1 1208.18   47.50
  -3  10  -1 1164.08   48.80
  -3  10  -1 1207.08   48.80
  -3  10  -1 1139.09   46.40
  -3  10  -1 1061.69   47.30
   3 -10   1 1157.28   45.50
   3 -10   1 1224.08   49.00
   3 -10   1 1128.19   42.60
   3 -10   1 1132.29   47.30
   3 -10   1 1134.59   44.10
   3 -10   1 1211.58   48.50
   3 -10   1 1104.19   46.70
   3 -10   1 1159.78   43.50
   3 -10   1 1190.18   48.50
  -4  10  -1  187.48   12.60
  -4  10  -1  154.48   10.10
  -4  10  -1  147.59   11.30
  -4  10  -1  168.18   13.10
  -4  10  -1  162.88   12.50
  -4  10  -1  157.38   10.90
  -4  10  -1  175.28   11.20
  -4  10  -1  167.18   12.20
  -4  10  -1  164.88   13.20
   4 -10   1  180.18   13.00
   4 -10   1  175.18   11.70
   4 -10   1  148.39   12.80
   4 -10   1  174.48    9.70
   4 -10   1  173.88   13.00
   4 -10   1  165.18    8.70
   4 -10   1  172.78    9.00
   4 -10   1  171.78   10.40
   4 -10   1  181.98   12.20
  -5  10  -1 2473.45   98.39
  -5  10  -1 2450.55   97.79
  -5  10  -1 2641.04   97.89
  -5  10  -1 2466.05   95.09
  -5  10  -1 2581.54   96.99
  -5  10  -1 2592.84   99.39
  -5  10  -1 2591.64   99.69
  -5  10  -1 2557.84   96.09
  -5  10  -1 2389.76   95.99
   5 -10   1 2508.85   95.29
   5 -10   1 2522.75   93.29
   5 -10   1 2568.44   98.89
   5 -10   1 2495.65   97.19
   5 -10   1 2500.35   98.59
   5 -10   1 2554.24   93.69
   5 -10   1 2529.75   97.59
   5 -10   1 2513.15   96.49
   5 -10   1 2551.54   97.19
   5 -10   1 2469.65   93.89
  -6  10  -1  753.32   33.30
  -6  10  -1  785.02   35.00
  -6  10  -1  761.52   36.80
  -6  10  -1  751.12   33.70
  -6  10  -1  686.53   34.70
  -6  10  -1  743.23   33.50
  -6  10  -1  785.82   36.70
  -6  10  -1  733.13   32.20
   6 -10   1  758.22   34.70
   6 -10   1  755.12   30.50
   6 -10   1  772.32   34.70
   6 -10   1  800.82   34.10
   6 -10   1  768.02   31.30
   6 -10   1  706.63   33.30
   6 -10   1  762.12   31.20
   6 -10   1  706.63   35.30
   6 -10   1  716.53   35.50
  -7  10  -1  256.47   15.00
  -7  10  -1  240.48   17.60
  -7  10  -1  244.08   15.90
  -7  10  -1  255.07   17.30
  -7  10  -1  243.18   15.80
  -7  10  -1  268.77   16.10
  -7  10  -1  254.37   18.70
  -7  10  -1  279.47   19.20
   7 -10   1  247.98   14.00
   7 -10   1  258.77   16.00
   7 -10   1  259.47   13.40
   7 -10   1  284.27   16.20
   7 -10   1  245.48   18.10
   7 -10   1  248.38   14.00
   7 -10   1  268.57   18.30
  -8  10  -1  133.69   14.90
  -8  10  -1  128.39   12.00
  -8  10  -1  140.09   13.60
  -8  10  -1  144.29   12.60
  -8  10  -1  140.59   13.30
  -8  10  -1  128.79   11.60
  -8  10  -1  137.29   14.70
   8 -10   1  145.49   10.50
   8 -10   1  140.29   12.50
   8 -10   1  160.68   15.00
   8 -10   1  145.39   10.70
   8 -10   1  146.49   14.50
   8 -10   1  149.29   10.00
   8 -10   1  147.09   11.90
  -9  10  -1  148.99   11.90
  -9  10  -1  152.08   14.50
  -9  10  -1  142.09   14.70
  -9  10  -1  146.99   15.90
  -9  10  -1  169.38   16.60
  -9  10  -1  137.59   12.90
  -9  10  -1  155.38   13.20
   9 -10   1  168.18   11.60
   9 -10   1  147.49   14.90
   9 -10   1  145.59   11.30
   9 -10   1  140.49   10.50
   9 -10   1  152.48   12.10
   9 -10   1  142.59   12.80
   9 -10   1  144.39   15.30
 -10  10  -1   84.69   11.20
 -10  10  -1   77.89   11.40
 -10  10  -1   80.59   10.80
 -10  10  -1   91.09   14.30
 -10  10  -1   86.09   11.90
 -10  10  -1   76.69    9.50
 -10  10  -1   77.39   13.70
  10 -10   1  102.89   10.00
  10 -10   1   75.89   13.00
  10 -10   1   89.29   10.10
  10 -10   1   99.69   11.60
  10 -10   1   89.29    9.00
  10 -10   1  111.79   14.70
  10 -10   1   76.19   10.10
 -11  10  -1   -3.90    3.70
 -11  10  -1    6.10    6.40
 -11  10  -1    2.80    5.70
 -11  10  -1   -0.70    4.90
 -11  10  -1    1.80    5.40
 -11  10  -1   -0.20    3.90
  11 -10   1   -1.00    3.10
  11 -10   1    2.70    4.90
  11 -10   1    3.40    6.20
  11 -10   1    5.10    4.10
  11 -10   1    1.50    4.10
  11 -10   1    3.30    5.00
 -12  10  -1   31.00    9.40
 -12  10  -1   68.79   12.60
 -12  10  -1   66.59   12.20
 -12  10  -1   75.99   14.00
 -12  10  -1   65.19   13.30
  12 -10   1   65.59    8.60
  12 -10   1   53.99   11.40
  12 -10   1   66.19   12.80
  12 -10   1   74.39   15.00
 -13  10  -1    6.70    6.60
 -13  10  -1   -4.30    4.50
 -13  10  -1    1.50    8.90
 -13  10  -1    8.70    5.70
 -13  10  -1    1.70    5.90
  13 -10   1    5.90    6.80
  13 -10   1    4.60    5.00
  13 -10   1   -9.10    3.30
  13 -10   1    2.60    3.20
  13 -10   1    5.00    7.60
 -14  10  -1  195.48   22.50
 -14  10  -1  199.98   21.60
 -14  10  -1  220.88   19.20
 -14  10  -1  226.38   20.70
  14 -10   1  223.38   22.50
  14 -10   1  202.88   20.40
  14 -10   1  209.28   16.10
  14   9  -1  276.47   22.00
  14   9  -1  274.67   29.40
  14   9  -1  267.27   31.30
  14   9  -1  281.27   22.10
  14   9  -1  248.28   15.70
 -14  -9   1  263.07   24.70
 -14  -9   1  293.17   26.10
 -14  -9   1  282.17   19.40
  13   9  -1   -2.60    3.70
  13   9  -1    2.80    5.10
  13   9  -1    3.20    5.40
  13   9  -1    7.90    3.90
  13   9  -1    6.70    5.90
  13   9  -1    3.80    6.20
 -13  -9   1   13.00    8.20
 -13  -9   1    6.40    6.10
 -13  -9   1    5.30    4.40
 -13  -9   1    8.10    5.70
  12   9  -1  901.01   39.70
  12   9  -1  950.90   45.40
  12   9  -1  888.91   45.20
  12   9  -1  957.90   42.80
  12   9  -1 1006.50   50.09
  12   9  -1  960.90   49.80
 -12  -9   1  973.20   50.29
 -12  -9   1  958.60   49.99
 -12  -9   1  898.71   45.20
 -12  -9   1  950.30   41.90
 -12  -9   1  872.41   43.50
  11   9  -1  186.38   14.60
  11   9  -1  224.18   20.50
  11   9  -1  229.78   17.70
  11   9  -1  193.28   19.20
  11   9  -1  225.78   26.80
  11   9  -1  209.68   15.60
 -11  -9   1  213.68   17.40
 -11  -9   1  212.38   17.50
 -11  -9   1  213.88   15.10
 -11  -9   1  232.38   21.30
  10   9  -1 1080.39   50.39
  10   9  -1  922.31   42.90
  10   9  -1 1048.00   46.50
  10   9  -1 1062.89   50.19
  10   9  -1  966.00   44.00
 -10  -9   1  956.80   37.10
 -10  -9   1  971.20   44.20
 -10  -9   1  982.50   49.40
 -10  -9   1  955.10   37.10
 -10  -9   1  991.90   42.60
 -10  -9   1  988.30   42.00
 -10  -9   1 1091.89   46.60
 -10  -9   1 1010.70   46.10
   9   9  -1  603.44   30.10
   9   9  -1  574.34   28.50
   9   9  -1  620.74   29.30
   9   9  -1  619.84   34.10
   9   9  -1  577.34   30.90
   9   9  -1  690.93   31.90
   9   9  -1  641.24   35.10
   9   9  -1  660.43   30.60
  -9  -9   1  609.54   30.30
  -9  -9   1  595.64   23.70
  -9  -9   1  620.14   27.70
  -9  -9   1  623.54   31.10
  -9  -9   1  659.83   31.10
  -9  -9   1  603.34   28.20
  -9  -9   1  573.14   30.60
  -9  -9   1  634.24   34.30
  -9  -9   1  588.44   23.70
   8   9  -1  223.88   18.50
   8   9  -1  237.78   16.40
   8   9  -1  237.28   14.10
   8   9  -1  234.58   16.00
   8   9  -1  209.98   15.10
   8   9  -1  238.78   18.00
   8   9  -1  249.97   15.20
   8   9  -1  228.98   14.60
  -8  -9   1  237.98   21.60
  -8  -9   1  217.28   17.70
  -8  -9   1  230.08   16.00
  -8  -9   1  225.68   15.70
  -8  -9   1  233.98   13.40
  -8  -9   1  241.88   14.10
  -8  -9   1  238.88   16.10
  -8  -9   1  218.38   17.00
  -8  -9   1  233.48   10.20
  -8  -9   1  225.88   10.40
   7   9  -1  929.71   43.20
   7   9  -1 1003.30   42.70
   7   9  -1 1016.40   43.70
   7   9  -1  994.00   41.80
   7   9  -1 1021.00   47.20
   7   9  -1 1027.90   41.30
   7   9  -1 1031.00   44.00
  -7  -9   1  958.00   42.70
  -7  -9   1  991.70   37.80
  -7  -9   1  977.40   43.30
  -7  -9   1 1009.50   40.50
  -7  -9   1 1091.09   59.89
  -7  -9   1  986.80   43.70
  -7  -9   1 1011.40   40.90
  -7  -9   1 1010.60   44.60
  -7  -9   1  988.90   43.20
   6   9  -1    9.40    3.60
   6   9  -1   14.10    5.30
   6   9  -1   19.20    4.50
   6   9  -1   12.60    4.40
   6   9  -1   18.40    4.60
   6   9  -1   21.30    6.50
   6   9  -1   20.40    4.50
   6   9  -1   10.90    3.70
  -6  -9   1   21.60    5.10
  -6  -9   1   18.70    2.90
  -6  -9   1   11.10    3.70
  -6  -9   1   22.00    6.00
  -6  -9   1    9.00    3.70
  -6  -9   1   19.80    4.60
  -6  -9   1   23.70    5.30
  -6  -9   1   16.20    3.90
   5   9  -1    6.80    4.50
   5   9  -1    6.90    3.20
   5   9  -1    7.00    3.40
   5   9  -1    6.20    3.40
   5   9  -1    2.30    3.00
   5   9  -1    2.60    3.00
   5   9  -1    3.10    1.90
   5   9  -1    3.70    3.10
  -5  -9   1    6.30    1.80
  -5  -9   1    6.70    2.90
  -5  -9   1    1.80    2.40
  -5  -9   1    1.40    2.80
  -5  -9   1    3.40    3.00
  -5  -9   1    6.40    2.80
  -5  -9   1   10.00    4.40
  -5  -9   1    5.80    2.40
   4   9  -1   16.20    4.20
   4   9  -1   15.10    5.20
   4   9  -1   13.80    3.50
   4   9  -1   12.90    3.20
   4   9  -1   12.70    3.90
   4   9  -1   10.80    3.30
   4   9  -1   11.50    3.50
   4   9  -1    7.60    3.30
   4   9  -1    8.60    2.20
  -4  -9   1    7.90    2.50
  -4  -9   1    5.60    2.50
  -4  -9   1   11.70    3.40
  -4  -9   1   12.10    3.00
  -4  -9   1    8.70    3.60
  -4  -9   1   20.10    3.60
  -4  -9   1   19.70    4.80
  -4  -9   1   12.70    3.30
  -4  -9   1   13.80    3.00
   3   9  -1  822.22   36.10
   3   9  -1  739.83   30.90
   3   9  -1  819.72   35.50
   3   9  -1  821.62   33.60
   3   9  -1  833.72   32.80
   3   9  -1  857.51   36.70
   3   9  -1  742.93   34.40
   3   9  -1  848.82   38.60
   3   9  -1  851.71   35.50
  -3  -9   1  809.92   32.50
  -3  -9   1  831.62   32.40
  -3  -9   1  821.62   36.30
  -3  -9   1  825.32   36.40
  -3  -9   1  840.52   34.00
  -3  -9   1  784.42   33.60
  -3  -9   1  822.42   38.10
  -3  -9   1  852.21   35.20
  -3  -9   1  845.62   32.00
   2   9  -1  120.99    9.50
   2   9  -1  100.49    5.70
   2   9  -1  103.49    7.50
   2   9  -1  125.29    8.00
   2   9  -1  119.89    8.60
   2   9  -1  121.99    8.50
   2   9  -1  118.59    9.40
   2   9  -1  116.69    7.80
   2   9  -1  107.89    9.70
   2   9  -1  103.39    8.90
  -2  -9   1  118.79    7.40
  -2  -9   1  116.29    8.50
  -2  -9   1  124.09    6.60
  -2  -9   1  117.49    7.90
  -2  -9   1  106.59    9.90
  -2  -9   1  119.09    7.90
  -2  -9   1  119.09    7.10
  -2  -9   1  120.09    9.60
   1   9  -1 2960.40  108.19
   1   9  -1 2978.60  109.59
   1   9  -1 2977.80  109.79
   1   9  -1 2892.91  109.49
   1   9  -1 3058.39  108.69
   1   9  -1 2898.51  107.29
   1   9  -1 2783.12  107.99
   1   9  -1 2907.81  106.09
   1   9  -1 2840.02  107.29
  -1  -9   1 2982.90  106.99
  -1  -9   1 2897.41  110.59
  -1  -9   1 2872.41  109.79
  -1  -9   1 2925.81  107.49
  -1  -9   1 2874.01  105.59
  -1  -9   1 2780.22  108.39
  -1  -9   1 2856.01  107.39
  -1  -9   1 2874.71  106.19
   0   9  -1   99.29    8.70
   0   9  -1  103.19    7.80
   0   9  -1  116.89    8.90
   0   9  -1  100.49    7.10
   0   9  -1  102.09    8.40
   0   9  -1  107.39    8.20
   0   9  -1  102.59    7.10
   0   9  -1  113.49    8.40
   0  -9   1  107.89    7.60
   0  -9   1  106.49    6.40
   0  -9   1  104.69    7.10
   0  -9   1  100.39    9.50
   0  -9   1  115.49    6.60
   0  -9   1  108.59    7.90
   0  -9   1  102.79    8.70
   0  -9   1  106.39    7.60
   0  -9   1  120.99    9.30
   0  -9   1  108.19    5.80
  -1   9  -1 1572.74   60.89
  -1   9  -1 1524.35   59.29
  -1   9  -1 1546.95   59.79
  -1   9  -1 1537.35   60.59
  -1   9  -1 1565.54   60.49
  -1   9  -1 1456.85   58.29
  -1   9  -1 1539.05   58.69
  -1   9  -1 1636.44   61.29
   1  -9   1 1504.55   57.39
   1  -9   1 1563.94   60.99
   1  -9   1 1520.95   59.49
   1  -9   1 1535.05   59.69
   1  -9   1 1615.74   61.39
   1  -9   1 1507.55   58.49
   1  -9   1 1544.55   56.89
   1  -9   1 1517.05   56.89
   1  -9   1 1628.34   61.89
   1  -9   1 1401.96   59.29
  -2   9  -1  721.23   30.00
  -2   9  -1  753.52   31.20
  -2   9  -1  743.23   32.10
  -2   9  -1  726.13   32.30
  -2   9  -1  688.53   30.40
  -2   9  -1  677.03   31.40
  -2   9  -1  707.23   29.70
  -2   9  -1  746.53   32.10
   2  -9   1  760.42   32.30
   2  -9   1  732.93   29.80
   2  -9   1  743.33   28.20
   2  -9   1  724.03   28.80
   2  -9   1  753.72   32.60
   2  -9   1  772.52   32.60
   2  -9   1  685.93   30.70
   2  -9   1  768.22   31.40
  -3   9  -1 1825.62   69.79
  -3   9  -1 1647.94   68.69
  -3   9  -1 1746.73   70.49
  -3   9  -1 1910.71   71.59
  -3   9  -1 1739.93   70.19
  -3   9  -1 1804.22   70.49
  -3   9  -1 1812.92   70.99
   3  -9   1 1791.72   67.19
   3  -9   1 1859.61   71.29
   3  -9   1 1834.32   70.69
   3  -9   1 1834.52   66.59
   3  -9   1 1843.12   70.19
   3  -9   1 1652.33   69.19
   3  -9   1 1842.42   68.39
   3  -9   1 1852.11   70.99
   3  -9   1 1808.42   66.09
  -4   9  -1  355.26   18.10
  -4   9  -1  354.16   17.70
  -4   9  -1  356.06   19.30
  -4   9  -1  334.17   16.80
  -4   9  -1  324.27   18.20
  -4   9  -1  338.07   19.00
  -4   9  -1  297.57   15.70
  -4   9  -1  351.76   18.50
  -4   9  -1  324.97   16.90
   4  -9   1  318.07   16.10
   4  -9   1  348.17   15.10
   4  -9   1  317.07   21.50
   4  -9   1  326.27   17.40
   4  -9   1  361.36   18.50
   4  -9   1  343.77   18.90
   4  -9   1  334.27   14.80
   4  -9   1  372.46   19.20
   4  -9   1  345.67   15.50
   4  -9   1  337.87   18.00
  -5   9  -1   41.10    6.30
  -5   9  -1   35.90    5.90
  -5   9  -1   43.80    7.30
  -5   9  -1   41.80    8.30
  -5   9  -1   56.09    8.00
  -5   9  -1   40.90    6.20
  -5   9  -1   46.20    5.40
  -5   9  -1   45.90    7.00
   5  -9   1   47.60    5.30
   5  -9   1   44.70    7.00
   5  -9   1   39.70    7.90
   5  -9   1   46.00    6.60
   5  -9   1   47.10    4.90
   5  -9   1   42.20    7.40
   5  -9   1   51.39    7.90
   5  -9   1   51.69    6.10
   5  -9   1   29.00    5.00
   5  -9   1   47.20    6.40
  -6   9  -1   42.90    7.60
  -6   9  -1   53.39    7.70
  -6   9  -1   48.00    9.20
  -6   9  -1   44.70    6.30
  -6   9  -1   41.00    7.20
  -6   9  -1   42.60    7.10
  -6   9  -1   46.80    6.60
  -6   9  -1   43.10    8.90
   6  -9   1   40.20    5.80
   6  -9   1   46.50    6.80
   6  -9   1   35.10    5.00
   6  -9   1   39.30    8.40
   6  -9   1   43.60    5.60
   6  -9   1   41.80    7.10
   6  -9   1   41.70    6.40
   6  -9   1   47.10    7.70
   6  -9   1   45.60    8.50
   6  -9   1   47.60    7.70
  -7   9  -1   68.19   10.30
  -7   9  -1   64.49    7.70
  -7   9  -1   71.49   10.50
  -7   9  -1   46.30    8.50
  -7   9  -1   51.59    7.60
  -7   9  -1   59.29    9.10
  -7   9  -1   59.19    6.90
  -7   9  -1   47.20    7.80
   7  -9   1   61.69    9.70
   7  -9   1   70.89    7.10
   7  -9   1   61.19    8.10
   7  -9   1   51.89    9.30
   7  -9   1   55.99    8.00
   7  -9   1   57.29    6.70
   7  -9   1   52.99    8.00
   7  -9   1   55.79    6.10
  -8   9  -1  248.48   18.90
  -8   9  -1  231.08   15.70
  -8   9  -1  236.98   17.60
  -8   9  -1  247.78   14.80
  -8   9  -1  266.17   18.80
  -8   9  -1  264.27   17.40
  -8   9  -1  252.97   15.90
  -8   9  -1  264.97   15.70
   8  -9   1  234.88   13.30
   8  -9   1  237.88   14.80
   8  -9   1  231.78   15.80
   8  -9   1  253.67   17.80
   8  -9   1  255.17   14.60
   8  -9   1  260.97   14.20
   8  -9   1  241.08   18.10
  -9   9  -1   77.19    8.90
  -9   9  -1   62.69   10.60
  -9   9  -1   75.99   12.10
  -9   9  -1   73.29    8.50
  -9   9  -1   54.29    8.80
  -9   9  -1   57.39   11.90
  -9   9  -1   70.59   10.20
   9  -9   1   69.29    8.50
   9  -9   1   43.30    7.40
   9  -9   1   72.59    9.50
   9  -9   1   61.49    7.40
   9  -9   1   66.59   11.60
   9  -9   1   58.09    8.30
   9  -9   1   68.19   11.10
   9  -9   1   60.69   11.20
   9  -9   1   82.59    8.60
 -10   9  -1  922.61   41.80
 -10   9  -1  793.12   39.10
 -10   9  -1  844.42   42.60
 -10   9  -1  801.52   42.20
 -10   9  -1  847.32   43.80
  10  -9   1  886.71   43.20
  10  -9   1  863.81   36.70
  10  -9   1  864.71   41.40
  10  -9   1  848.02   39.80
  10  -9   1  841.12   36.50
  10  -9   1  830.02   37.60
  10  -9   1  862.51   36.40
 -11   9  -1   66.59   12.10
 -11   9  -1   71.19   13.20
 -11   9  -1   75.29   11.40
 -11   9  -1   66.49   11.30
 -11   9  -1   72.69    5.60
 -11   9  -1   83.79   14.70
  11  -9   1   74.09   14.60
  11  -9   1   74.69    8.90
  11  -9   1   91.69   10.30
  11  -9   1   79.19    8.50
  11  -9   1   87.79   11.70
  11  -9   1   57.09   12.70
 -12   9  -1  523.15   33.10
 -12   9  -1  529.15   21.50
 -12   9  -1  478.05   31.30
 -12   9  -1  521.45   31.80
 -12   9  -1  489.45   29.80
 -12   9  -1  420.26   30.20
  12  -9   1  523.55   28.90
  12  -9   1  491.45   23.70
  12  -9   1  524.65   32.50
  12  -9   1  496.35   28.00
  12  -9   1  526.15   30.20
 -13   9  -1  114.69   14.10
 -13   9  -1  137.39   17.70
 -13   9  -1  128.79    8.60
 -13   9  -1  144.99   17.70
 -13   9  -1  153.48   17.70
  13  -9   1  130.49   16.40
  13  -9   1  151.98   18.60
  13  -9   1  132.69   14.80
  13  -9   1  122.99   12.40
  13  -9   1  122.39    9.90
 -14   9  -1  133.39   18.70
 -14   9  -1  115.49   15.10
 -14   9  -1  135.09   24.10
 -14   9  -1  122.59   18.10
 -14   9  -1  113.29   25.90
  14  -9   1  147.79   13.40
  14  -9   1  116.19   16.20
  14  -9   1  138.69   19.80
  15   8  -1  195.48   19.50
  15   8  -1  117.09   21.50
  15   8  -1  224.38   23.70
  15   8  -1  193.88   17.10
  15   8  -1  167.48   11.90
 -15  -8   1  169.18   18.60
 -15  -8   1  166.38   21.60
 -15  -8   1  170.98   16.50
  14   8  -1  387.86   29.50
  14   8  -1  382.36   23.50
  14   8  -1  362.26   19.20
  14   8  -1  371.76   25.70
  14   8  -1  355.86   25.90
 -14  -8   1  389.36   26.40
 -14  -8   1  414.36   23.70
 -14  -8   1  375.66   25.90
 -14  -8   1  374.26   30.00
  13   8  -1  404.26   20.30
  13   8  -1  431.46   24.00
  13   8  -1  392.06   26.60
  13   8  -1  440.66   26.70
  13   8  -1  423.56   29.90
 -13  -8   1  416.56   23.40
 -13  -8   1  413.46   26.40
 -13  -8   1  388.36   17.00
 -13  -8   1  418.76   26.80
 -13  -8   1  377.86   17.10
 -13  -8   1  393.66   19.90
  12   8  -1   95.29   13.20
  12   8  -1  131.39   16.70
  12   8  -1  106.79   15.60
  12   8  -1  104.79    9.40
  12   8  -1  105.79   11.90
  12   8  -1  113.29   13.60
 -12  -8   1  107.79   13.70
 -12  -8   1  102.99    6.50
 -12  -8   1   99.59    6.60
 -12  -8   1   96.59   13.90
 -12  -8   1  102.69   11.70
 -12  -8   1   91.29    7.40
 -12  -8   1   96.19   16.80
 -12  -8   1   99.09   10.20
  11   8  -1  297.47   22.20
  11   8  -1  291.27   18.00
  11   8  -1  292.37   20.50
  11   8  -1  296.37   23.40
  11   8  -1  291.17   18.00
  11   8  -1  255.07   21.70
  11   8  -1  268.27   17.30
 -11  -8   1  273.87   12.60
 -11  -8   1  272.47   19.70
 -11  -8   1  260.67   13.00
 -11  -8   1  263.97   19.50
 -11  -8   1  305.67   23.60
 -11  -8   1  287.47   17.60
 -11  -8   1  271.47   12.50
  10   8  -1    6.90    3.00
  10   8  -1   21.40   10.80
  10   8  -1    8.50    4.30
  10   8  -1    7.80    3.60
  10   8  -1    6.00    4.80
  10   8  -1   15.70    5.90
  10   8  -1    9.20    4.80
  10   8  -1   11.80    4.80
 -10  -8   1   17.90    5.80
 -10  -8   1    8.60    2.00
 -10  -8   1    6.90    5.50
 -10  -8   1   13.10    4.20
 -10  -8   1    6.50    2.10
 -10  -8   1    1.30    3.60
 -10  -8   1   13.20    4.60
 -10  -8   1    9.00    2.00
   9   8  -1   80.29   11.50
   9   8  -1   62.49    9.80
   9   8  -1   70.89   11.70
   9   8  -1   80.49    9.00
   9   8  -1   76.19    9.80
   9   8  -1   56.39    7.90
   9   8  -1   57.99    8.30
  -9  -8   1   66.69    9.90
  -9  -8   1   90.09   12.50
  -9  -8   1   66.69    4.80
  -9  -8   1   65.09    4.90
  -9  -8   1   72.79   10.30
  -9  -8   1   70.09    8.30
  -9  -8   1   53.99    9.30
  -9  -8   1   65.39    7.40
  -9  -8   1   72.89    8.50
  -9  -8   1   63.79    9.10
   8   8  -1   65.99    7.90
   8   8  -1   74.89    9.70
   8   8  -1   62.69    7.30
   8   8  -1   79.89    8.70
   8   8  -1   75.39   11.40
   8   8  -1   62.49    8.10
   8   8  -1   71.69    9.10
   8   8  -1   69.29   10.00
  -8  -8   1   79.69    9.80
  -8  -8   1   68.69    8.10
  -8  -8   1   67.89   11.00
  -8  -8   1   68.39    7.70
  -8  -8   1   65.59    4.60
  -8  -8   1   67.79    4.90
  -8  -8   1   74.19    9.20
  -8  -8   1   67.79    6.90
  -8  -8   1   75.79    8.80
  -8  -8   1   78.99    9.50
  -8  -8   1   66.69    7.80
   7   8  -1 1207.08   50.79
   7   8  -1 1155.68   48.70
   7   8  -1 1189.48   50.99
   7   8  -1 1188.38   49.80
   7   8  -1 1269.97   51.39
   7   8  -1 1276.07   49.40
   7   8  -1 1194.18   53.49
   7   8  -1 1277.87   54.49
  -7  -8   1 1247.58   50.99
  -7  -8   1 1226.38   48.40
  -7  -8   1 1179.68   48.50
  -7  -8   1 1305.97   55.29
  -7  -8   1 1213.88   48.10
  -7  -8   1 1155.48   51.59
  -7  -8   1 1193.38   45.50
  -7  -8   1 1163.78   50.29
  -7  -8   1 1238.58   50.99
  -7  -8   1 1267.87   51.09
   6   8  -1   10.60    3.60
   6   8  -1    5.70    3.30
   6   8  -1    8.40    3.90
   6   8  -1    4.30    2.20
   6   8  -1    3.20    2.40
   6   8  -1    9.40    3.40
   6   8  -1    5.70    3.90
   6   8  -1    9.10    3.90
  -6  -8   1    8.90    3.20
  -6  -8   1    6.00    3.20
  -6  -8   1    5.70    2.20
  -6  -8   1   10.30    4.50
  -6  -8   1    8.30    3.30
  -6  -8   1    9.10    3.30
  -6  -8   1    6.30    1.60
  -6  -8   1    9.40    2.50
  -6  -8   1    6.40    3.10
  -6  -8   1    4.50    3.10
   5   8  -1 2493.25   91.49
   5   8  -1 2353.86   94.19
   5   8  -1 2542.75   95.59
   5   8  -1 2451.75   92.29
   5   8  -1 2432.96   92.29
   5   8  -1 2343.17   92.89
   5   8  -1 2349.56   89.69
   5   8  -1 2444.26   90.69
  -5  -8   1 2420.66   92.99
  -5  -8   1 2384.86   88.19
  -5  -8   1 2475.85   94.69
  -5  -8   1 2309.37   91.29
  -5  -8   1 2425.66   90.09
  -5  -8   1 2330.57   91.89
  -5  -8   1 2413.86   89.49
  -5  -8   1 2394.36   92.89
  -5  -8   1 2400.96   91.79
   4   8  -1  404.26   21.30
   4   8  -1  475.85   20.90
   4   8  -1  467.15   22.90
   4   8  -1  501.05   22.30
   4   8  -1  436.26   22.90
   4   8  -1  492.35   19.80
   4   8  -1  499.05   24.50
  -4  -8   1  475.45   22.50
  -4  -8   1  476.35   21.60
  -4  -8   1  461.55   20.20
  -4  -8   1  457.15   21.70
  -4  -8   1  468.45   23.60
  -4  -8   1  464.55   19.10
  -4  -8   1  479.85   19.80
  -4  -8   1  470.75   21.30
  -4  -8   1  456.55   22.90
   3   8  -1 2498.05   93.89
   3   8  -1 2503.25   90.99
   3   8  -1 2634.94   89.39
   3   8  -1 2353.26   91.19
   3   8  -1 2484.25   92.99
   3   8  -1 2528.85   90.19
   3   8  -1 2366.26   93.39
   3   8  -1 2257.77   91.99
  -3  -8   1 2398.96   91.89
  -3  -8   1 2476.25   89.89
  -3  -8   1 2417.36   91.79
  -3  -8   1 2471.65   92.59
  -3  -8   1 2420.36   93.89
  -3  -8   1 2460.65   93.79
  -3  -8   1 2439.66   91.39
  -3  -8   1 2428.76   89.79
  -3  -8   1 2393.36   90.29
   2   8  -1 1763.62   67.69
   2   8  -1 1734.83   65.69
   2   8  -1 1471.15   62.29
   2   8  -1 1770.62   64.59
   2   8  -1 1653.13   64.69
   2   8  -1 1767.02   66.79
   2   8  -1 1773.02   64.69
   2   8  -1 1833.72   67.19
   2   8  -1 1715.43   66.49
   2   8  -1 1641.24   65.29
  -2  -8   1 1693.43   64.89
  -2  -8   1 1748.82   64.89
  -2  -8   1 1715.93   63.39
  -2  -8   1 1742.03   67.19
  -2  -8   1 1693.33   63.79
  -2  -8   1 1732.03   67.49
  -2  -8   1 1688.03   66.29
  -2  -8   1 1722.93   64.19
   1   8  -1 1093.59   42.80
   1   8  -1 1068.29   43.80
   1   8  -1 1067.29   41.40
   1   8  -1 1028.10   40.70
   1   8  -1 1037.40   40.80
   1   8  -1 1049.20   41.70
   1   8  -1  998.60   41.40
   1   8  -1 1044.00   43.00
  -1  -8   1 1073.39   42.00
  -1  -8   1 1051.99   40.90
  -1  -8   1 1055.59   39.50
  -1  -8   1 1040.50   42.90
  -1  -8   1 1025.90   39.90
  -1  -8   1 1047.40   41.00
  -1  -8   1 1092.59   40.70
  -1  -8   1 1053.49   43.60
   0   8  -1  337.27   16.10
   0   8  -1  340.67   16.00
   0   8  -1  308.97   15.40
   0   8  -1  360.46   16.80
   0   8  -1  316.07   21.40
   0   8  -1  338.17   15.00
   0   8  -1  321.37   14.90
   0   8  -1  312.17   17.90
   0  -8   1  339.47   16.90
   0  -8   1  355.96   17.20
   0  -8   1  312.37   17.20
   0  -8   1  340.97   14.30
   0  -8   1  328.97   14.20
   0  -8   1  342.77   15.60
   0  -8   1  291.17   15.90
   0  -8   1  358.76   15.50
   0  -8   1  331.57   15.80
  -1   8  -1    6.50    2.10
  -1   8  -1    3.00    2.20
  -1   8  -1    7.10    2.40
  -1   8  -1    6.80    2.10
  -1   8  -1    9.70    3.10
  -1   8  -1    6.30    2.70
  -1   8  -1    3.80    1.90
   1  -8   1    6.50    2.20
   1  -8   1    6.50    2.50
   1  -8   1    6.90    2.20
   1  -8   1    7.70    1.90
   1  -8   1    7.50    1.60
   1  -8   1    2.70    1.80
   1  -8   1    4.20    2.40
   1  -8   1    5.70    1.80
   1  -8   1   12.40    3.20
   1  -8   1    6.30    1.40
  -2   8  -1  208.48   10.40
  -2   8  -1  190.78   10.80
  -2   8  -1  211.98   11.60
  -2   8  -1  201.38   12.10
  -2   8  -1  201.58   11.90
  -2   8  -1  196.58   11.80
  -2   8  -1  221.88   10.80
  -2   8  -1  204.98   12.30
   2  -8   1  221.78   12.70
   2  -8   1  202.48   11.50
   2  -8   1  181.48    8.30
   2  -8   1  199.78    9.70
   2  -8   1  202.48   11.50
   2  -8   1  197.58   12.40
   2  -8   1  203.68   12.10
   2  -8   1  200.48   10.40
   2  -8   1  202.68    9.20
  -3   8  -1   17.10    3.50
  -3   8  -1   21.20    4.80
  -3   8  -1   16.30    3.20
  -3   8  -1   29.30    4.70
  -3   8  -1   15.30    3.10
  -3   8  -1   15.60    3.90
  -3   8  -1    9.70    2.70
  -3   8  -1   10.50    3.10
  -3   8  -1   20.30    4.90
   3  -8   1   11.80    2.60
   3  -8   1   15.80    2.70
   3  -8   1   12.00    3.00
   3  -8   1    8.60    2.50
   3  -8   1   14.10    2.70
   3  -8   1   12.60    3.50
   3  -8   1   10.10    3.00
   3  -8   1   13.10    2.60
   3  -8   1   13.40    3.50
  -4   8  -1  964.50   43.00
  -4   8  -1  822.32   36.70
  -4   8  -1  931.41   35.30
  -4   8  -1  882.51   38.60
  -4   8  -1  906.61   37.80
  -4   8  -1  955.40   39.40
  -4   8  -1  880.71   38.30
  -4   8  -1  810.52   37.20
  -4   8  -1  891.01   39.10
  -4   8  -1  961.80   37.90
   4  -8   1  957.90   35.40
   4  -8   1  857.01   36.30
   4  -8   1  926.51   38.90
   4  -8   1  936.71   38.30
   4  -8   1  910.81   35.10
   4  -8   1  946.31   39.20
   4  -8   1  912.71   37.40
   4  -8   1  870.01   37.70
   4  -8   1  955.80   38.10
   4  -8   1  904.91   35.70
  -5   8  -1   18.20    4.50
  -5   8  -1   27.30    5.60
  -5   8  -1   18.70    3.90
  -5   8  -1   27.00    4.50
  -5   8  -1   27.80    5.10
  -5   8  -1   26.10    5.40
  -5   8  -1   24.50    5.30
  -5   8  -1   20.30    3.60
  -5   8  -1   24.60    5.30
   5  -8   1   23.40    4.30
   5  -8   1   26.80    5.10
   5  -8   1   28.00    4.30
   5  -8   1   22.80    5.30
   5  -8   1   28.90    5.50
   5  -8   1   20.70    4.20
   5  -8   1   13.10    3.40
   5  -8   1   25.00    5.90
   5  -8   1   24.20    4.80
   5  -8   1   19.50    3.70
  -6   8  -1 1999.80   77.69
  -6   8  -1 2053.09   78.89
  -6   8  -1 2058.89   78.09
  -6   8  -1 2086.19   80.39
  -6   8  -1 2035.80   76.39
  -6   8  -1 1886.61   79.29
  -6   8  -1 2138.29   81.29
  -6   8  -1 1947.51   76.49
   6  -8   1 2025.40   76.19
   6  -8   1 2004.00   78.79
   6  -8   1 2067.29   80.39
   6  -8   1 2021.30   79.59
   6  -8   1 1999.60   78.99
   6  -8   1 2036.30   77.29
   6  -8   1 1991.40   75.89
   6  -8   1 1995.00   75.39
   6  -8   1 1963.90   77.99
   6  -8   1 1896.31   76.79
  -7   8  -1  617.54   31.40
  -7   8  -1  613.24   30.40
  -7   8  -1  612.24   28.70
  -7   8  -1  608.54   27.20
  -7   8  -1  638.74   27.50
  -7   8  -1  636.74   29.60
  -7   8  -1  626.84   30.80
  -7   8  -1  588.14   27.80
  -7   8  -1  611.94   28.00
   7  -8   1  633.94   26.60
   7  -8   1  623.04   26.20
   7  -8   1  620.94   27.00
   7  -8   1  583.24   28.40
   7  -8   1  615.74   27.40
   7  -8   1  606.94   30.70
   7  -8   1  628.04   30.20
   7  -8   1  590.94   29.50
   7  -8   1  583.54   29.00
   7  -8   1  605.54   27.70
  -8   8  -1 1302.87   53.99
  -8   8  -1 1159.18   53.19
  -8   8  -1 1232.58   50.49
  -8   8  -1 1128.89   50.69
  -8   8  -1 1197.38   50.19
  -8   8  -1 1227.48   45.50
  -8   8  -1 1266.17   52.29
  -8   8  -1 1242.08   54.59
  -8   8  -1 1185.48   49.90
  -8   8  -1 1124.69   49.20
   8  -8   1 1194.98   50.09
   8  -8   1 1255.27   52.69
   8  -8   1 1270.87   49.30
   8  -8   1 1232.88   49.40
   8  -8   1 1268.47   48.90
   8  -8   1 1188.88   51.09
   8  -8   1 1260.87   54.09
   8  -8   1 1237.88   48.30
   8  -8   1 1189.48   52.49
  -9   8  -1  280.97   18.20
  -9   8  -1  252.07   15.70
  -9   8  -1  276.17   20.10
  -9   8  -1  254.57   16.40
  -9   8  -1  243.58   18.40
  -9   8  -1  255.27   16.30
  -9   8  -1  243.48   16.50
  -9   8  -1  273.07   19.40
  -9   8  -1  254.77   12.10
   9  -8   1  247.48   15.50
   9  -8   1  260.07   14.50
   9  -8   1  278.67   16.70
   9  -8   1  298.37   17.70
   9  -8   1  263.67   19.60
   9  -8   1  261.07   18.40
   9  -8   1  281.77   15.10
   9  -8   1  263.67   14.90
 -10   8  -1  273.97   21.20
 -10   8  -1  273.17   18.90
 -10   8  -1  244.98   17.10
 -10   8  -1  241.88   12.30
 -10   8  -1  254.77   16.00
 -10   8  -1  252.37   16.80
 -10   8  -1  236.48   16.80
 -10   8  -1  244.68   15.40
 -10   8  -1  257.17   25.40
 -10   8  -1  254.97   19.60
  10  -8   1  233.38   19.50
  10  -8   1  256.97   21.30
  10  -8   1  272.57   15.50
  10  -8   1  232.98   15.70
  10  -8   1  265.47   14.80
  10  -8   1  268.77   17.70
  10  -8   1  251.07   14.60
  10  -8   1  238.08   16.40
 -11   8  -1  196.48   15.80
 -11   8  -1  202.28   18.20
 -11   8  -1  206.08   16.30
 -11   8  -1  222.28   16.30
 -11   8  -1  209.88   17.70
 -11   8  -1  209.18   18.50
 -11   8  -1  228.18   20.40
 -11   8  -1  175.28   11.20
  11  -8   1  220.08   18.30
  11  -8   1  251.87   20.20
  11  -8   1  233.08   17.00
  11  -8   1  220.18   14.00
  11  -8   1  215.48   13.10
  11  -8   1  212.28   14.30
 -12   8  -1   11.70    3.60
 -12   8  -1   18.50    7.20
 -12   8  -1   33.80    9.40
 -12   8  -1    8.10    5.90
 -12   8  -1   19.10    7.20
 -12   8  -1   15.20    5.40
 -12   8  -1   20.40    6.80
  12  -8   1   24.70    6.00
  12  -8   1   23.10    6.70
  12  -8   1   14.60    6.00
  12  -8   1   28.40    8.70
  12  -8   1   16.00    3.80
 -13   8  -1   51.29   14.60
 -13   8  -1   19.30    6.60
 -13   8  -1   34.20    6.50
 -13   8  -1   40.70   10.00
 -13   8  -1   38.40    9.20
 -13   8  -1   37.00    8.80
 -13   8  -1   29.50    8.20
  13  -8   1   61.79   14.70
  13  -8   1   57.09   12.90
  13  -8   1   38.70    6.80
  13  -8   1   52.79    9.50
 -14   8  -1   12.20    6.90
 -14   8  -1   17.80    6.30
 -14   8  -1   19.80    7.50
 -14   8  -1    5.60    6.50
 -14   8  -1   12.40    3.60
 -14   8  -1   21.00   12.80
  14  -8   1   11.90    8.70
  14  -8   1   12.20    8.10
  14  -8   1   15.10    6.20
  14  -8   1    2.20    4.80
 -15   8  -1   57.69   13.60
 -15   8  -1   92.09   15.90
 -15   8  -1   55.89    8.30
 -15   8  -1  108.39   16.20
  15  -8   1   66.29   11.30
  15  -8   1  113.69   16.60
  15  -8   1  103.19   19.30
  15   7  -1   27.90    6.20
  15   7  -1   27.30    9.00
  15   7  -1   25.40    6.90
  15   7  -1   19.80    7.40
  15   7  -1   32.20    9.00
 -15  -7   1   27.70    8.10
 -15  -7   1   17.30    6.20
 -15  -7   1   24.20    9.80
 -15  -7   1   25.90    9.20
  14   7  -1   16.90    7.30
  14   7  -1   21.00    9.10
  14   7  -1   19.30    4.30
  14   7  -1   34.20    8.50
  14   7  -1   36.70    8.30
 -14  -7   1   20.90    3.80
 -14  -7   1    8.30    7.60
 -14  -7   1   23.80    6.70
 -14  -7   1   28.20    8.70
 -14  -7   1   24.10    7.10
  13   7  -1   96.49   11.30
  13   7  -1   56.99   11.70
  13   7  -1   42.30    8.20
  13   7  -1   59.29    7.30
  13   7  -1   58.59   11.60
  13   7  -1   79.19   14.70
 -13  -7   1   83.99   20.80
 -13  -7   1   84.09   11.10
 -13  -7   1   86.49   13.00
 -13  -7   1   54.69    6.20
 -13  -7   1   77.69   12.10
  12   7  -1   15.90    7.50
  12   7  -1   12.90    3.60
  12   7  -1   17.60    6.40
  12   7  -1   11.60    5.20
  12   7  -1    7.90    3.70
  12   7  -1   26.40    7.80
  12   7  -1   14.30    5.40
 -12  -7   1   14.30    5.50
 -12  -7   1    8.00    4.40
 -12  -7   1   11.60    6.00
 -12  -7   1   23.90    9.20
 -12  -7   1   10.80    4.20
 -12  -7   1   12.10    2.90
  11   7  -1  912.71   44.10
  11   7  -1  901.91   40.50
  11   7  -1  950.70   43.60
  11   7  -1  991.90   48.00
  11   7  -1  946.61   47.80
  11   7  -1  951.50   41.70
  11   7  -1  869.81   41.10
  11   7  -1  958.50   38.60
 -11  -7   1  972.00   44.20
 -11  -7   1  888.21   41.40
 -11  -7   1  900.81   40.60
 -11  -7   1  927.31   43.50
 -11  -7   1  964.10   48.00
 -11  -7   1  891.71   36.40
  10   7  -1   55.49    8.00
  10   7  -1   51.89    7.50
  10   7  -1   47.30    9.80
  10   7  -1   34.90    7.90
  10   7  -1   55.89    9.70
  10   7  -1   58.79    9.50
  10   7  -1   54.19    8.70
  10   7  -1   54.99    8.60
 -10  -7   1   51.69    4.90
 -10  -7   1   71.89    9.80
 -10  -7   1   53.19   10.80
 -10  -7   1   53.99    9.90
 -10  -7   1   56.19    5.10
 -10  -7   1   53.89    8.70
 -10  -7   1   59.79    8.30
 -10  -7   1   53.99    6.90
   9   7  -1 1649.63   69.19
   9   7  -1 1852.61   75.59
   9   7  -1 1877.01   72.79
   9   7  -1 1843.52   71.89
   9   7  -1 1764.52   69.99
   9   7  -1 1721.13   69.19
   9   7  -1 1804.52   75.59
   9   7  -1 1706.53   70.19
  -9  -7   1 1843.22   75.59
  -9  -7   1 1711.63   69.39
  -9  -7   1 1732.13   65.39
  -9  -7   1 1768.42   71.59
  -9  -7   1 1732.03   68.59
  -9  -7   1 1689.33   65.39
  -9  -7   1 1796.02   69.19
  -9  -7   1 1754.02   69.99
  -9  -7   1 1794.22   71.79
  -9  -7   1 1640.94   71.09
   8   7  -1  386.66   23.30
   8   7  -1  397.66   20.60
   8   7  -1  366.86   20.30
   8   7  -1  371.16   18.60
   8   7  -1  336.87   18.70
   8   7  -1  356.66   19.00
   8   7  -1  319.77   17.70
   8   7  -1  310.87   21.30
  -8  -7   1  348.87   19.10
  -8  -7   1  342.87   18.10
  -8  -7   1  344.17   14.90
  -8  -7   1  360.46   19.90
  -8  -7   1  353.16   15.10
  -8  -7   1  380.96   20.30
  -8  -7   1  350.46   22.40
  -8  -7   1  333.87   17.30
  -8  -7   1  328.37   20.20
  -8  -7   1  352.46   14.70
  -8  -7   1  344.47   17.90
  -8  -7   1  331.77   19.30
   7   7  -1 1493.35   57.69
   7   7  -1 1487.85   59.09
   7   7  -1 1481.65   59.49
   7   7  -1 1483.15   58.59
   7   7  -1 1368.36   61.69
   7   7  -1 1562.04   63.09
   7   7  -1 1342.17   59.09
   7   7  -1 1571.84   57.89
  -7  -7   1 1446.46   58.99
  -7  -7   1 1461.25   53.69
  -7  -7   1 1354.26   59.89
  -7  -7   1 1491.45   59.29
  -7  -7   1 1519.25   62.49
  -7  -7   1 1476.05   57.19
  -7  -7   1 1487.05   59.09
  -7  -7   1 1460.85   59.39
  -7  -7   1 1440.46   57.19
  -7  -7   1 1421.36   56.79
  -7  -7   1 1475.55   54.39
   6   7  -1 1141.39   47.60
   6   7  -1 1208.38   49.80
   6   7  -1 1271.57   49.10
   6   7  -1 1280.57   48.40
   6   7  -1 1269.47   52.89
   6   7  -1 1213.98   52.09
   6   7  -1 1178.98   49.80
   6   7  -1 1165.68   49.60
  -6  -7   1 1189.28   49.20
  -6  -7   1 1208.28   49.70
  -6  -7   1 1241.48   45.40
  -6  -7   1 1222.08   47.90
  -6  -7   1 1207.18   47.30
  -6  -7   1 1198.98   49.60
  -6  -7   1 1187.28   50.49
  -6  -7   1 1209.48   49.50
  -6  -7   1 1229.88   47.50
  -6  -7   1 1274.67   52.59
   5   7  -1  486.25   21.20
   5   7  -1  464.55   22.60
   5   7  -1  490.05   21.70
   5   7  -1  488.95   22.60
   5   7  -1  477.25   20.60
   5   7  -1  493.55   24.90
   5   7  -1  427.56   21.90
   5   7  -1  506.85   24.50
  -5  -7   1  481.95   18.90
  -5  -7   1  471.85   23.30
  -5  -7   1  485.75   20.40
  -5  -7   1  471.95   24.20
  -5  -7   1  446.96   20.60
  -5  -7   1  460.35   22.20
  -5  -7   1  483.95   22.20
  -5  -7   1  447.56   21.60
  -5  -7   1  498.65   23.10
  -5  -7   1  452.15   20.10
   4   7  -1  106.09    9.80
   4   7  -1  104.69    7.30
   4   7  -1   94.79    7.00
   4   7  -1  107.19    6.40
   4   7  -1   95.09    7.80
   4   7  -1  118.09    9.30
   4   7  -1  108.79    9.50
   4   7  -1   84.39    7.30
  -4  -7   1  101.89    7.80
  -4  -7   1   95.99    7.30
  -4  -7   1  101.69    9.10
  -4  -7   1   94.99    5.90
  -4  -7   1   97.59    6.20
  -4  -7   1   94.69    5.50
  -4  -7   1   94.29    7.70
  -4  -7   1   97.19    8.40
  -4  -7   1   78.69    7.40
  -4  -7   1   87.79    6.50
   3   7  -1  181.18   11.00
   3   7  -1  163.28    8.00
   3   7  -1  157.58   10.70
   3   7  -1  165.58    9.10
   3   7  -1  171.88   10.00
   3   7  -1  165.48    9.20
   3   7  -1  135.99    9.40
  -3  -7   1  156.98    9.70
  -3  -7   1  155.28   10.70
  -3  -7   1  166.18   10.00
  -3  -7   1  157.88    8.60
  -3  -7   1  158.68    8.00
  -3  -7   1  165.38    9.50
  -3  -7   1  180.08   13.70
  -3  -7   1  166.78    8.20
  -3  -7   1  169.38   11.10
   2   7  -1  529.55   21.10
   2   7  -1  443.66   19.20
   2   7  -1  545.05   21.30
   2   7  -1  526.55   22.90
   2   7  -1  493.75   21.80
   2   7  -1  537.45   23.00
   2   7  -1  509.25   21.30
   2   7  -1  512.75   23.40
   2   7  -1  486.95   22.80
   2   7  -1  464.45   19.40
  -2  -7   1  520.35   20.30
  -2  -7   1  521.35   21.50
  -2  -7   1  514.65   20.70
  -2  -7   1  509.75   22.30
  -2  -7   1  507.85   21.50
  -2  -7   1  526.25   29.90
  -2  -7   1  524.55   20.80
  -2  -7   1  515.15   23.30
   1   7  -1   21.00    3.80
   1   7  -1   30.60    4.10
   1   7  -1   25.70    3.60
   1   7  -1   26.00    3.40
   1   7  -1   23.10    3.70
   1   7  -1   27.60    4.50
   1   7  -1   25.30    4.60
   1   7  -1   28.40    3.40
   1   7  -1   26.00    4.30
  -1  -7   1   23.20    3.30
  -1  -7   1   24.60    3.60
  -1  -7   1   26.30    5.00
  -1  -7   1   28.40    3.40
  -1  -7   1   27.00    4.30
  -1  -7   1   28.80    2.80
  -1  -7   1   27.20    3.40
  -1  -7   1   26.80    3.10
   0   7  -1 2341.67   84.69
   0   7  -1 2279.47   85.39
   0   7  -1 2335.77   84.59
   0   7  -1 2016.70   84.79
   0   7  -1 2224.48   83.59
   0   7  -1 2355.86   85.49
   0   7  -1 2323.27   83.59
   0   7  -1 2268.77   84.19
   0  -7   1 2308.67   84.29
   0  -7   1 2407.56   85.79
   0  -7   1 2165.38   84.49
   0  -7   1 2389.56   85.69
   0  -7   1 2200.18   82.89
   0  -7   1 2136.89   85.79
   0  -7   1 2342.17   83.19
   0  -7   1 2201.28   83.69
  -1   7  -1    0.50    1.40
  -1   7  -1    0.00    1.40
  -1   7  -1    1.20    1.60
  -1   7  -1    2.10    1.90
  -1   7  -1    1.30    1.60
  -1   7  -1    0.70    1.50
  -1   7  -1    0.00    1.30
  -1   7  -1    0.70    1.60
   1  -7   1    1.20    1.80
   1  -7   1   -0.80    1.20
   1  -7   1    3.00    1.60
   1  -7   1    2.20    1.80
   1  -7   1    2.70    2.10
   1  -7   1    0.80    1.10
   1  -7   1    2.80    1.60
   1  -7   1    1.00    1.20
   1  -7   1    1.10    0.90
  -2   7  -1 2005.20   77.69
  -2   7  -1 2102.09   77.99
  -2   7  -1 2147.99   75.99
  -2   7  -1 2046.80   77.79
  -2   7  -1 1896.21   77.19
  -2   7  -1 2000.00   76.39
  -2   7  -1 2128.99   78.69
  -2   7  -1 2023.40   75.69
   2  -7   1 2083.89   77.69
   2  -7   1 2089.19   77.29
   2  -7   1 1990.90   75.89
   2  -7   1 2009.10   76.89
   2  -7   1 2089.09   74.29
   2  -7   1 1835.32   78.99
   2  -7   1 2090.99   75.29
   2  -7   1 2142.99   78.09
   2  -7   1 2060.09   74.69
  -3   7  -1  626.04   27.50
  -3   7  -1  641.74   24.20
  -3   7  -1  630.14   27.90
  -3   7  -1  658.03   26.60
  -3   7  -1  579.04   28.60
  -3   7  -1  625.54   27.00
  -3   7  -1  572.14   24.90
  -3   7  -1  624.54   25.50
  -3   7  -1  576.64   26.40
  -3   7  -1  584.74   25.80
   3  -7   1  634.04   27.40
   3  -7   1  629.94   26.50
   3  -7   1  630.94   29.70
   3  -7   1  598.94   26.60
   3  -7   1  636.74   24.40
   3  -7   1  639.24   24.30
   3  -7   1  611.24   24.80
   3  -7   1  634.24   26.90
   3  -7   1  634.04   27.50
  -4   7  -1 1351.06   56.49
  -4   7  -1 1528.55   55.79
  -4   7  -1 1340.77   54.09
  -4   7  -1 1460.75   54.79
  -4   7  -1 1442.76   56.99
  -4   7  -1 1453.45   56.59
  -4   7  -1 1417.46   55.69
  -4   7  -1 1274.97   54.79
  -4   7  -1 1498.35   57.39
  -4   7  -1 1461.65   53.79
   4  -7   1 1408.36   55.89
   4  -7   1 1432.56   55.69
   4  -7   1 1442.76   56.89
   4  -7   1 1411.26   53.89
   4  -7   1 1474.45   57.09
   4  -7   1 1436.86   55.49
   4  -7   1 1444.36   53.79
   4  -7   1 1426.96   56.19
   4  -7   1 1449.76   53.39
   4  -7   1 1345.07   54.39
  -5   7  -1 1407.56   55.99
  -5   7  -1 1421.76   53.69
  -5   7  -1 1392.96   54.29
  -5   7  -1 1400.96   53.09
  -5   7  -1 1388.46   55.49
  -5   7  -1 1173.38   52.89
  -5   7  -1 1338.37   52.19
  -5   7  -1 1362.76   53.69
  -5   7  -1 1294.87   54.69
   5  -7   1 1386.26   55.19
   5  -7   1 1325.67   51.99
   5  -7   1 1466.65   55.79
   5  -7   1 1386.26   51.59
   5  -7   1 1366.96   54.49
   5  -7   1 1364.76   53.79
   5  -7   1 1319.77   52.79
   5  -7   1 1342.77   53.29
   5  -7   1 1348.37   54.29
   5  -7   1 1362.06   52.19
  -6   7  -1  565.14   28.30
  -6   7  -1  592.84   26.60
  -6   7  -1  642.14   27.90
  -6   7  -1  617.34   29.50
  -6   7  -1  576.04   26.30
  -6   7  -1  601.14   28.80
  -6   7  -1  562.34   26.70
  -6   7  -1  593.64   26.00
  -6   7  -1  611.34   26.00
   6  -7   1  595.44   26.20
   6  -7   1  600.74   28.30
   6  -7   1  571.74   26.10
   6  -7   1  600.34   25.70
   6  -7   1  618.24   28.20
   6  -7   1  608.84   25.00
   6  -7   1  649.54   29.20
   6  -7   1  578.84   27.50
   6  -7   1  652.53   29.40
   6  -7   1  570.24   26.90
  -7   7  -1  621.24   31.90
  -7   7  -1  687.33   29.30
  -7   7  -1  661.23   31.00
  -7   7  -1  700.73   33.30
  -7   7  -1  684.93   32.30
  -7   7  -1  641.64   29.40
  -7   7  -1  628.04   30.10
  -7   7  -1  671.93   29.80
  -7   7  -1  672.43   29.90
   7  -7   1  710.83   32.00
   7  -7   1  672.43   29.70
   7  -7   1  657.33   28.90
   7  -7   1  679.43   31.70
   7  -7   1  716.93   30.10
   7  -7   1  742.23   33.30
   7  -7   1  660.63   29.10
   7  -7   1  638.54   30.30
   7  -7   1  703.83   28.80
   7  -7   1  664.83   31.10
  -8   7  -1    5.60    4.20
  -8   7  -1    3.30    2.20
  -8   7  -1    1.80    3.30
  -8   7  -1    1.20    2.80
  -8   7  -1    2.10    2.60
  -8   7  -1    2.10    2.90
  -8   7  -1    3.90    4.60
  -8   7  -1    2.80    3.40
  -8   7  -1    2.10    3.60
   8  -7   1    0.50    3.00
   8  -7   1    4.90    3.10
   8  -7   1    3.70    3.60
   8  -7   1   -1.40    3.00
   8  -7   1    2.90    4.10
   8  -7   1   -0.30    2.70
   8  -7   1    0.80    2.60
   8  -7   1    0.30    2.10
   8  -7   1    2.20    3.20
  -9   7  -1   26.10    6.50
  -9   7  -1   29.10    6.30
  -9   7  -1   23.70    6.50
  -9   7  -1   18.70    4.80
  -9   7  -1   34.70    7.10
  -9   7  -1   18.20    4.00
  -9   7  -1   19.80    5.10
  -9   7  -1   23.60    4.00
  -9   7  -1   16.40    4.90
  -9   7  -1   16.80    4.40
   9  -7   1   18.10    4.20
   9  -7   1   22.10    7.00
   9  -7   1   15.10    3.80
   9  -7   1   17.80    4.50
   9  -7   1   20.40    5.60
   9  -7   1   23.10    5.80
   9  -7   1   37.20    6.70
   9  -7   1   37.80    7.50
 -10   7  -1   56.19    8.20
 -10   7  -1   52.89    7.70
 -10   7  -1   45.50    9.90
 -10   7  -1   49.00    9.40
 -10   7  -1   68.99   11.70
 -10   7  -1   60.99    9.70
 -10   7  -1   57.19    9.10
 -10   7  -1   61.89   11.90
 -10   7  -1   44.00    6.10
 -10   7  -1   58.79   10.50
  10  -7   1   50.29    8.20
  10  -7   1   64.89    8.20
  10  -7   1   62.99    9.80
  10  -7   1   64.59    7.20
  10  -7   1   64.79    9.10
  10  -7   1   58.79    7.40
  10  -7   1   60.29    9.80
  10  -7   1   53.29   11.30
  10  -7   1   70.89   11.10
 -11   7  -1  494.55   27.60
 -11   7  -1  534.75   29.10
 -11   7  -1  551.14   30.20
 -11   7  -1  439.26   29.40
 -11   7  -1  507.45   31.40
 -11   7  -1  519.85   29.30
 -11   7  -1  584.74   28.50
 -11   7  -1  514.15   25.80
  11  -7   1  524.35   25.20
  11  -7   1  527.65   25.00
  11  -7   1  507.95   30.80
  11  -7   1  522.95   27.80
  11  -7   1  504.05   23.30
  11  -7   1  529.95   29.20
 -12   7  -1   -0.80    2.30
 -12   7  -1   -0.30    3.90
 -12   7  -1   -0.40    4.60
 -12   7  -1   -6.70    5.00
 -12   7  -1    3.90    5.00
 -12   7  -1   -3.90    4.50
 -12   7  -1   -1.60    3.60
  12  -7   1   -1.50    4.90
  12  -7   1    4.40    4.30
  12  -7   1   -1.70    2.40
  12  -7   1    1.70    5.80
  12  -7   1   -4.90    4.60
 -13   7  -1  592.84   37.40
 -13   7  -1  649.54   29.30
 -13   7  -1  697.93   39.60
 -13   7  -1  662.83   35.80
 -13   7  -1  610.34   34.10
 -13   7  -1  645.54   36.50
 -13   7  -1  693.13   34.60
  13  -7   1  684.23   35.80
  13  -7   1  649.93   38.10
  13  -7   1  642.04   34.20
  13  -7   1  624.94   30.60
 -14   7  -1   11.80    7.10
 -14   7  -1   20.10    7.50
 -14   7  -1   20.40    5.80
 -14   7  -1   17.20    4.20
 -14   7  -1   16.20    8.00
 -14   7  -1   22.90    7.50
  14  -7   1    6.50    5.80
  14  -7   1   15.10    5.90
  14  -7   1   25.00    7.40
  14  -7   1   30.00    9.40
 -15   7  -1  359.56   26.80
 -15   7  -1  387.66   29.60
 -15   7  -1  390.36   31.60
 -15   7  -1  358.46   25.10
 -15   7  -1  365.86   20.80
 -15   7  -1  381.16   27.50
  15  -7   1  407.36   30.80
  15  -7   1  368.86   22.10
  15  -7   1  395.16   27.10
  15   6  -1  416.96   29.00
  15   6  -1  419.56   28.00
  15   6  -1  445.86   33.60
  15   6  -1  399.16   20.50
 -15  -6   1  439.56   29.10
 -15  -6   1  447.66   26.20
 -15  -6   1  512.05   34.80
 -15  -6   1  515.35   30.90
  14   6  -1   15.00    4.30
  14   6  -1   17.40    7.00
  14   6  -1    9.10    6.30
  14   6  -1   20.10    7.90
  14   6  -1   21.70    4.30
  14   6  -1   21.10    8.60
 -14  -6   1   17.50    7.70
 -14  -6   1   13.30    3.80
 -14  -6   1   22.60    6.10
 -14  -6   1   15.20    6.30
 -14  -6   1   24.40    9.70
  13   6  -1  714.63   30.30
  13   6  -1  737.03   34.50
  13   6  -1  773.42   41.80
  13   6  -1  713.93   37.10
  13   6  -1  660.53   37.20
  13   6  -1  659.63   32.10
 -13  -6   1  734.73   44.90
 -13  -6   1  722.93   37.80
 -13  -6   1  695.83   34.20
 -13  -6   1  705.13   36.90
  12   6  -1  205.48   20.10
  12   6  -1  217.38   20.20
  12   6  -1  242.88   16.00
  12   6  -1  175.58   16.80
  12   6  -1  210.98   12.20
  12   6  -1  197.68   13.60
  12   6  -1  204.98   17.00
 -12  -6   1  208.18   16.30
 -12  -6   1  190.68   16.70
 -12  -6   1  190.38   17.10
 -12  -6   1  210.08   20.60
 -12  -6   1  205.38   14.60
 -12  -6   1  202.98   17.50
 -12  -6   1  213.78   11.80
  11   6  -1  775.82   32.60
  11   6  -1  785.32   38.60
  11   6  -1  799.42   42.10
  11   6  -1  748.23   35.70
  11   6  -1  724.63   34.20
  11   6  -1  802.32   36.10
  11   6  -1  775.12   36.60
  11   6  -1  833.72   52.19
  11   6  -1  769.02   37.60
 -11  -6   1  806.82   38.60
 -11  -6   1  705.93   48.00
 -11  -6   1  795.52   35.40
 -11  -6   1  819.12   42.20
 -11  -6   1  757.92   31.70
 -11  -6   1  781.12   36.40
  10   6  -1  235.18   15.80
  10   6  -1  251.67   20.10
  10   6  -1  264.17   18.00
  10   6  -1  273.67   17.60
  10   6  -1  264.67   15.90
  10   6  -1  243.18   15.70
  10   6  -1  248.58   15.30
  10   6  -1  277.97   20.70
  10   6  -1  288.37   14.20
 -10  -6   1  251.27   16.30
 -10  -6   1  247.48   12.60
 -10  -6   1  246.38   17.30
 -10  -6   1  265.17   17.80
 -10  -6   1  253.17   17.20
 -10  -6   1  263.97   15.30
 -10  -6   1  260.97   15.70
 -10  -6   1  274.97   20.80
   9   6  -1  157.38   11.10
   9   6  -1  164.28   11.50
   9   6  -1  150.38   14.90
   9   6  -1  166.38   11.20
   9   6  -1  134.19   11.00
   9   6  -1  153.08   12.70
   9   6  -1  142.19   12.70
   9   6  -1  157.08   14.60
  -9  -6   1  145.89    8.40
  -9  -6   1  138.69   14.10
  -9  -6   1  140.39   10.30
  -9  -6   1  137.09   11.20
  -9  -6   1  129.89   10.90
  -9  -6   1  160.08   12.70
  -9  -6   1  139.59   12.20
  -9  -6   1  150.98   12.90
   8   6  -1  165.18   14.50
   8   6  -1  196.98   13.50
   8   6  -1  159.38   11.20
   8   6  -1  167.98   14.90
   8   6  -1  151.18   11.10
   8   6  -1  172.68   11.40
   8   6  -1  177.88   12.90
   8   6  -1  155.08   11.30
  -8  -6   1  164.18   12.70
  -8  -6   1  165.78   11.50
  -8  -6   1  154.68   12.10
  -8  -6   1  162.38   12.40
  -8  -6   1  186.38   15.20
  -8  -6   1  176.28   11.30
  -8  -6   1  184.58   11.90
  -8  -6   1  176.58   10.90
  -8  -6   1  168.18    8.80
   7   6  -1    3.20    2.90
   7   6  -1    2.60    3.00
   7   6  -1    3.60    3.30
   7   6  -1    1.90    2.60
   7   6  -1    2.30    2.90
   7   6  -1    2.40    2.20
   7   6  -1    4.70    3.20
   7   6  -1    3.50    2.20
  -7  -6   1    2.30    2.30
  -7  -6   1    6.10    4.40
  -7  -6   1    3.40    2.80
  -7  -6   1    3.50    3.10
  -7  -6   1    3.60    3.00
  -7  -6   1    4.40    2.40
  -7  -6   1    4.80    1.50
  -7  -6   1    5.30    1.70
  -7  -6   1    8.10    3.10
  -7  -6   1    7.50    2.70
   6   6  -1  573.14   25.50
   6   6  -1  569.34   29.00
   6   6  -1  632.34   27.80
   6   6  -1  614.34   27.50
   6   6  -1  555.54   26.20
   6   6  -1  641.04   29.90
   6   6  -1  613.34   25.90
  -6  -6   1  598.64   25.50
  -6  -6   1  594.34   27.20
  -6  -6   1  585.34   26.90
  -6  -6   1  595.34   27.90
  -6  -6   1  592.44   23.40
  -6  -6   1  599.74   25.30
  -6  -6   1  608.94   23.00
  -6  -6   1  598.84   27.00
  -6  -6   1  616.74   25.80
  -6  -6   1  619.84   29.60
   5   6  -1  100.29    6.80
   5   6  -1   98.79   10.90
   5   6  -1  100.89    9.20
   5   6  -1   96.09    8.00
   5   6  -1   99.69    8.20
   5   6  -1   96.99    7.40
   5   6  -1  104.09    8.10
   5   6  -1   93.19    9.30
  -5  -6   1  100.49    5.40
  -5  -6   1  100.49    6.80
  -5  -6   1  102.19    9.00
  -5  -6   1  102.49    6.70
  -5  -6   1  113.49    8.20
  -5  -6   1   98.39    7.60
  -5  -6   1   99.79    7.10
  -5  -6   1  105.49    8.50
  -5  -6   1   99.99    8.10
   4   6  -1 1180.58   44.50
   4   6  -1 1169.08   47.20
   4   6  -1 1272.97   51.29
   4   6  -1 1193.98   45.10
   4   6  -1 1133.79   46.10
   4   6  -1 1012.60   45.20
   4   6  -1 1136.89   47.30
   4   6  -1 1111.29   43.80
  -4  -6   1 1176.68   45.70
  -4  -6   1 1140.09   44.30
  -4  -6   1 1214.18   43.80
  -4  -6   1 1144.99   43.80
  -4  -6   1 1169.78   42.80
  -4  -6   1 1136.99   46.20
  -4  -6   1 1133.69   45.40
  -4  -6   1 1143.19   45.20
  -4  -6   1 1162.28   47.50
  -4  -6   1 1096.59   46.00
   3   6  -1   22.90    3.70
   3   6  -1   24.30    4.30
   3   6  -1   24.60    4.10
   3   6  -1   30.90    3.70
   3   6  -1   28.70    5.00
   3   6  -1   29.40    3.70
   3   6  -1   23.50    4.10
   3   6  -1   26.20    2.80
  -3  -6   1   28.10    4.10
  -3  -6   1   22.60    3.90
  -3  -6   1   20.10    2.90
  -3  -6   1   22.40    4.40
  -3  -6   1   24.80    2.50
  -3  -6   1   30.50    3.70
  -3  -6   1   19.20    2.60
  -3  -6   1   26.10    4.60
  -3  -6   1   19.60    3.20
  -3  -6   1   23.30    3.80
   2   6  -1 2738.03   93.49
   2   6  -1 2477.55   91.49
   2   6  -1 2454.05   93.79
   2   6  -1 2390.06   89.89
   2   6  -1 2270.67   90.29
   2   6  -1 2330.37   93.29
   2   6  -1 2572.14   91.39
   2   6  -1 2559.14   92.49
   2   6  -1 2659.83   93.49
   2   6  -1 2479.75   92.39
   2   6  -1 2403.36   91.79
  -2  -6   1 2499.65   92.09
  -2  -6   1 2481.15   92.09
  -2  -6   1 2523.85   92.89
  -2  -6   1 2528.85   90.89
  -2  -6   1 2515.65   93.79
  -2  -6   1 2522.65   93.79
  -2  -6   1 2516.75   91.09
  -2  -6   1 2501.05   91.29
   1   6  -1  632.44   25.10
   1   6  -1  640.94   24.50
   1   6  -1  548.35   23.50
   1   6  -1  648.34   26.00
   1   6  -1  590.64   24.50
   1   6  -1  601.34   25.80
   1   6  -1  589.84   25.80
   1   6  -1  628.24   25.20
   1   6  -1  626.74   26.60
   1   6  -1  631.04   24.80
  -1  -6   1  629.74   24.50
  -1  -6   1  629.24   23.70
  -1  -6   1  641.14   25.50
  -1  -6   1  645.94   26.20
  -1  -6   1  604.64   26.50
  -1  -6   1  619.34   24.10
  -1  -6   1  636.84   24.80
  -1  -6   1  623.54   24.60
   0   6  -1 3419.16  131.39
   0   6  -1 3444.46  130.09
   0   6  -1 3672.13  131.59
   0   6  -1 3681.83  131.79
   0   6  -1 3666.93  132.59
   0   6  -1 3481.95  130.89
   0   6  -1 3634.84  130.09
   0   6  -1 3469.35  130.59
   0   6  -1 3667.93  130.89
   0  -6   1 3674.13  131.79
   0  -6   1 3724.53  131.99
   0  -6   1 3593.44  129.29
   0  -6   1 3526.65  129.59
   0  -6   1 3609.04  130.69
   0  -6   1 3709.53  129.79
   0  -6   1 3339.47  132.09
   0  -6   1 3615.44  130.39
   0  -6   1 3593.74  131.09
  -1   6  -1  872.71   34.40
  -1   6  -1  875.91   35.00
  -1   6  -1  871.31   33.70
  -1   6  -1  896.31   35.20
  -1   6  -1  908.21   34.30
  -1   6  -1  847.92   34.90
  -1   6  -1  815.92   33.50
  -1   6  -1  852.61   35.20
   1  -6   1  899.51   33.90
   1  -6   1  933.31   35.60
   1  -6   1  905.41   32.80
   1  -6   1  903.41   34.70
   1  -6   1  912.91   35.30
   1  -6   1  869.41   35.60
   1  -6   1  867.71   34.60
   1  -6   1  869.11   33.30
   1  -6   1  882.81   32.90
  -2   6  -1  254.47   12.50
  -2   6  -1  234.28   10.80
  -2   6  -1  226.48   12.10
  -2   6  -1  215.58   10.50
  -2   6  -1  246.58    9.80
  -2   6  -1  218.98    9.40
  -2   6  -1  245.88   12.40
  -2   6  -1  231.88   11.50
  -2   6  -1  216.58   11.70
  -2   6  -1  222.18   11.10
   2  -6   1  231.78   10.00
   2  -6   1  245.88   12.30
   2  -6   1  260.77   12.60
   2  -6   1  236.28   12.40
   2  -6   1  218.08   11.70
   2  -6   1  239.98   11.00
   2  -6   1  234.08    9.90
   2  -6   1  249.78   10.60
   2  -6   1  246.48   11.70
  -3   6  -1  242.58   10.70
  -3   6  -1  242.68   12.10
  -3   6  -1  229.18   12.30
  -3   6  -1  228.68   11.00
  -3   6  -1  229.88   12.80
  -3   6  -1  220.88   11.50
  -3   6  -1  223.28   12.50
  -3   6  -1  251.97   11.40
  -3   6  -1  245.58   12.20
  -3   6  -1  249.48   13.10
   3  -6   1  231.78   12.60
   3  -6   1  221.88   11.10
   3  -6   1  243.18   12.50
   3  -6   1  243.48   12.30
   3  -6   1  233.38   12.80
   3  -6   1  248.48   11.00
   3  -6   1  248.58   10.80
   3  -6   1  222.38   12.20
   3  -6   1  239.58   10.50
  -4   6  -1   63.19    6.60
  -4   6  -1   62.29    5.60
  -4   6  -1   54.39    6.00
  -4   6  -1   54.39    5.30
  -4   6  -1   64.09    6.30
  -4   6  -1   61.19    4.90
  -4   6  -1   57.99    4.90
  -4   6  -1   64.49    5.30
  -4   6  -1   73.29    8.10
  -4   6  -1   61.69    6.00
   4  -6   1   57.19    5.70
   4  -6   1   57.09    5.70
   4  -6   1   60.49    5.20
   4  -6   1   70.69    5.80
   4  -6   1   66.19    6.20
   4  -6   1   58.69    4.90
   4  -6   1   60.29    5.00
   4  -6   1   58.69    4.40
   4  -6   1   51.79    6.20
   4  -6   1   66.59    6.80
  -5   6  -1  232.48   12.60
  -5   6  -1  263.67   12.50
  -5   6  -1  247.18   12.40
  -5   6  -1  253.27   12.70
  -5   6  -1  230.18   13.90
  -5   6  -1  245.28   14.60
  -5   6  -1  269.87   14.80
  -5   6  -1  204.08   12.50
  -5   6  -1  253.37   13.60
   5  -6   1  249.97   12.30
   5  -6   1  241.18   12.00
   5  -6   1  244.98   11.60
   5  -6   1  246.38   13.20
   5  -6   1  229.68   12.40
   5  -6   1  274.57   14.70
   5  -6   1  249.58   13.80
   5  -6   1  229.58   13.50
   5  -6   1  228.58   14.40
  -6   6  -1   58.19    6.20
  -6   6  -1   57.69    6.30
  -6   6  -1   63.29    6.00
  -6   6  -1   72.29    7.90
  -6   6  -1   60.89    6.50
  -6   6  -1   69.69    6.50
  -6   6  -1   50.19    6.80
  -6   6  -1   72.49    8.10
  -6   6  -1   62.59    8.10
   6  -6   1   56.89    6.20
   6  -6   1   59.09    6.90
   6  -6   1   55.59    6.90
   6  -6   1   64.39    7.90
   6  -6   1   66.29    6.90
   6  -6   1   64.09    6.90
   6  -6   1   70.99    8.30
   6  -6   1   64.49    6.30
   6  -6   1   62.49    5.50
  -7   6  -1 1129.29   51.19
  -7   6  -1 1246.08   50.29
  -7   6  -1 1253.17   48.40
  -7   6  -1 1270.87   49.00
  -7   6  -1 1226.58   48.70
  -7   6  -1 1262.27   52.29
  -7   6  -1 1253.37   51.29
  -7   6  -1 1153.08   49.30
  -7   6  -1 1137.09   48.50
   7  -6   1 1179.38   50.79
   7  -6   1 1318.67   50.99
   7  -6   1 1240.78   47.70
   7  -6   1 1243.48   48.40
   7  -6   1 1105.99   49.60
   7  -6   1 1205.38   49.70
   7  -6   1 1172.48   48.70
   7  -6   1 1218.28   51.69
  -8   6  -1   31.10    7.50
  -8   6  -1   31.60    7.30
  -8   6  -1   29.30    6.40
  -8   6  -1   21.60    4.40
  -8   6  -1   29.90    5.40
  -8   6  -1   31.60    7.10
  -8   6  -1   26.20    5.00
  -8   6  -1   27.10    5.30
   8  -6   1   28.50    5.40
   8  -6   1   22.70    4.40
   8  -6   1   30.60    5.90
   8  -6   1   34.30    7.60
   8  -6   1   34.10    5.40
   8  -6   1   29.20    7.00
   8  -6   1   24.10    6.40
   8  -6   1   22.50    4.10
   8  -6   1   26.30    5.40
  -9   6  -1 1177.48   52.09
  -9   6  -1 1072.39   50.89
  -9   6  -1 1184.28   48.30
  -9   6  -1 1186.28   48.00
  -9   6  -1 1144.29   47.10
  -9   6  -1 1192.88   49.00
  -9   6  -1 1148.89   49.50
  -9   6  -1 1108.29   46.90
  -9   6  -1 1185.18   50.49
   9  -6   1 1195.68   51.59
   9  -6   1 1122.59   48.60
   9  -6   1 1092.19   50.19
   9  -6   1 1163.58   49.50
   9  -6   1 1072.19   48.40
   9  -6   1 1072.39   47.50
   9  -6   1 1109.19   46.00
   9  -6   1 1128.39   47.20
   9  -6   1 1203.78   46.40
 -10   6  -1  489.45   28.60
 -10   6  -1  434.06   27.30
 -10   6  -1  474.05   24.50
 -10   6  -1  474.05   23.80
 -10   6  -1  479.25   26.70
 -10   6  -1  477.85   25.00
 -10   6  -1  487.55   23.50
 -10   6  -1  485.85   26.30
 -10   6  -1  462.75   25.20
  10  -6   1  482.35   26.20
  10  -6   1  474.85   25.30
  10  -6   1  483.55   23.00
  10  -6   1  500.35   28.30
  10  -6   1  439.76   25.30
  10  -6   1  470.95   22.70
  10  -6   1  453.95   27.30
  10  -6   1  480.35   24.10
 -11   6  -1  802.92   42.60
 -11   6  -1  858.71   38.90
 -11   6  -1  778.12   39.00
 -11   6  -1  788.52   35.20
 -11   6  -1  776.72   38.70
 -11   6  -1  867.61   41.40
 -11   6  -1  826.32   37.00
 -11   6  -1  787.72   37.70
 -11   6  -1  904.01   41.10
 -11   6  -1  919.91   44.80
  11  -6   1  868.21   36.70
  11  -6   1  807.32   38.30
  11  -6   1  887.51   39.80
  11  -6   1  902.21   42.90
  11  -6   1  876.91   43.60
  11  -6   1  798.22   36.20
  11  -6   1  848.62   39.30
 -12   6  -1  268.87   19.40
 -12   6  -1  271.97   20.70
 -12   6  -1  262.47   18.70
 -12   6  -1  271.67   19.20
 -12   6  -1  288.47   21.10
 -12   6  -1  253.07   15.60
 -12   6  -1  272.27   17.10
 -12   6  -1  245.68   24.60
 -12   6  -1  259.17   22.50
  12  -6   1  316.37   20.50
  12  -6   1  295.27   20.70
  12  -6   1  283.97   17.20
  12  -6   1  326.97   23.70
 -13   6  -1  159.38   16.30
 -13   6  -1  145.59   16.80
 -13   6  -1  145.99   14.90
 -13   6  -1  126.99   14.30
 -13   6  -1  166.48   15.50
 -13   6  -1  127.09   16.50
 -13   6  -1  160.18   12.00
 -13   6  -1  189.98   19.80
  13  -6   1  137.19   16.50
  13  -6   1  146.99   12.50
  13  -6   1  194.08   19.30
  13  -6   1  139.29    9.40
  13  -6   1  154.18   15.50
 -14   6  -1   62.09   14.20
 -14   6  -1   65.99   12.00
 -14   6  -1   71.19   12.20
 -14   6  -1   39.00    8.50
 -14   6  -1   62.19    9.10
 -14   6  -1   38.90    9.60
  14  -6   1   48.10    5.40
  14  -6   1   40.30    8.80
  14  -6   1   75.69   15.70
  14  -6   1   51.79    5.30
  14  -6   1   29.40    7.80
  14  -6   1   73.69   10.60
 -15   6  -1    6.70    3.90
 -15   6  -1   21.90    9.30
 -15   6  -1   -2.00    5.10
 -15   6  -1   13.70   11.30
 -15   6  -1    8.50    6.10
  15  -6   1   23.20    9.70
  15  -6   1    8.90    7.10
  15  -6   1    7.10    5.10
  15  -6   1   22.70    7.00
  16   5  -1   69.19   14.30
  16   5  -1   76.39   12.70
  16   5  -1   45.50    6.80
  16   5  -1   82.39   16.90
 -16  -5   1   68.99   13.90
 -16  -5   1   57.69   12.70
 -16  -5   1   37.60   13.30
 -16  -5   1   86.09   17.70
  15   5  -1  153.58   20.20
  15   5  -1  168.48   15.70
  15   5  -1  161.18   10.70
  15   5  -1  167.28   17.70
  15   5  -1  113.69   11.20
  15   5  -1  166.58   17.50
 -15  -5   1  185.18   15.70
 -15  -5   1  154.28   16.60
 -15  -5   1  164.08   12.00
 -15  -5   1  154.28   19.80
 -15  -5   1  181.98   19.30
  14   5  -1  213.88   19.00
  14   5  -1  197.48   11.80
  14   5  -1  171.38   19.70
  14   5  -1  190.18   13.20
  14   5  -1  182.98   19.10
  14   5  -1  180.58   16.00
 -14  -5   1  206.08   13.10
 -14  -5   1  204.18   18.30
 -14  -5   1  190.48   16.00
 -14  -5   1  211.18   19.40
 -14  -5   1  189.78   22.10
  13   5  -1   -0.80    6.20
  13   5  -1   -0.20    4.70
  13   5  -1   -0.60    4.80
  13   5  -1    1.50    2.50
  13   5  -1   -0.20    2.50
  13   5  -1   -1.50    4.80
 -13  -5   1   -0.80    2.40
 -13  -5   1    9.00    5.50
 -13  -5   1    1.50    5.60
 -13  -5   1   -0.70    5.90
 -13  -5   1    1.10    4.00
 -13  -5   1   -3.80    3.40
  12   5  -1   13.10    3.10
  12   5  -1   13.10    5.60
  12   5  -1   10.60    3.40
  12   5  -1   13.80    5.30
  12   5  -1   10.20    6.50
  12   5  -1    5.20    5.60
  12   5  -1   24.30    9.20
 -12  -5   1   12.80    7.10
 -12  -5   1   12.90    5.40
 -12  -5   1   13.70    5.20
 -12  -5   1    6.70    4.80
 -12  -5   1   10.60    5.20
 -12  -5   1   16.70    3.80
 -12  -5   1    7.30    5.30
  11   5  -1    3.90    4.30
  11   5  -1    5.50    4.90
  11   5  -1    5.90    2.60
  11   5  -1    6.20    5.70
  11   5  -1    5.10    4.40
  11   5  -1    4.10    3.40
  11   5  -1   10.00    3.20
  11   5  -1    9.40    5.60
 -11  -5   1    1.50    5.00
 -11  -5   1    5.90    2.70
 -11  -5   1    5.80    3.90
 -11  -5   1    5.40    3.40
 -11  -5   1    3.70    4.30
 -11  -5   1   -1.40    4.50
  10   5  -1  706.13   40.70
  10   5  -1  680.43   36.40
  10   5  -1  671.13   30.00
  10   5  -1  691.93   33.60
  10   5  -1  695.43   30.90
  10   5  -1  756.72   37.10
  10   5  -1  632.64   30.80
  10   5  -1  698.53   33.10
 -10  -5   1  638.04   32.80
 -10  -5   1  674.83   32.70
 -10  -5   1  656.53   28.00
 -10  -5   1  648.14   30.70
 -10  -5   1  670.93   32.90
 -10  -5   1  647.84   30.30
 -10  -5   1  671.83   36.20
 -10  -5   1  665.73   31.60
   9   5  -1   11.70    4.70
   9   5  -1   14.90    4.50
   9   5  -1   12.50    5.00
   9   5  -1    7.40    3.90
   9   5  -1   14.60    5.40
   9   5  -1   12.60    3.50
   9   5  -1    9.30    2.90
   9   5  -1    5.00    3.90
  -9  -5   1   16.60    3.00
  -9  -5   1   10.40    4.30
  -9  -5   1    8.50    3.30
  -9  -5   1   12.40    4.30
  -9  -5   1   13.00    5.60
  -9  -5   1   20.70    4.20
  -9  -5   1   17.30    4.20
  -9  -5   1   14.90    4.40
  -9  -5   1   11.30    4.90
   8   5  -1  904.71   42.50
   8   5  -1  927.81   37.80
   8   5  -1  913.31   40.00
   8   5  -1  965.00   42.80
   8   5  -1  856.81   38.10
   8   5  -1  900.51   37.90
   8   5  -1  962.60   39.80
   8   5  -1  949.60   40.30
  -8  -5   1  878.61   35.20
  -8  -5   1  867.01   37.20
  -8  -5   1  925.51   38.20
  -8  -5   1  861.01   42.50
  -8  -5   1  875.61   37.60
  -8  -5   1  971.10   43.00
  -8  -5   1  892.61   39.60
  -8  -5   1  821.02   39.10
   7   5  -1   82.19    7.40
   7   5  -1   65.19    6.60
   7   5  -1   77.19    7.30
   7   5  -1  105.09    9.30
   7   5  -1   87.29    7.40
   7   5  -1  100.29   10.60
   7   5  -1   74.69    9.30
   7   5  -1   88.89    8.60
  -7  -5   1   84.19    9.70
  -7  -5   1   77.59    5.50
  -7  -5   1   87.49    9.00
  -7  -5   1   89.29    7.70
  -7  -5   1   73.89    7.10
  -7  -5   1   85.69    6.80
  -7  -5   1   90.09   10.00
  -7  -5   1   78.99    7.80
  -7  -5   1   84.19    8.40
   6   5  -1 2646.84  104.49
   6   5  -1 2733.43  100.49
   6   5  -1 2618.54  101.19
   6   5  -1 2771.02  101.29
   6   5  -1 3033.20  103.09
   6   5  -1 2726.93  100.49
   6   5  -1 2725.23  102.09
   6   5  -1 2843.72  104.99
  -6  -5   1 2733.33  102.19
  -6  -5   1 2649.83   98.39
  -6  -5   1 2726.63  104.49
  -6  -5   1 2566.54  101.69
  -6  -5   1 2690.03  100.09
  -6  -5   1 2548.25  101.99
  -6  -5   1 2603.14  101.19
  -6  -5   1 2581.34  104.19
  -6  -5   1 2662.93  100.39
   5   5  -1  536.35   26.80
   5   5  -1  642.04   26.10
   5   5  -1  620.64   27.00
   5   5  -1  626.74   29.00
[truncated: 23,788,019 more chars]
